# Supplementary material for: Cross metathesis of allyl alcohols: how to suppress and how to promote double bond isomerization
Source: Royal Society of Chemistry journal article supplement (doi:10.1039/c3ob40167g), 2013-01-01

## Supporting information

### Cross metathesis of allyl alcohols: how to suppress and how to promote double bond isomerization

*Bernd Schmidt,\* Sylvia Hauke*

*Universitaet Potsdam, Institut fuer Chemie, Organische Synthesechemie,*

*Karl-Liebknecht-Strasse 24-25, D-14476 Golm, Germany*

*bernd.schmidt@uni-potsdam.de*

#### Table of Content

|   |                                                                                |      |
|---|--------------------------------------------------------------------------------|------|
| A | General Remarks                                                                | S 2  |
| B | Experimental procedure, analytical data and copies of NMR spectra of <b>4e</b> | S 3  |
| C | Copies of NMR spectra of cross metathesis products <b>5</b>                    | S 6  |
| D | Copies of NMR spectra of cross metathesis/isomerization products <b>6</b>      | S 38 |
| E | Copies of NMR spectra of compounds <b>7, 8a, 8b, 9a, 9b, 10</b> and <b>11</b>  | S 70 |

## A General Remarks

All experiments were conducted in dry reaction vessels under an atmosphere of dry nitrogen. Solvents were purified by standard procedures. <sup>1</sup>H NMR spectra were obtained at 300 MHz or at 600 MHz in CDCl<sub>3</sub> with CHCl<sub>3</sub> ( $\delta$  = 7.24 ppm) as an internal standard. Coupling constants (*J*) are given in Hz. <sup>13</sup>C NMR spectra were recorded at 75 MHz or at 150 MHz in CDCl<sub>3</sub> with CDCl<sub>3</sub> ( $\delta$  = 77.0 ppm) as an internal standard. The number of coupled protons was analyzed by APT-experiments and is denoted by a number in parentheses following the chemical shift value. IR spectra were recorded neat on NaCl or KBr plates. Wavenumbers ( $\nu$ ) are given in cm<sup>-1</sup>. The peak intensities are defined as strong (s), medium (m) or weak (w). Mass spectra were obtained at 70 eV. The allyl alcohols **4a**<sup>[1]</sup>, **4b**<sup>[2]</sup>, **4c**<sup>[3]</sup>, **4d**<sup>[4]</sup>, **4f**<sup>[5]</sup>, **4g**<sup>[6]</sup>, **4h**<sup>[7]</sup>, **4i**<sup>[8]</sup>, **4j**<sup>[9]</sup>, **4k**<sup>[10]</sup>, **4l**<sup>[11]</sup>, **4m**<sup>[12]</sup>, **4n**<sup>[13]</sup>, **4o**<sup>[14]</sup>, **4p**<sup>[15]</sup> were synthesized following literature procedures.

---

<sup>1</sup> S. V. Ley, A. Armstrong, D. Díez-Martín, M. J. Ford, P. Grice, J. G. Knight, H. C. Kolb, A. Madin, C. A. Marby, S. Mukherjee, A. N. Shaw, A. M. Z. Slawin, S. Vile, A. D. White, D. J. Williams and M. Woods, *J. Chem. Soc., Perkin Trans. 1*, 1991, 667-692.

<sup>2</sup> S. Jautze and R. Peters, *Angew. Chem., Int. Ed.* 2008, **47**, 9284-9288.

<sup>3</sup> J. Stambasky, A. V. Malkov and P. Kocovsky, *J. Org. Chem.* 2008, **73**, 9148-9150.

<sup>4</sup> D. Wigfield, S. Feiner, G. Malbacho and K. Taymaz, *Tetrahedron* 1974, **30**, 2949-2959.

<sup>5</sup> H. Azuma, K. Miyasaka, T. Yokotani, T. Tachibana, A. Kojima-Yuasa, I. Matsui-Yuasa, and K. Ogino, *Bioorg. Med. Chem.* 2006, **14**, 1811-1818.

<sup>6</sup> J. Krauss and D. Unterreitmeier, *Arch. Pharm. Chem. Life Sci.* 2002, **335**, 94-98.

<sup>7</sup> A. W. J. Logan, M. S. Hallside, J. W. Burton, and J. S. Parker, *Org. Lett.* 2012, **14**, 2940-2943.

<sup>8</sup> H. Lin, Y. Liu and Z.-L. Wu, *Chem. Comm.* 2011, **47**, 2610-2612.

<sup>9</sup> B. Trost and R. Kulawiec, *J. Am. Chem. Soc.* 1993, **115**, 2027-2036.

<sup>10</sup> M. E. Maier, H. Kandler, B. U. Haller, J. H. Hofmann and H. Fischer, *H. Liebigs Ann. Chem.* 1990, 323-330.

<sup>11</sup> N. Sarkar, A. Nayek, and S. Ghosh, *Org. Lett.* 2004, **6**, 1903-1905.

<sup>12</sup> B. Schmidt, *J. Org. Chem.* 2004, **69**, 7672-7687.

<sup>13</sup> H. E. Ramsden, J. R. Leebrick, S. D. Rosenberg, E. H. Miller, J. J. Walburn, A. E. Balint and R. Cserr, *J. Org. Chem.* 1957, **22**, 1602-1605.

<sup>14</sup> T. J. Deming, B. M. Novak and J. W. Ziller, *J. Am. Chem. Soc.* 1994, **116**, 2366-2374.

<sup>15</sup> R. G. Woolford, *J. Org. Chem.* 1958, **23**, 2042-2043.

## B Experimental procedure, analytical data and copies of NMR spectra of 4e

### Synthesis of 1-(3-methoxy-4-(methoxymethoxy)-phenyl)-prop-2-en-1-ol (4e)

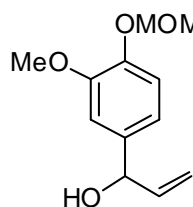

To a solution of MOM-protected vanilline<sup>[16]</sup> (577 mg, 2.9 mmol) in CH<sub>2</sub>Cl<sub>2</sub> (15 mL) was added a solution of vinyl magnesium chloride in THF (1.7 M, 1.8 mL, 3.1 mmol) at 0°C. The mixture was stirred for 0.5 h and then poured onto an aqueous NH<sub>4</sub>Cl solution. The organic layer was separated, and the aqueous layer was extracted twice with MTBE. The combined organic extracts were dried with MgSO<sub>4</sub>, filtered, and the solvent was evaporated under reduced pressure. After purification by column chromatography the allyl alcohol **4e** (548 mg, 83%) was obtained as a colourless liquid. <sup>1</sup>H NMR (300 MHz, CDCl<sub>3</sub>) δ 7.09 (d, *J* = 8.2, 1H), 6.93 (d, *J* = 1.9, 1H), 6.85 (dd, *J* = 8.2, 1.6, 1H), 6.02 (ddd, *J* = 17.1, 10.3, 5.8, 1H), 5.33 (ddd, *J* = 17.1, 1.4, 1.4, 1H), 5.19 (s, 2H), 5.17 (ddd, *J* = 10.3, 1.4, 1.3, 1H), 5.13 (d, *J* = 5.9, 1H), 3.86 (s, 3H), 3.49 (s, 3H), 2.20 (bs, 3H); <sup>13</sup>C NMR (75 MHz, CDCl<sub>3</sub>) δ 150.0 (0), 146.0 (0), 140.2 (1), 137.2 (0), 118.7 (1), 116.6 (1), 114.9 (2), 110.1 (1), 95.6 (2), 75.0 (1), 56.1 (3), 55.9 (3); IR (neat): ν 3418 (w), 2937 (w), 1509 (s), 1260 (s), 1152 (s), 1131 (s), 985 (s); MS (EI): *m/z* 224 ([M]<sup>+</sup>, 38), 162 (35), 119 (17), 55 (17), 45 (100); HRMS (EI): calcd for C<sub>12</sub>H<sub>16</sub>O<sub>4</sub> [M]<sup>+</sup>: 224.1056, found: 224.1049.

<sup>16</sup> Prepared according to: K. Tangdenpaisal, S. Sualek, S. Ruchirawat and P. Ploypradith, *Tetrahedron* 2009, **65**, 4316-4325.

$^1\text{H}$  NMR ( $\text{CDCl}_3$ , 300 MHz) of **4e**

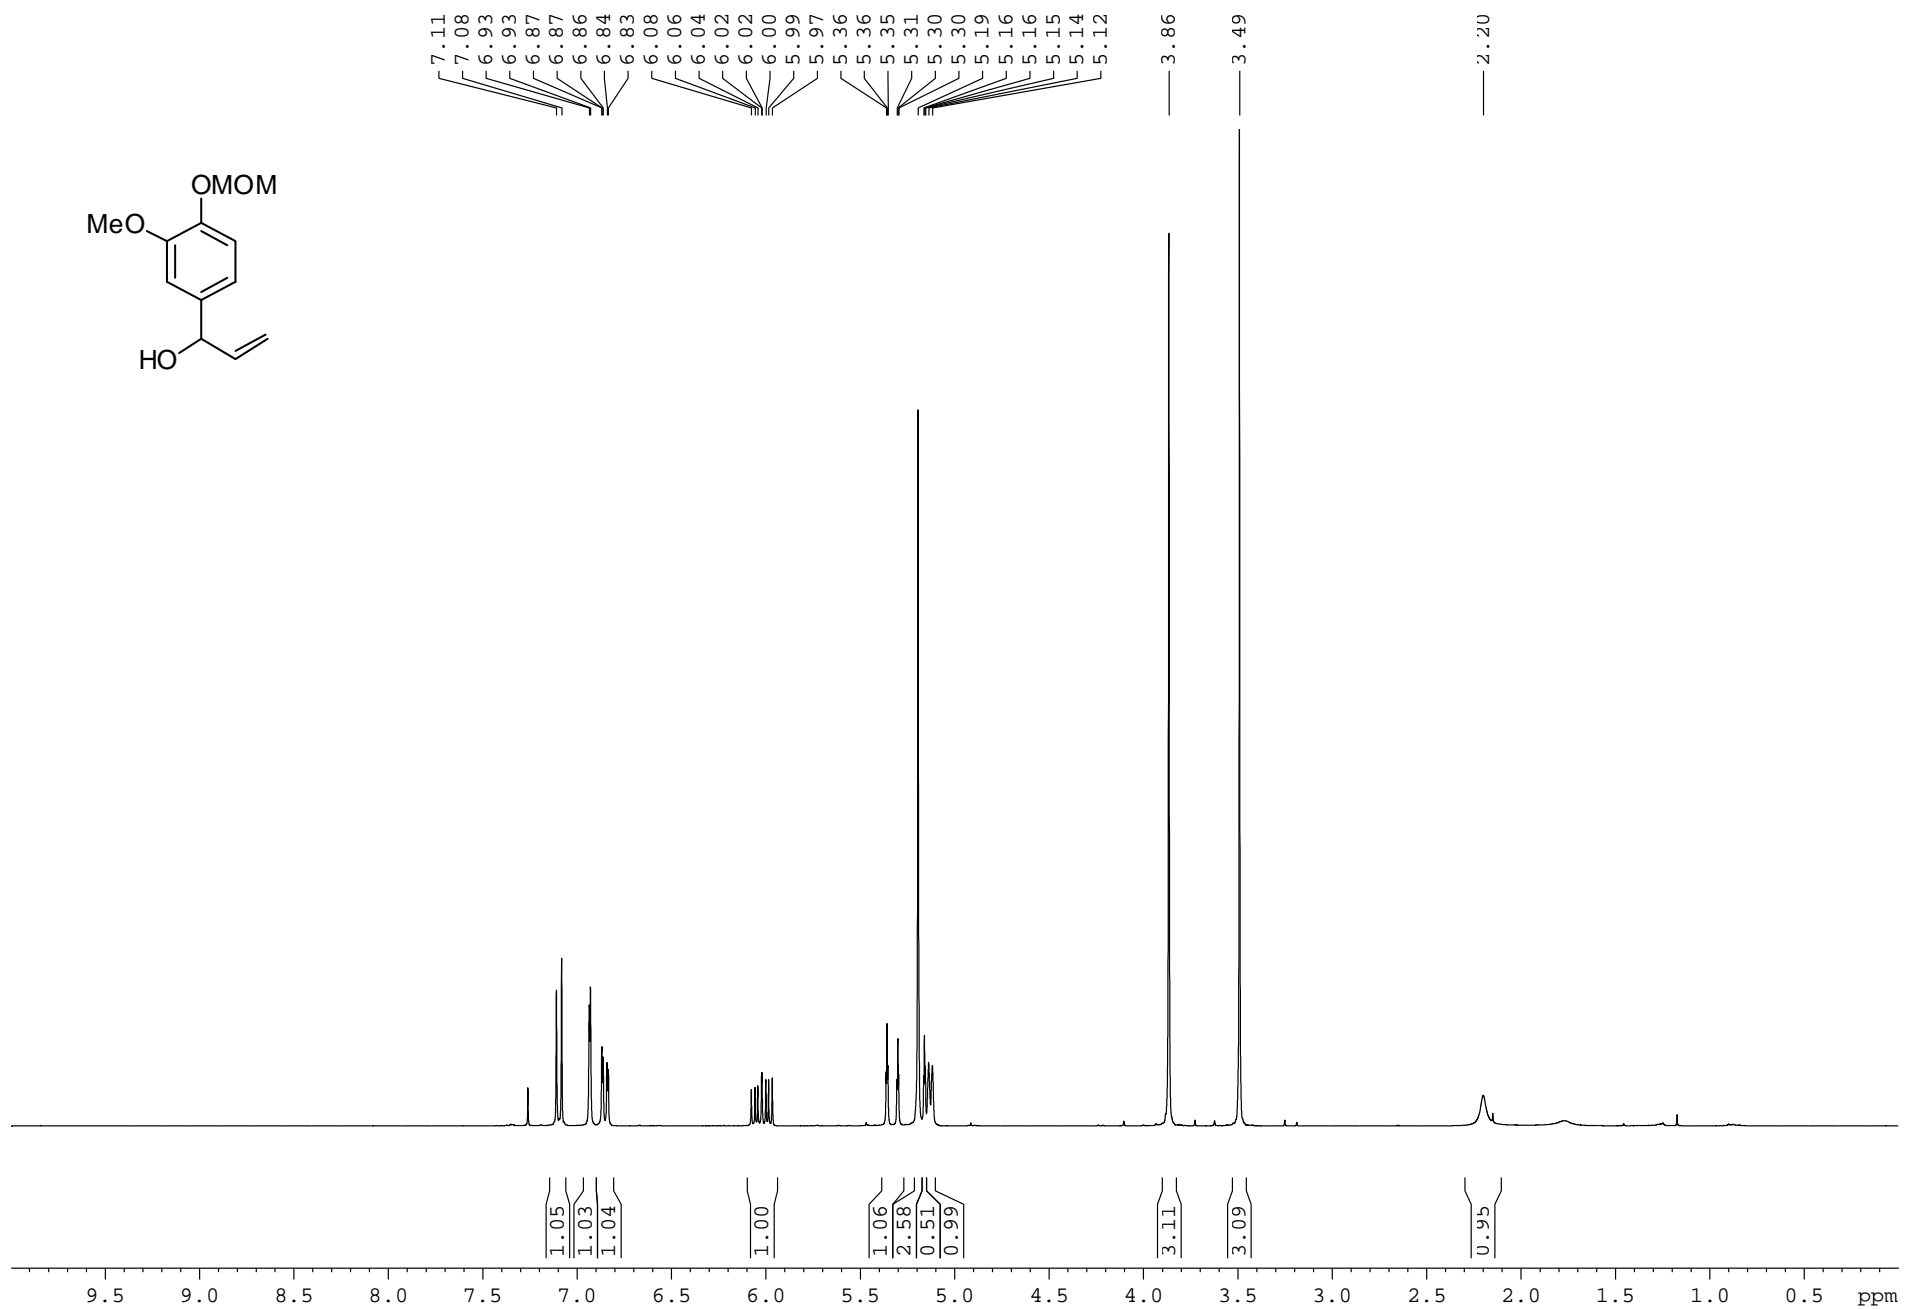

$^{13}\text{C}$  NMR-APT ( $\text{CDCl}_3$ , 75 MHz) of **4e**

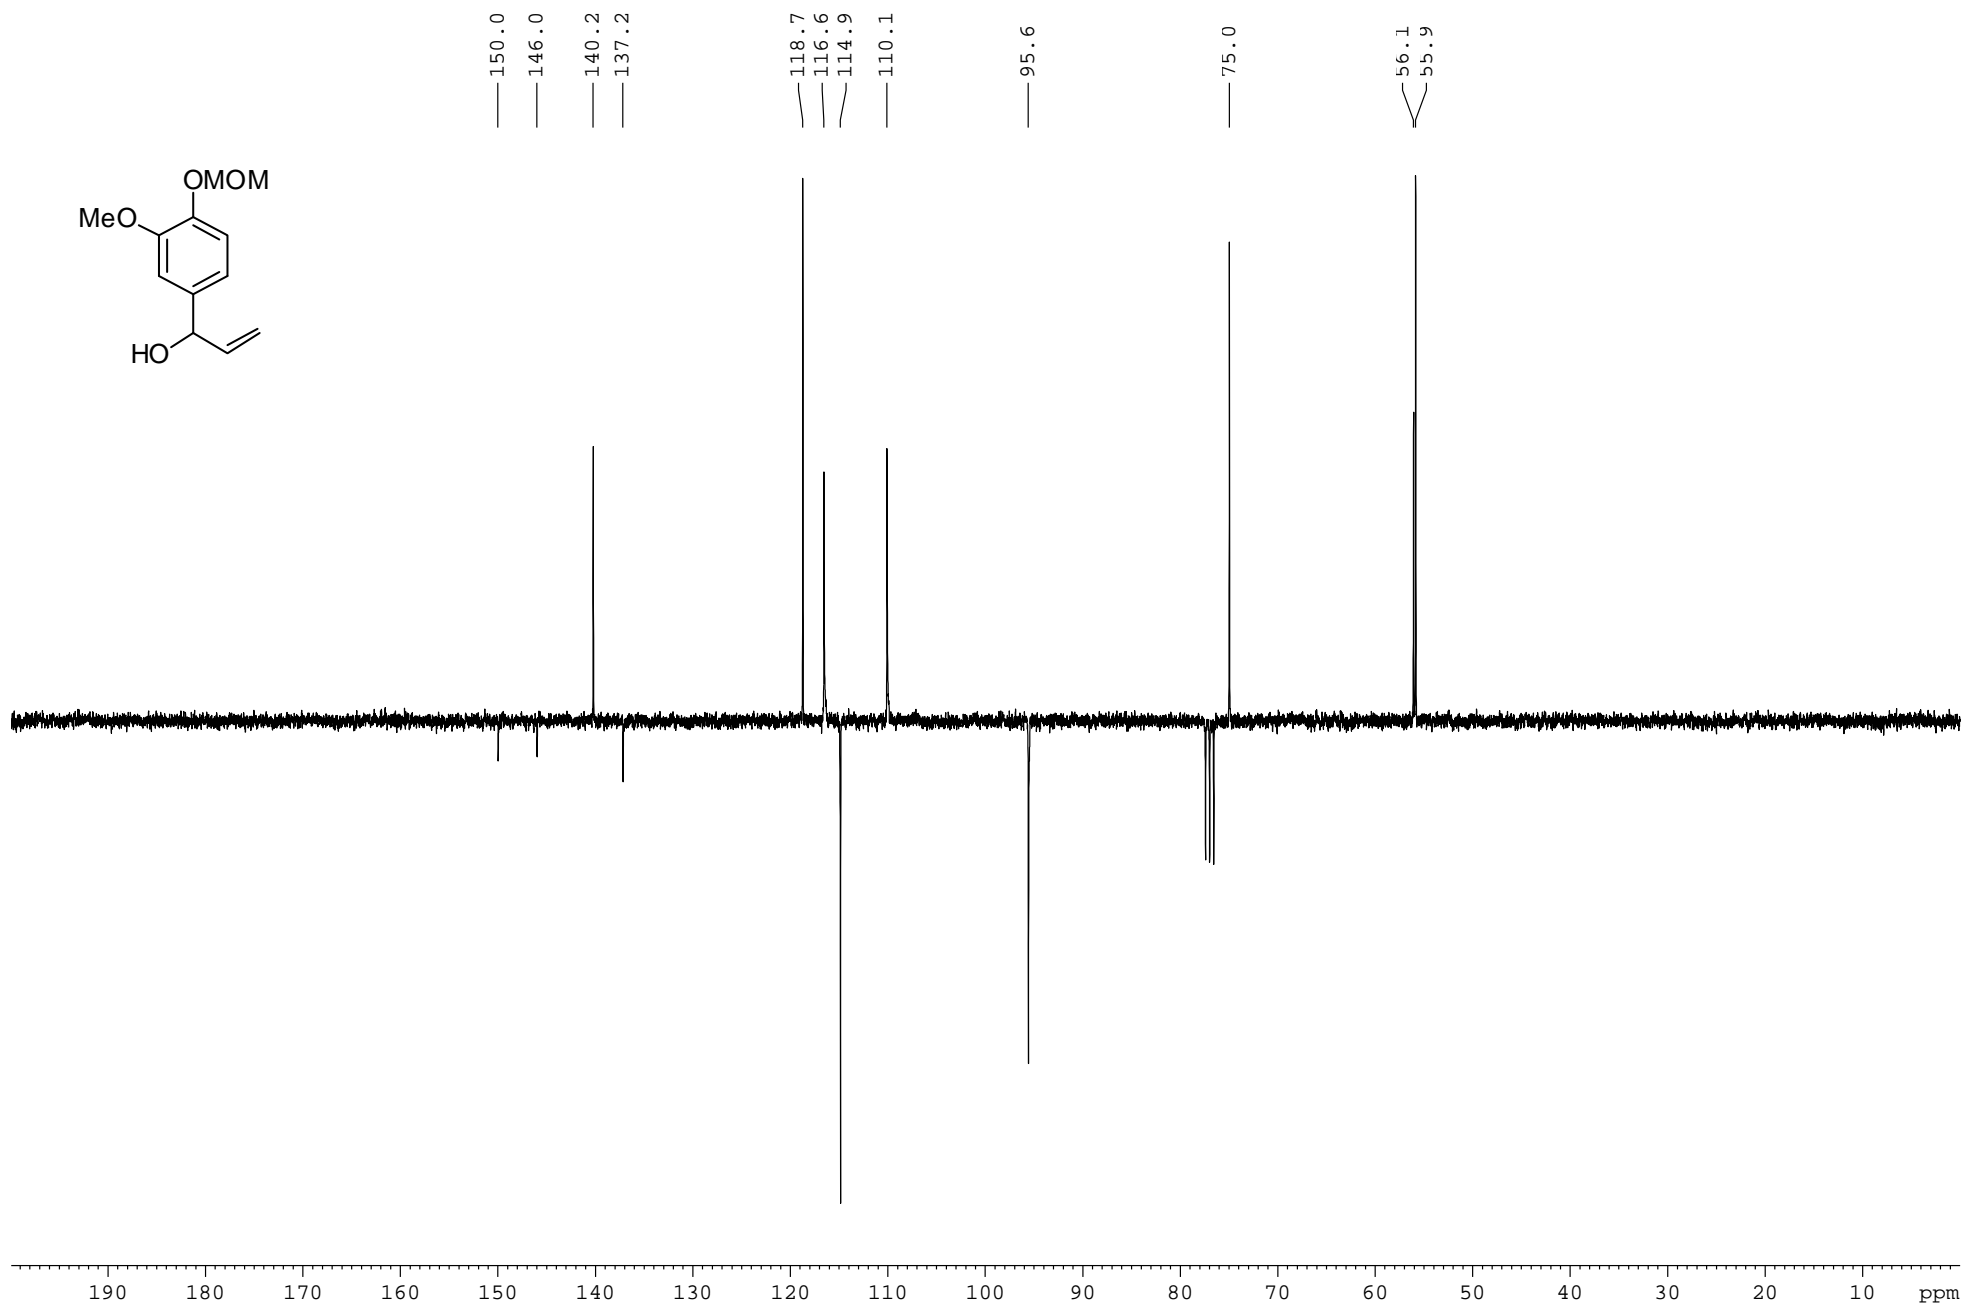

### C Copies of NMR spectra of cross metathesis products 5

<sup>1</sup>H NMR (CDCl<sub>3</sub>, 300 MHz) of 5a

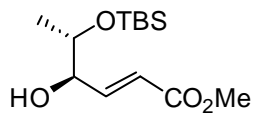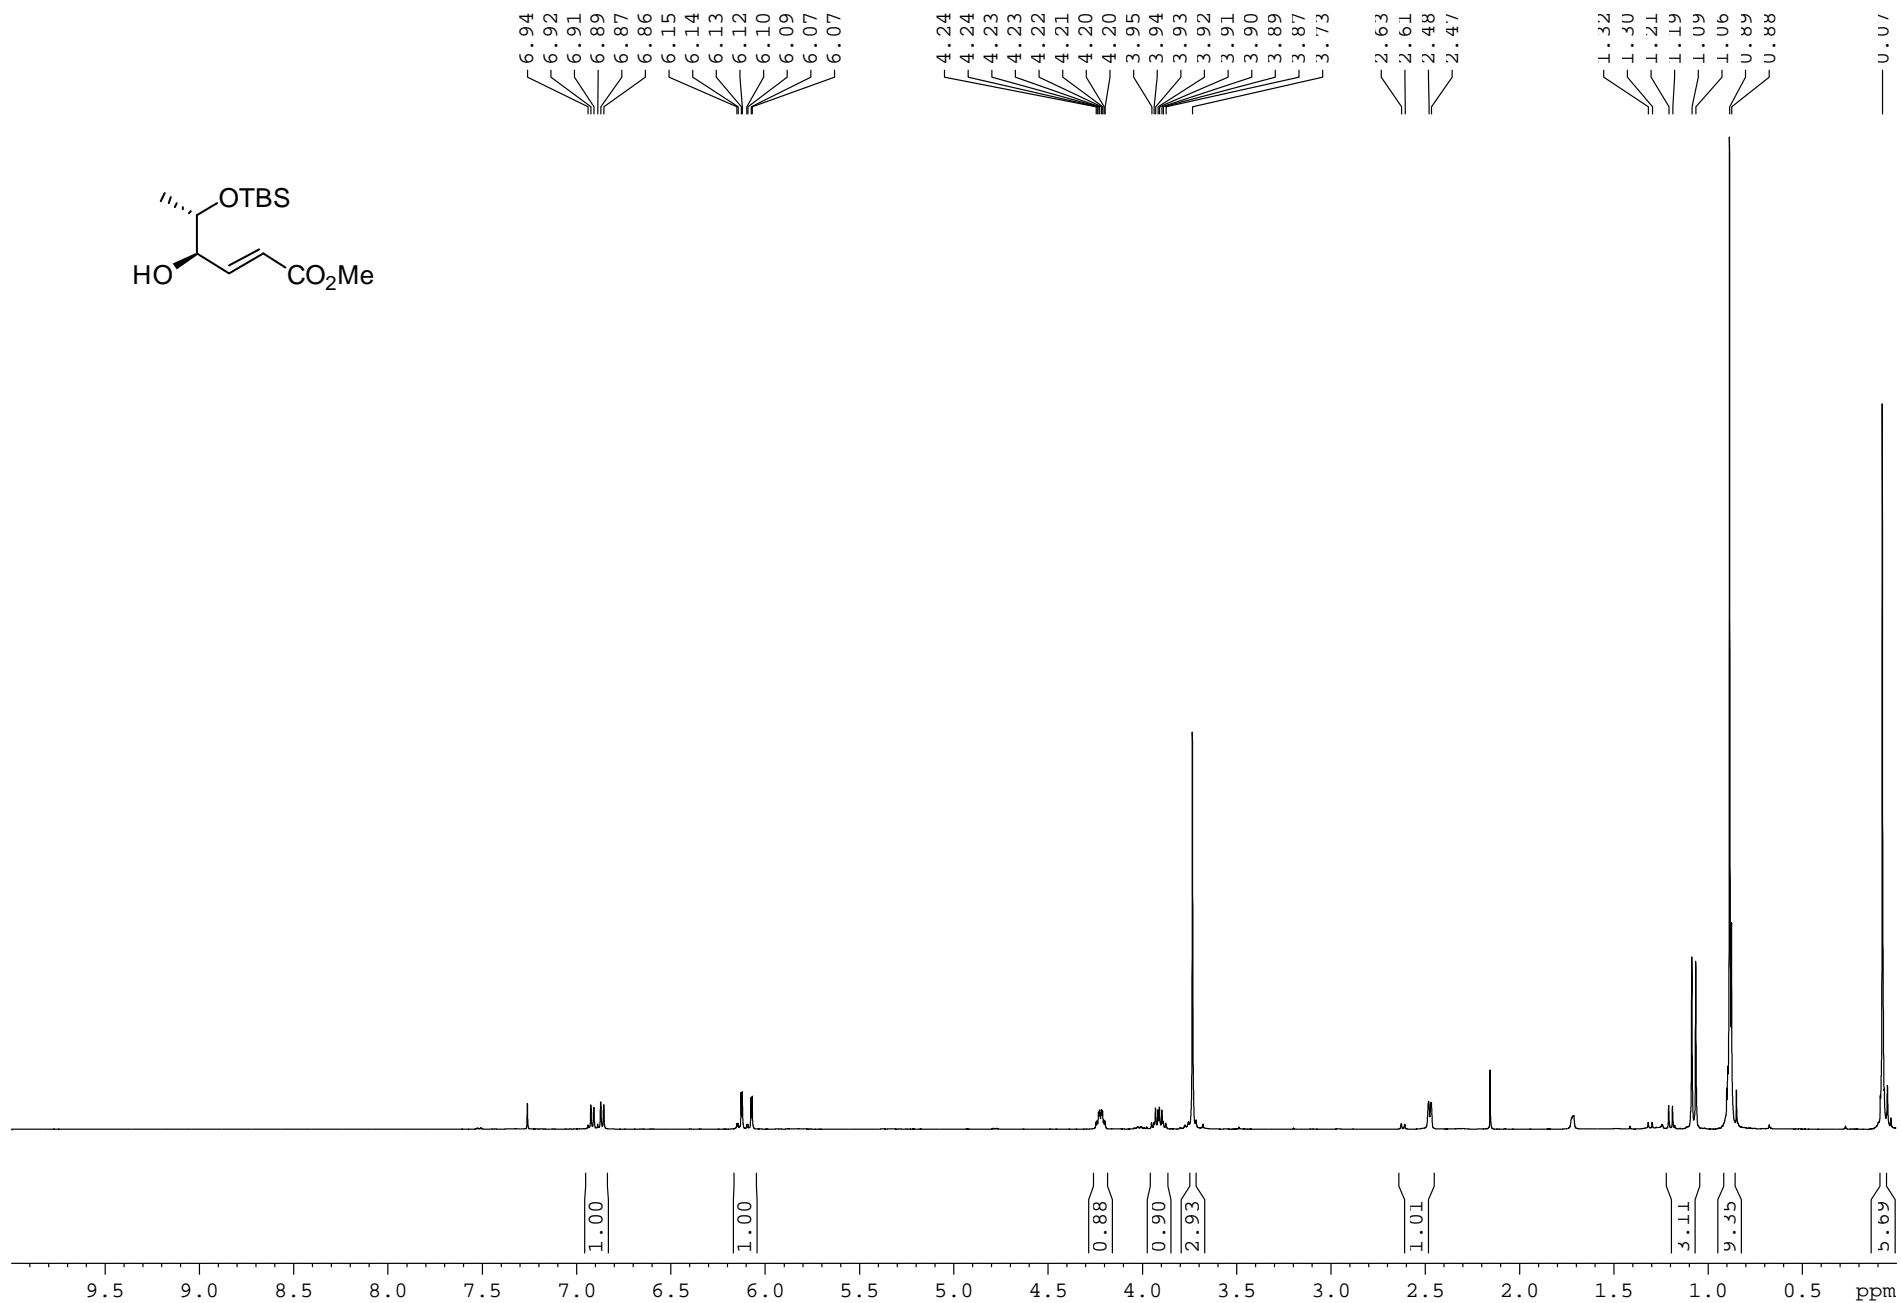

$^{13}\text{C}$  NMR-APT ( $\text{CDCl}_3$ , 75 MHz) of **5a**

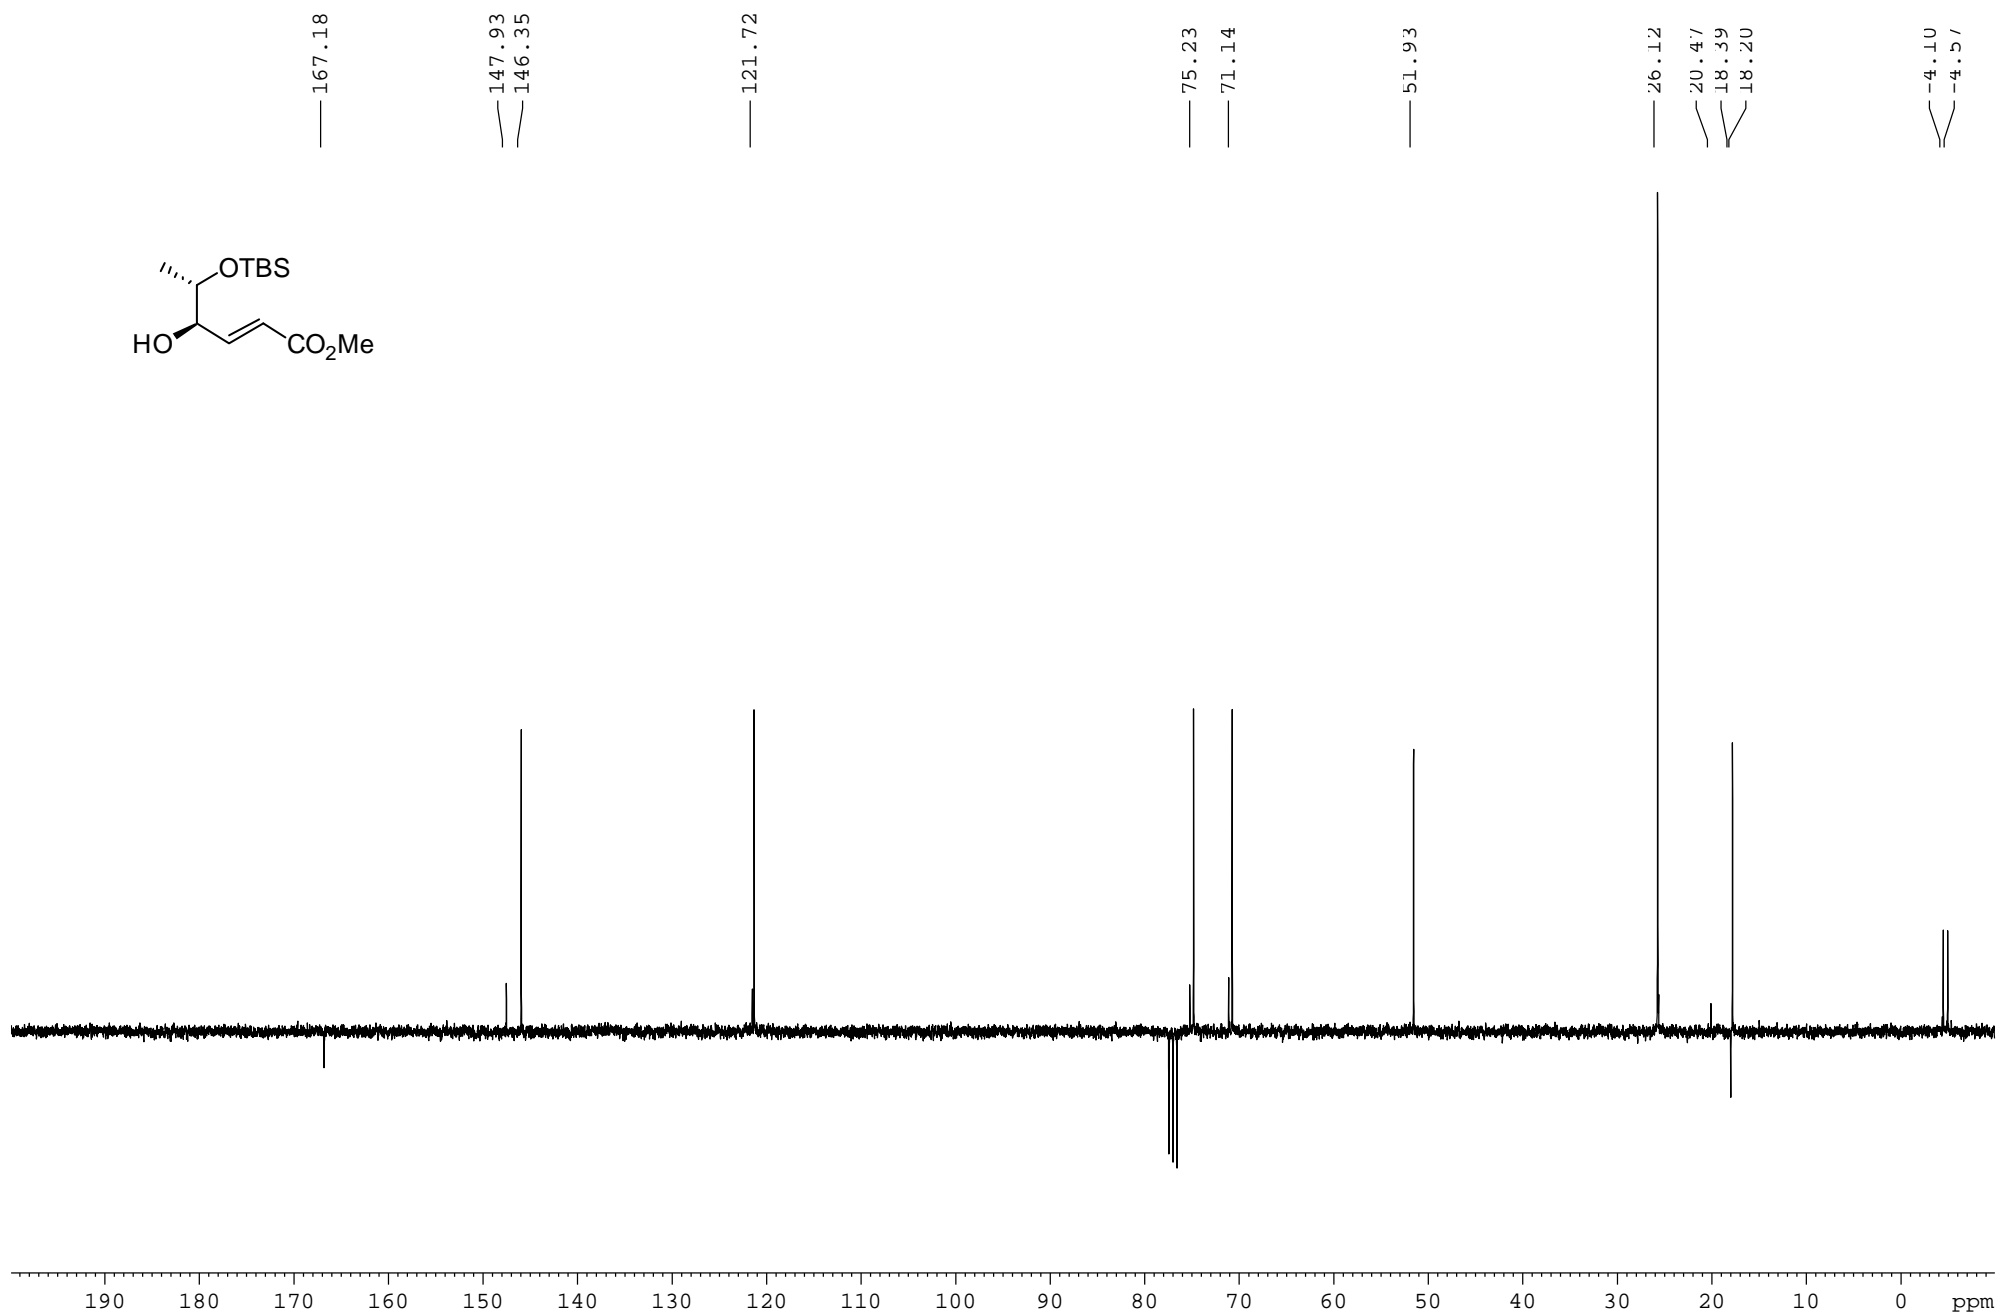

$^1\text{H}$  NMR ( $\text{CDCl}_3$ , 300 MHz) of **5b**

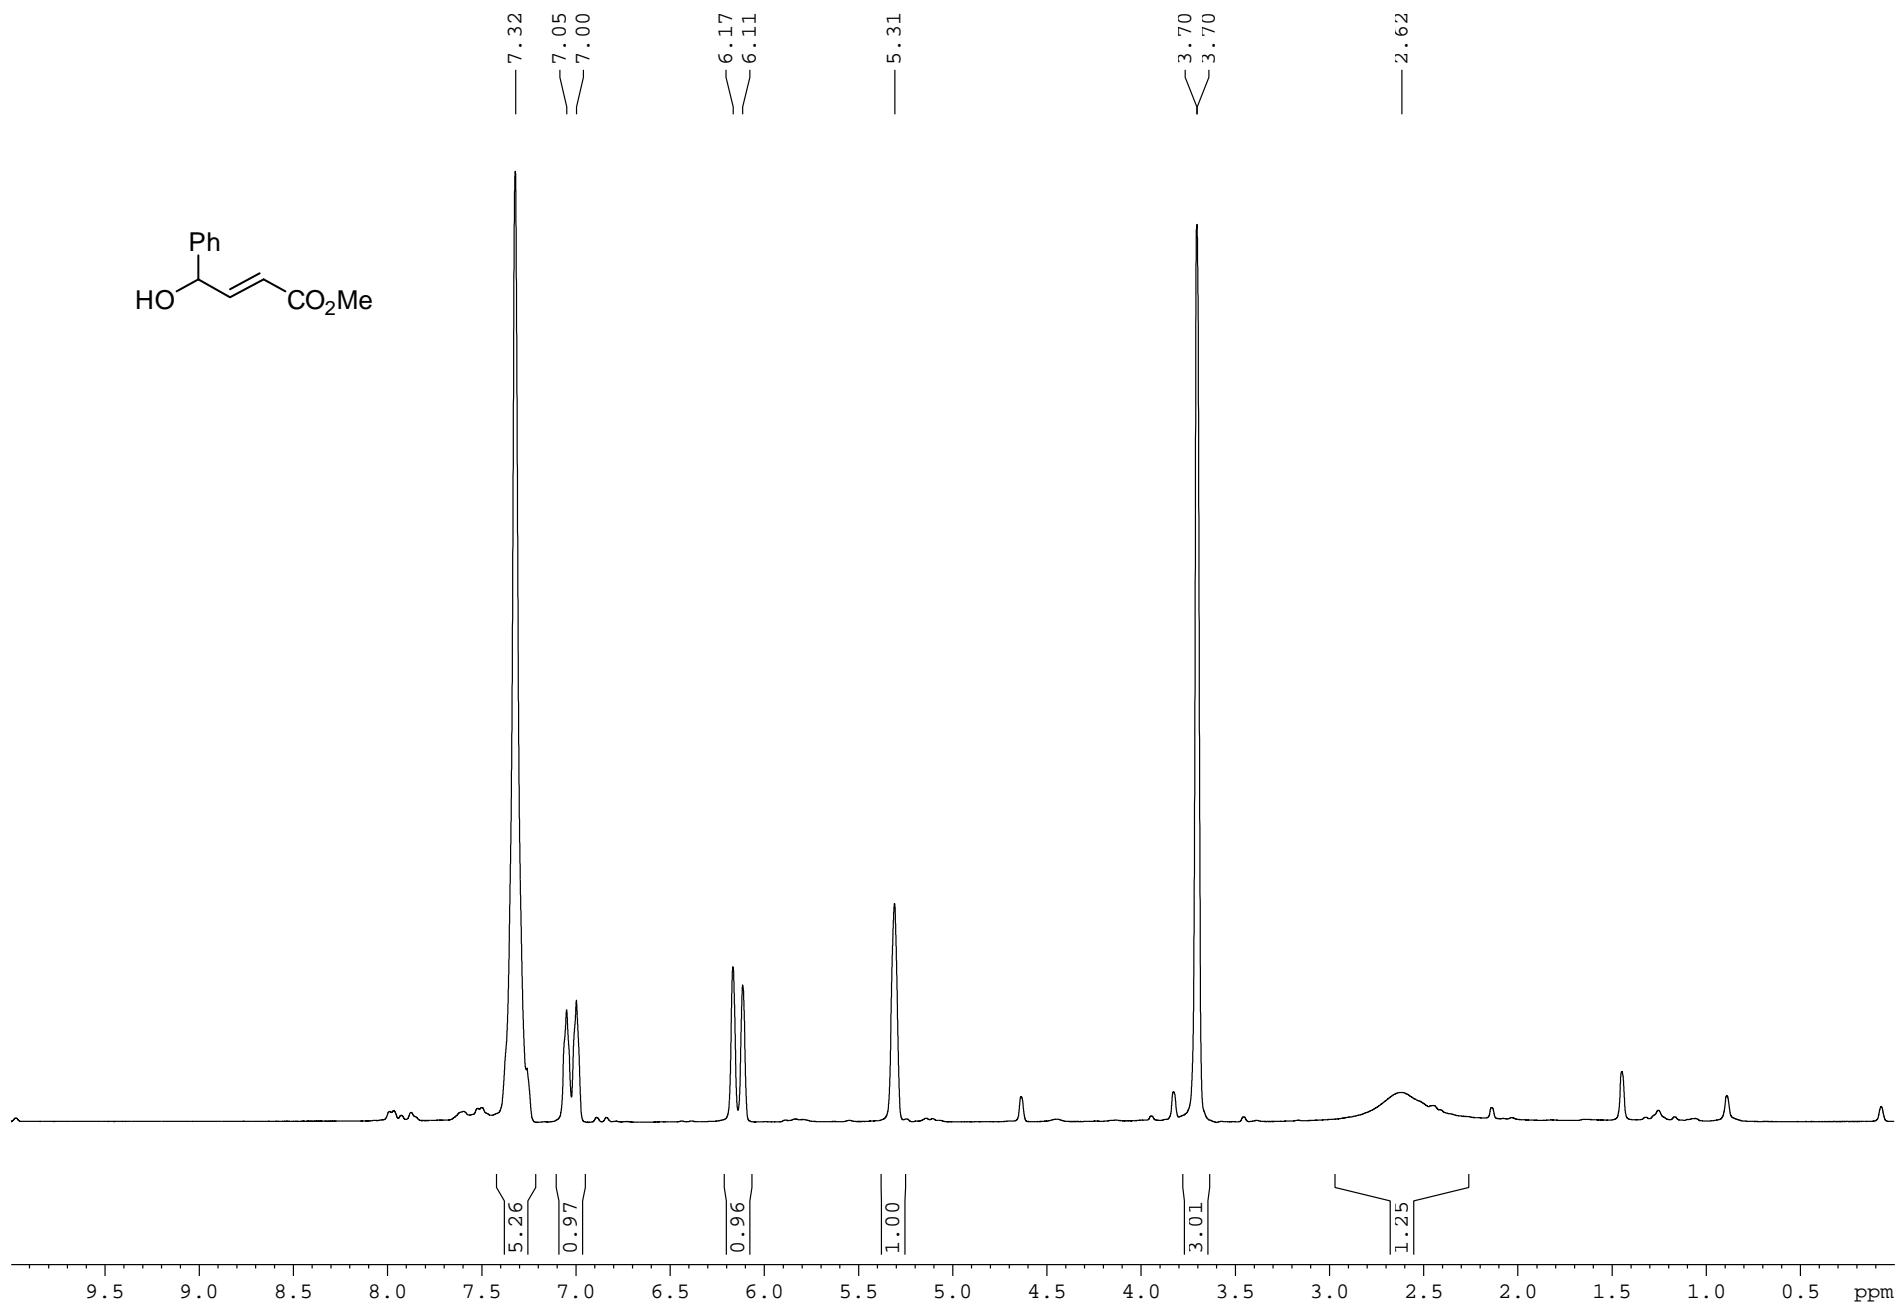



$^{13}\text{C}$  NMR-APT ( $\text{CDCl}_3$ , 75 MHz) of **5b**

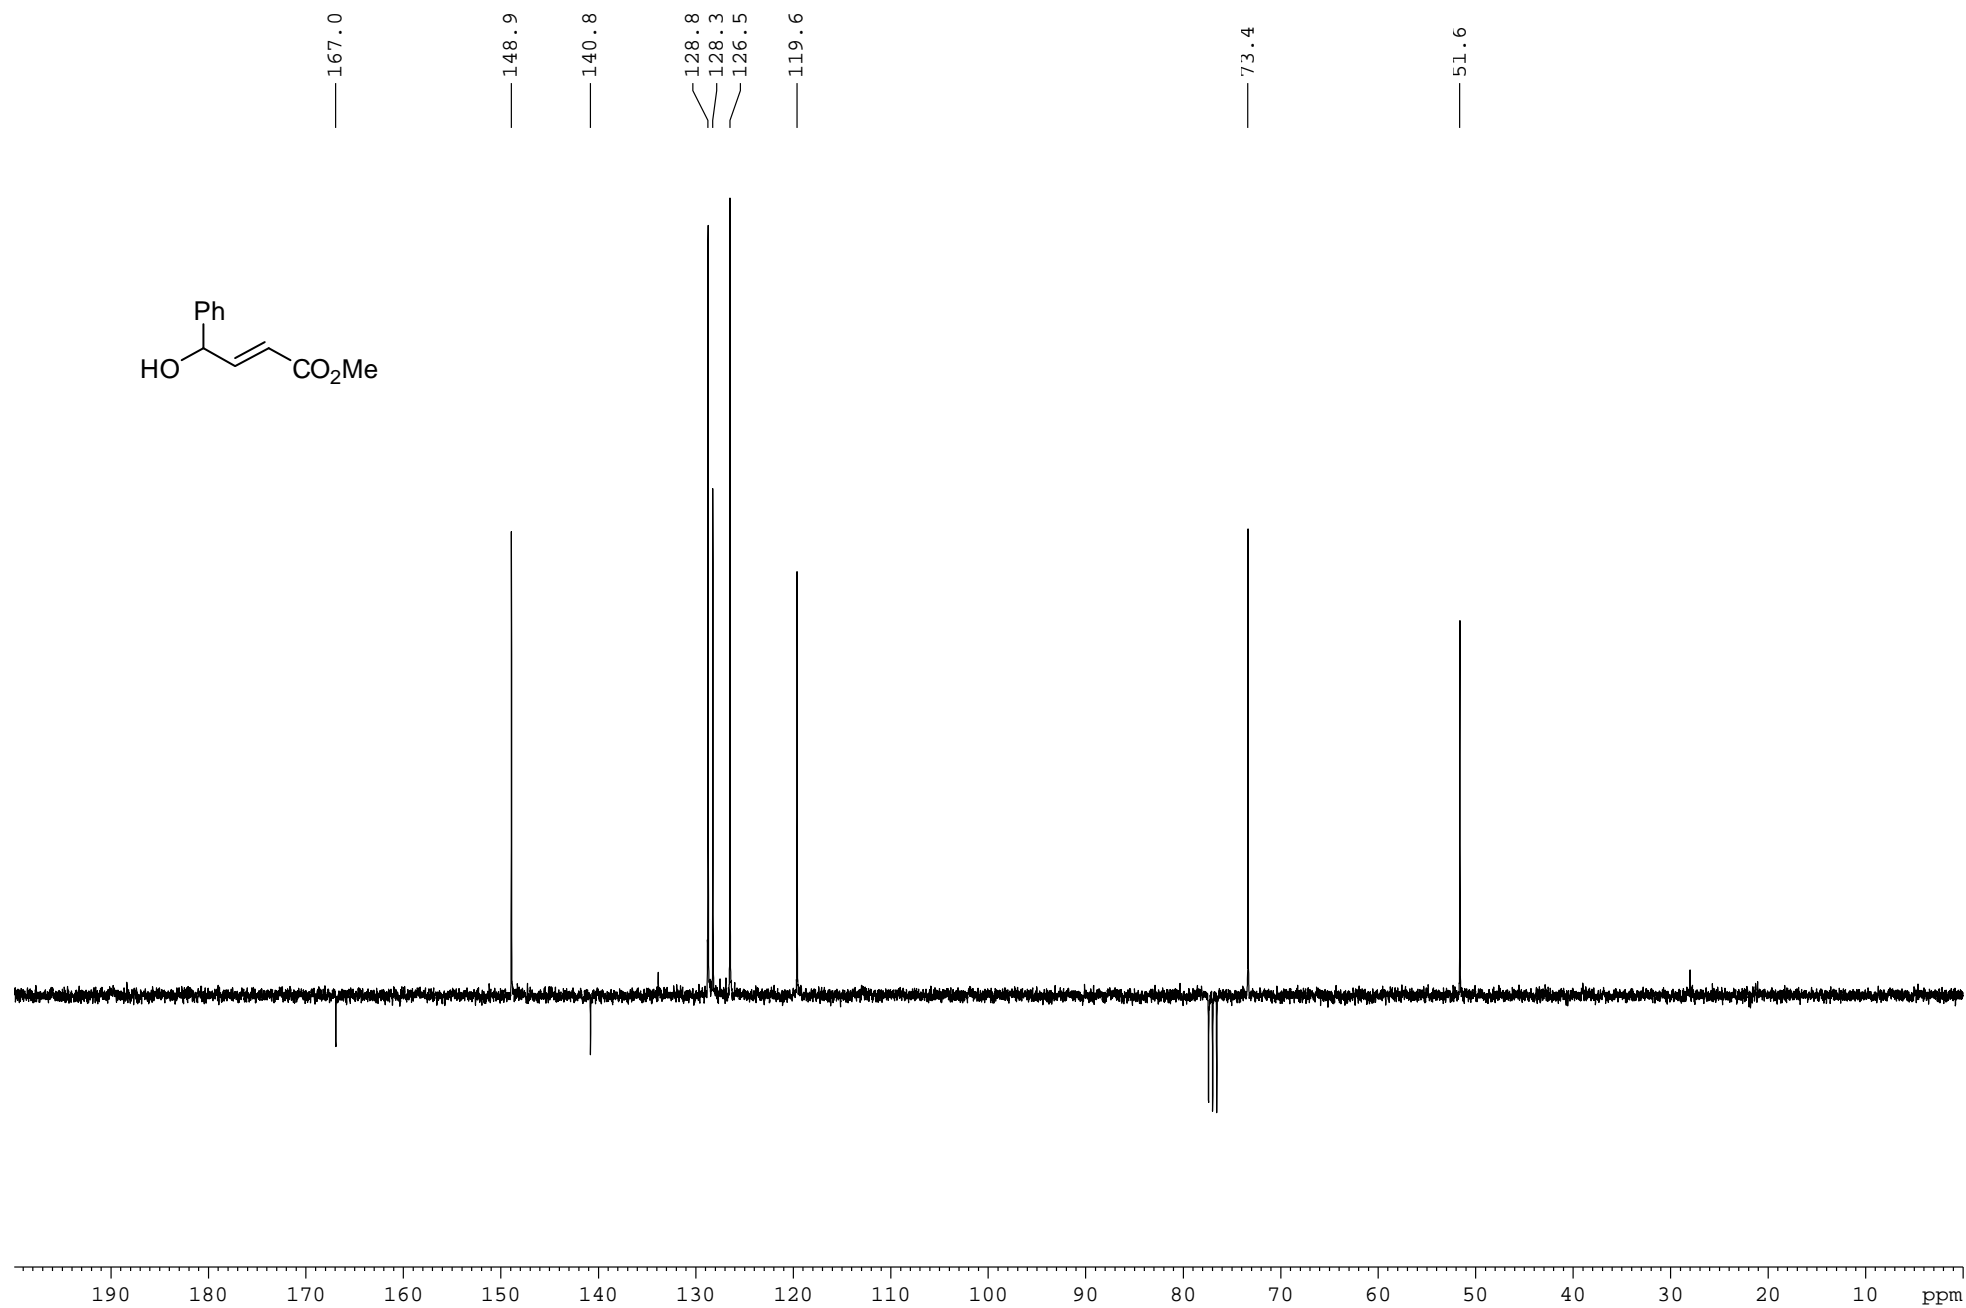

$^1\text{H}$  NMR ( $\text{CDCl}_3$ , 300 MHz) of **5c**

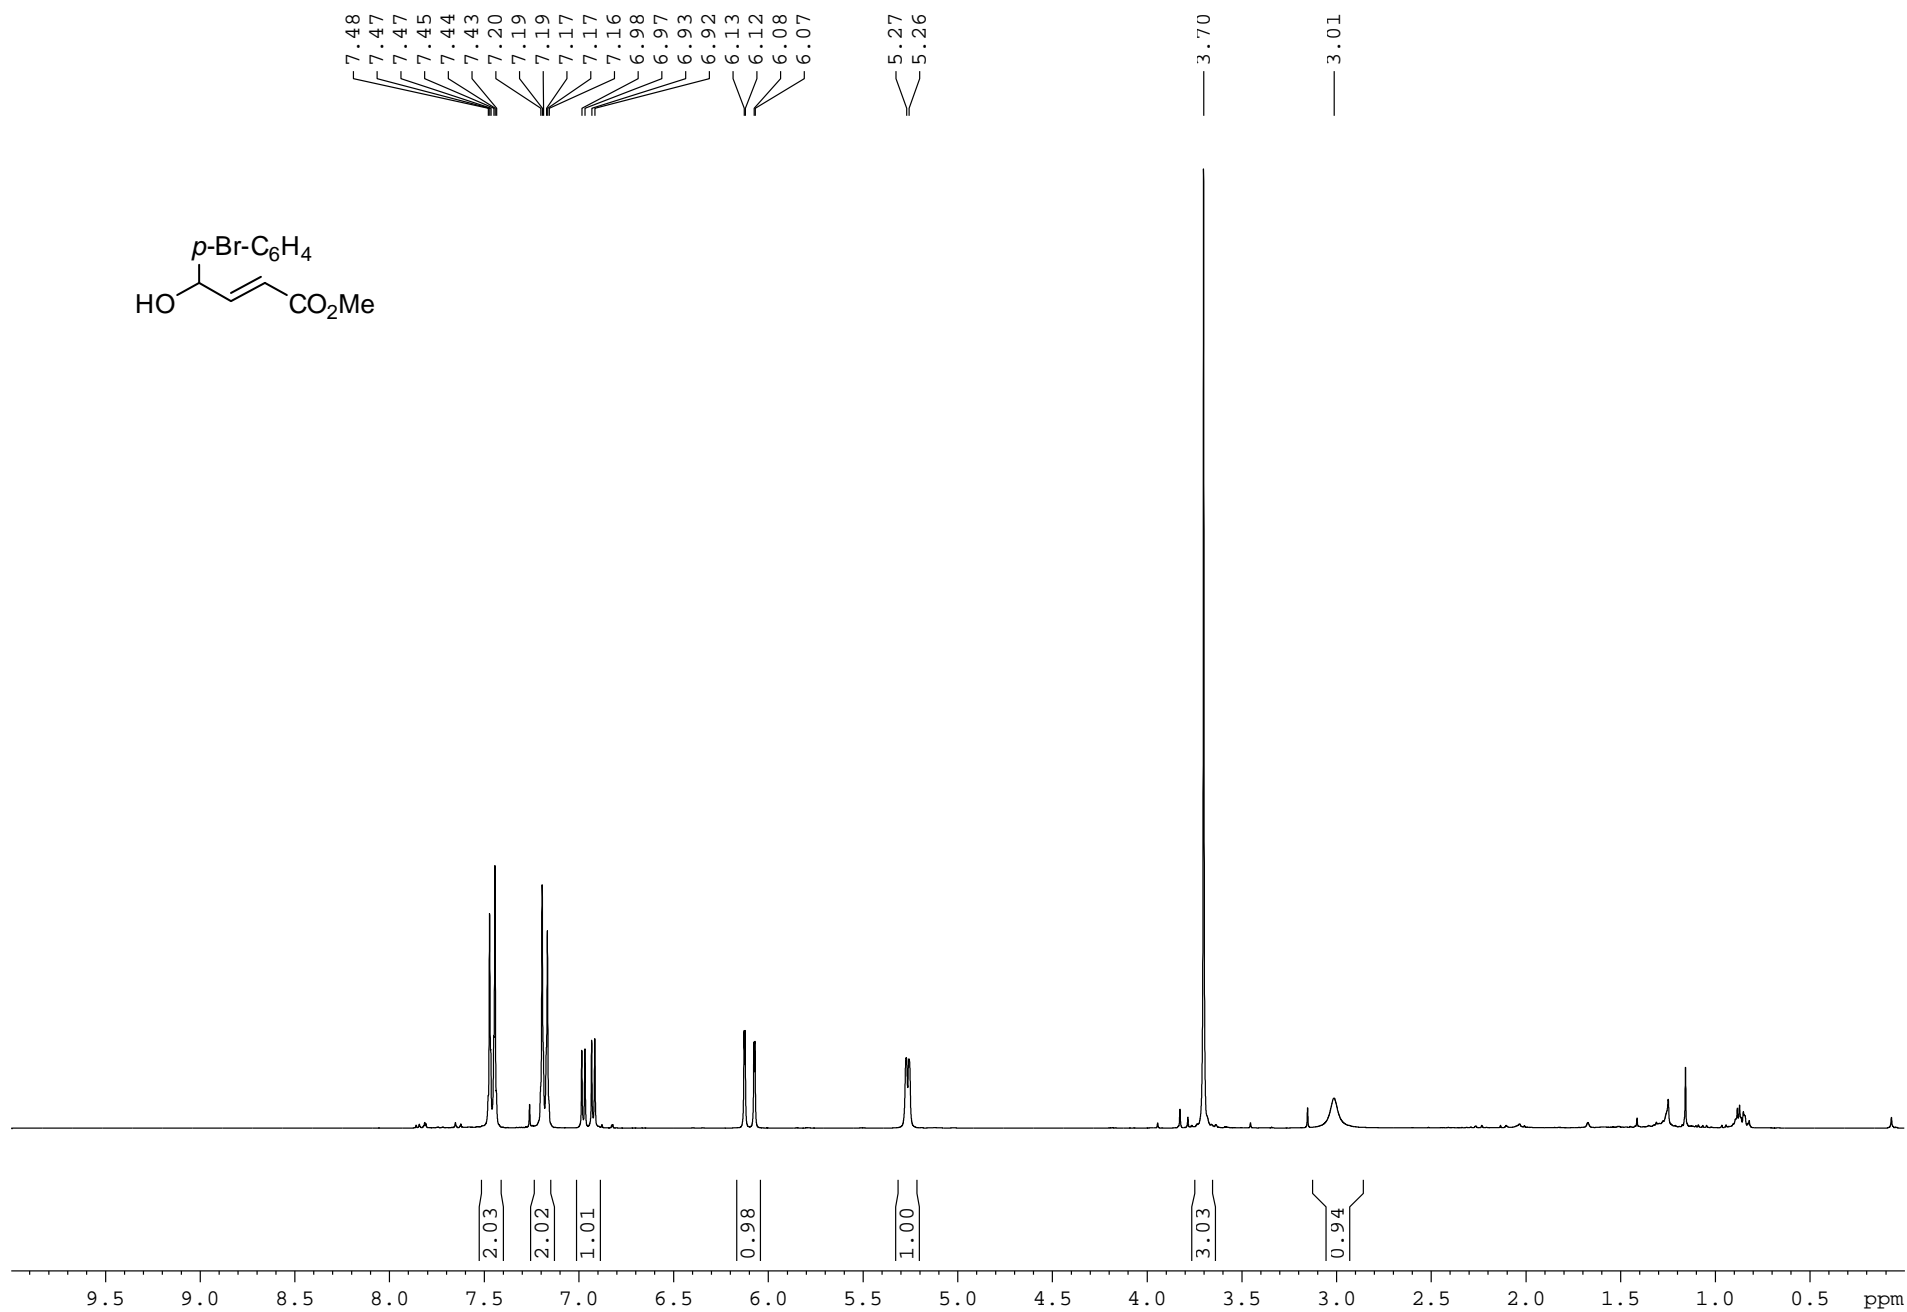

$^{13}\text{C}$  NMR-APT ( $\text{CDCl}_3$ , 75 MHz) of **5c**

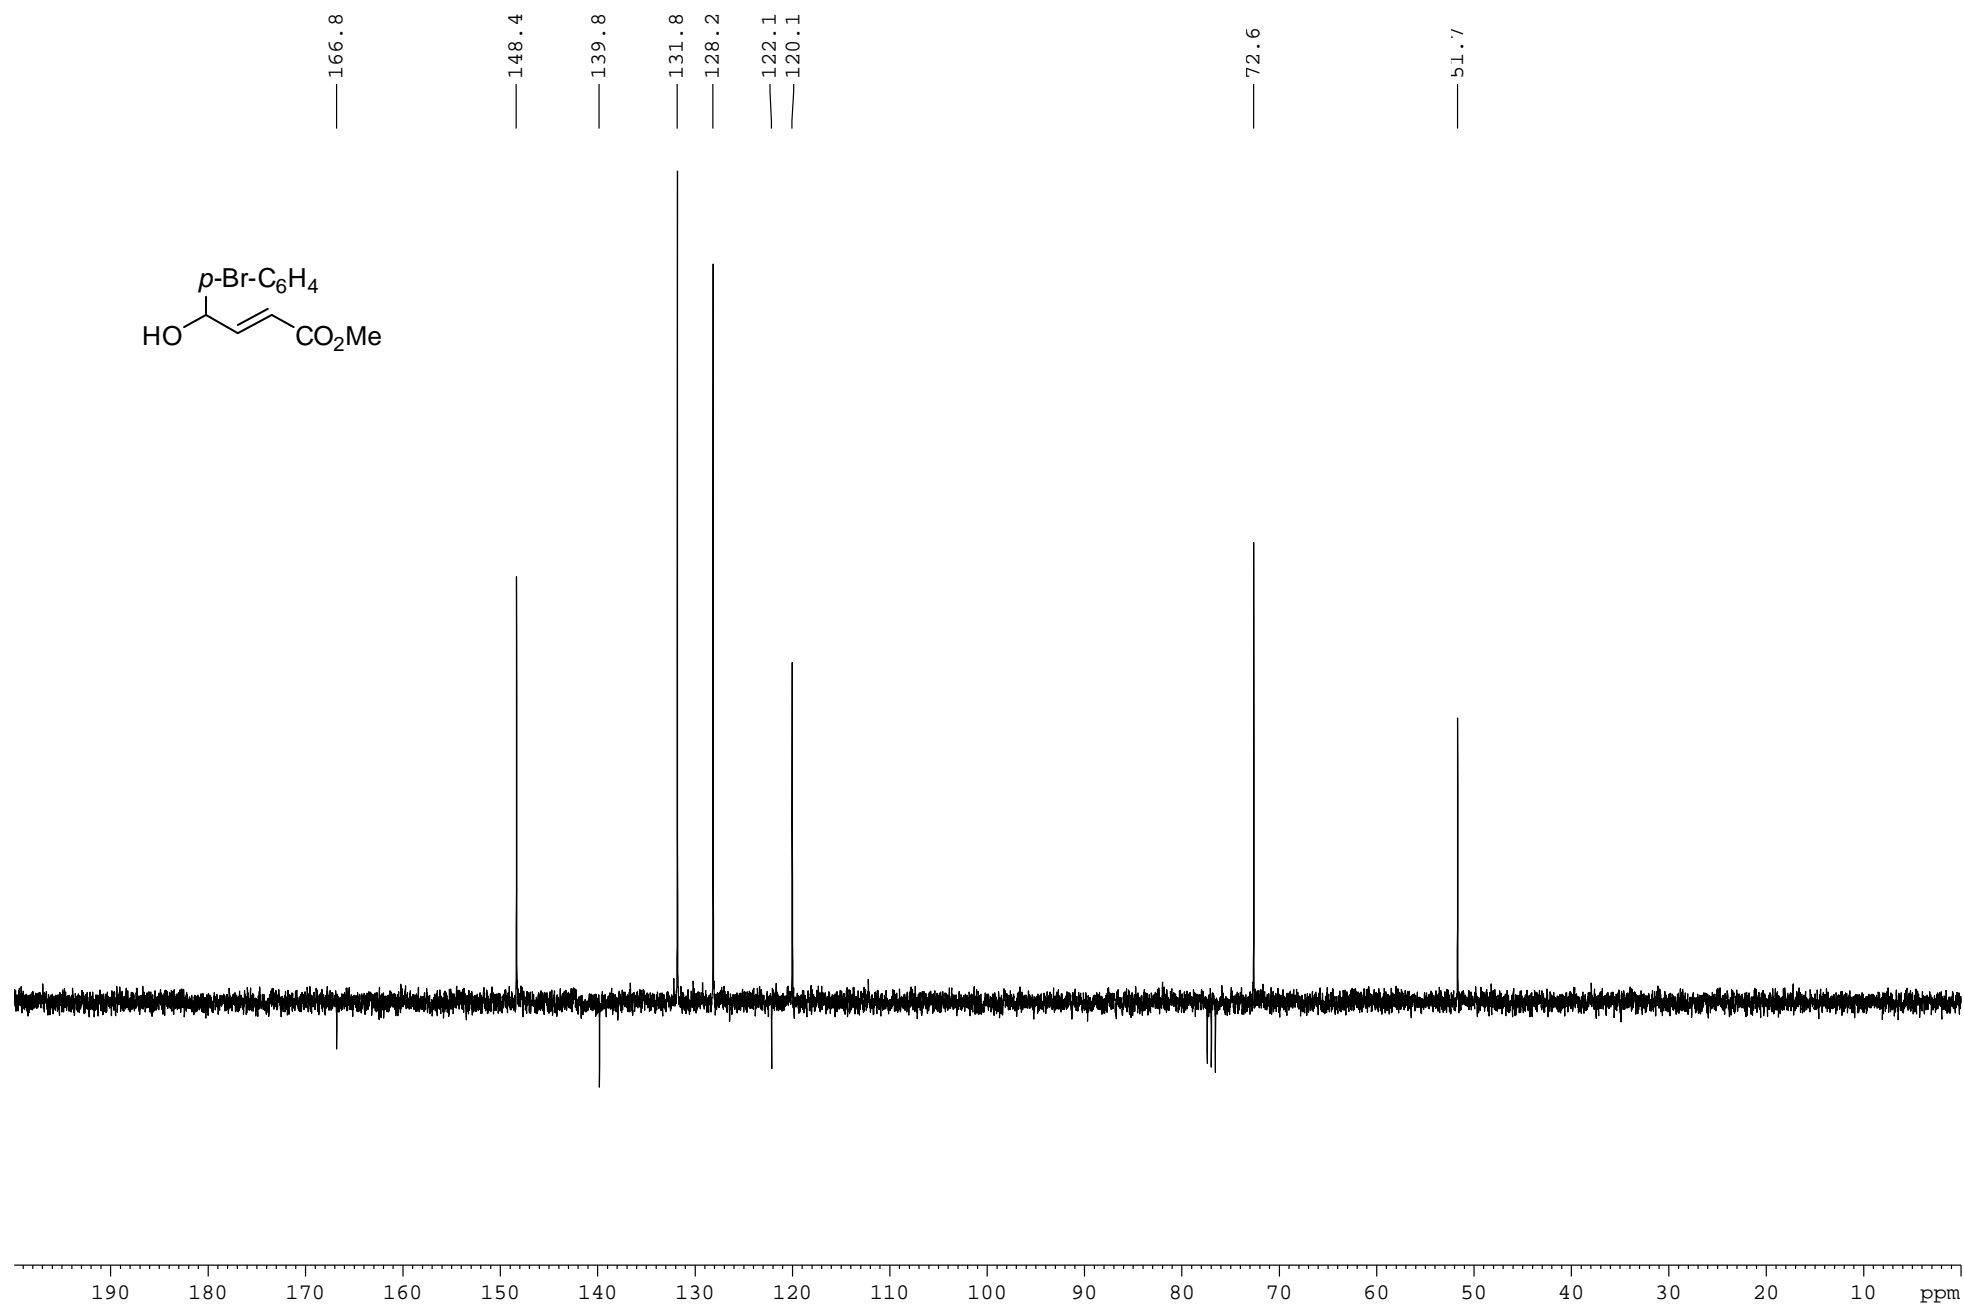

$^1\text{H}$  NMR ( $\text{CDCl}_3$ , 300 MHz) of **5d**

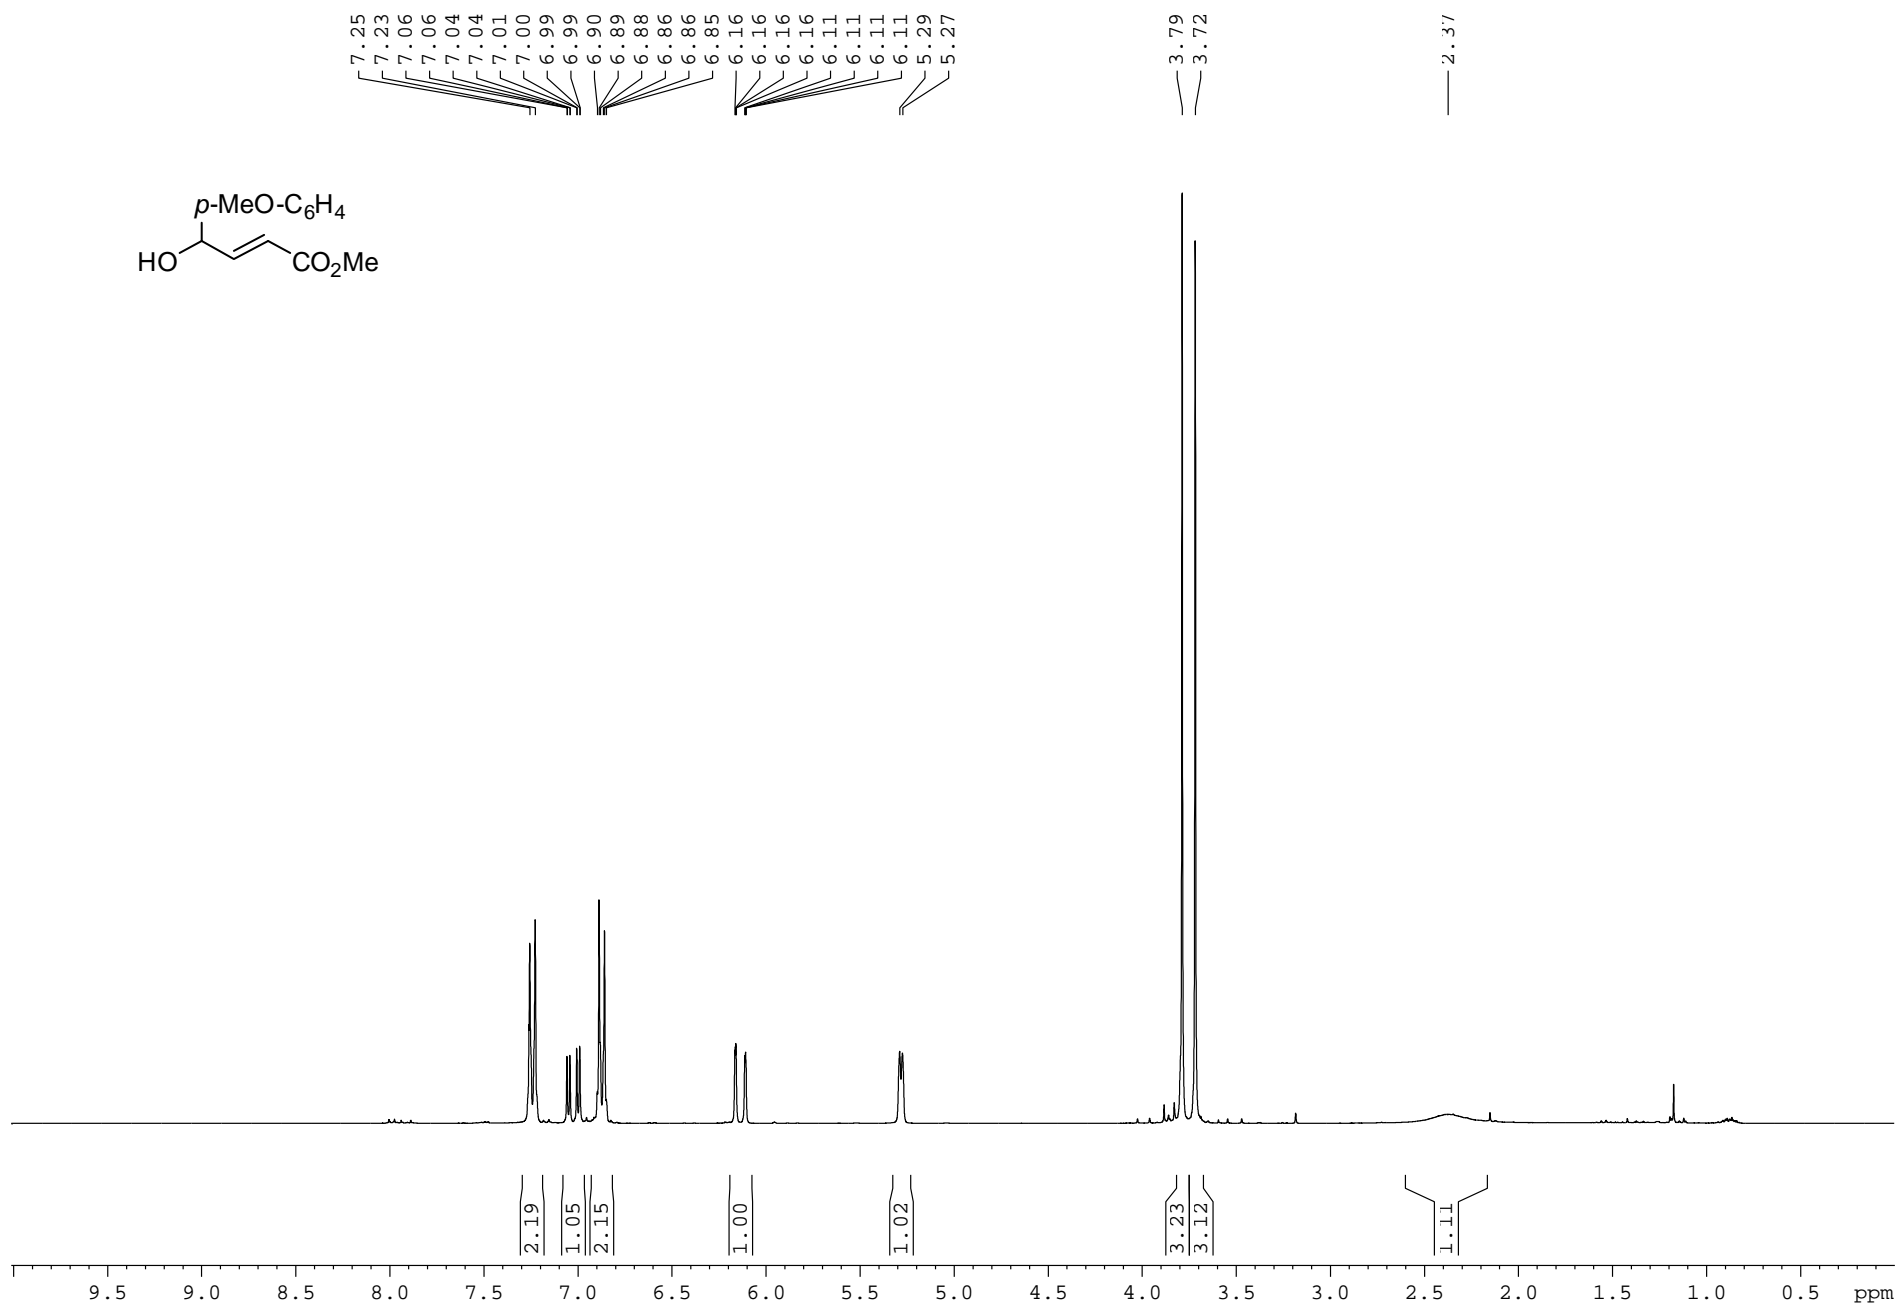

$^{13}\text{C}$  NMR-APT ( $\text{CDCl}_3$ , 75 MHz) of **5d**

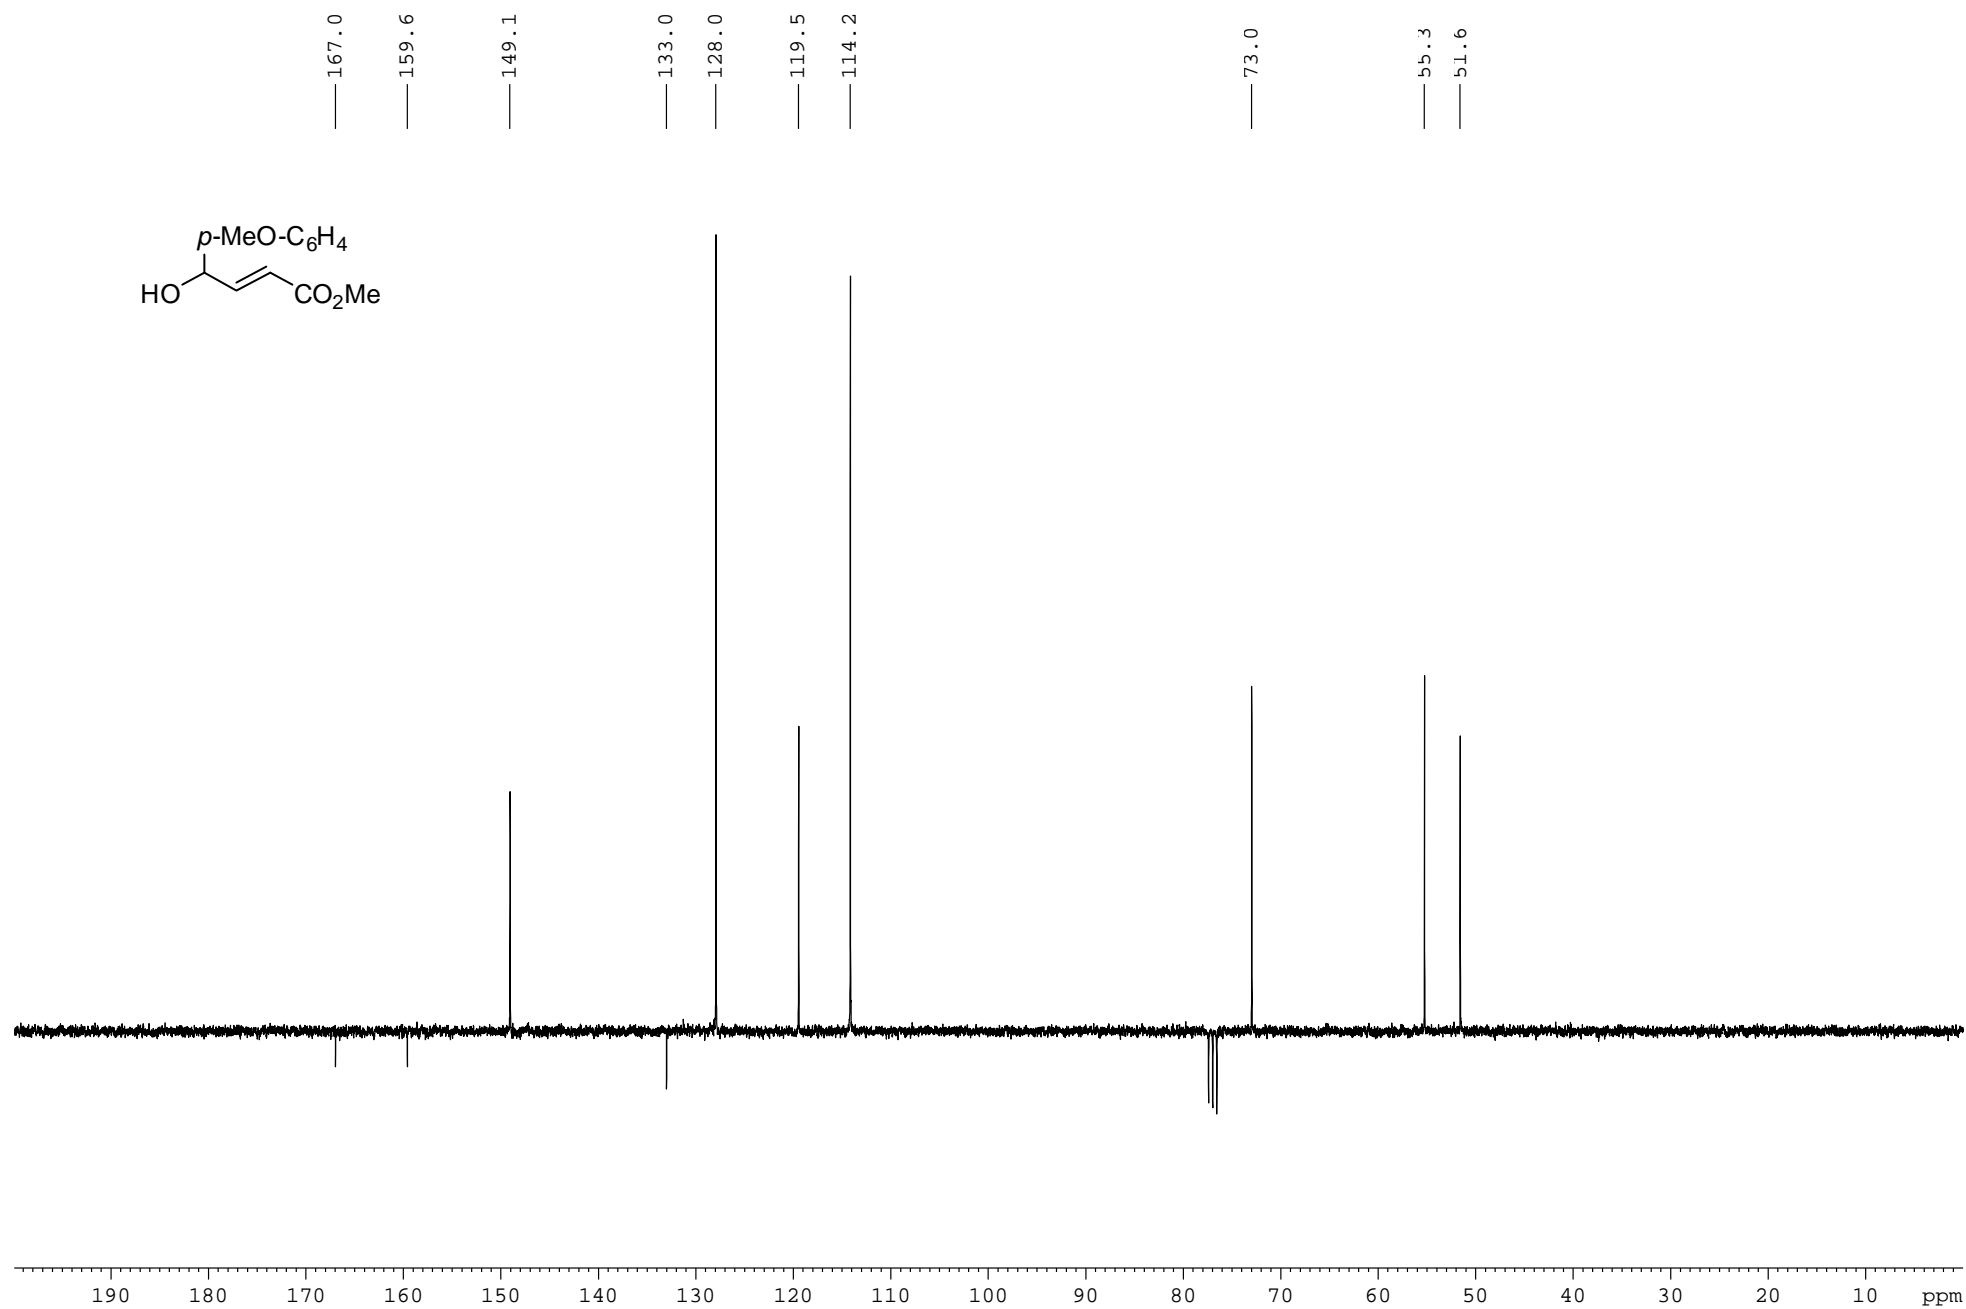

$^1\text{H}$  NMR ( $\text{CDCl}_3$  + drop of aceton- $\text{d}_6$ , 300 MHz) of **5e**

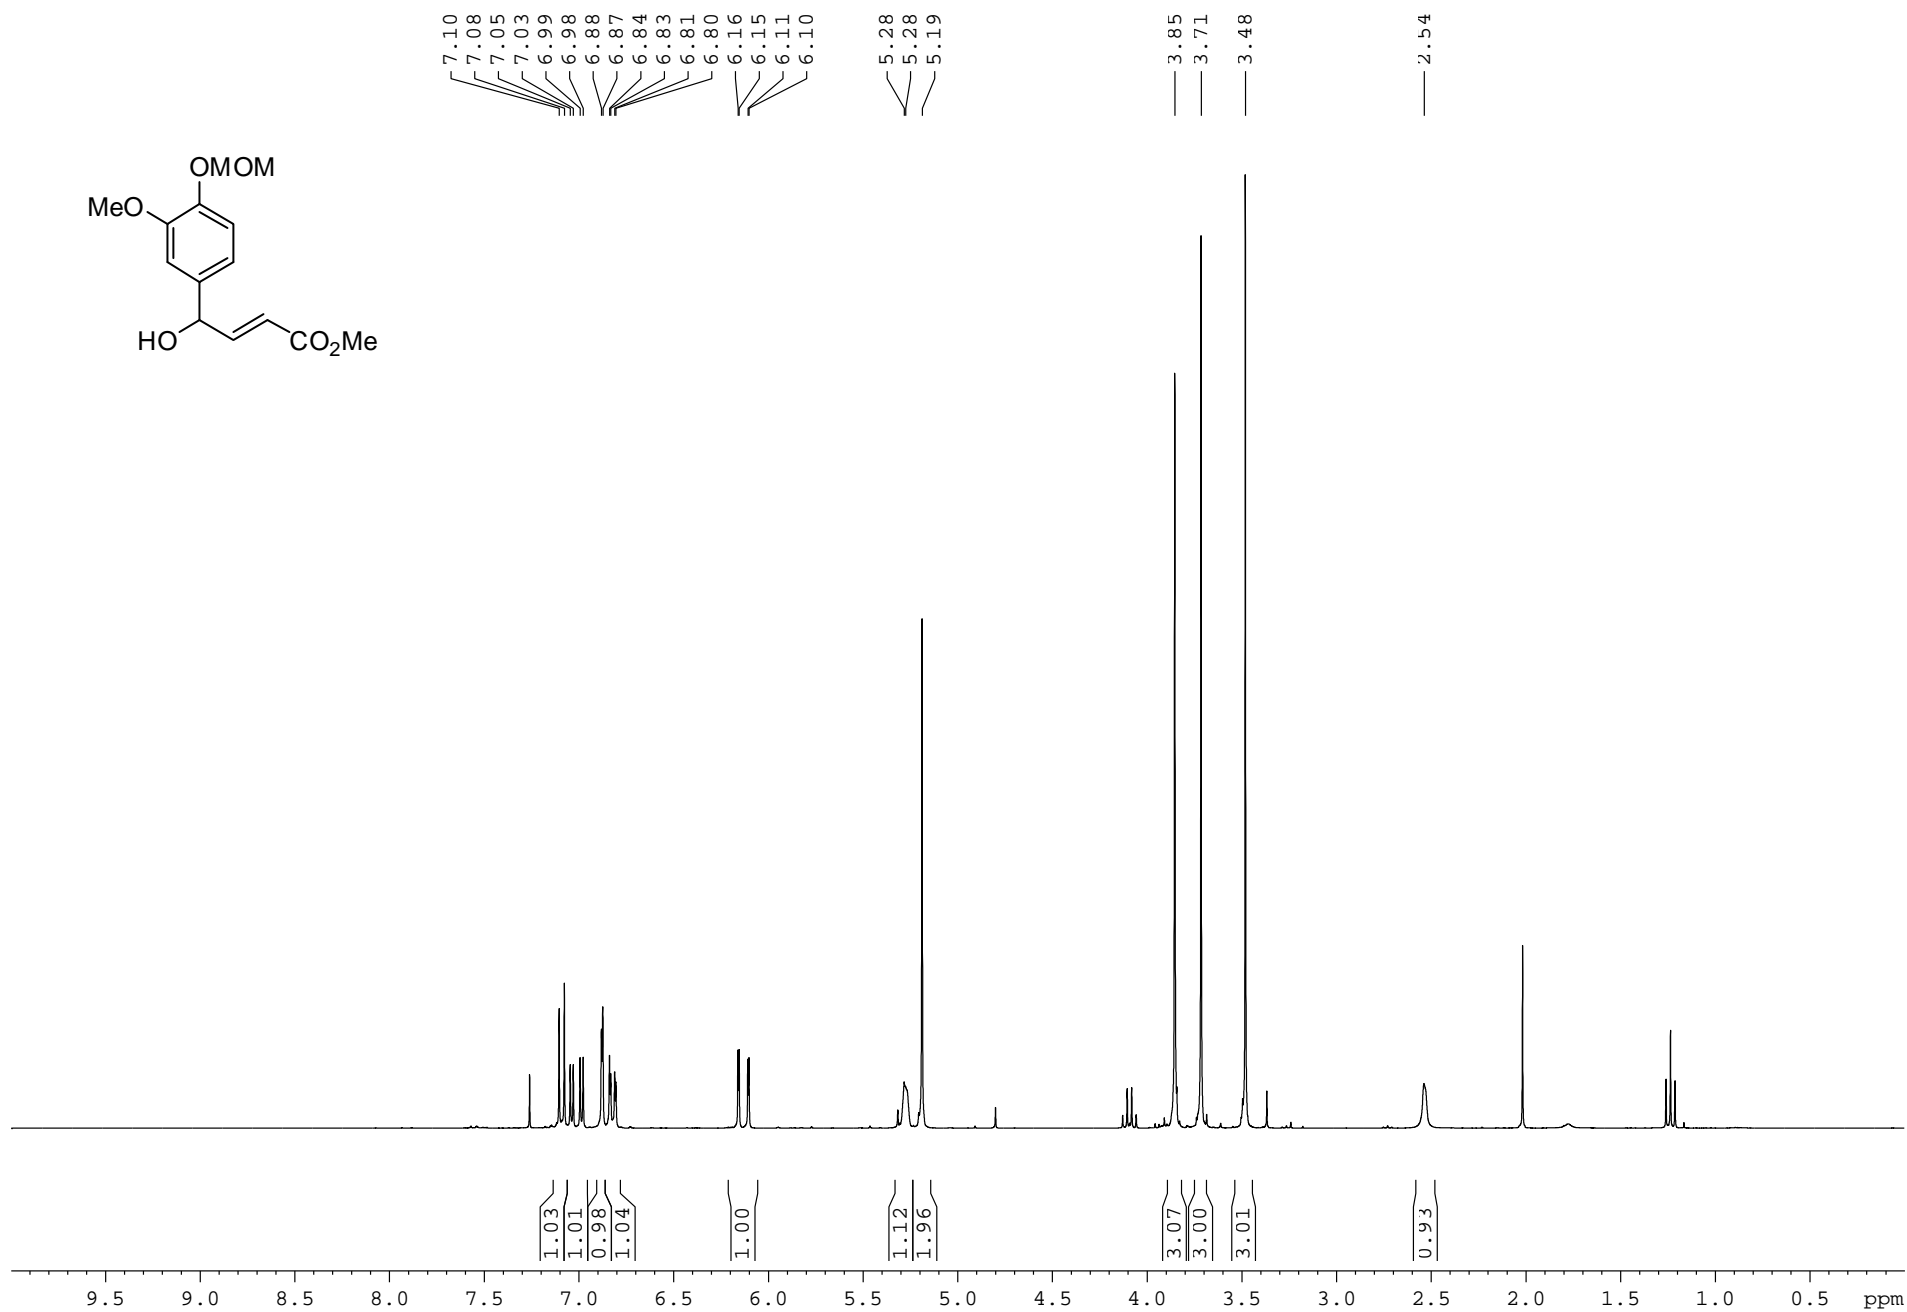

$^{13}\text{C}$  NMR-APT ( $\text{CDCl}_3$  + drop of aceton- $\text{d}_6$ , 75 MHz) of **5e**

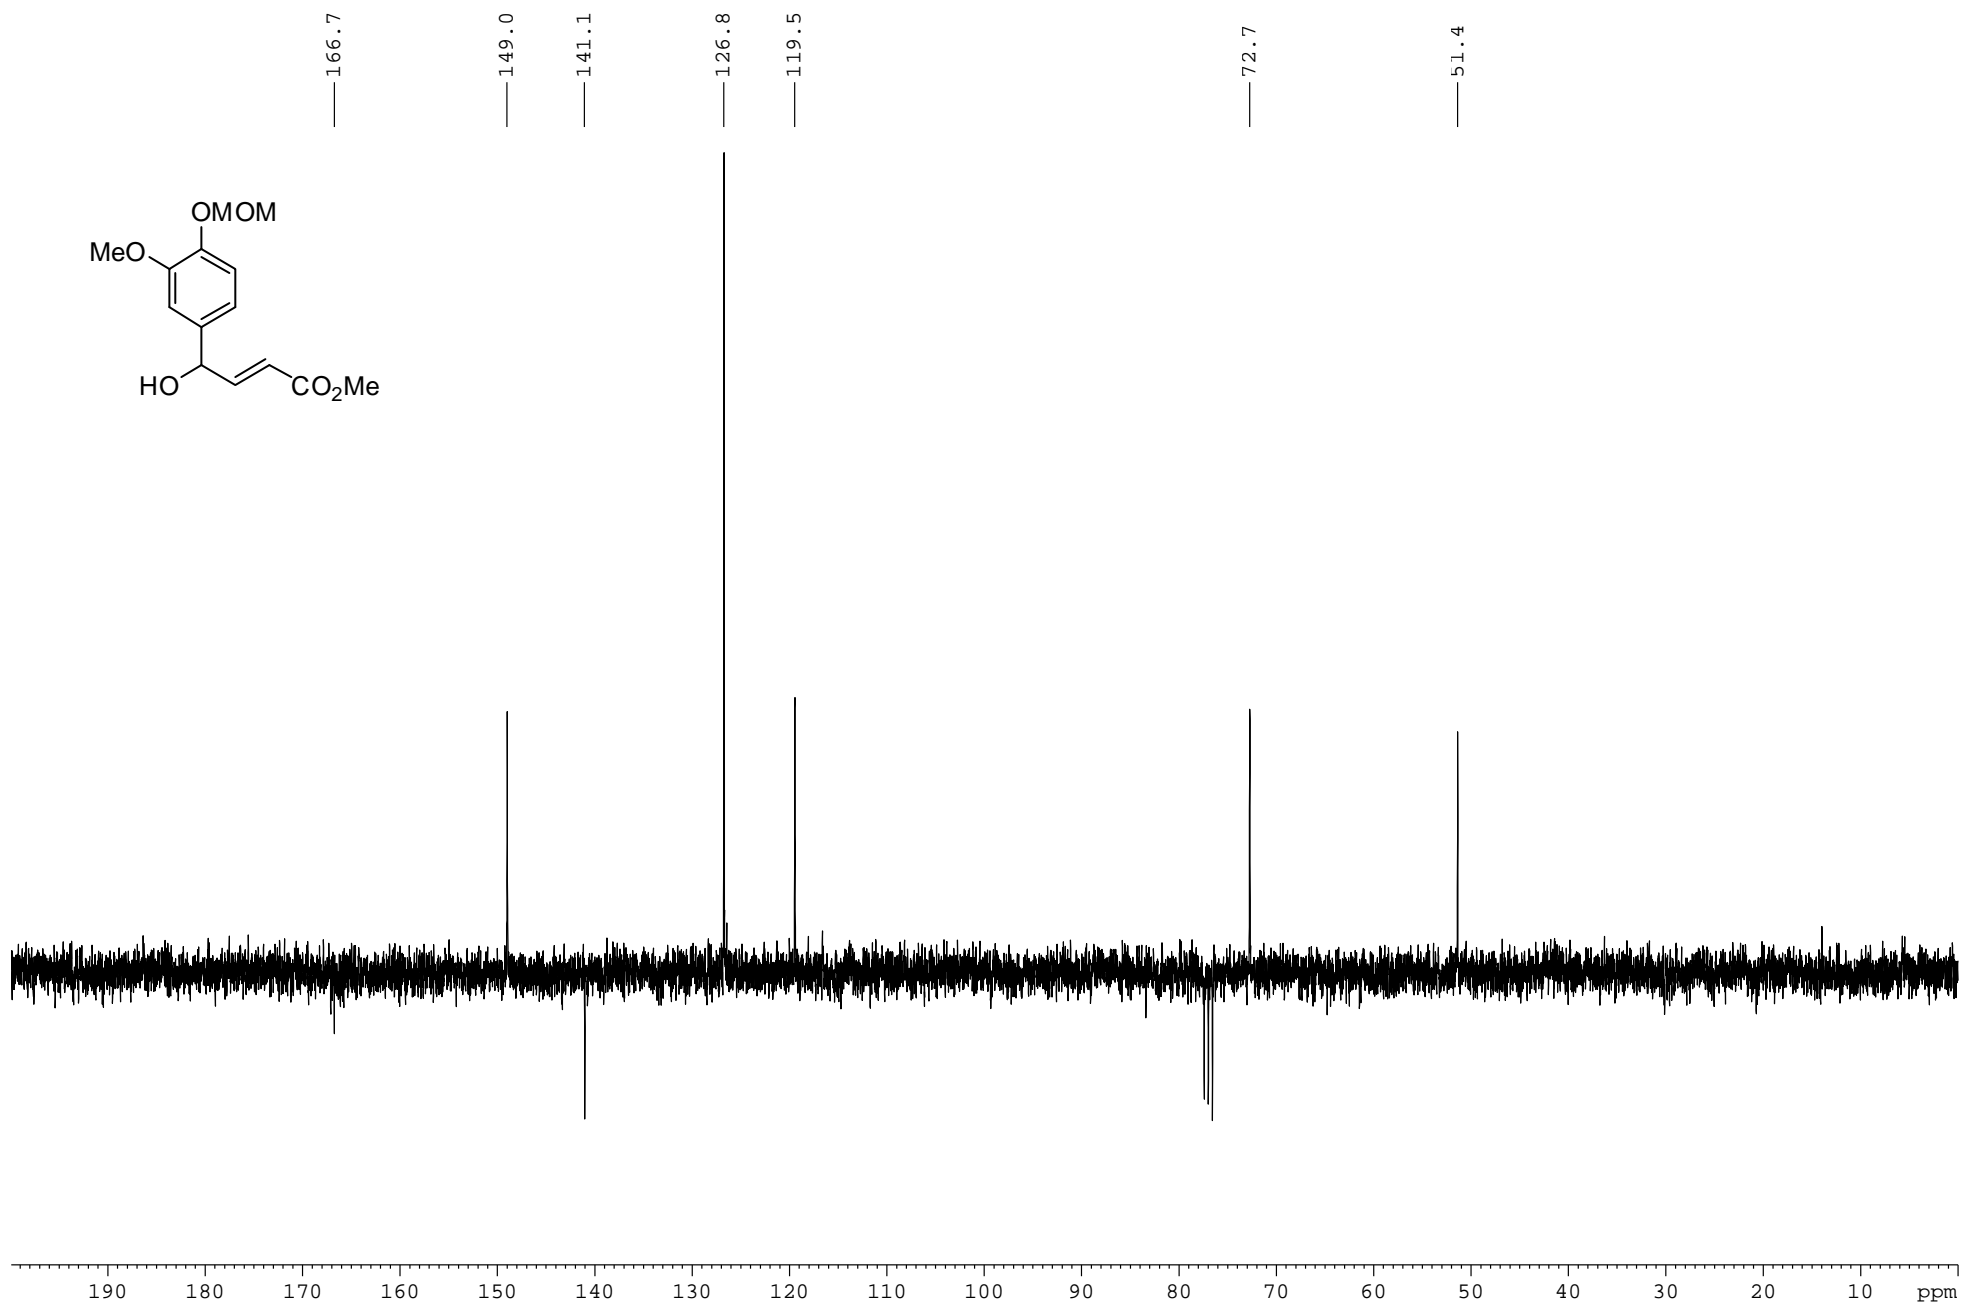

$^1\text{H}$  NMR ( $\text{CDCl}_3$ , 300 MHz) of **5f**

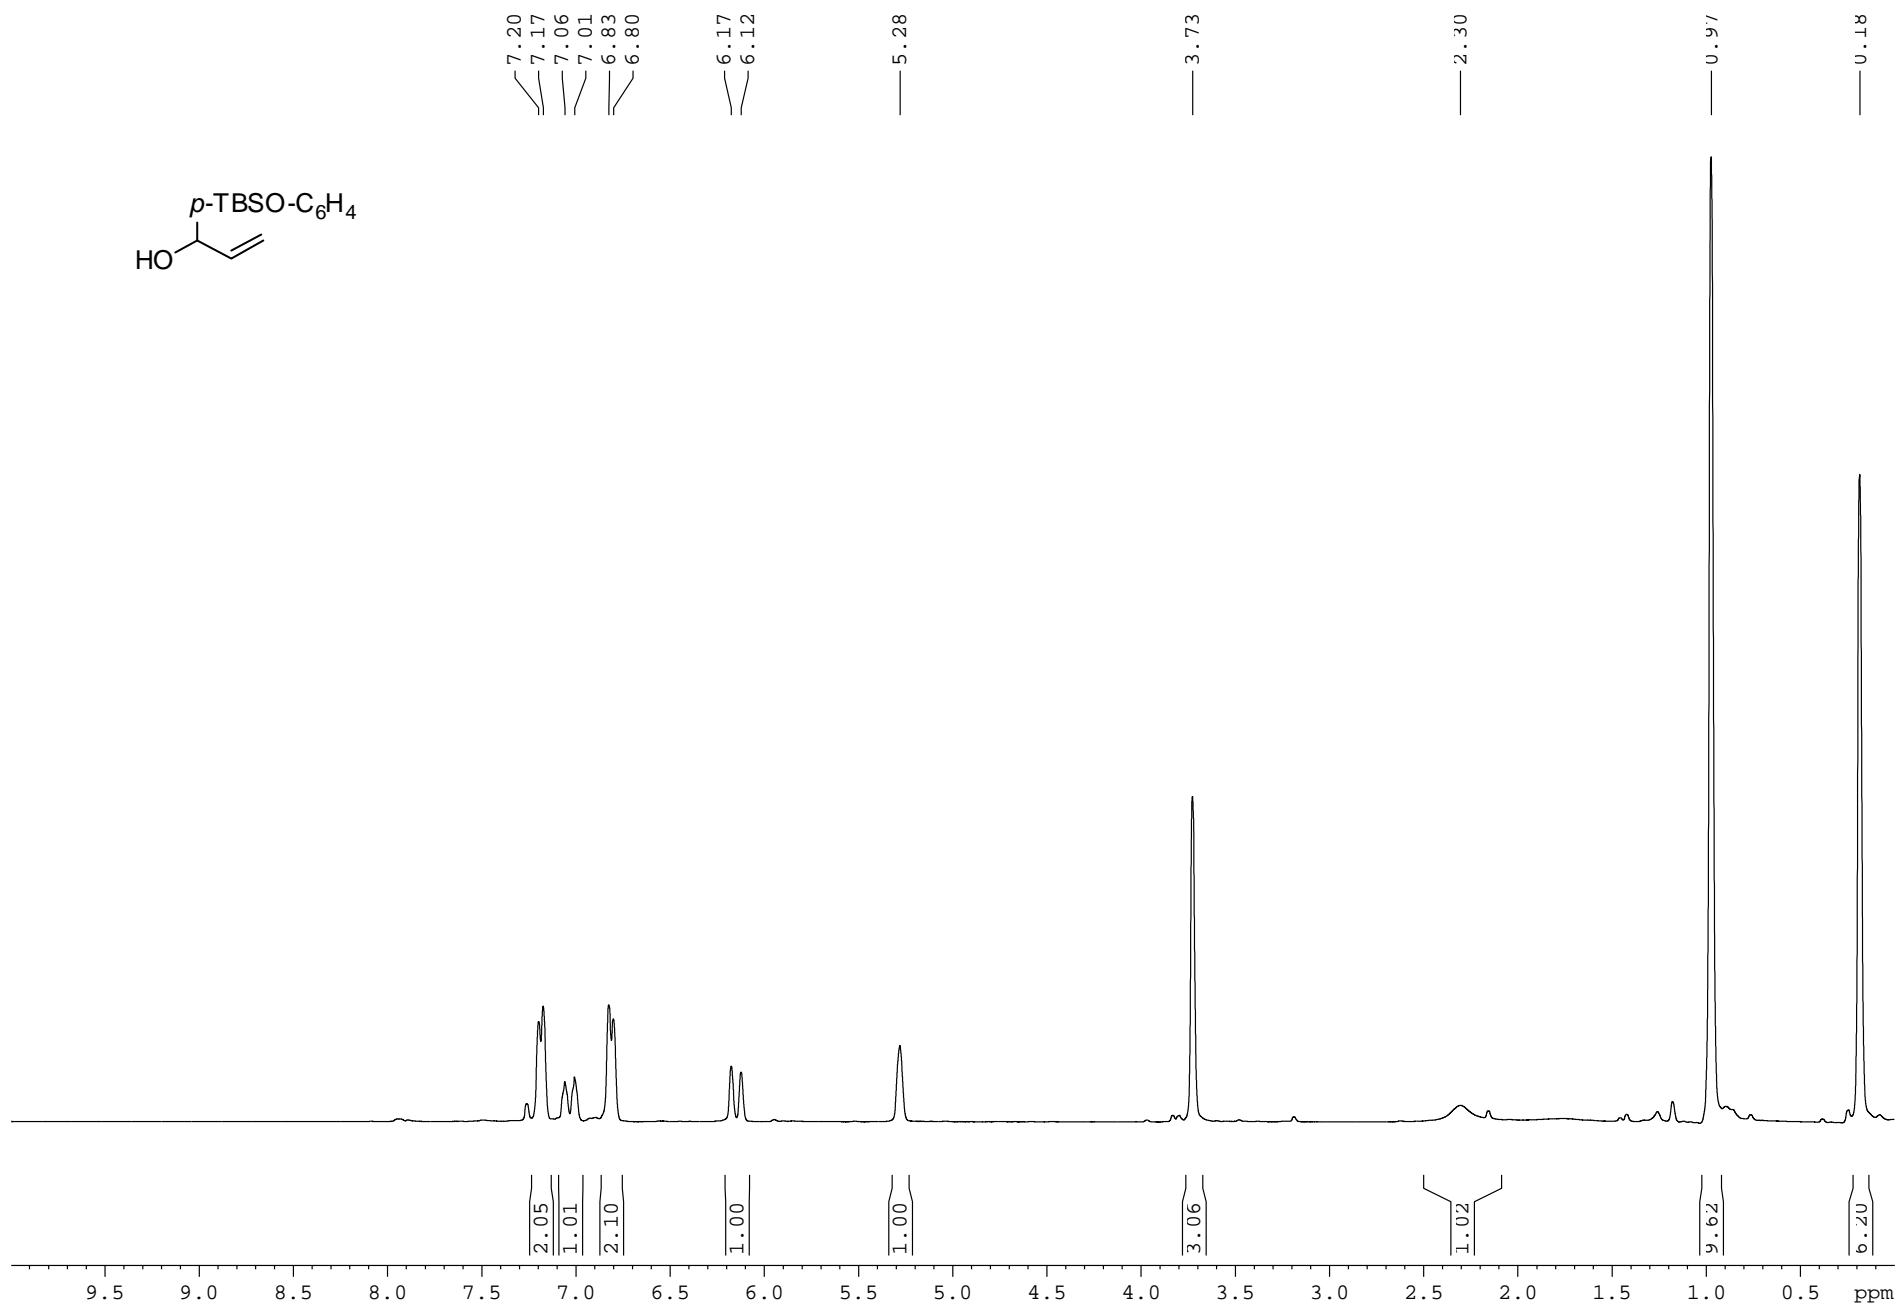



$^{13}\text{C}$  NMR-APT ( $\text{CDCl}_3$ , 75 MHz) of **5f**

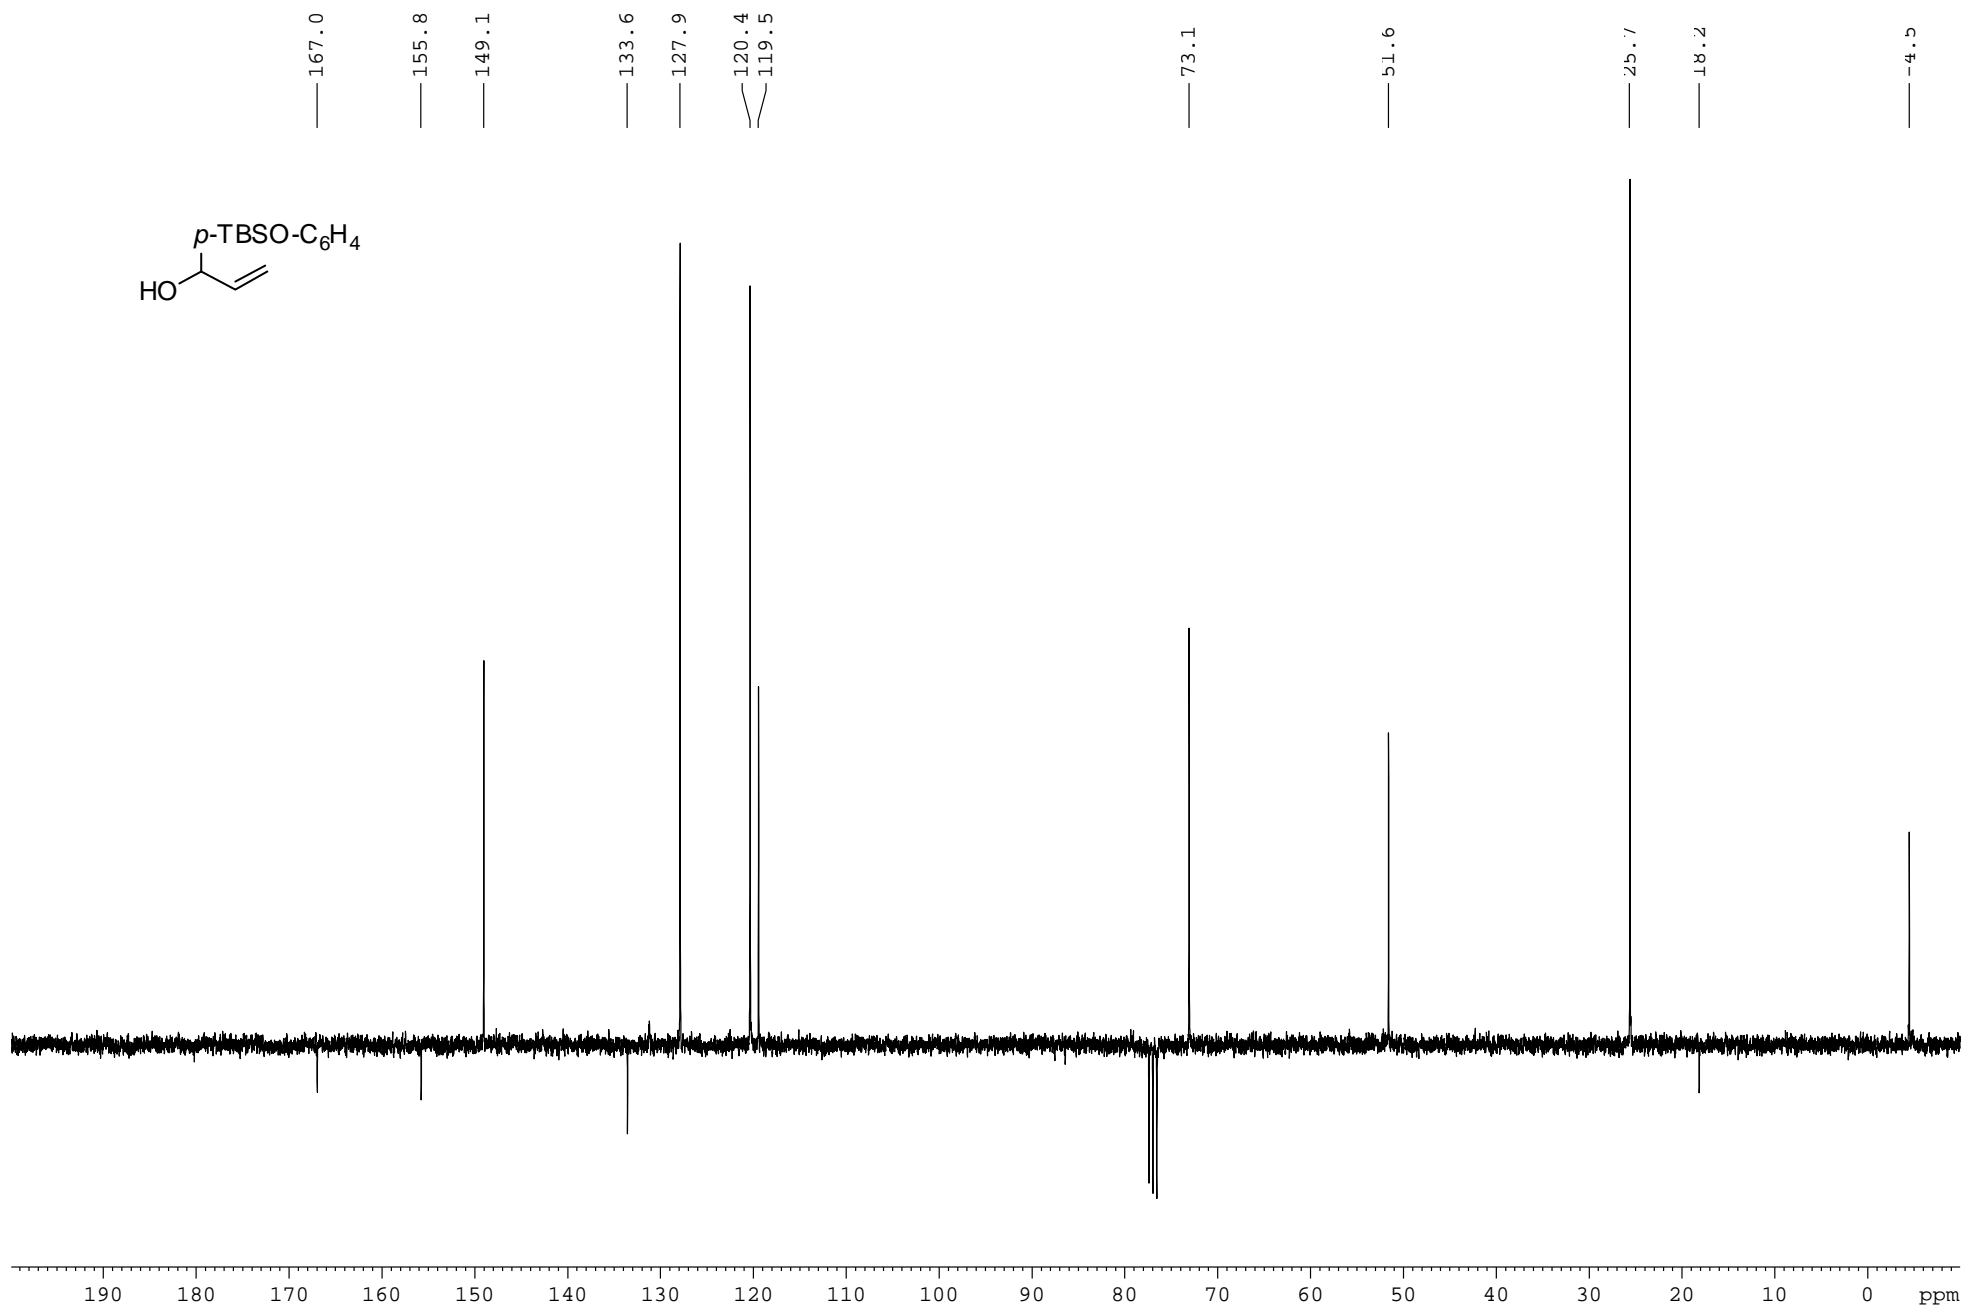

$^1\text{H}$  NMR ( $\text{CDCl}_3$ , 300 MHz) of **5g**

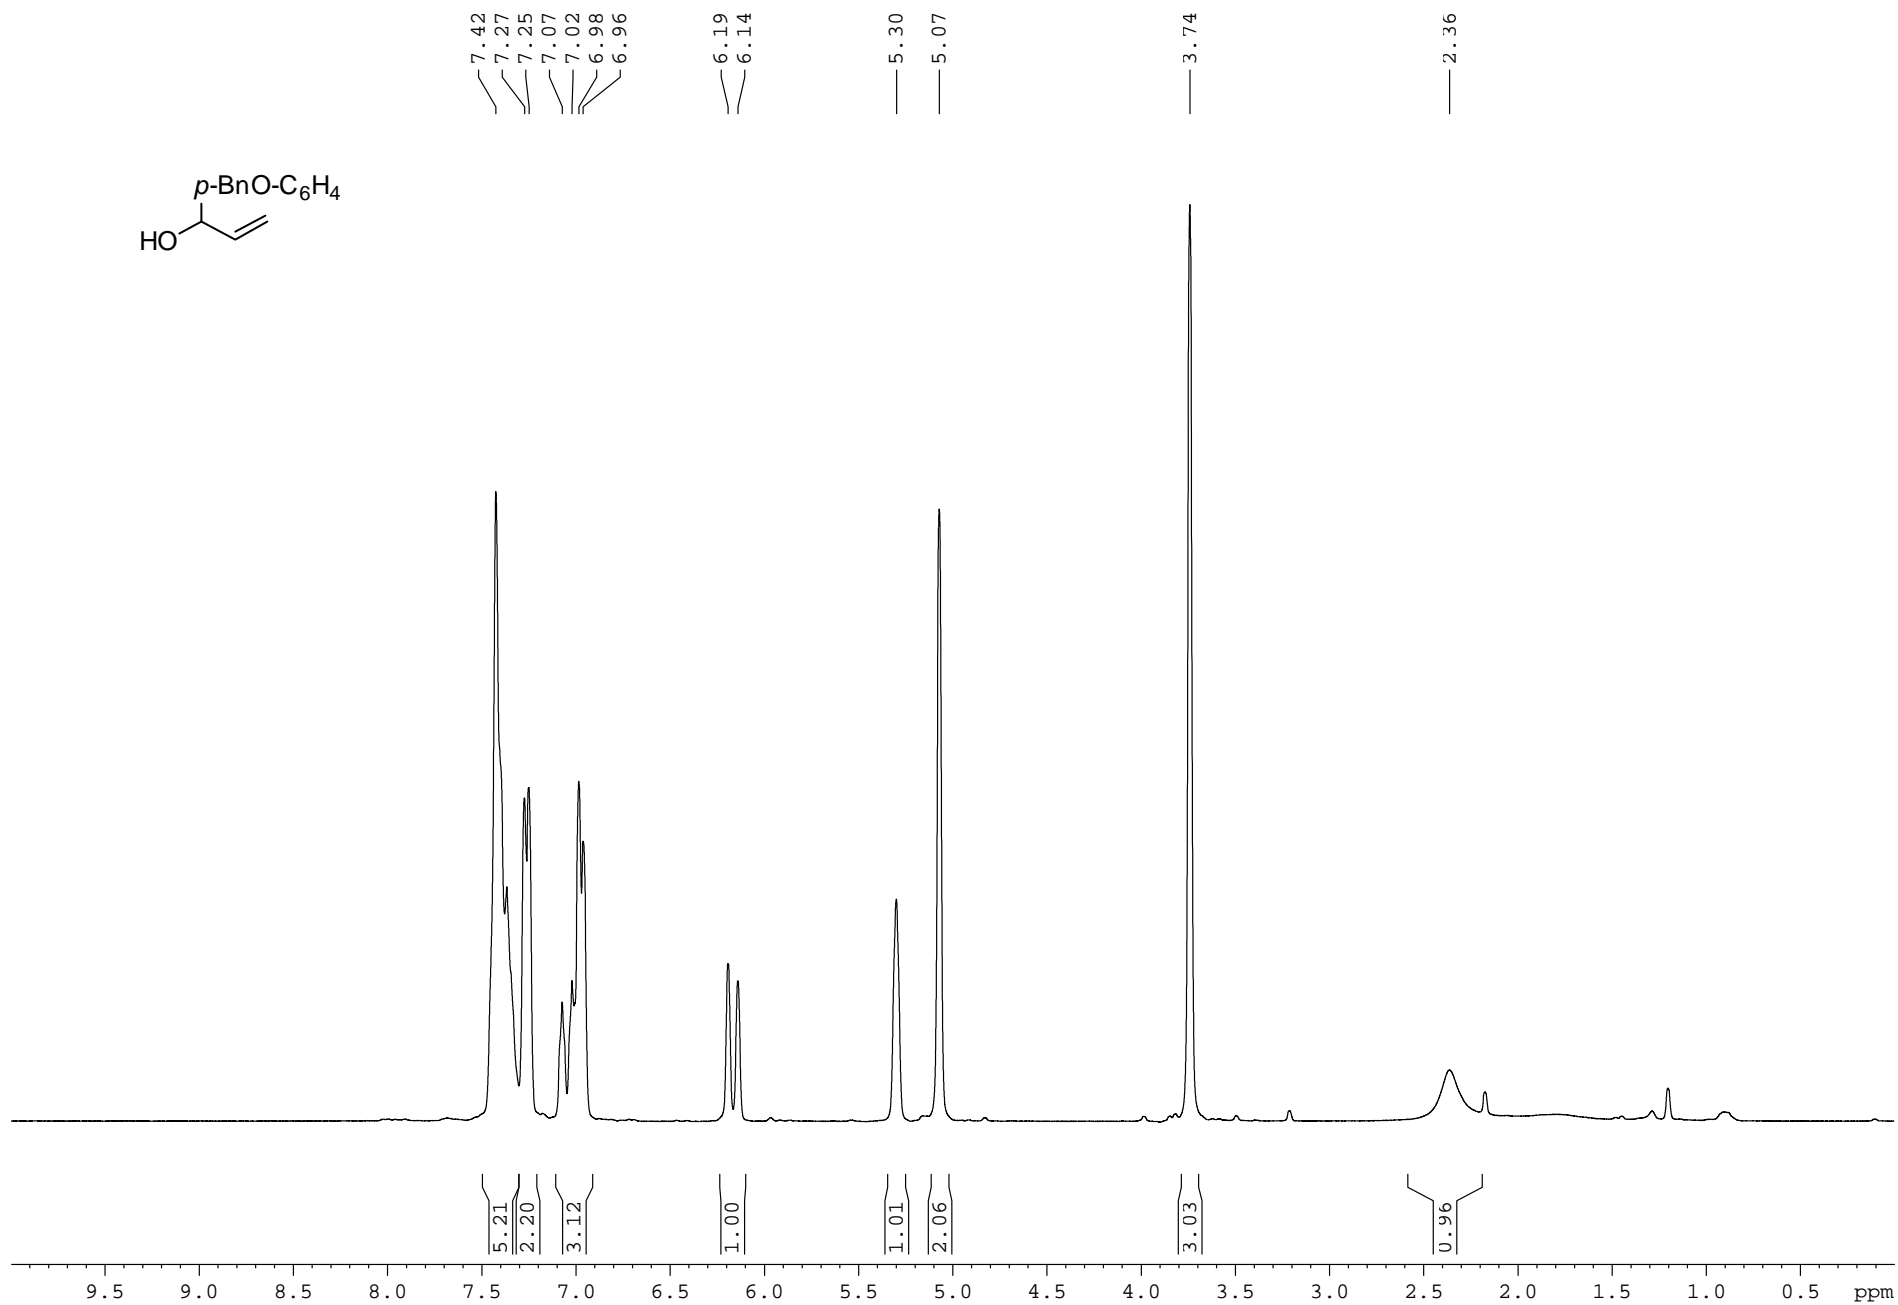

$^{13}\text{C}$  NMR-APT ( $\text{CDCl}_3$ , 75 MHz) of **5g**

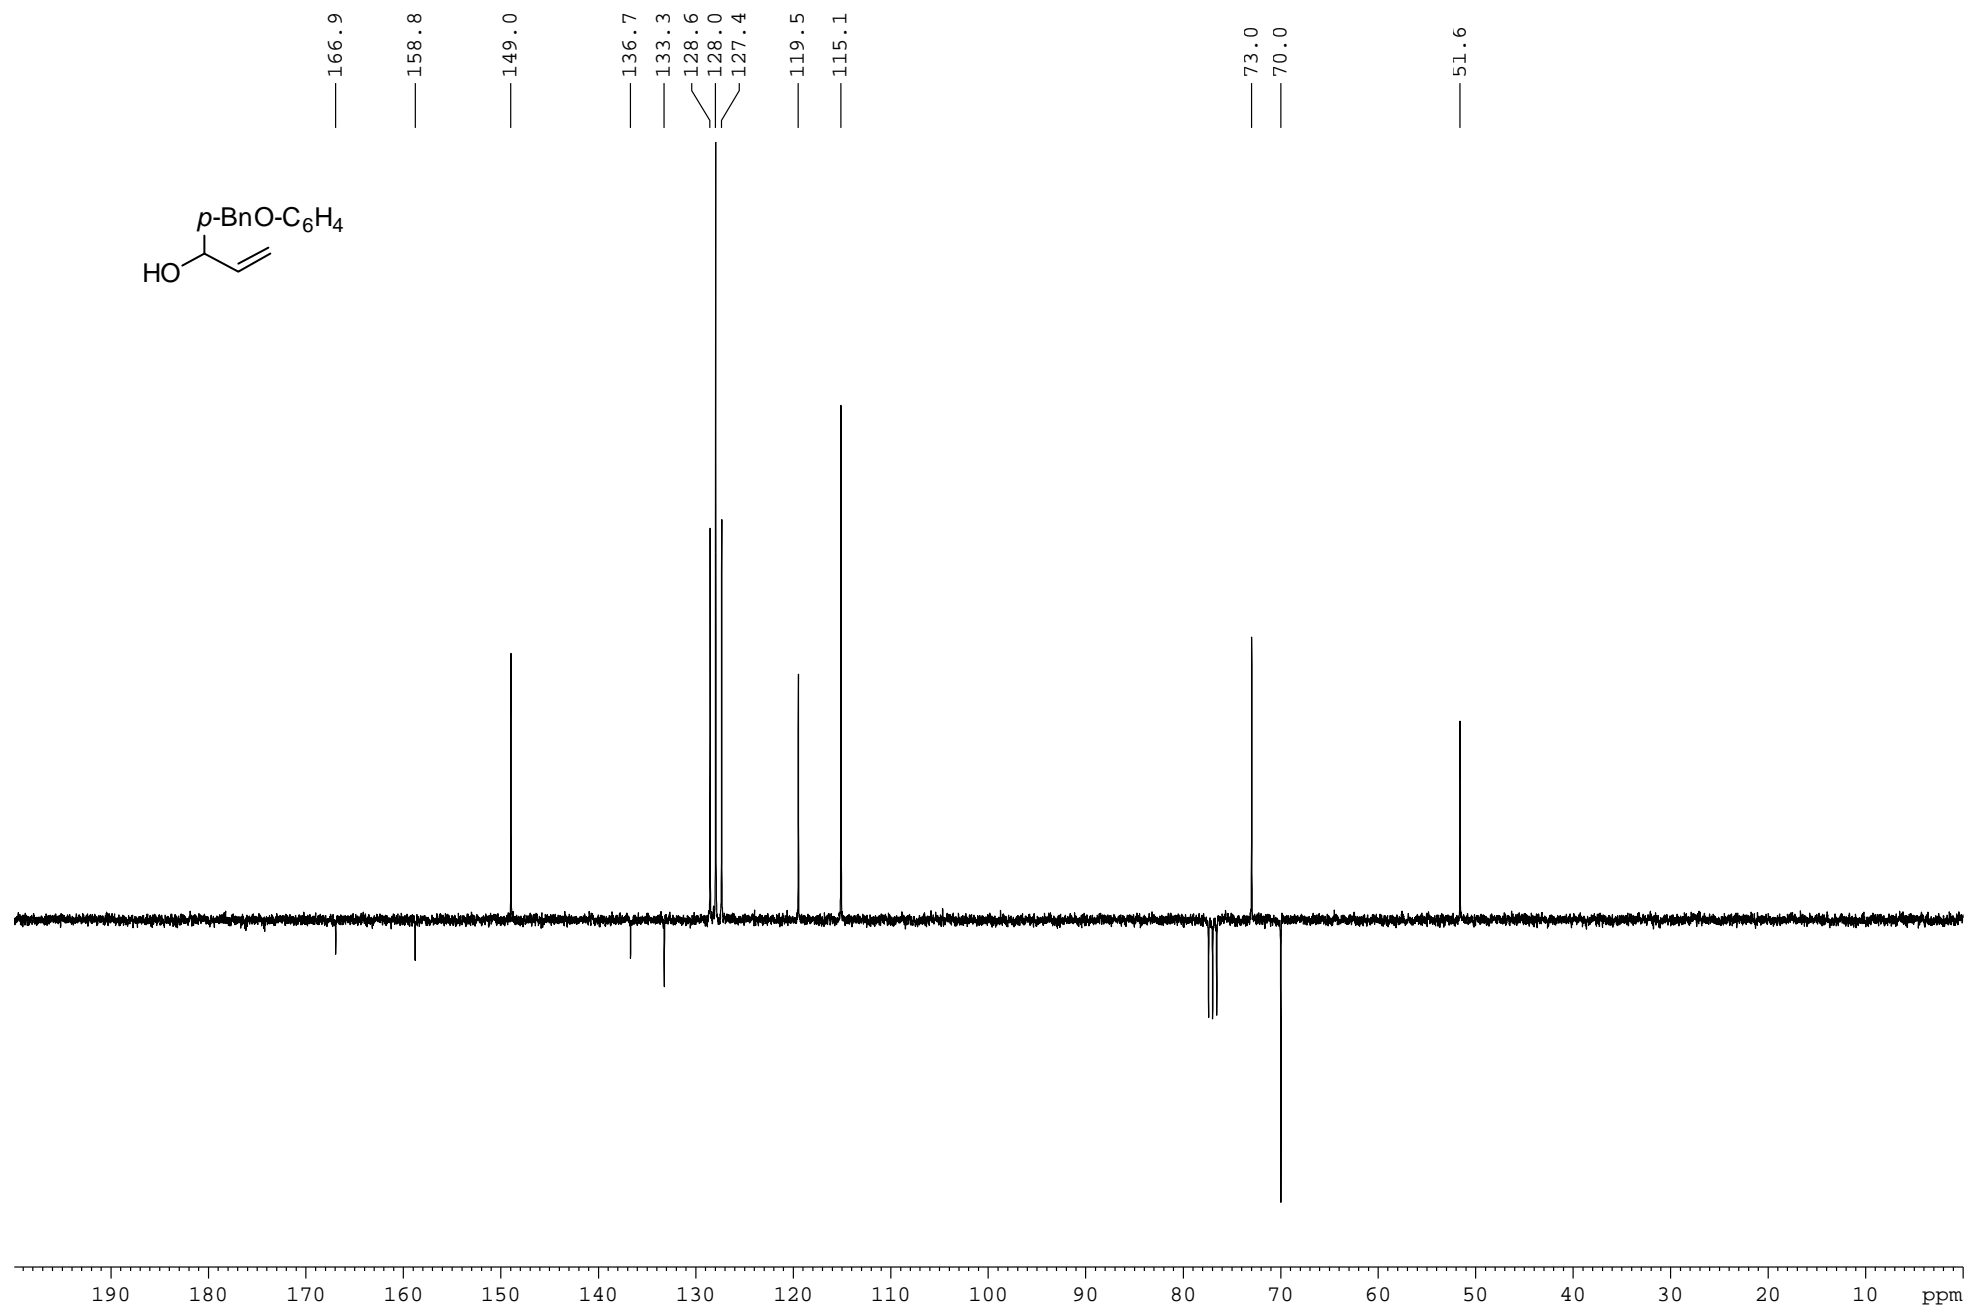

$^1\text{H}$  NMR ( $\text{CDCl}_3$ , 300 MHz) of **5h**

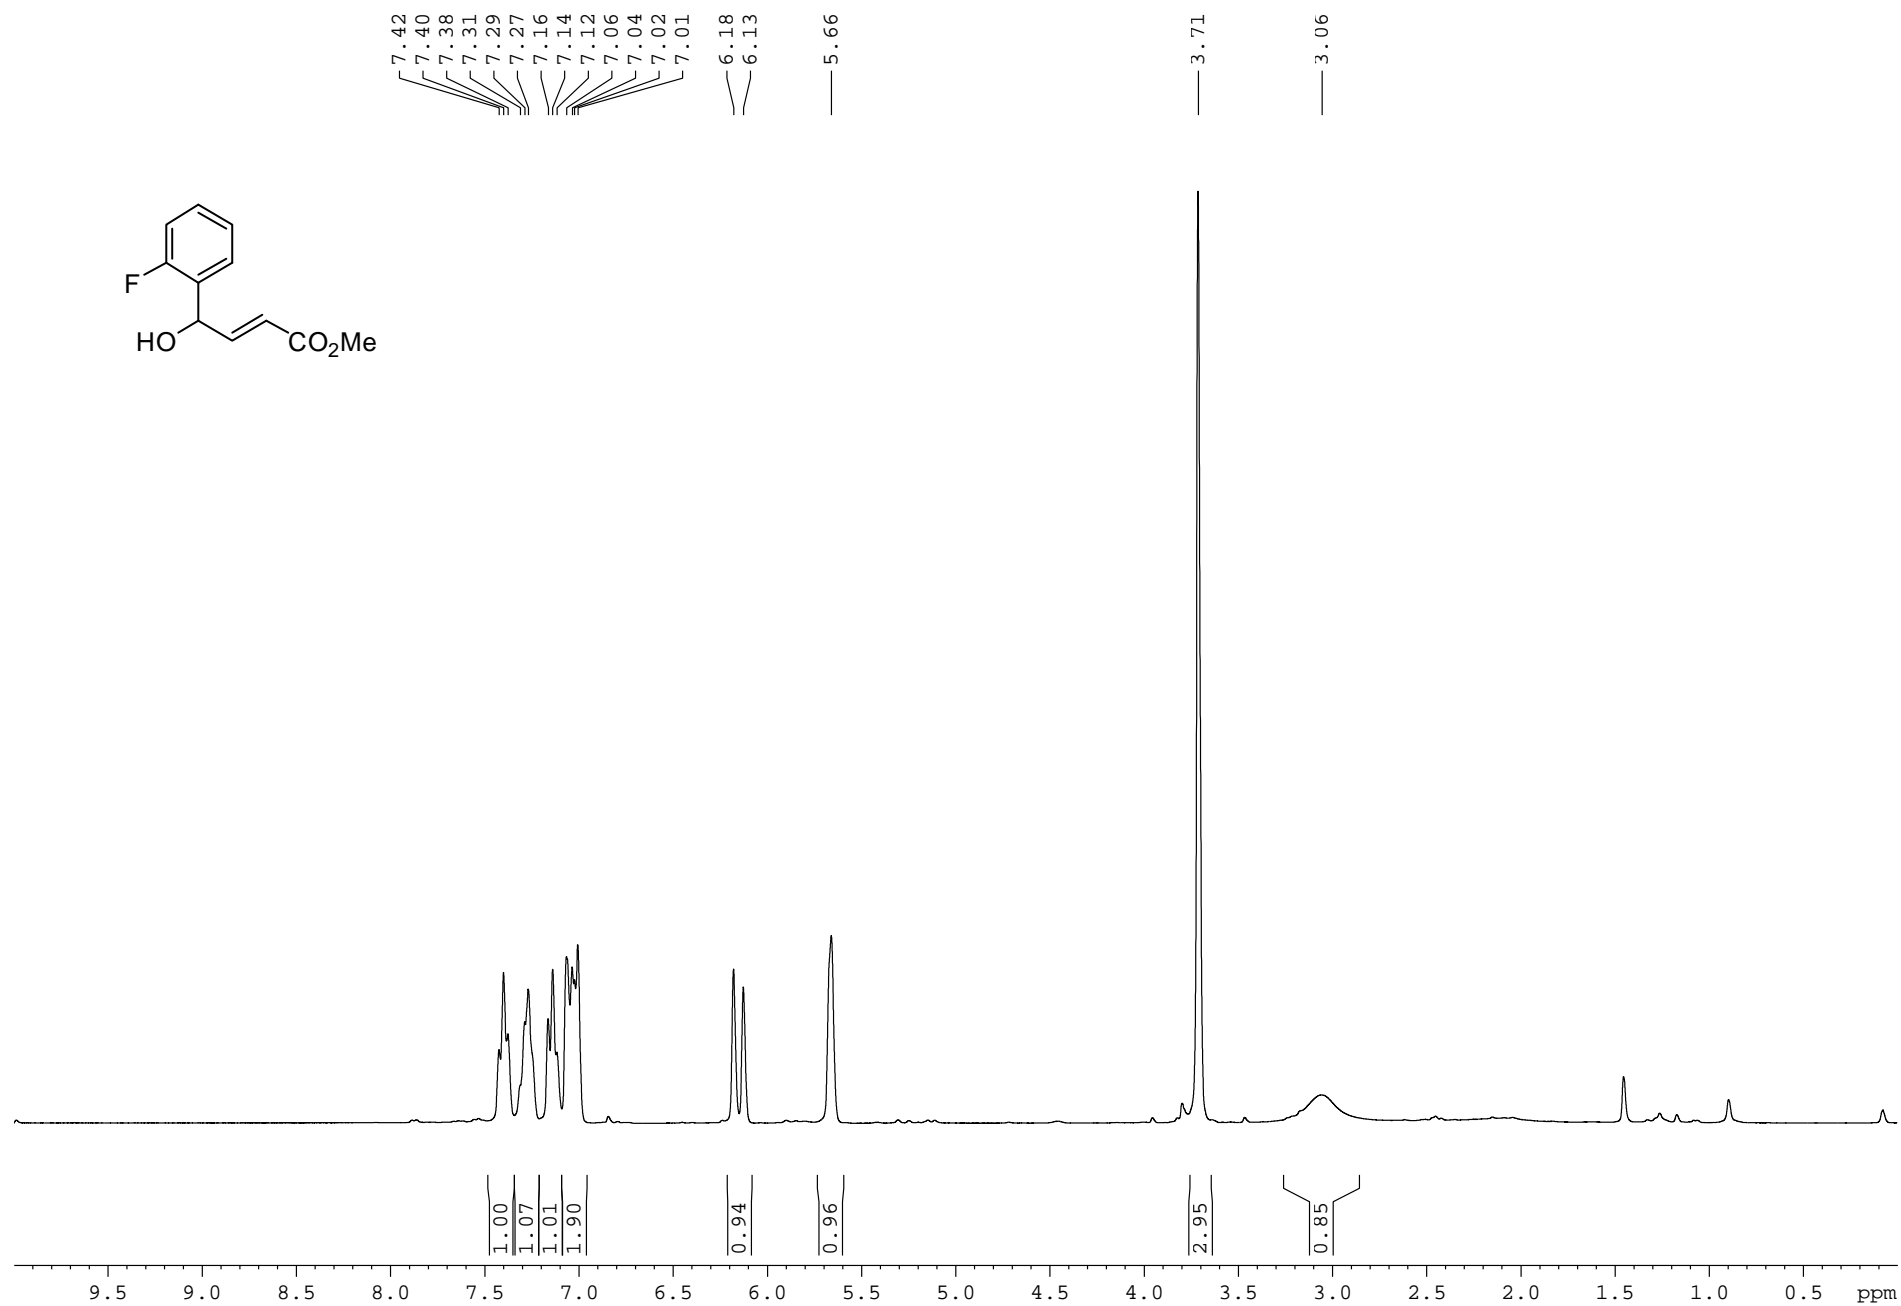

$^{13}\text{C}$  NMR-APT ( $\text{CDCl}_3$ , 75 MHz) of **5h**

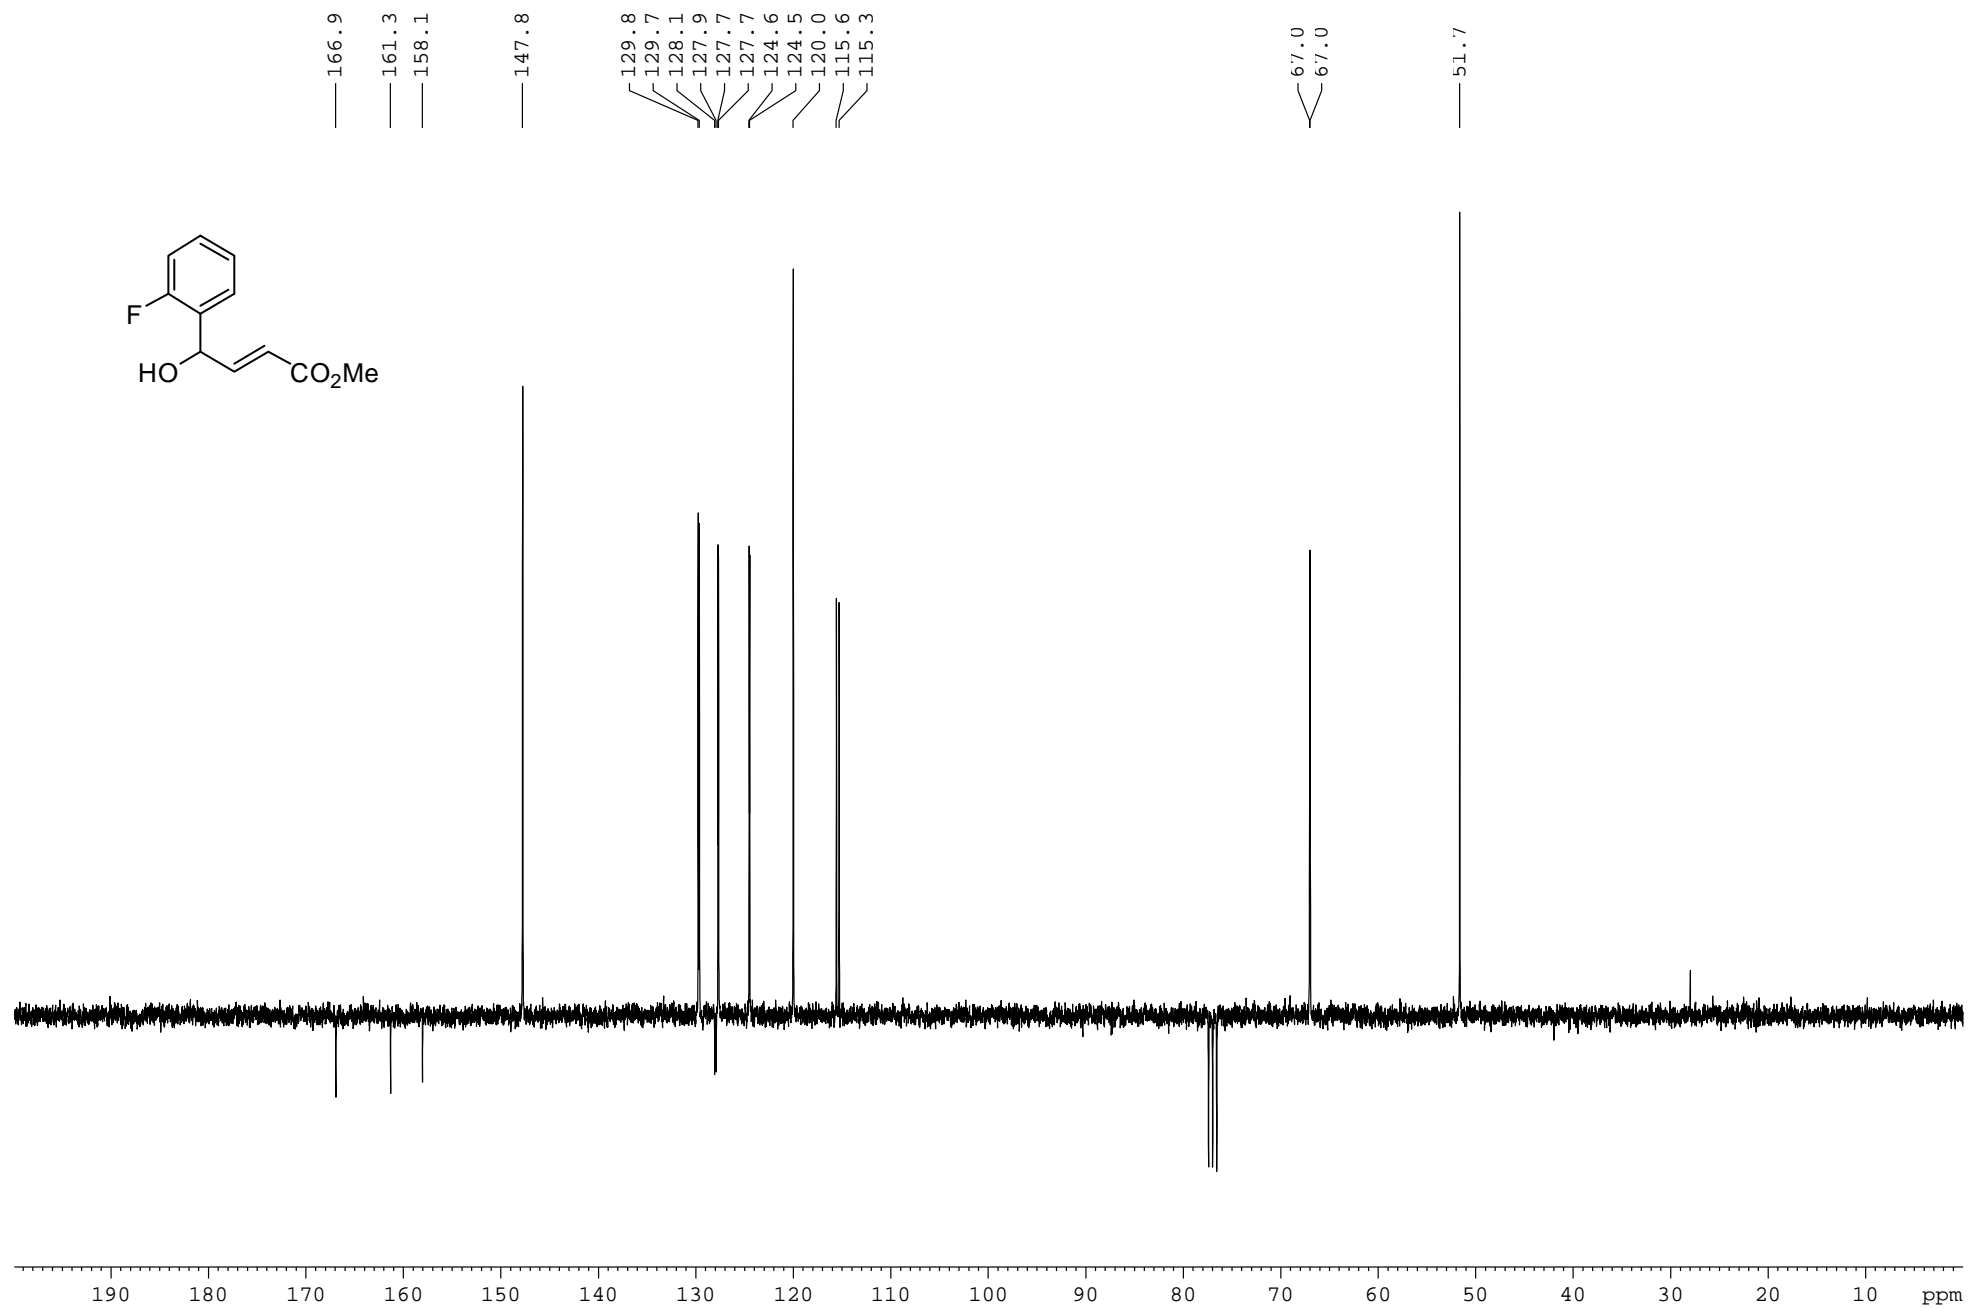

$^1\text{H}$  NMR ( $\text{CDCl}_3$ , 300 MHz) of **5i**

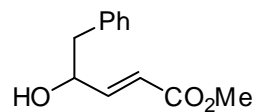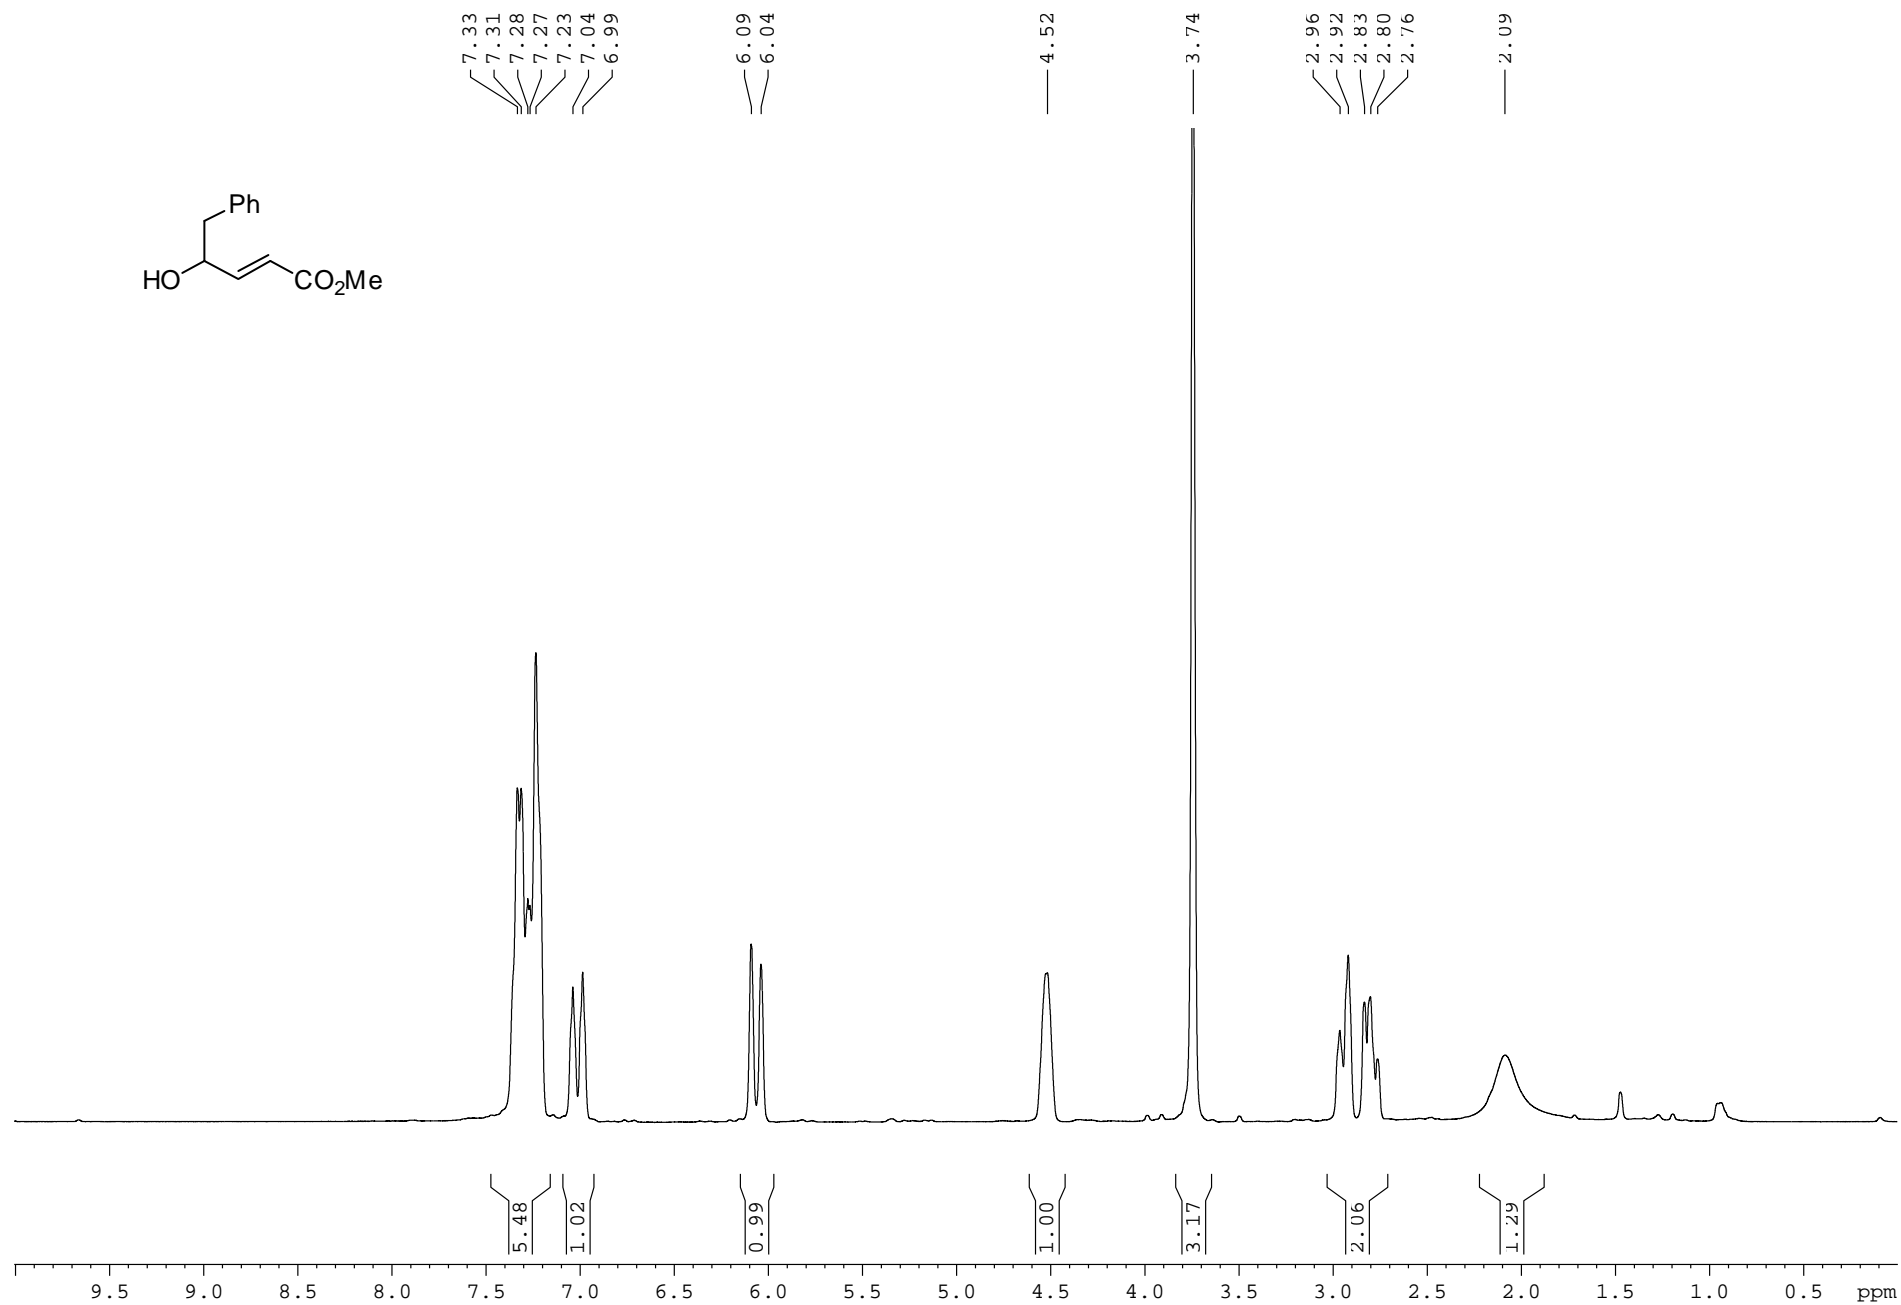

$^{13}\text{C}$  NMR-APT ( $\text{CDCl}_3$ , 75 MHz) of **5i**

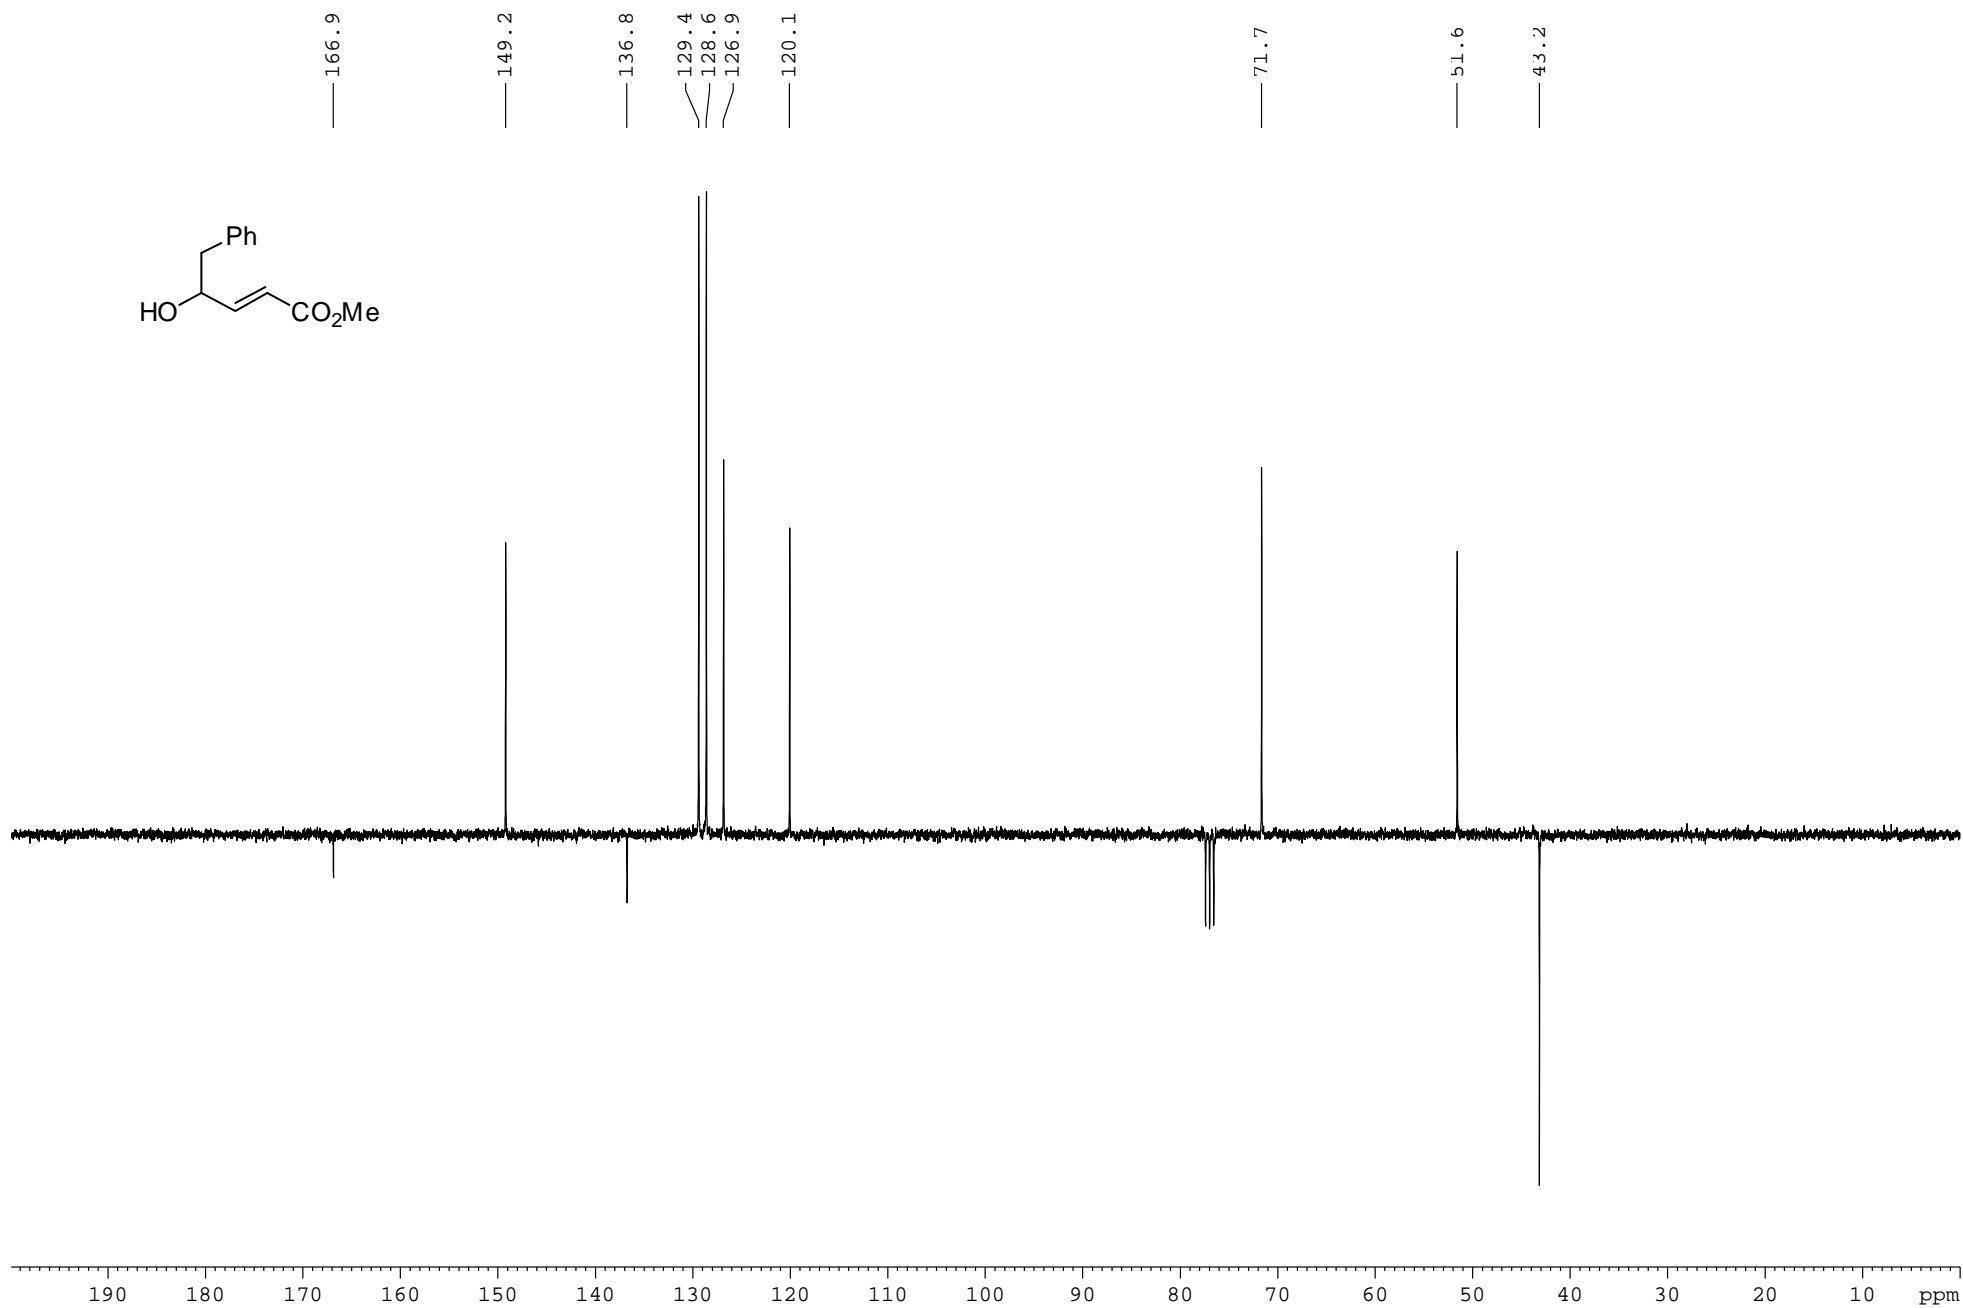

$^1\text{H}$  NMR ( $\text{CDCl}_3$ , 300 MHz) of **5j**

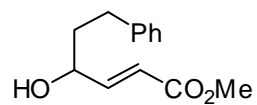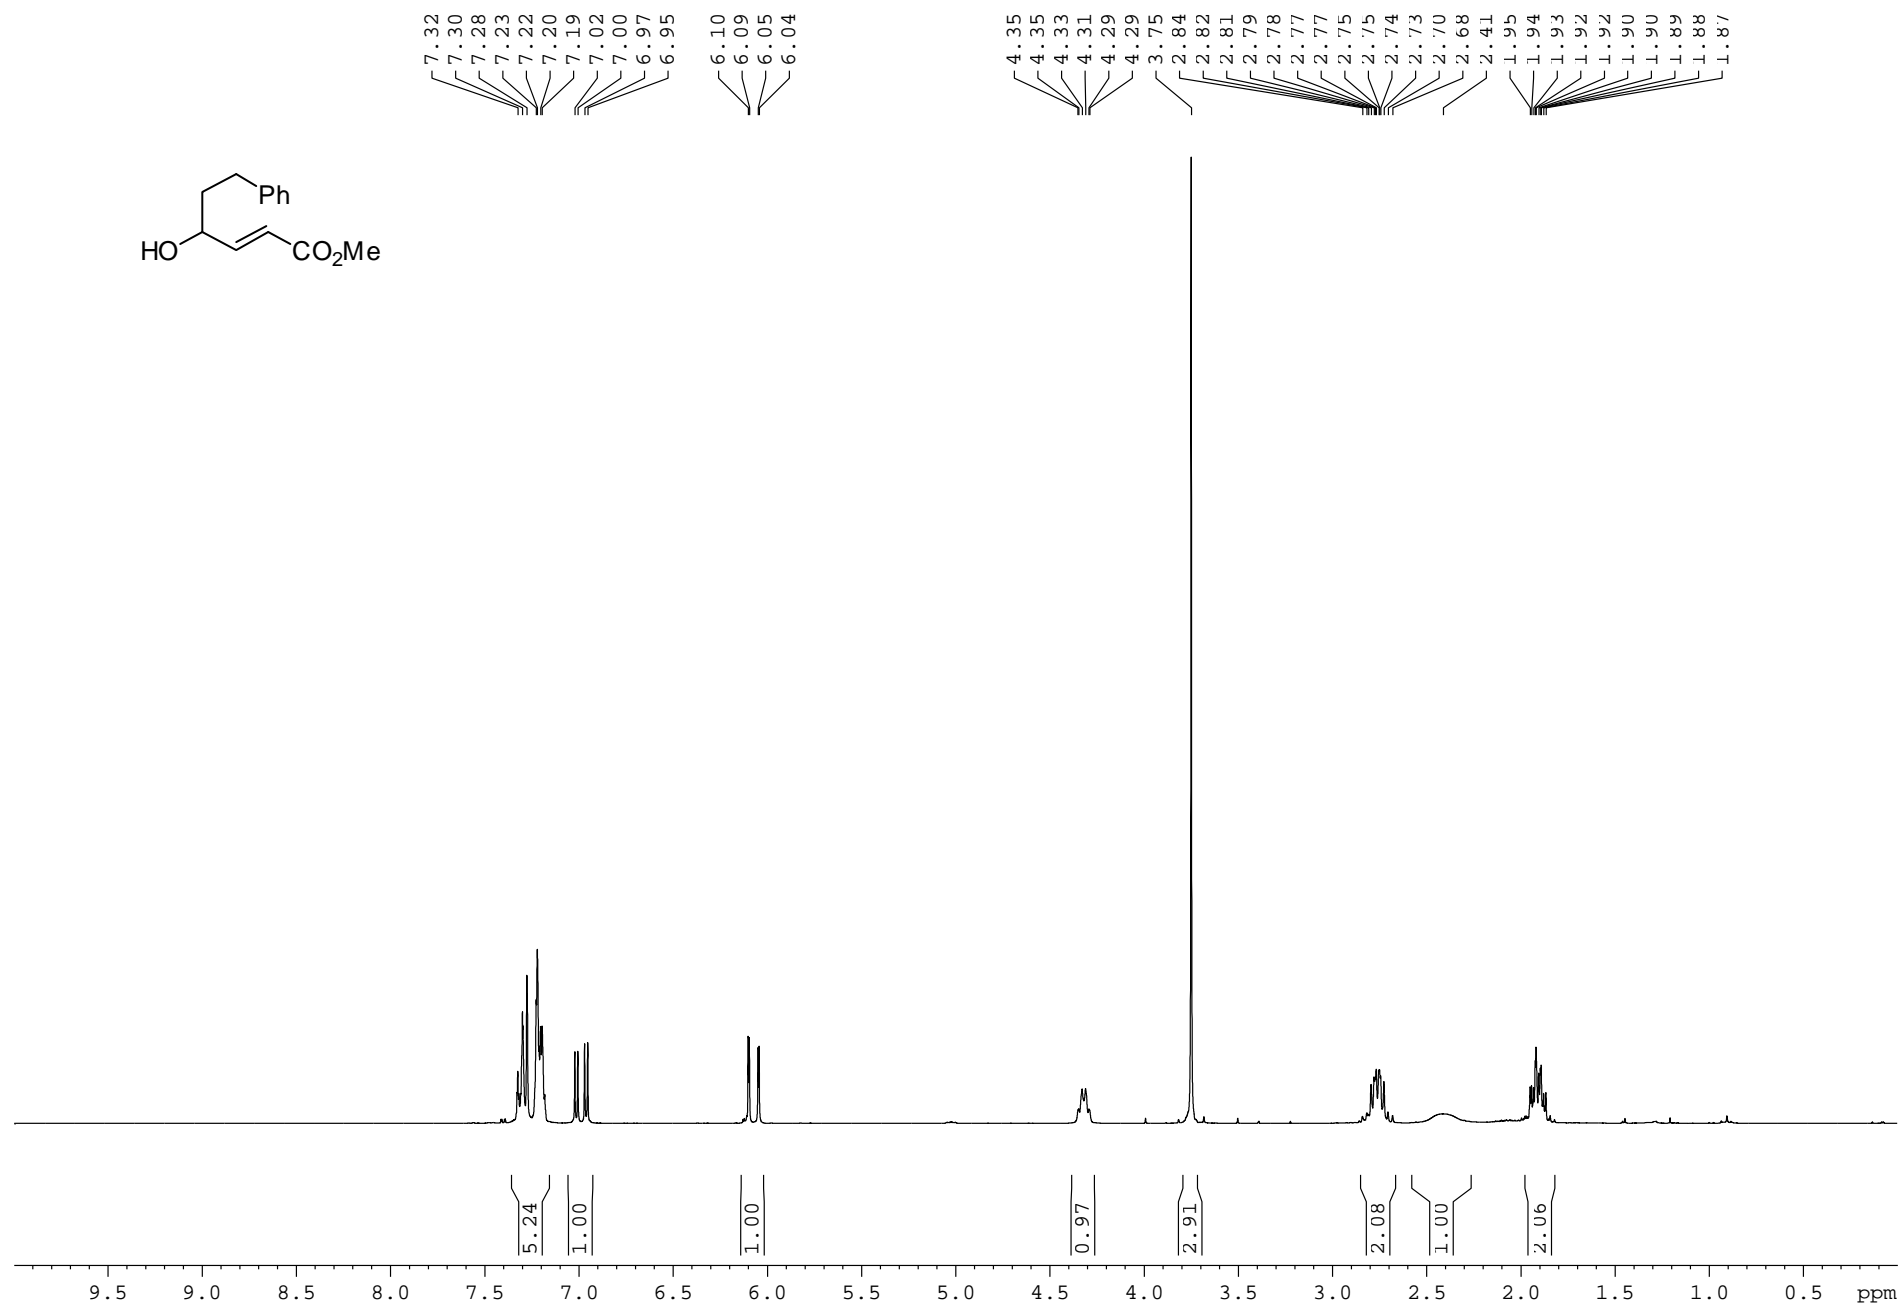



$^{13}\text{C}$  NMR-APT ( $\text{CDCl}_3$ , 75 MHz) of **5j**

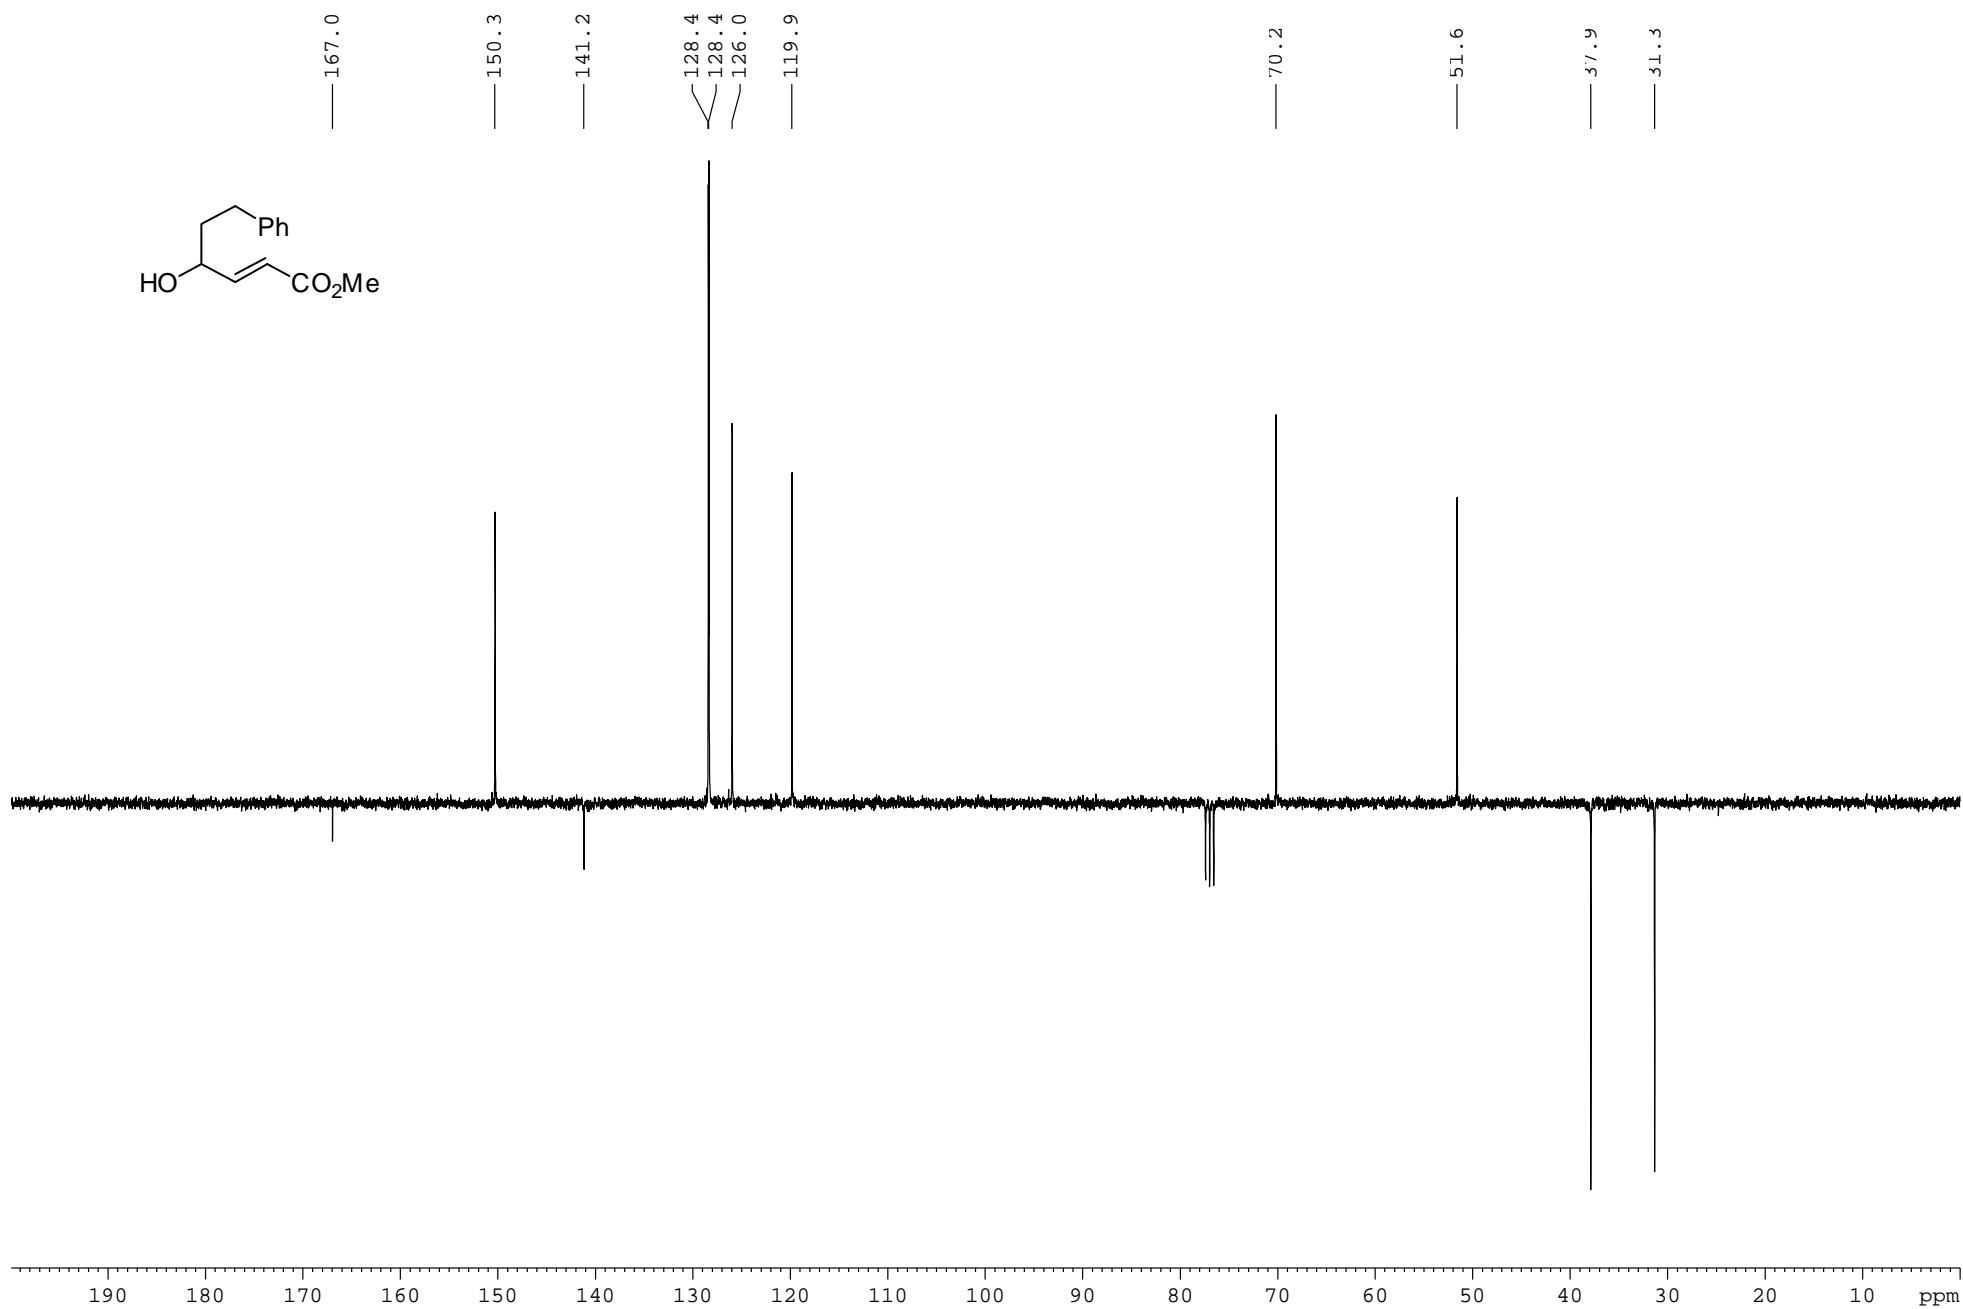

$^1\text{H}$  NMR ( $\text{CDCl}_3$ , 300 MHz) of **5k**

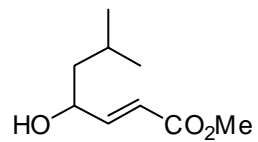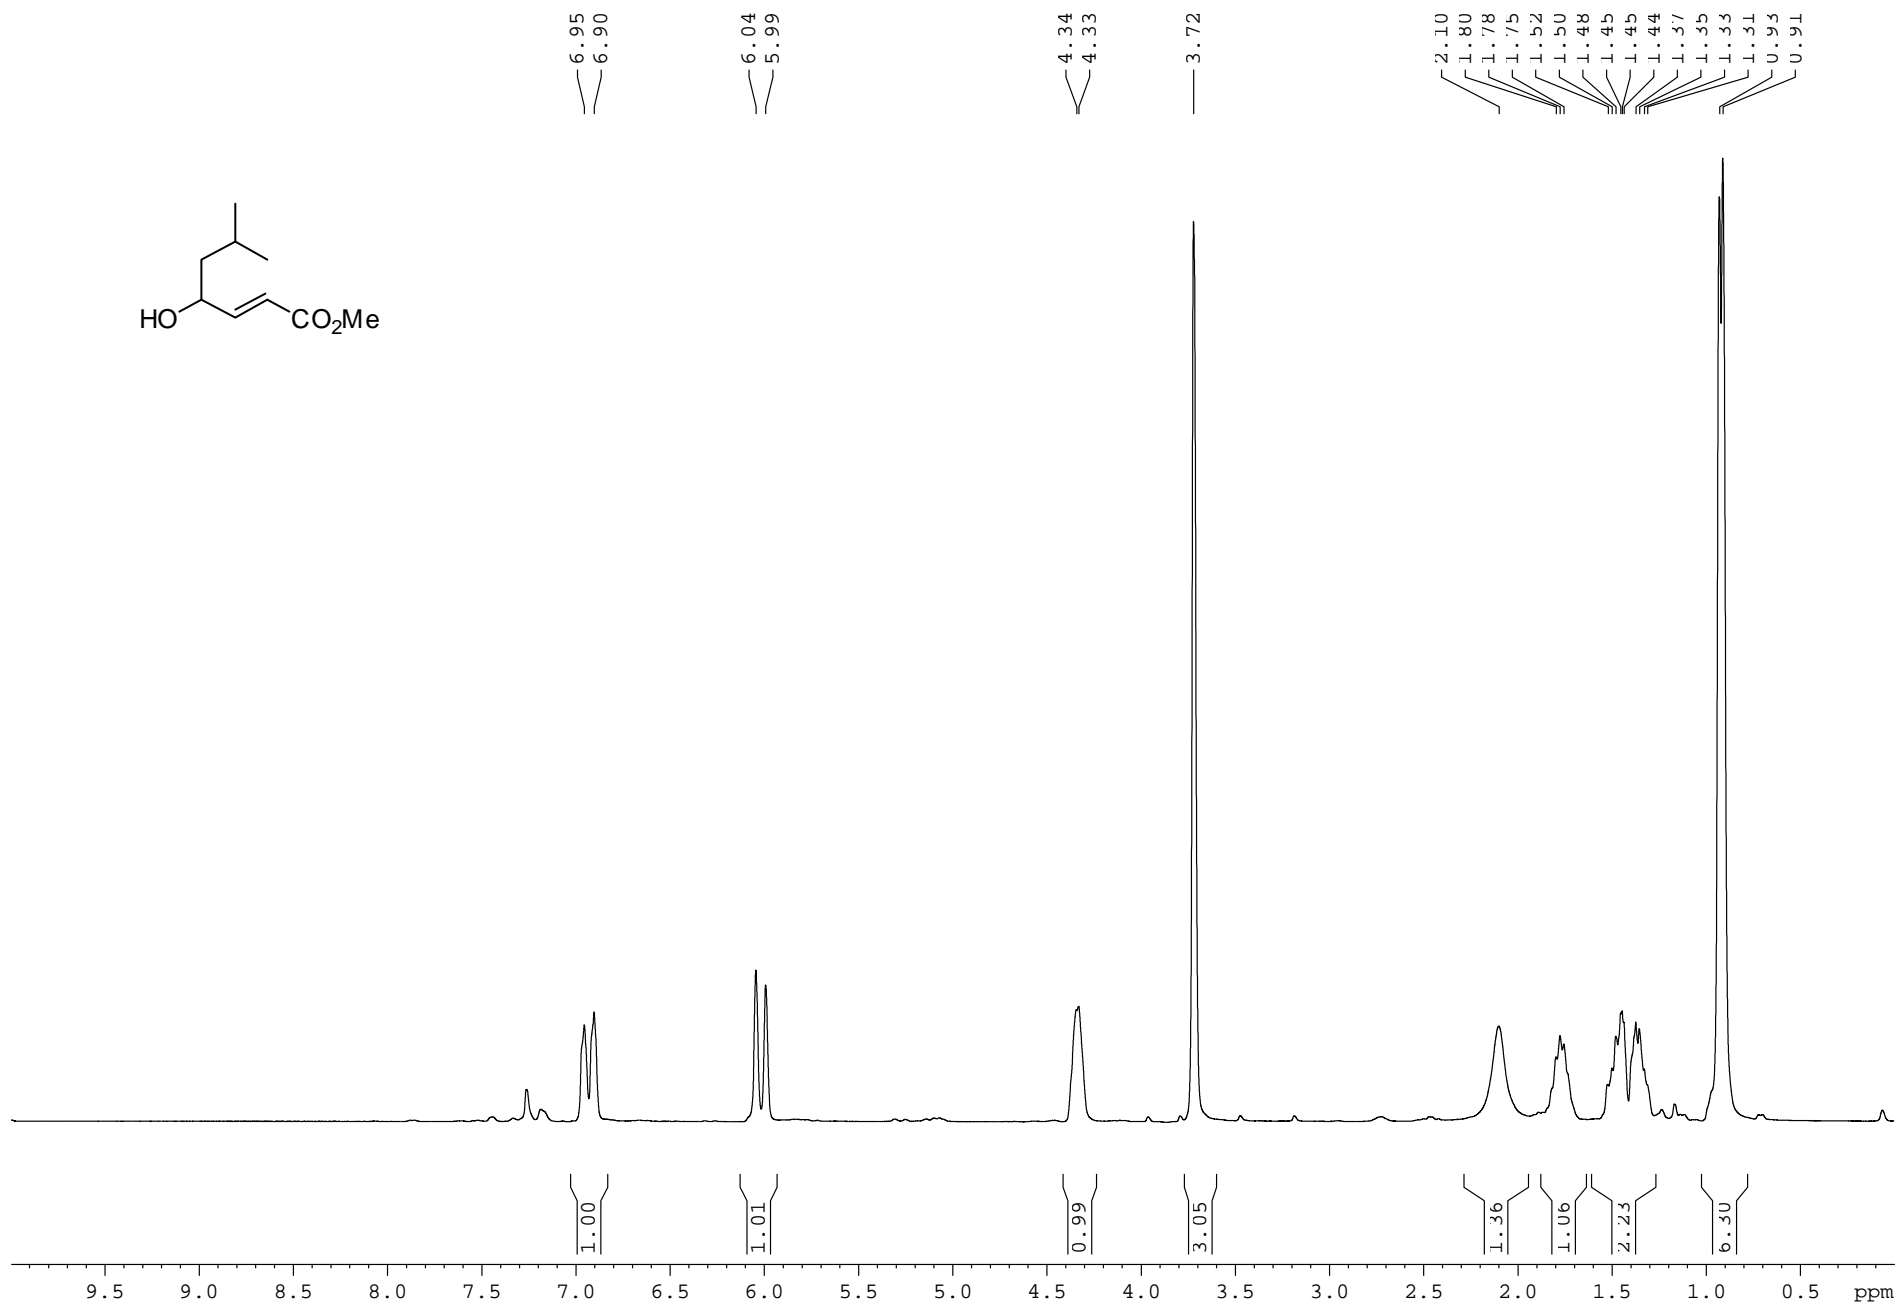

$^{13}\text{C}$  NMR-APT ( $\text{CDCl}_3$ , 75 MHz) of **5k**

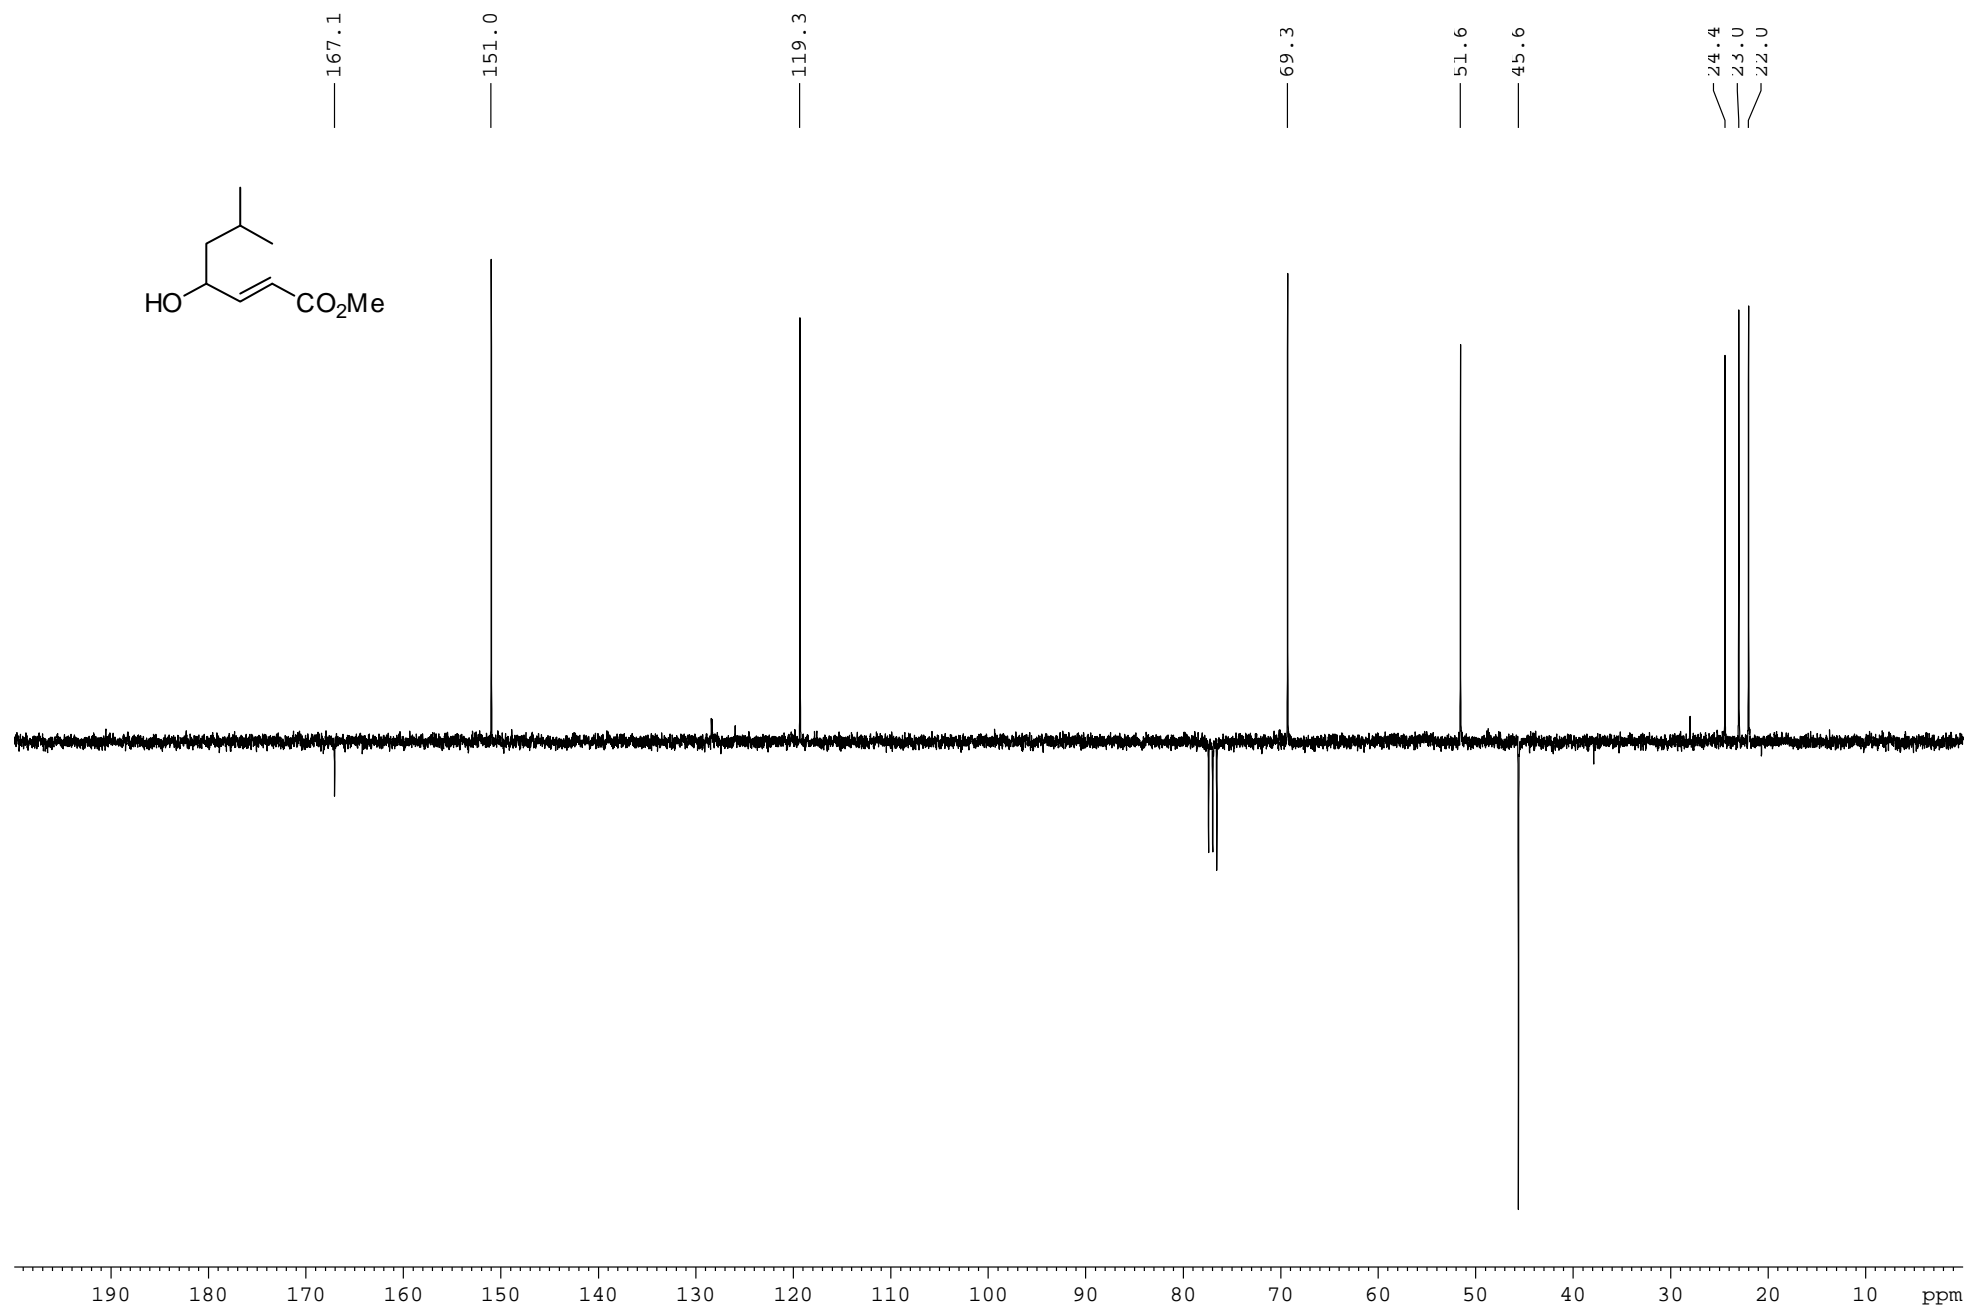

$^1\text{H}$  NMR ( $\text{CDCl}_3$ , 300 MHz) of **51**

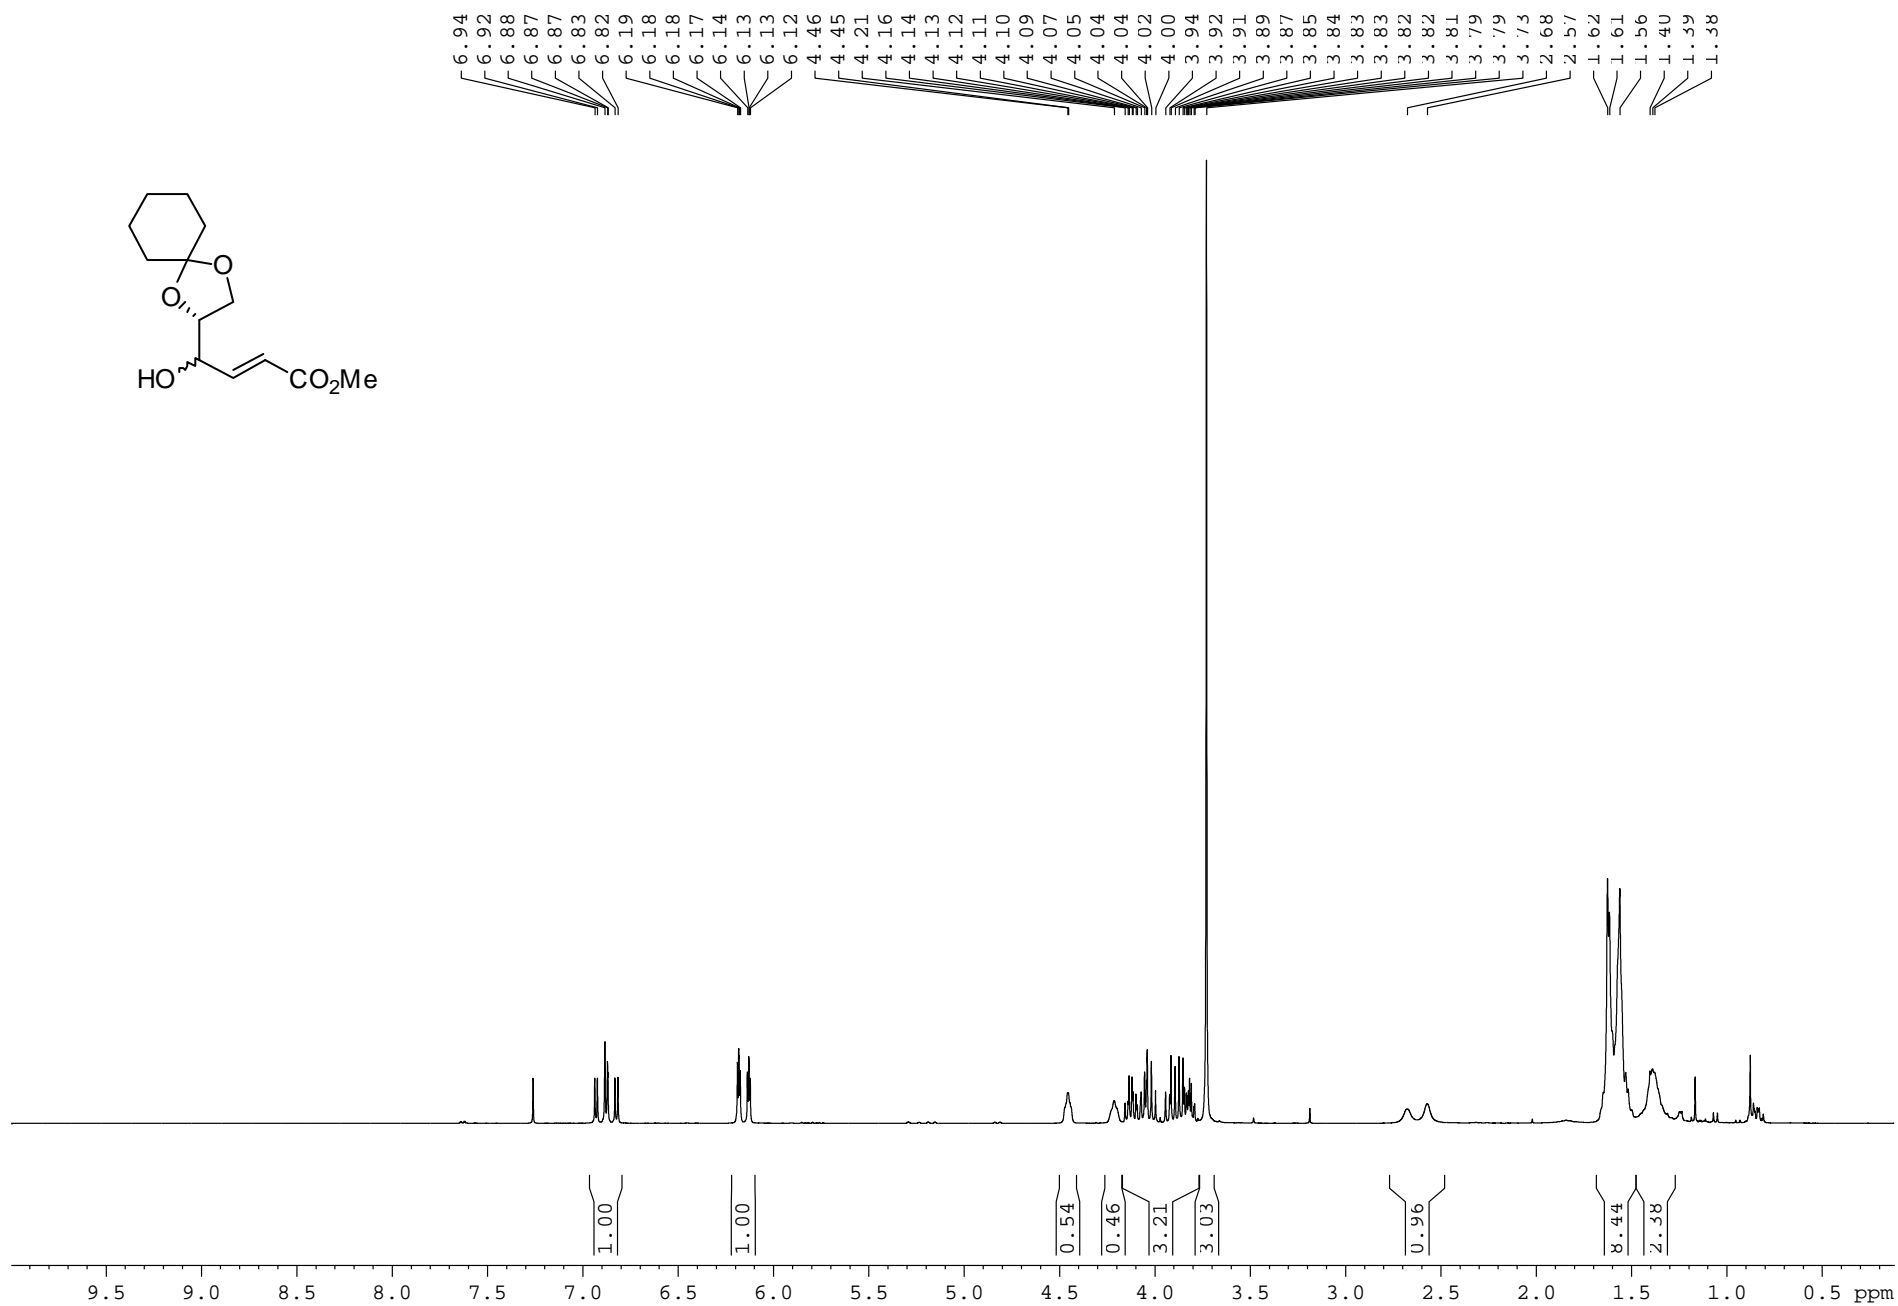

$^{13}\text{C}$  NMR-APT ( $\text{CDCl}_3$ , 75 MHz) of **51**

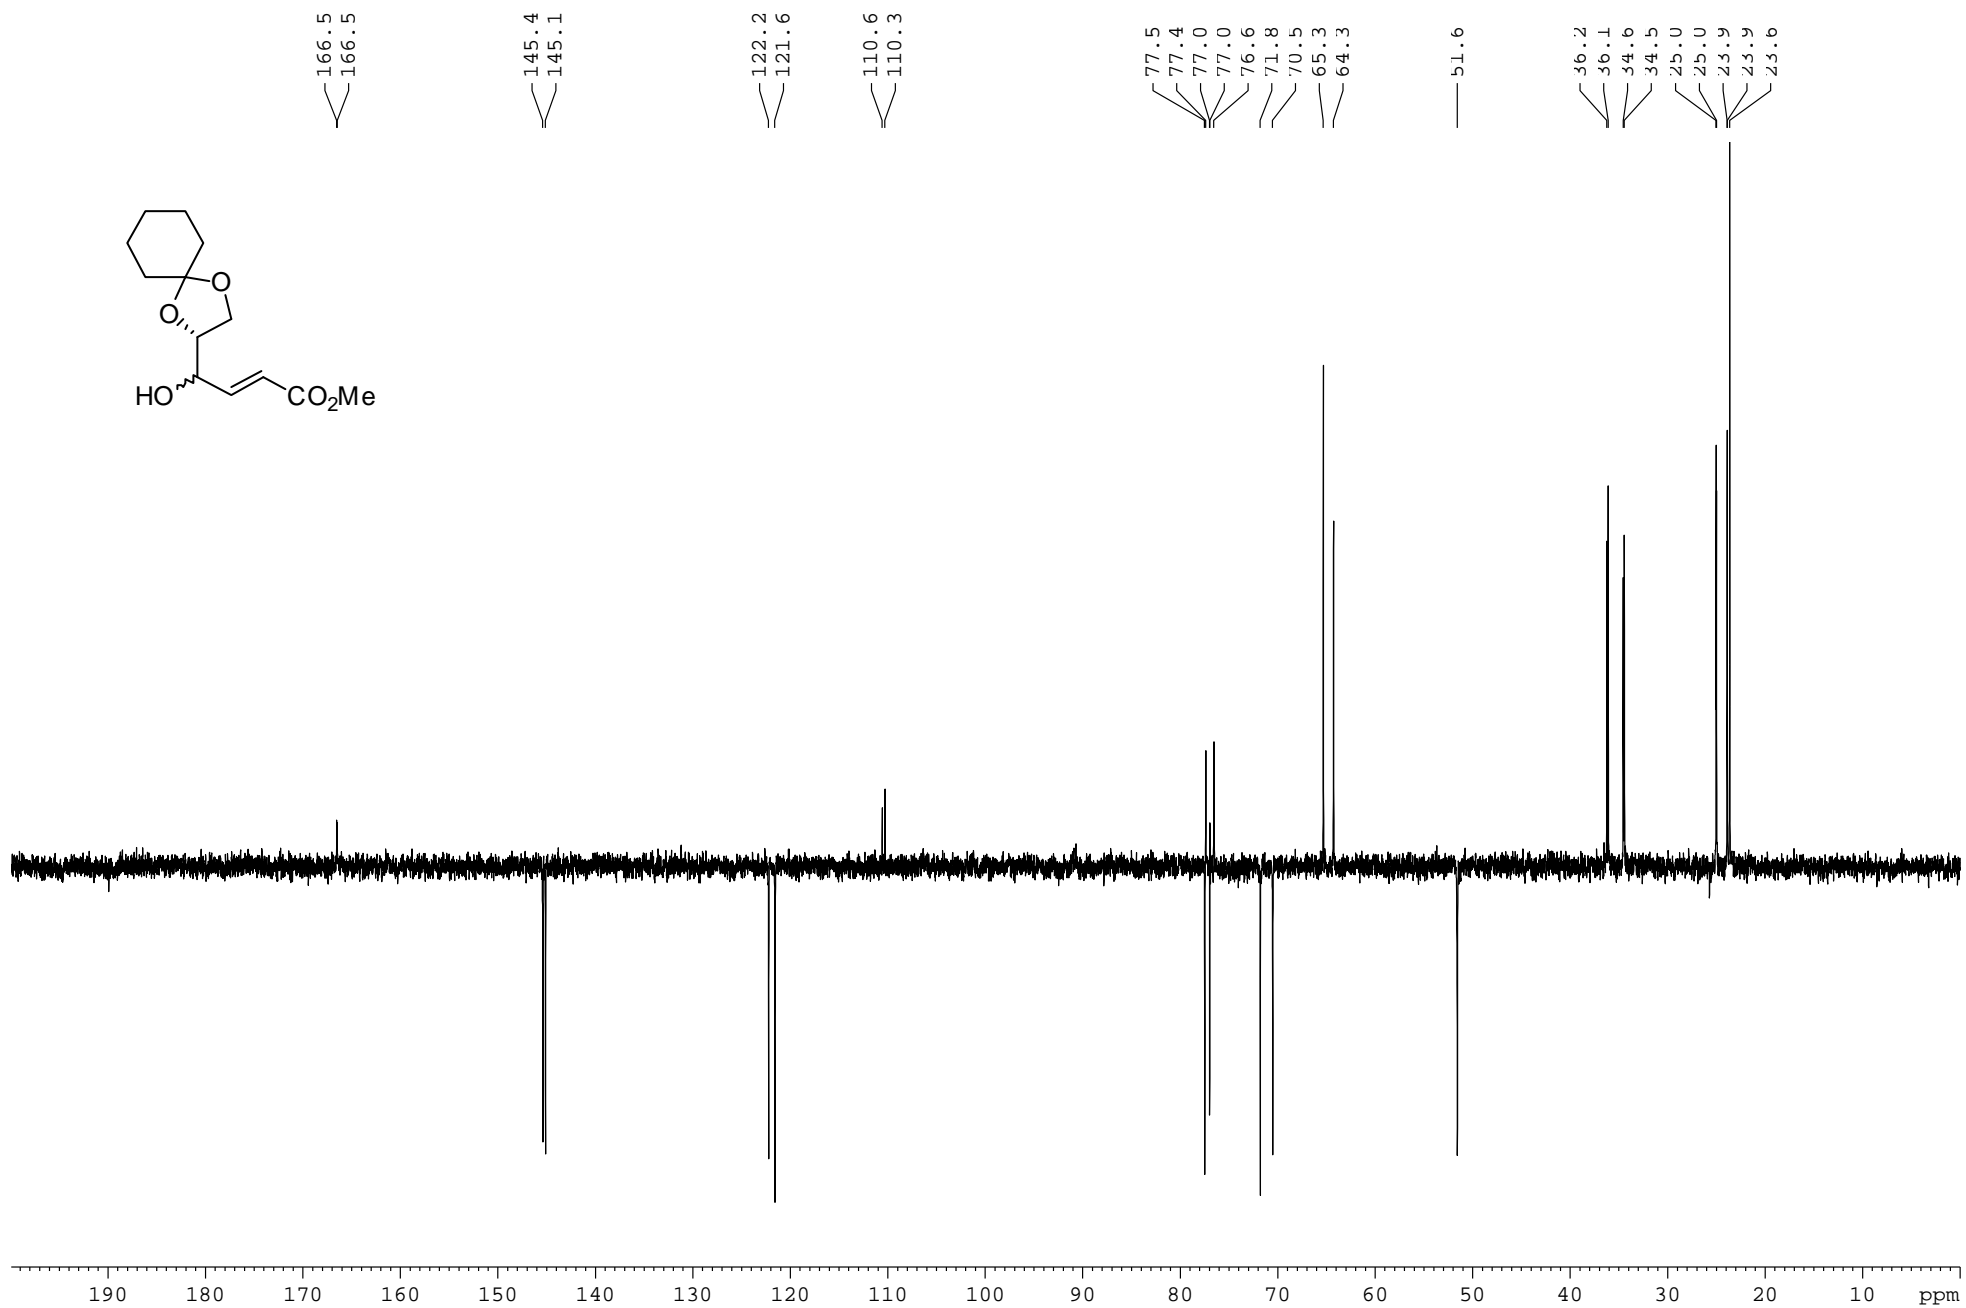

$^1\text{H}$  NMR ( $\text{CDCl}_3$ , 300 MHz) of **5m**

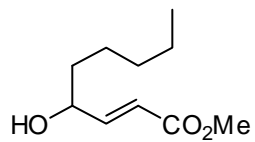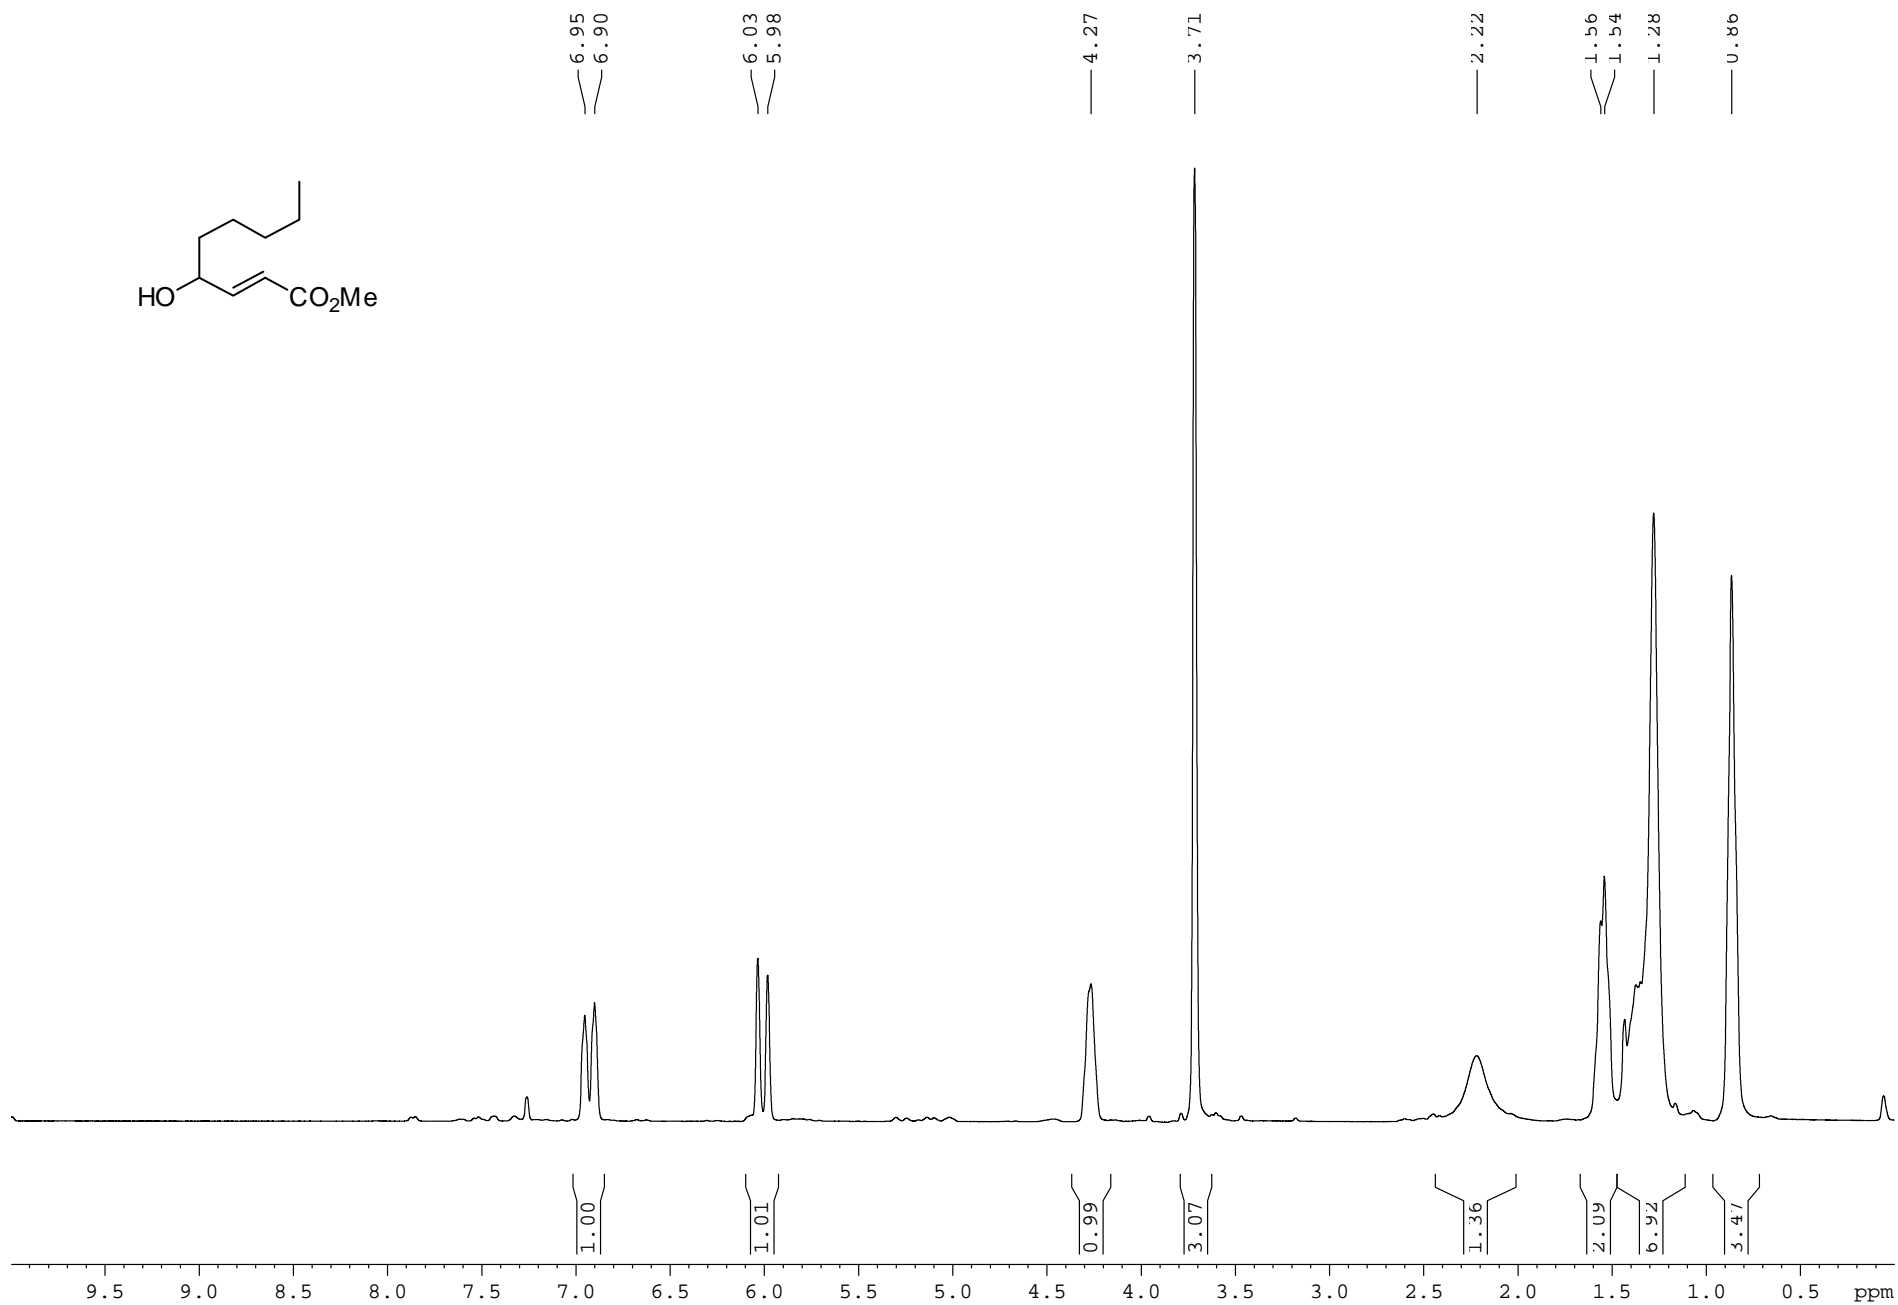

$^{13}\text{C}$  NMR-APT ( $\text{CDCl}_3$ , 75 MHz) of **5m**

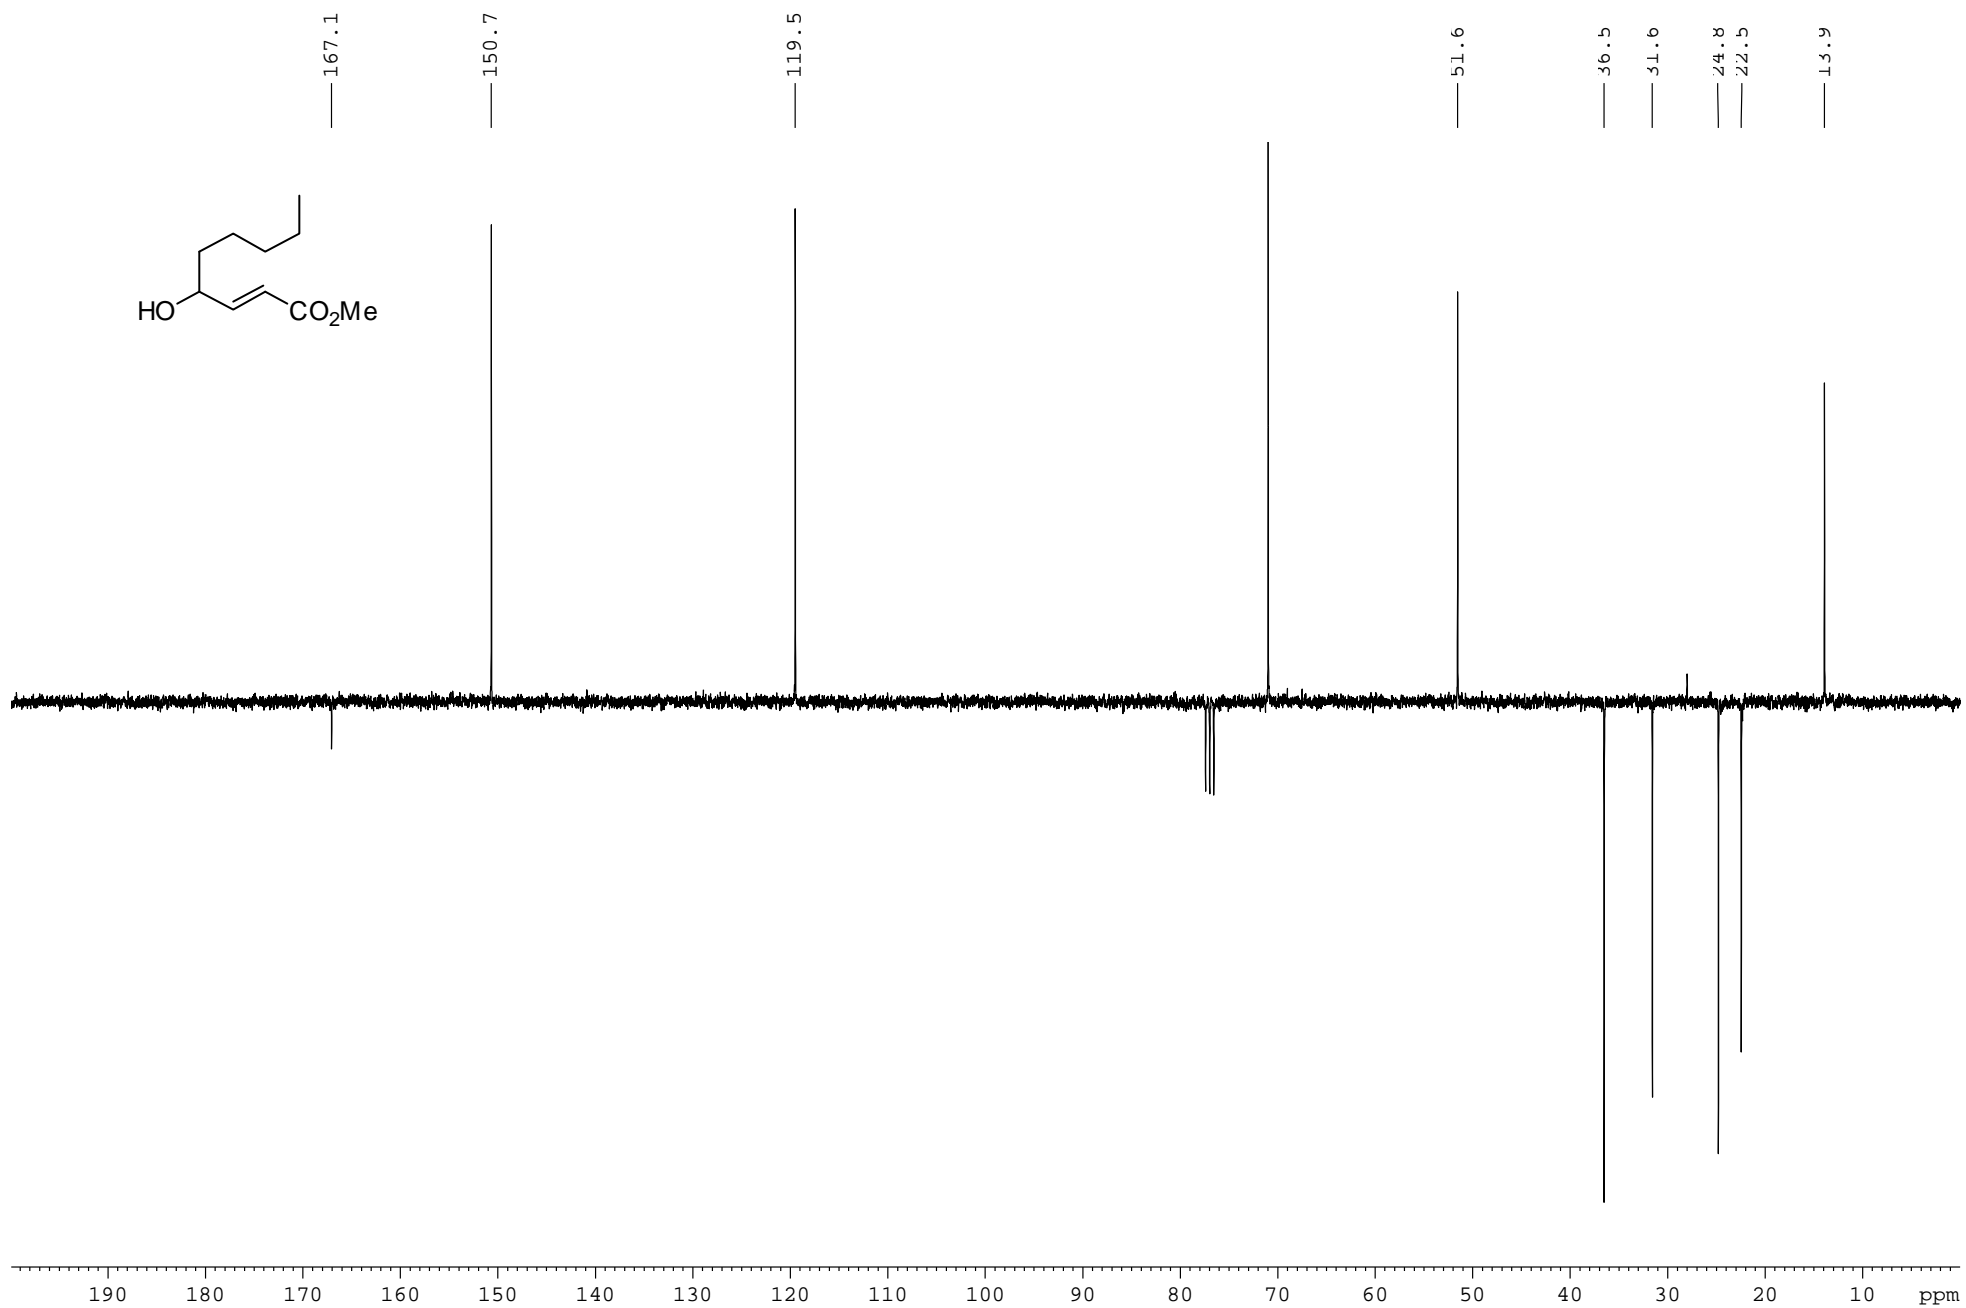

$^1\text{H}$  NMR ( $\text{CDCl}_3$ , 300 MHz) of **5n**

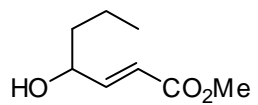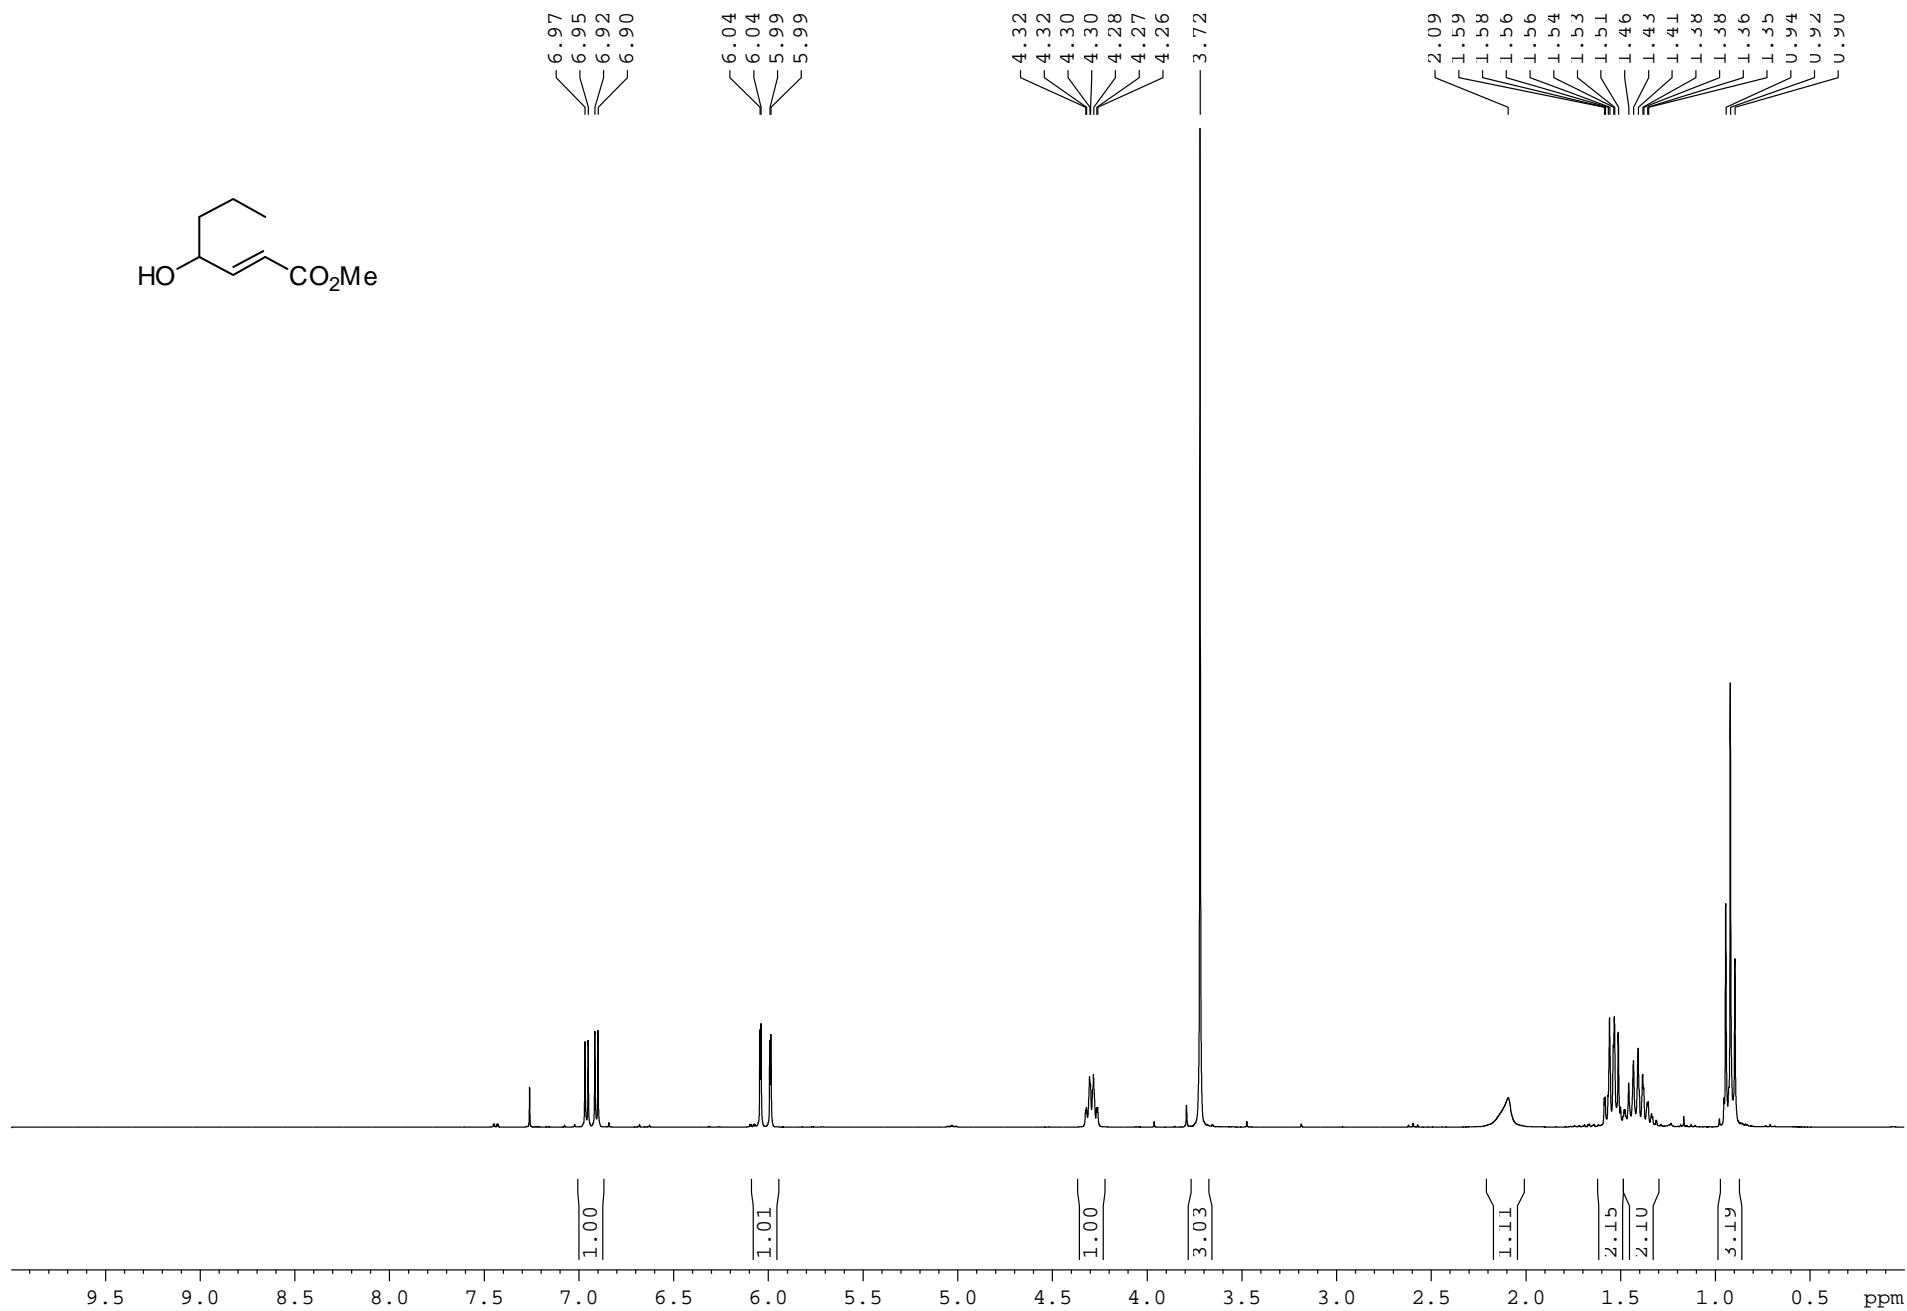



$^{13}\text{C}$  NMR-APT ( $\text{CDCl}_3$ , 75 MHz) of **5n**

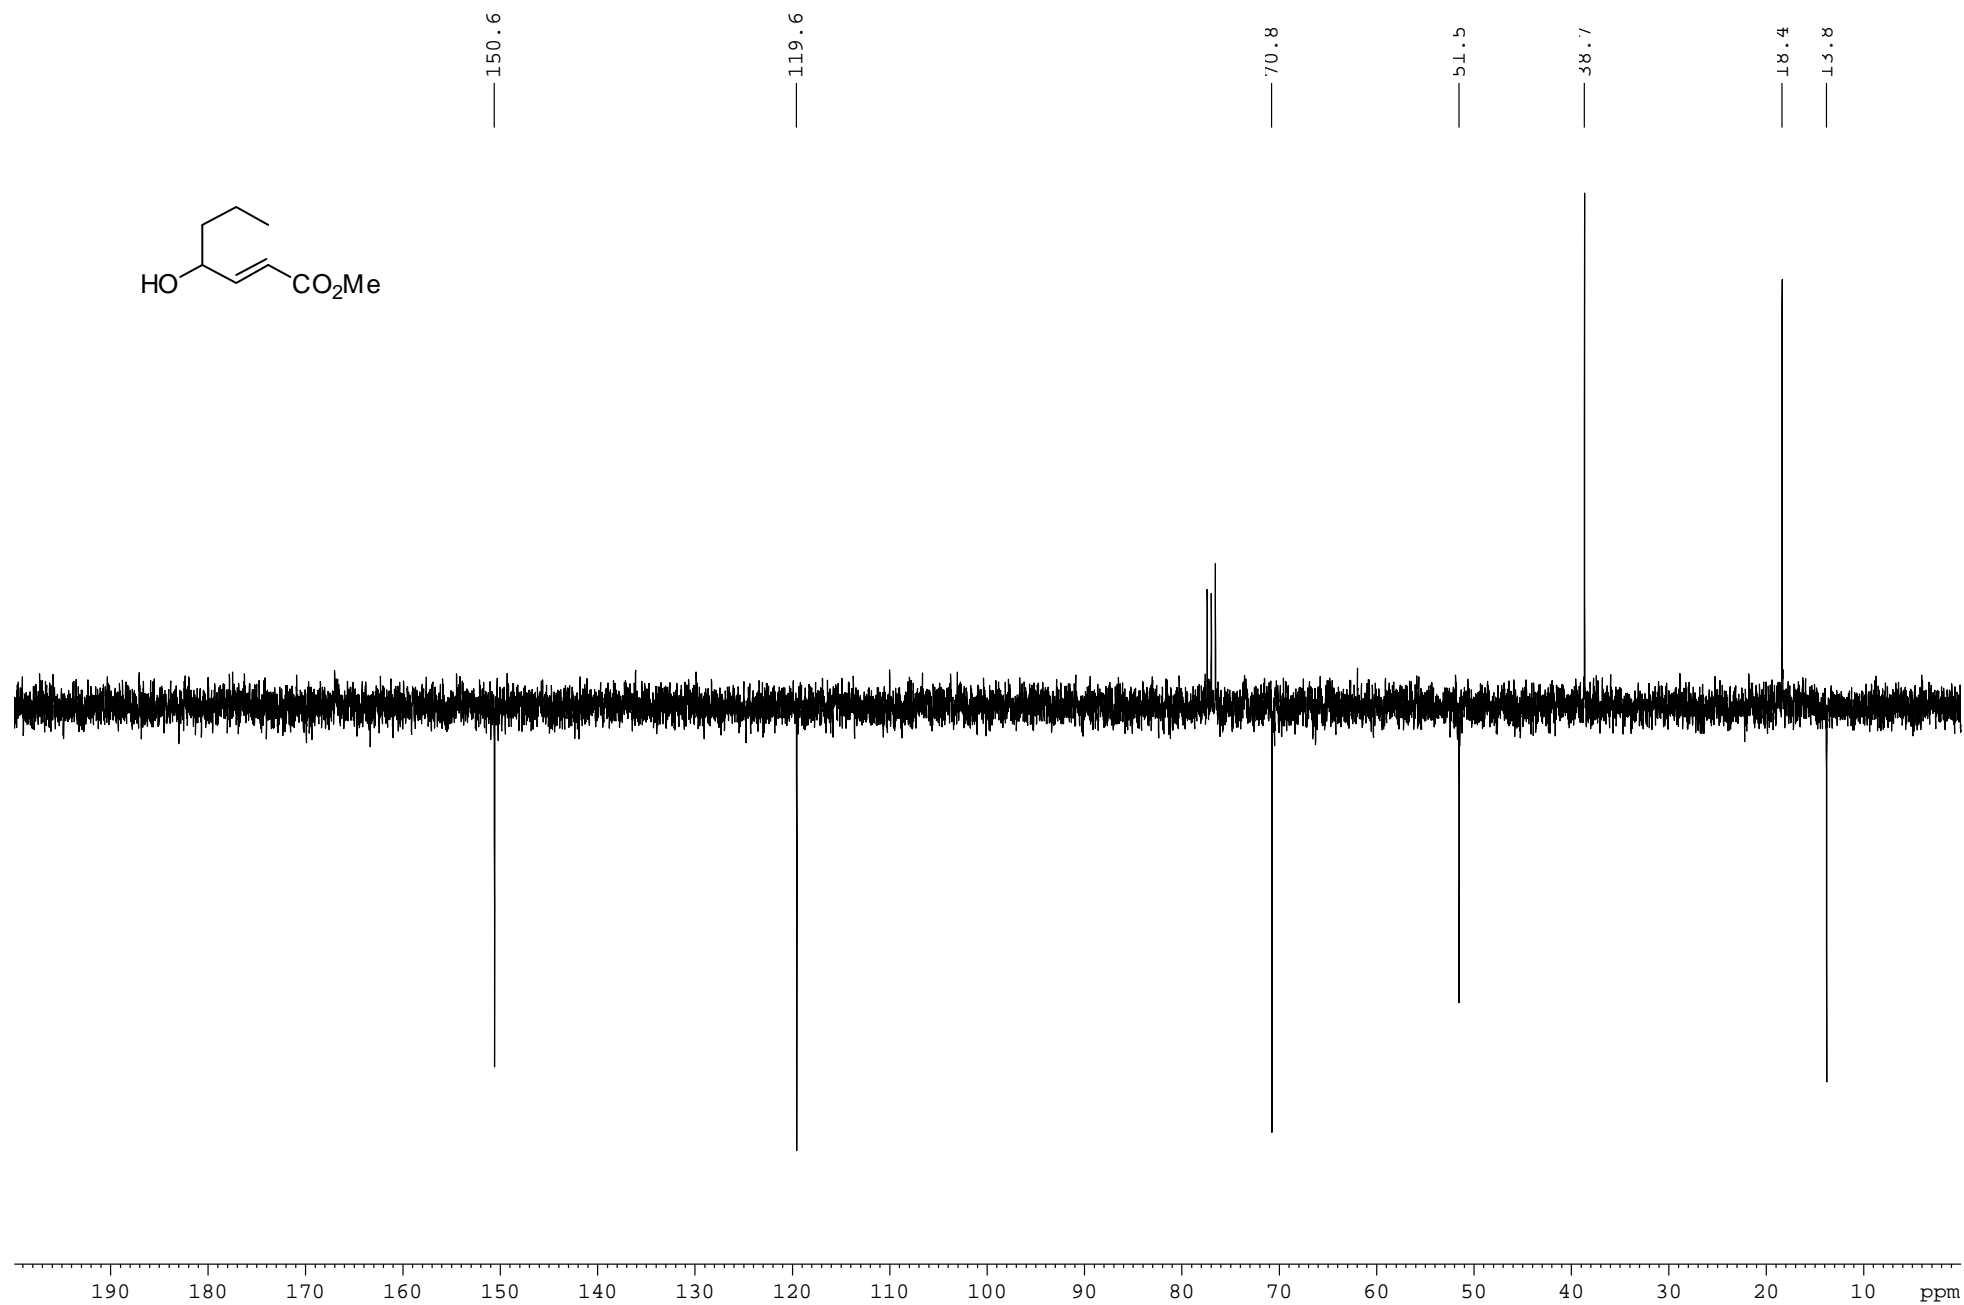

$^1\text{H}$  NMR ( $\text{CDCl}_3$  + drop of aceton- $\text{d}_6$ , 300 MHz) of **5o**

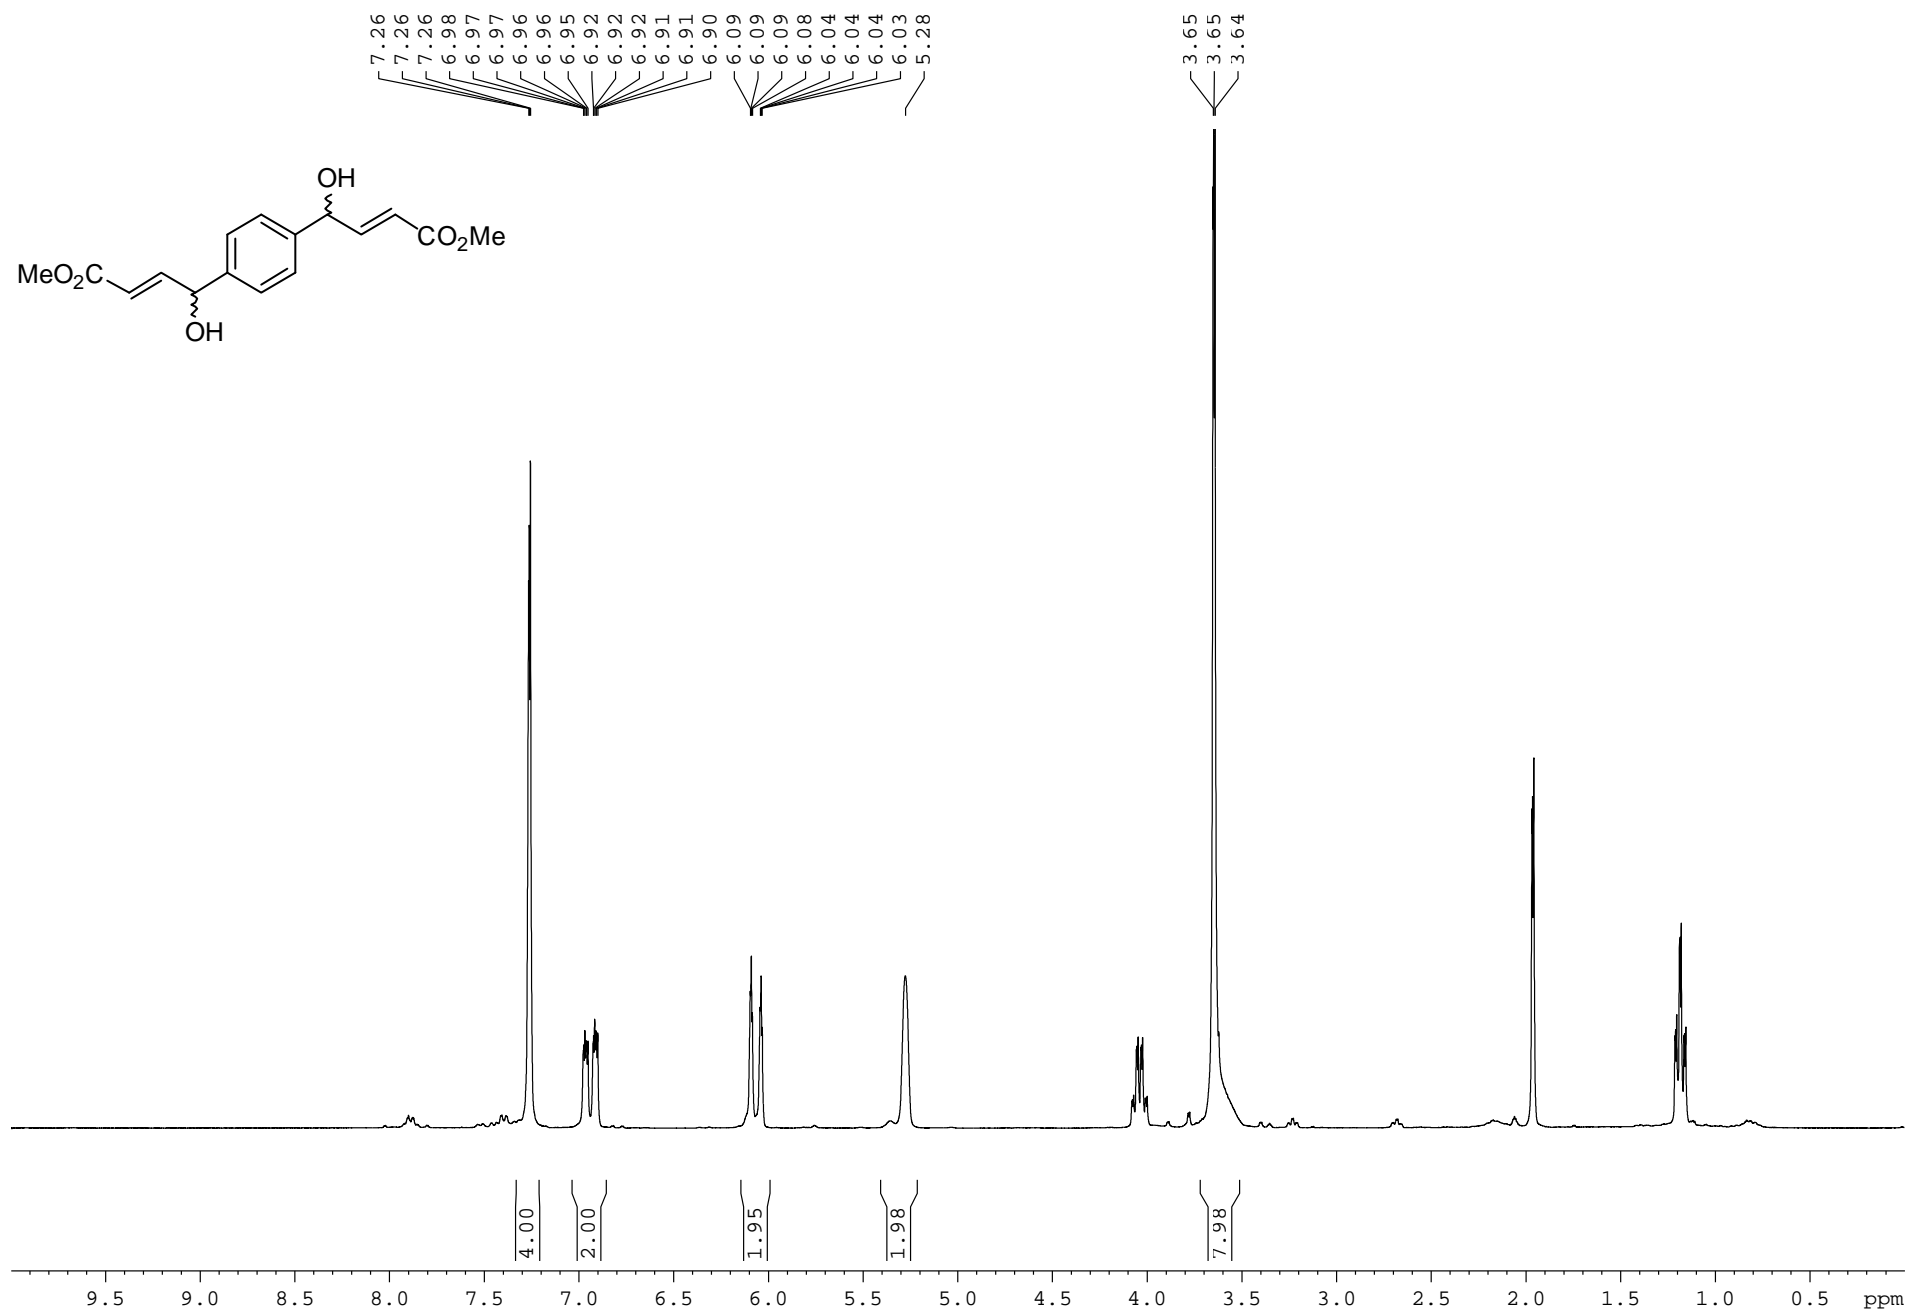

$^{13}\text{C}$  NMR-APT ( $\text{CDCl}_3$  + drop of aceton- $\text{d}_6$ , 75 MHz) of **5o**

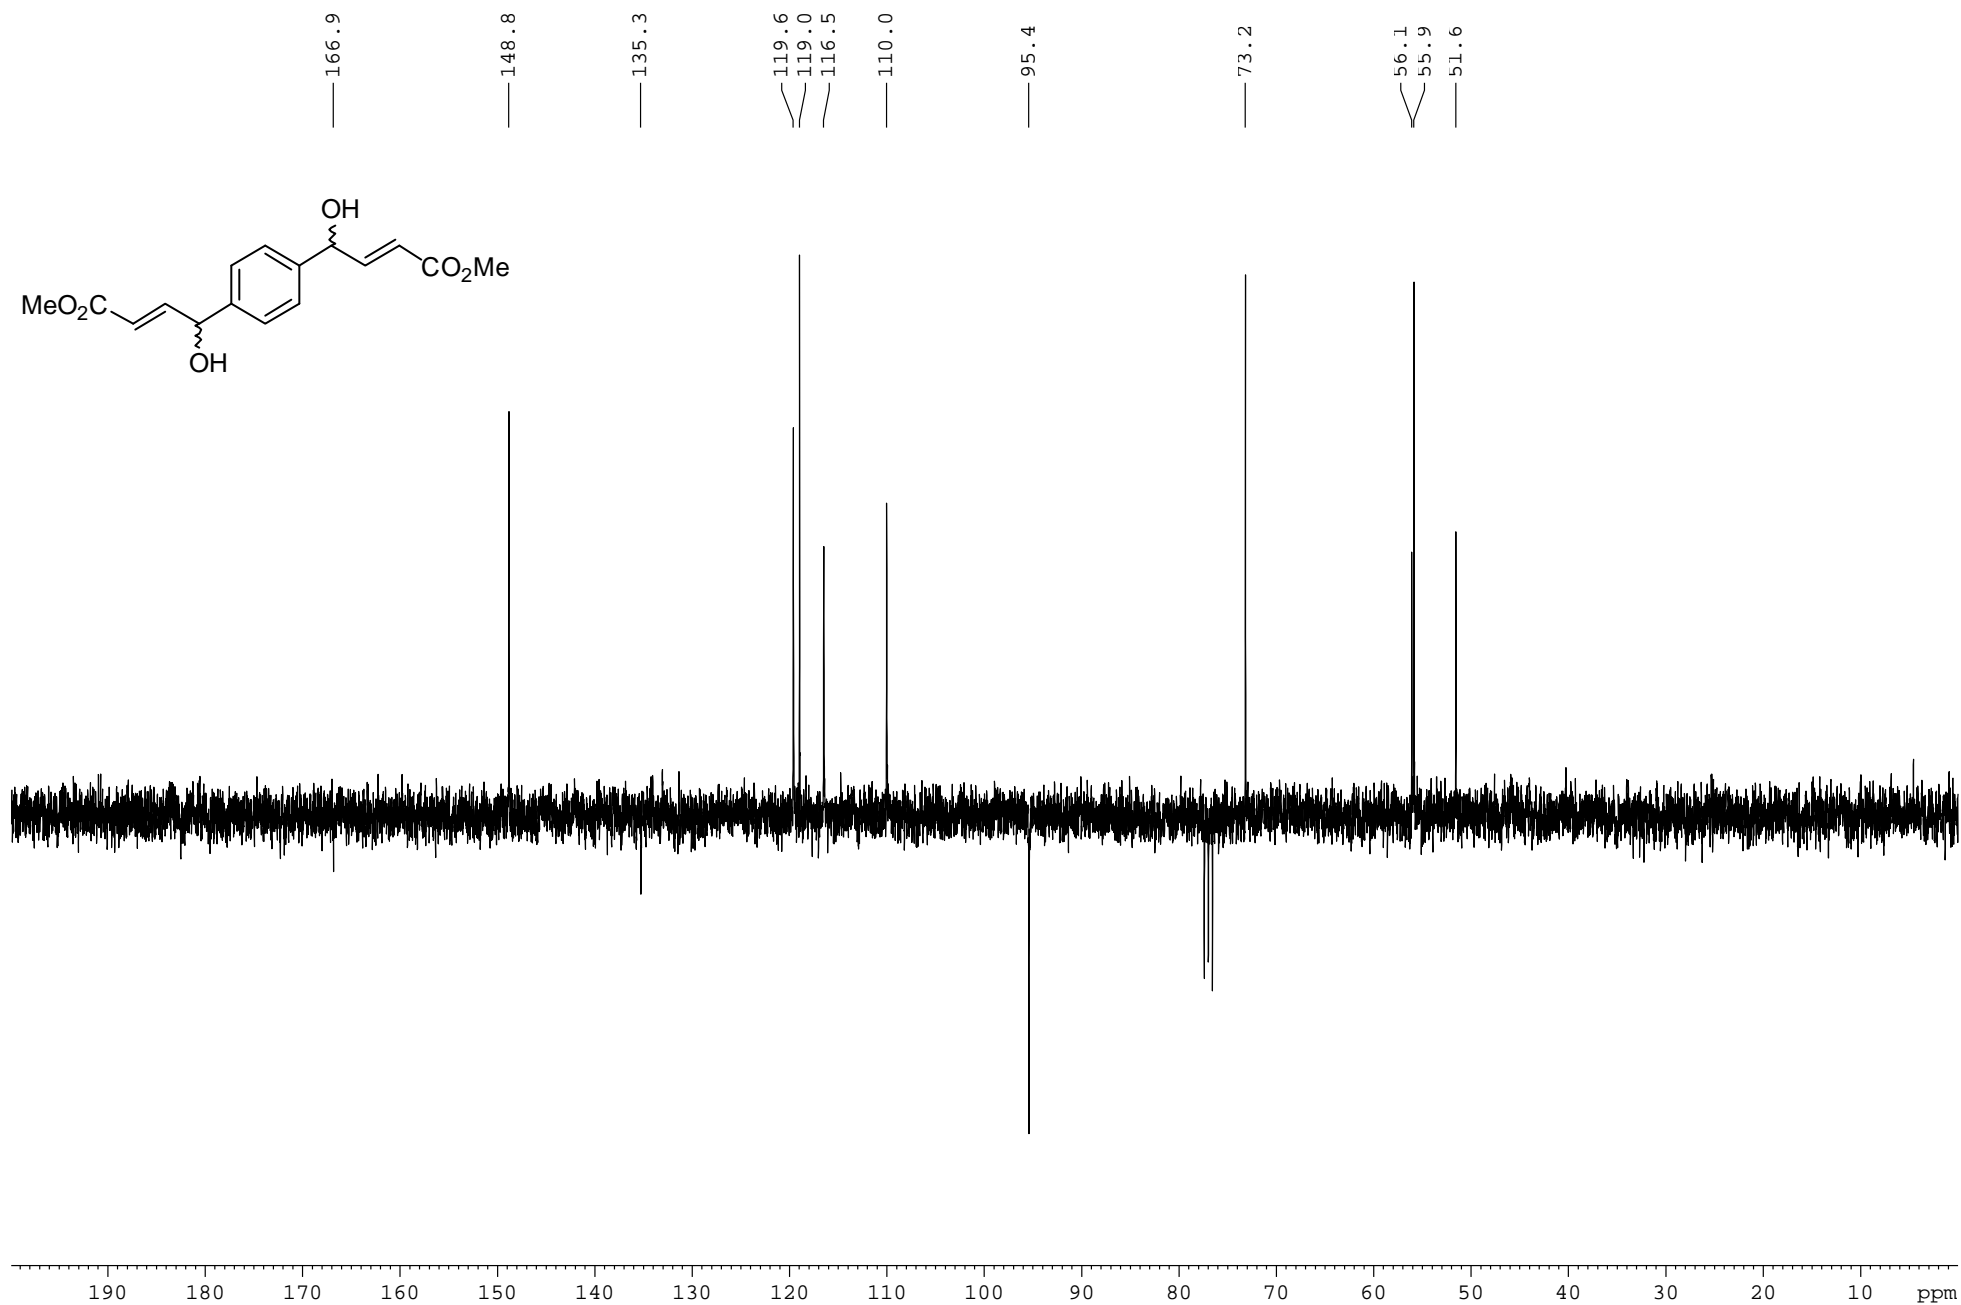

$^1\text{H}$  NMR ( $\text{CDCl}_3$ , 300 MHz) of **5p**

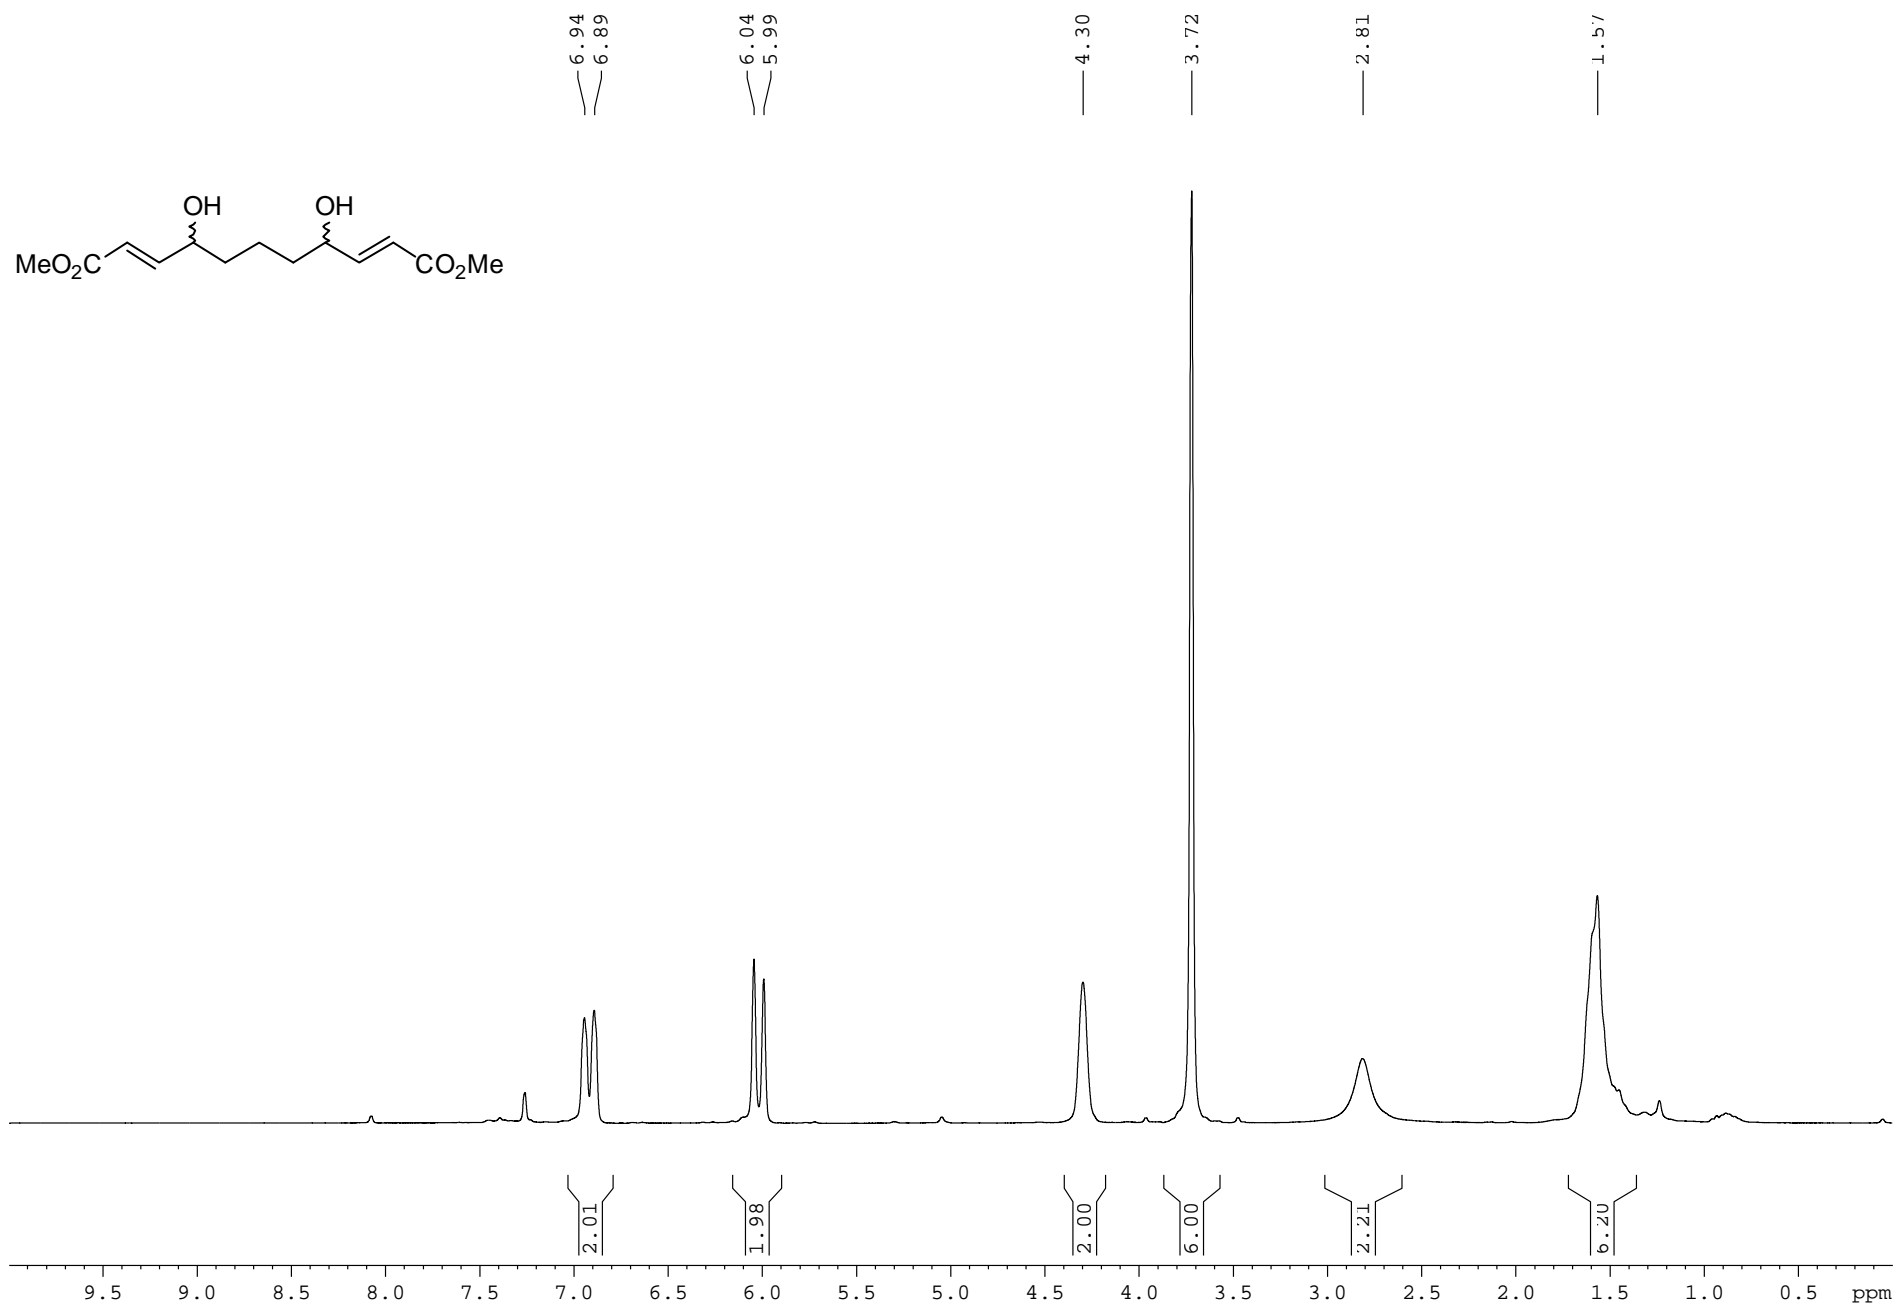

$^{13}\text{C}$  NMR-APT ( $\text{CDCl}_3$ , 75 MHz) of **5p**

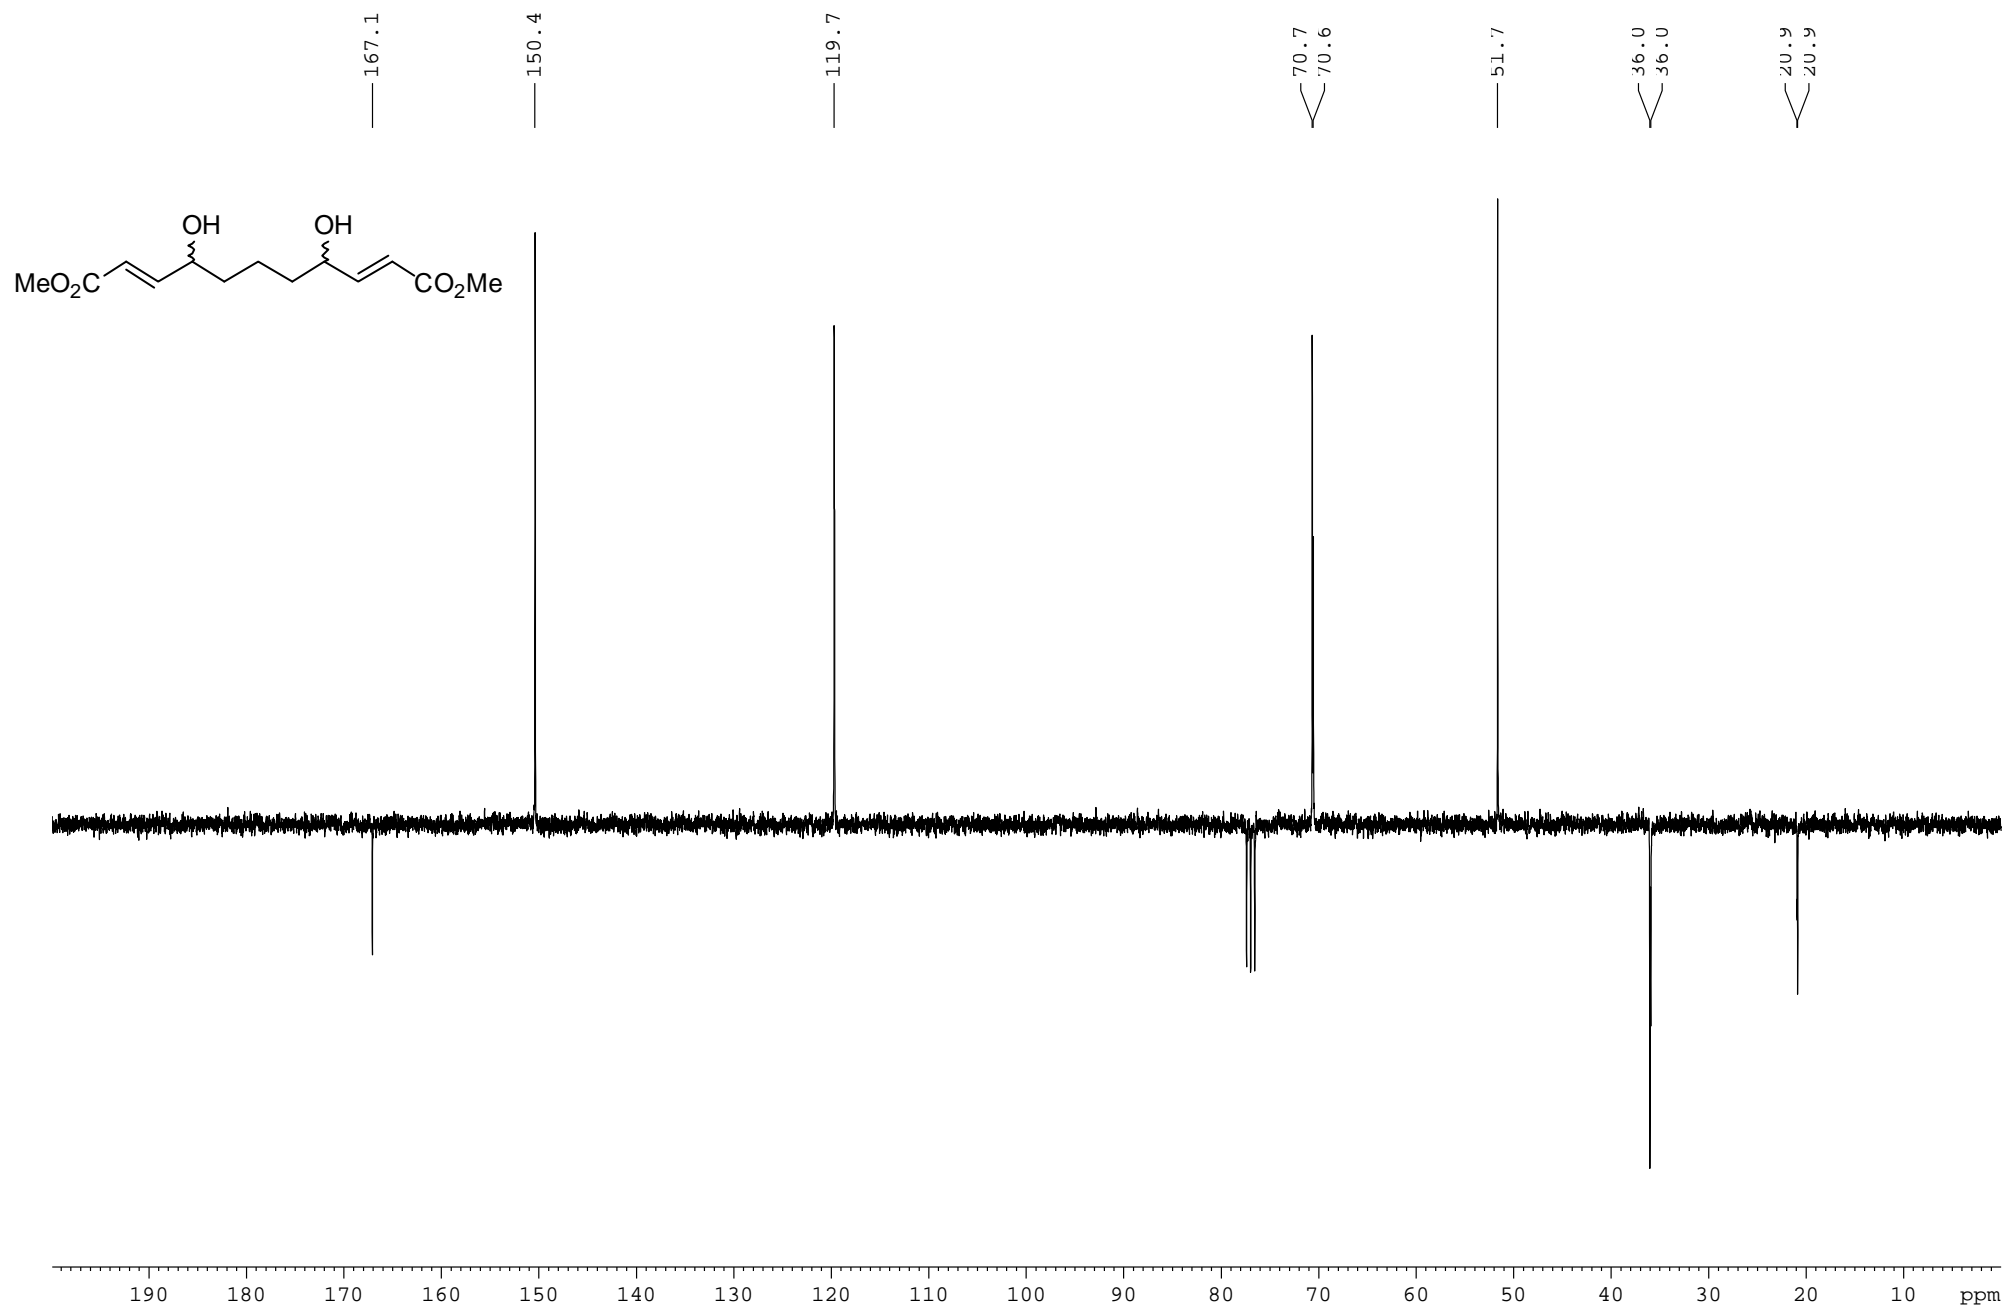

**D Copies of NMR spectra of cross metathesis/isomerization products 6**

<sup>1</sup>H NMR (CDCl<sub>3</sub>, 300 MHz) of **6a**

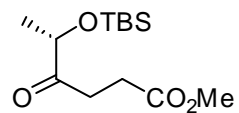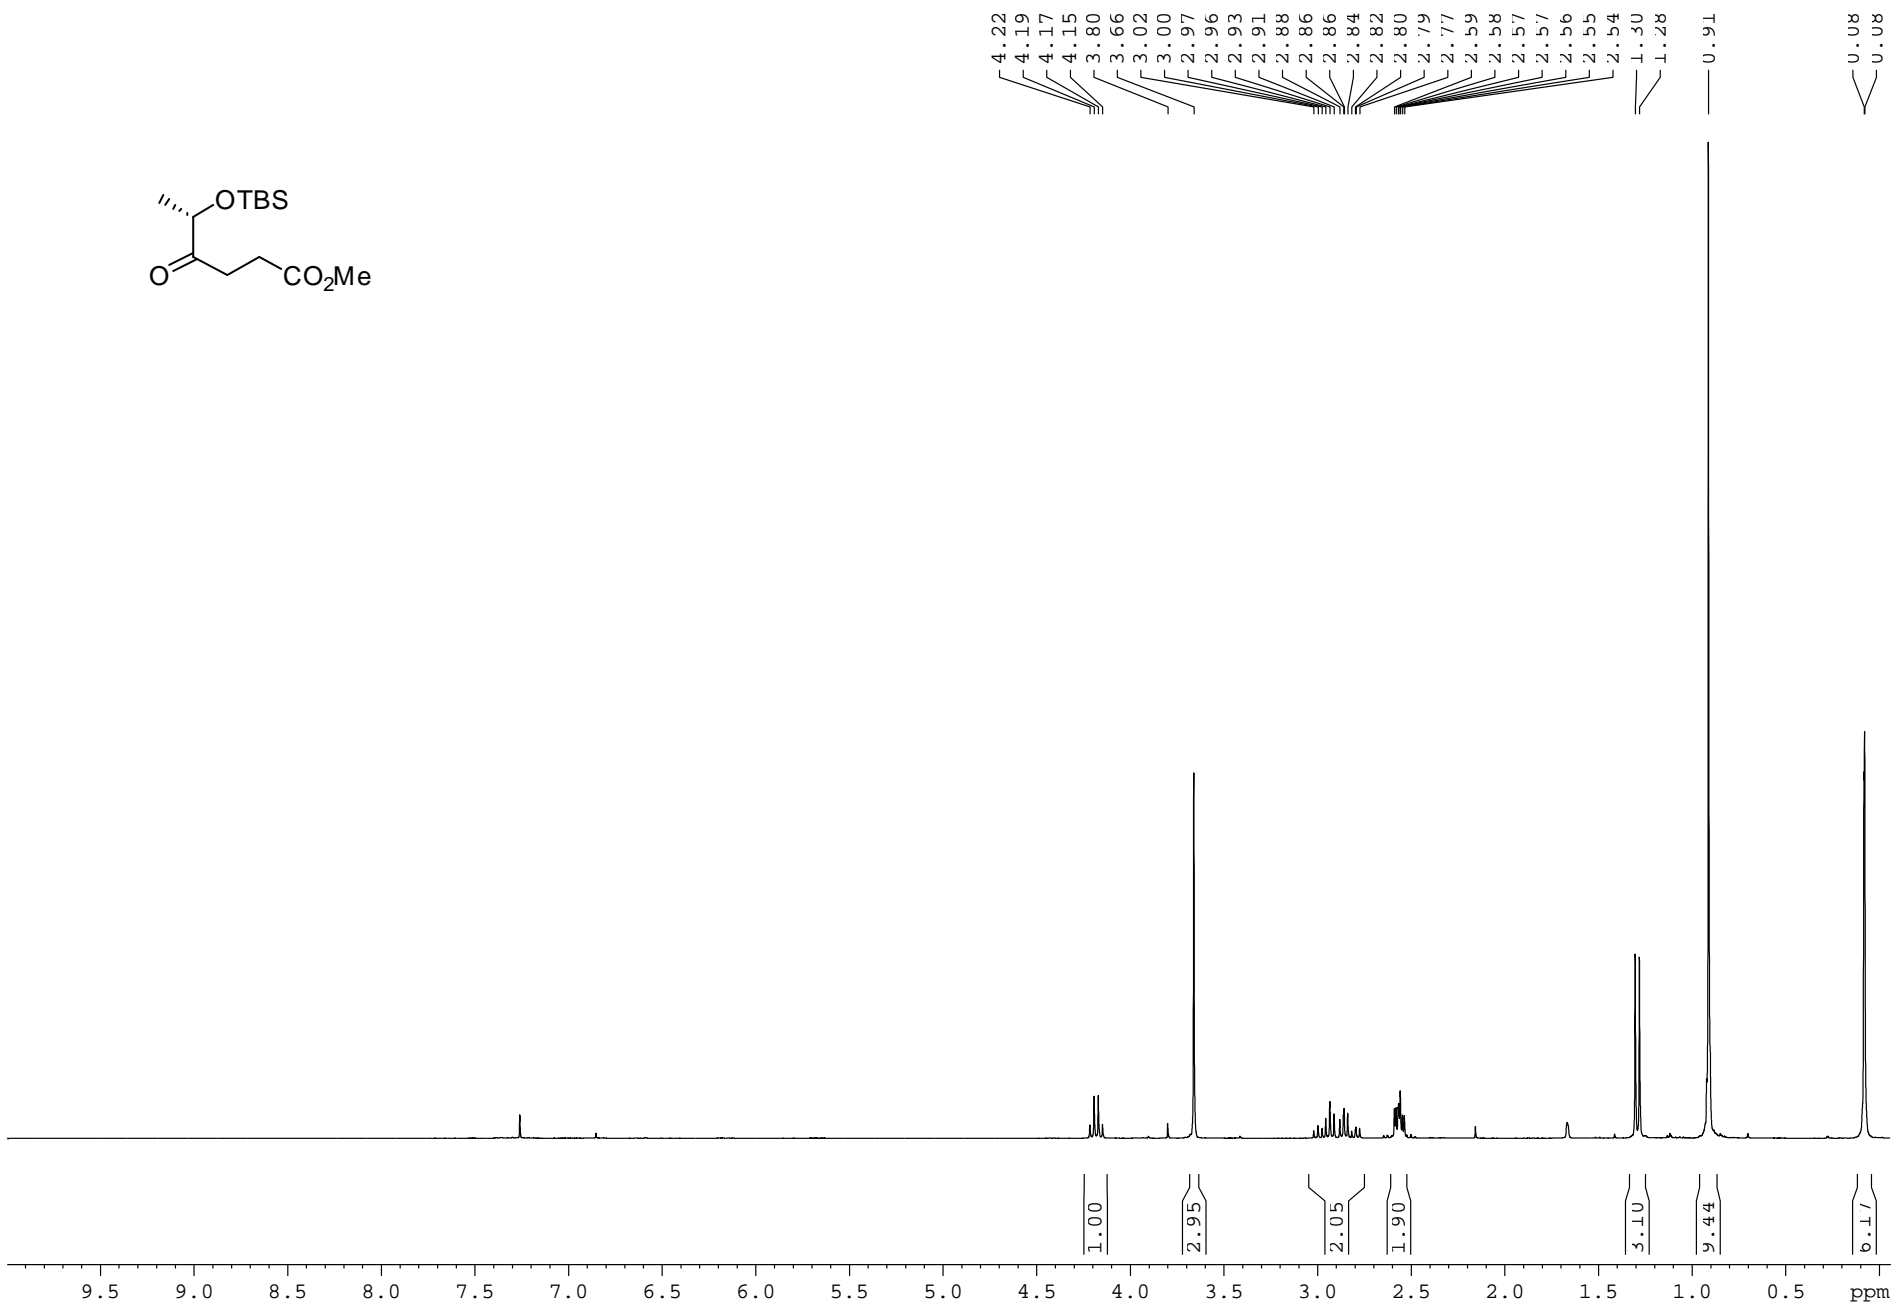

$^{13}\text{C}$  NMR-APT ( $\text{CDCl}_3$ , 75 MHz) of **6a**

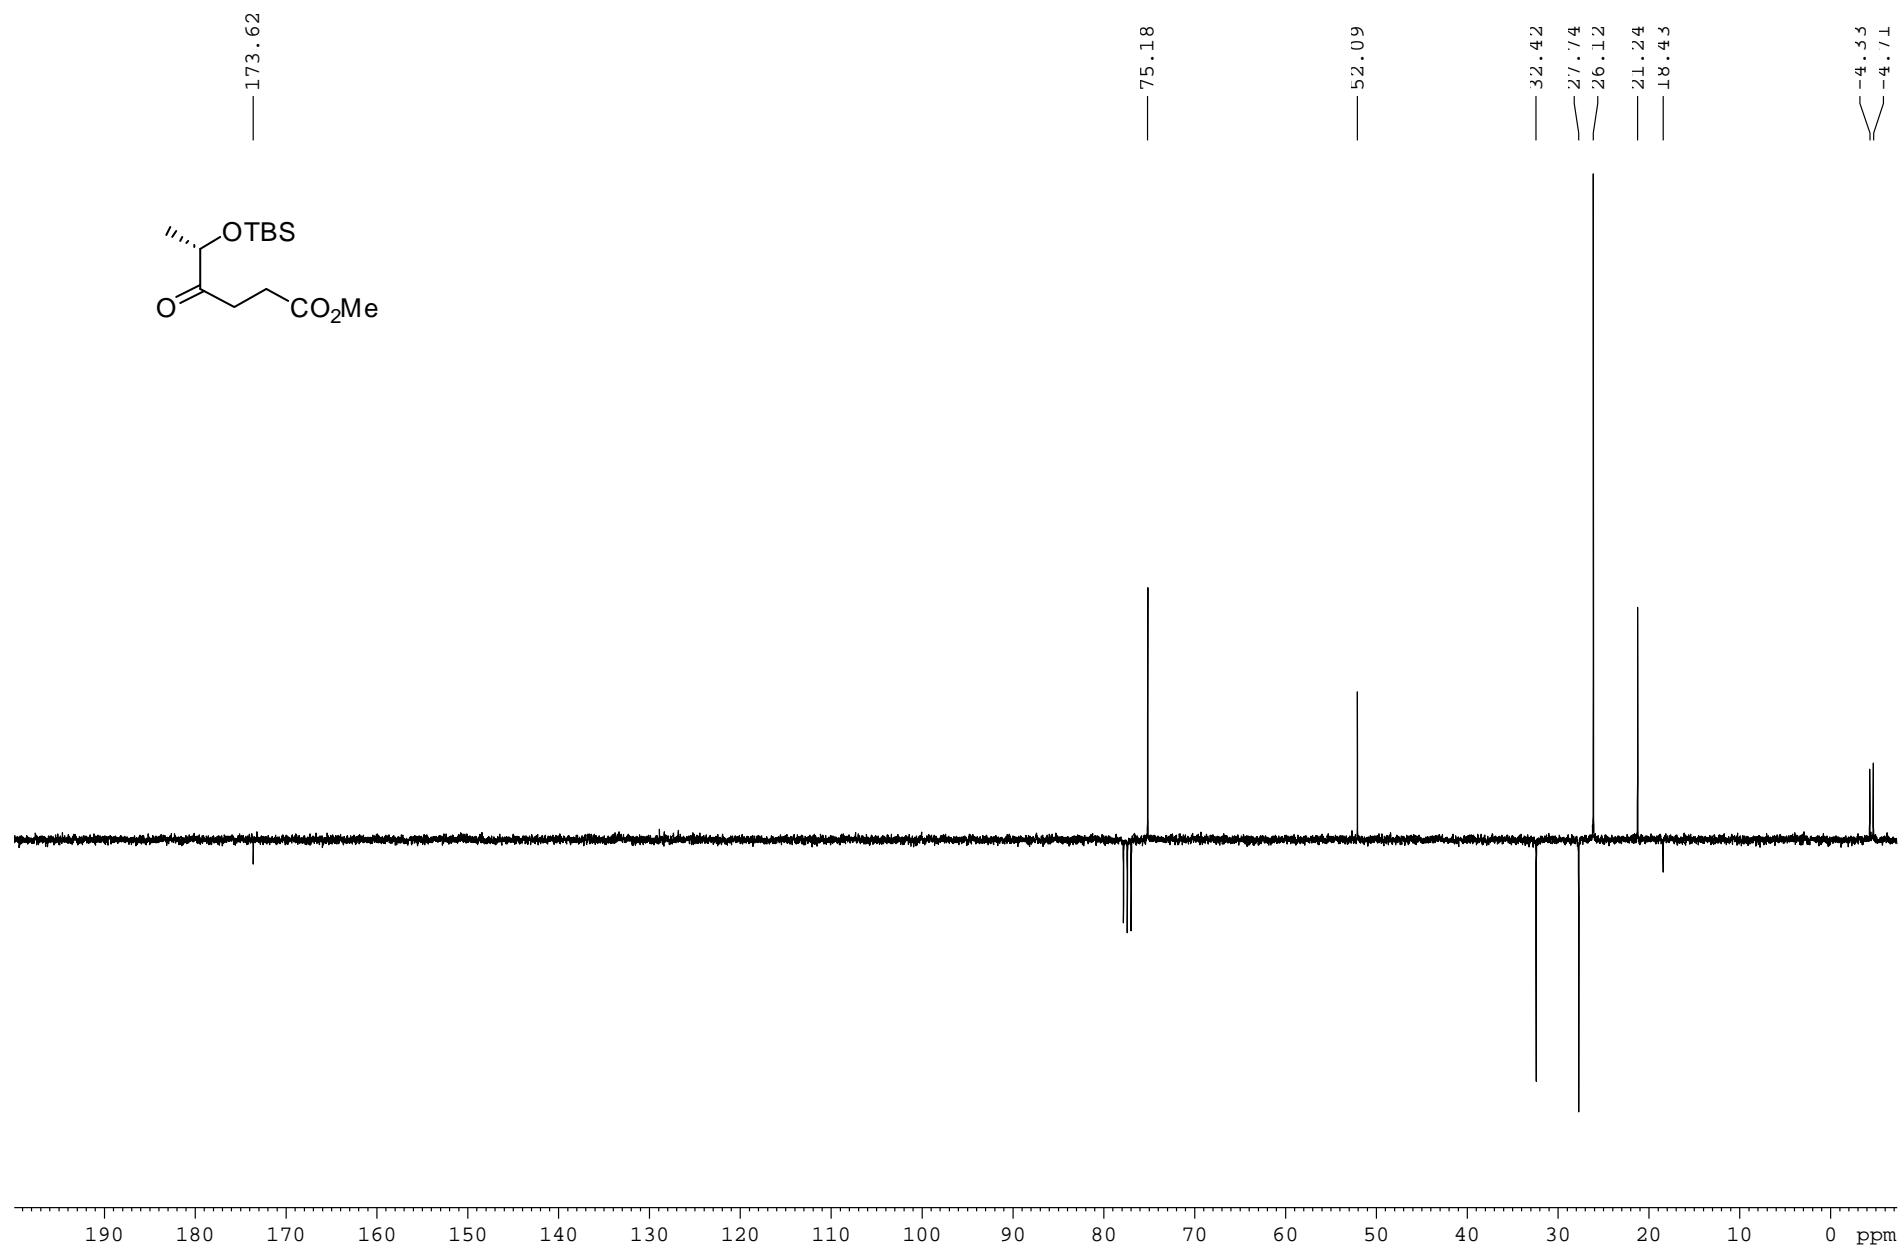

$^1\text{H}$  NMR ( $\text{CDCl}_3$ , 300 MHz) of **6b**

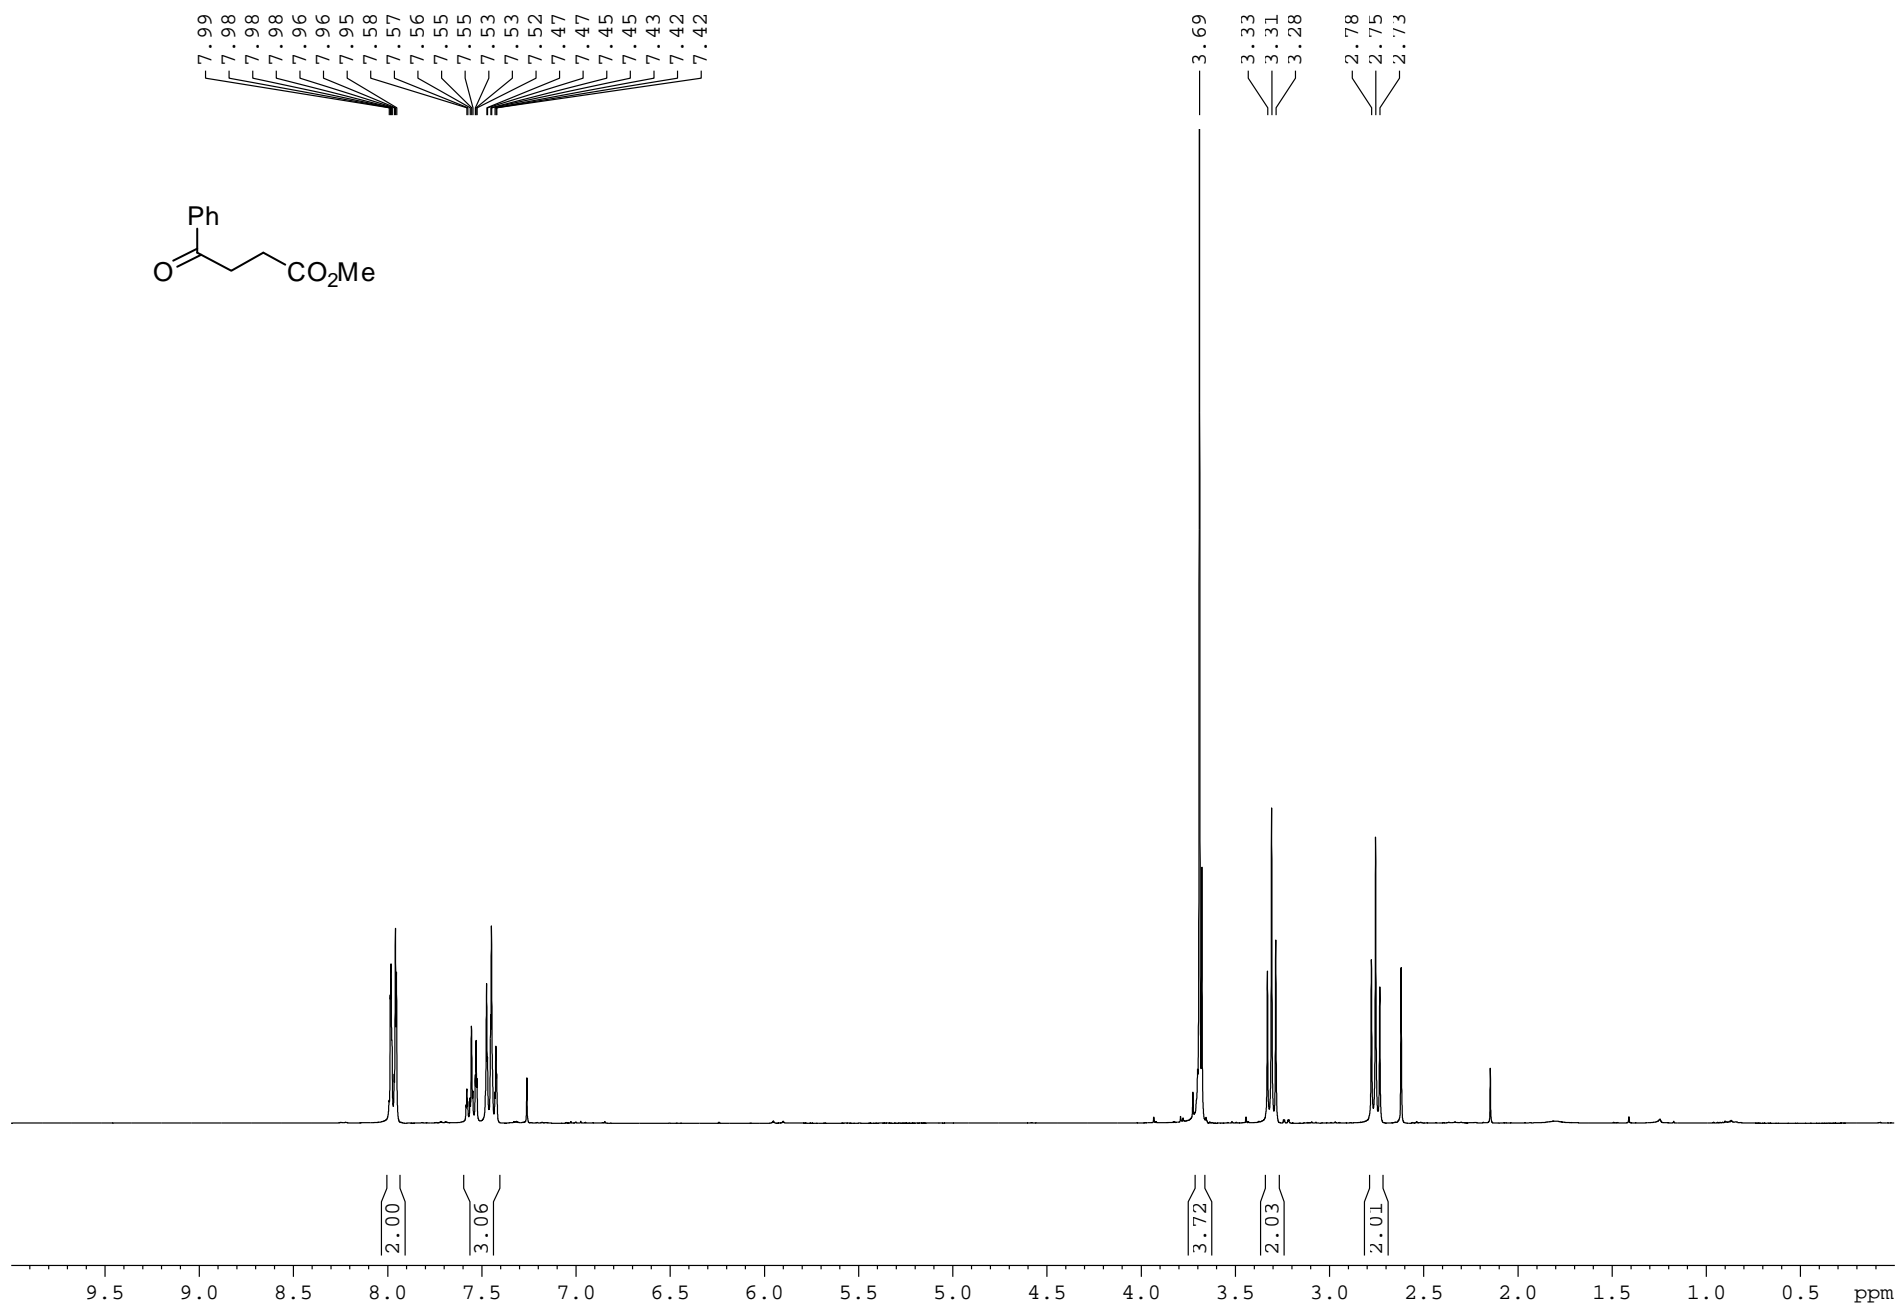



$^{13}\text{C}$  NMR-APT ( $\text{CDCl}_3$ , 75 MHz) of **6b**

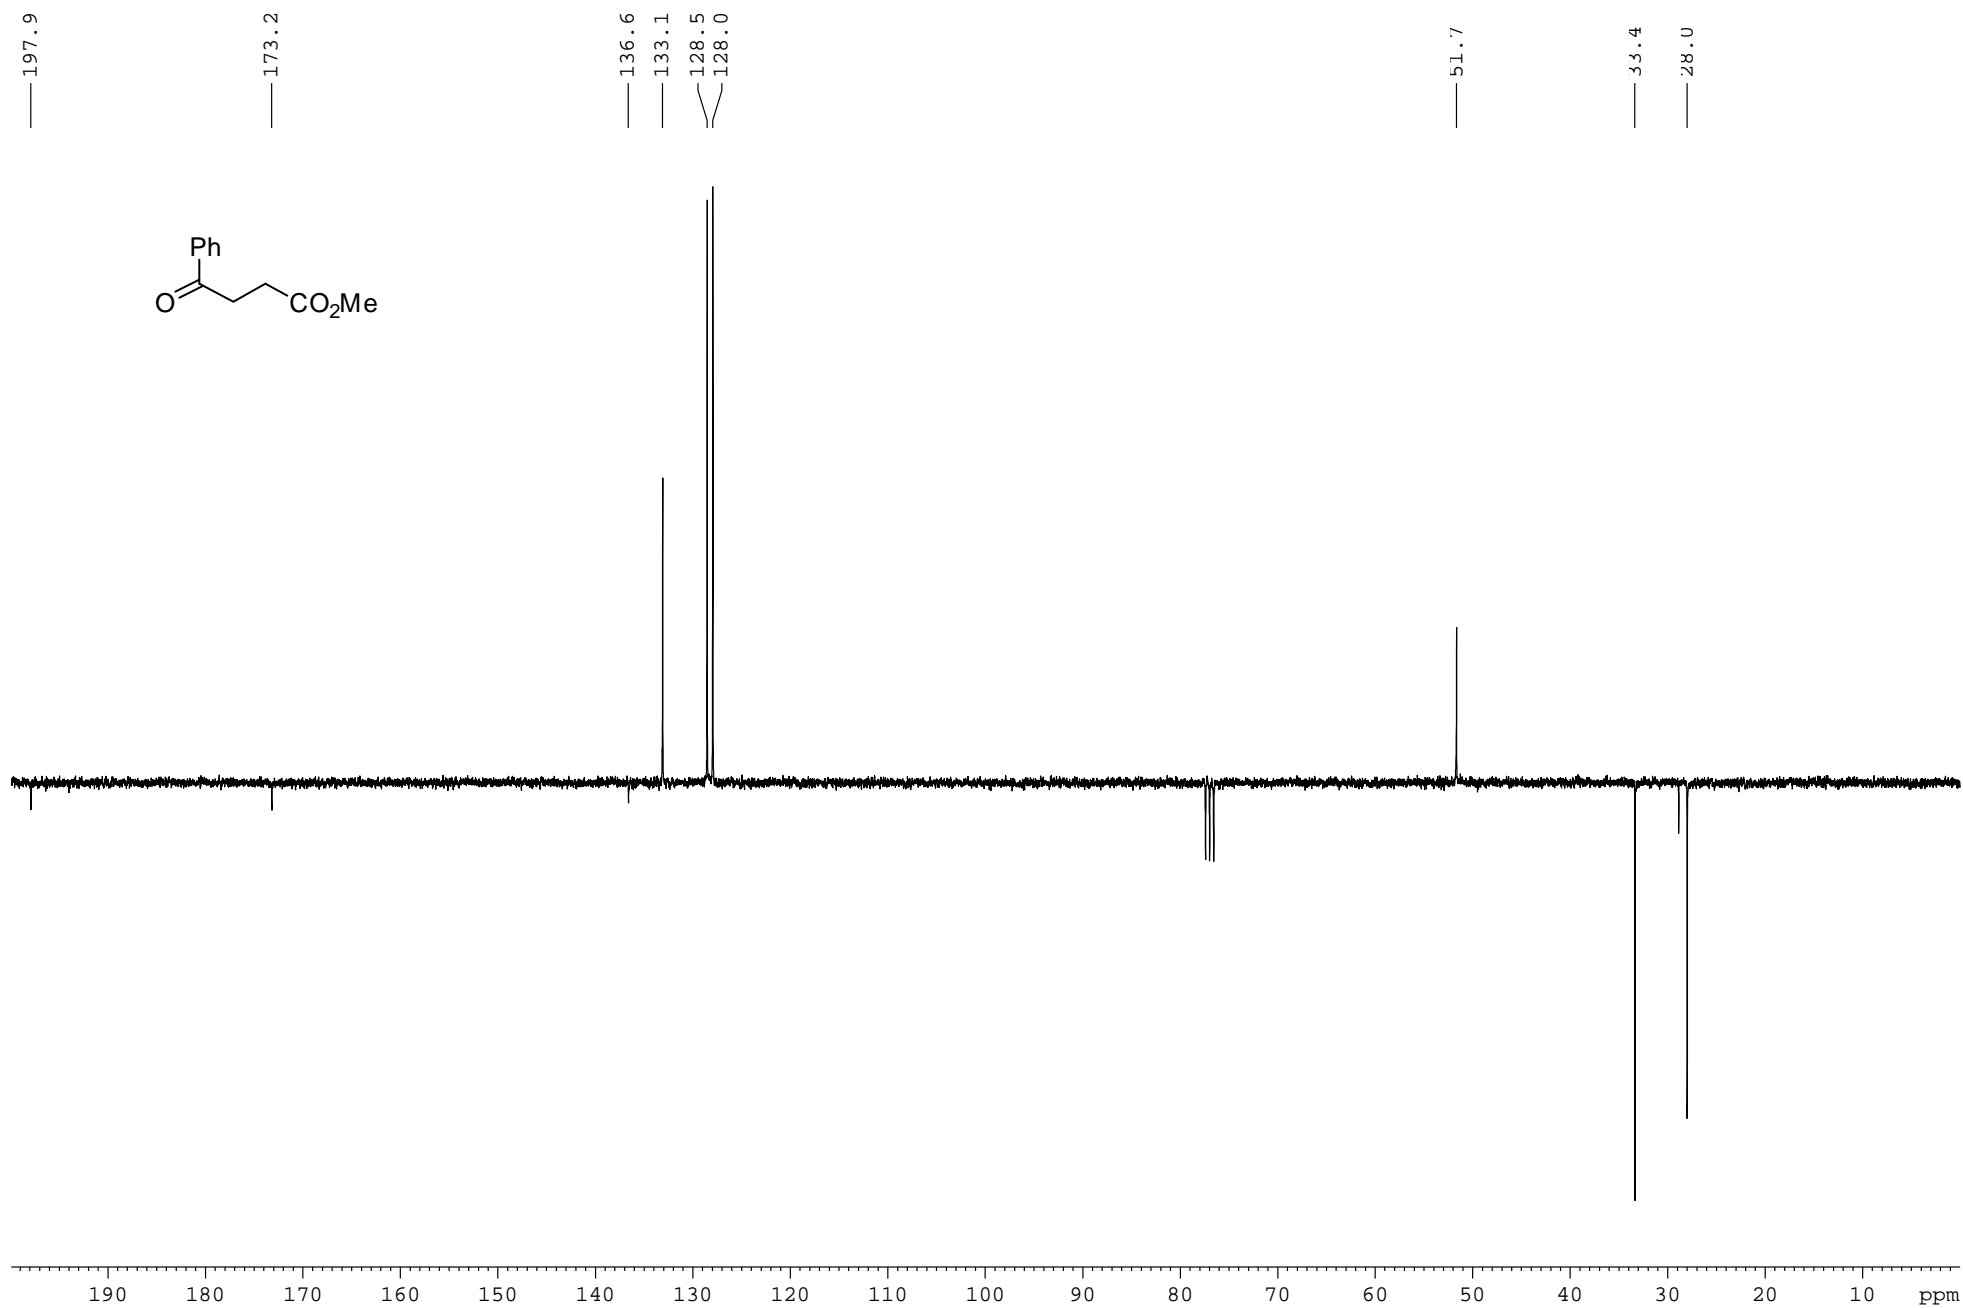

$^1\text{H}$  NMR ( $\text{CDCl}_3$ , 300 MHz) of **6c**

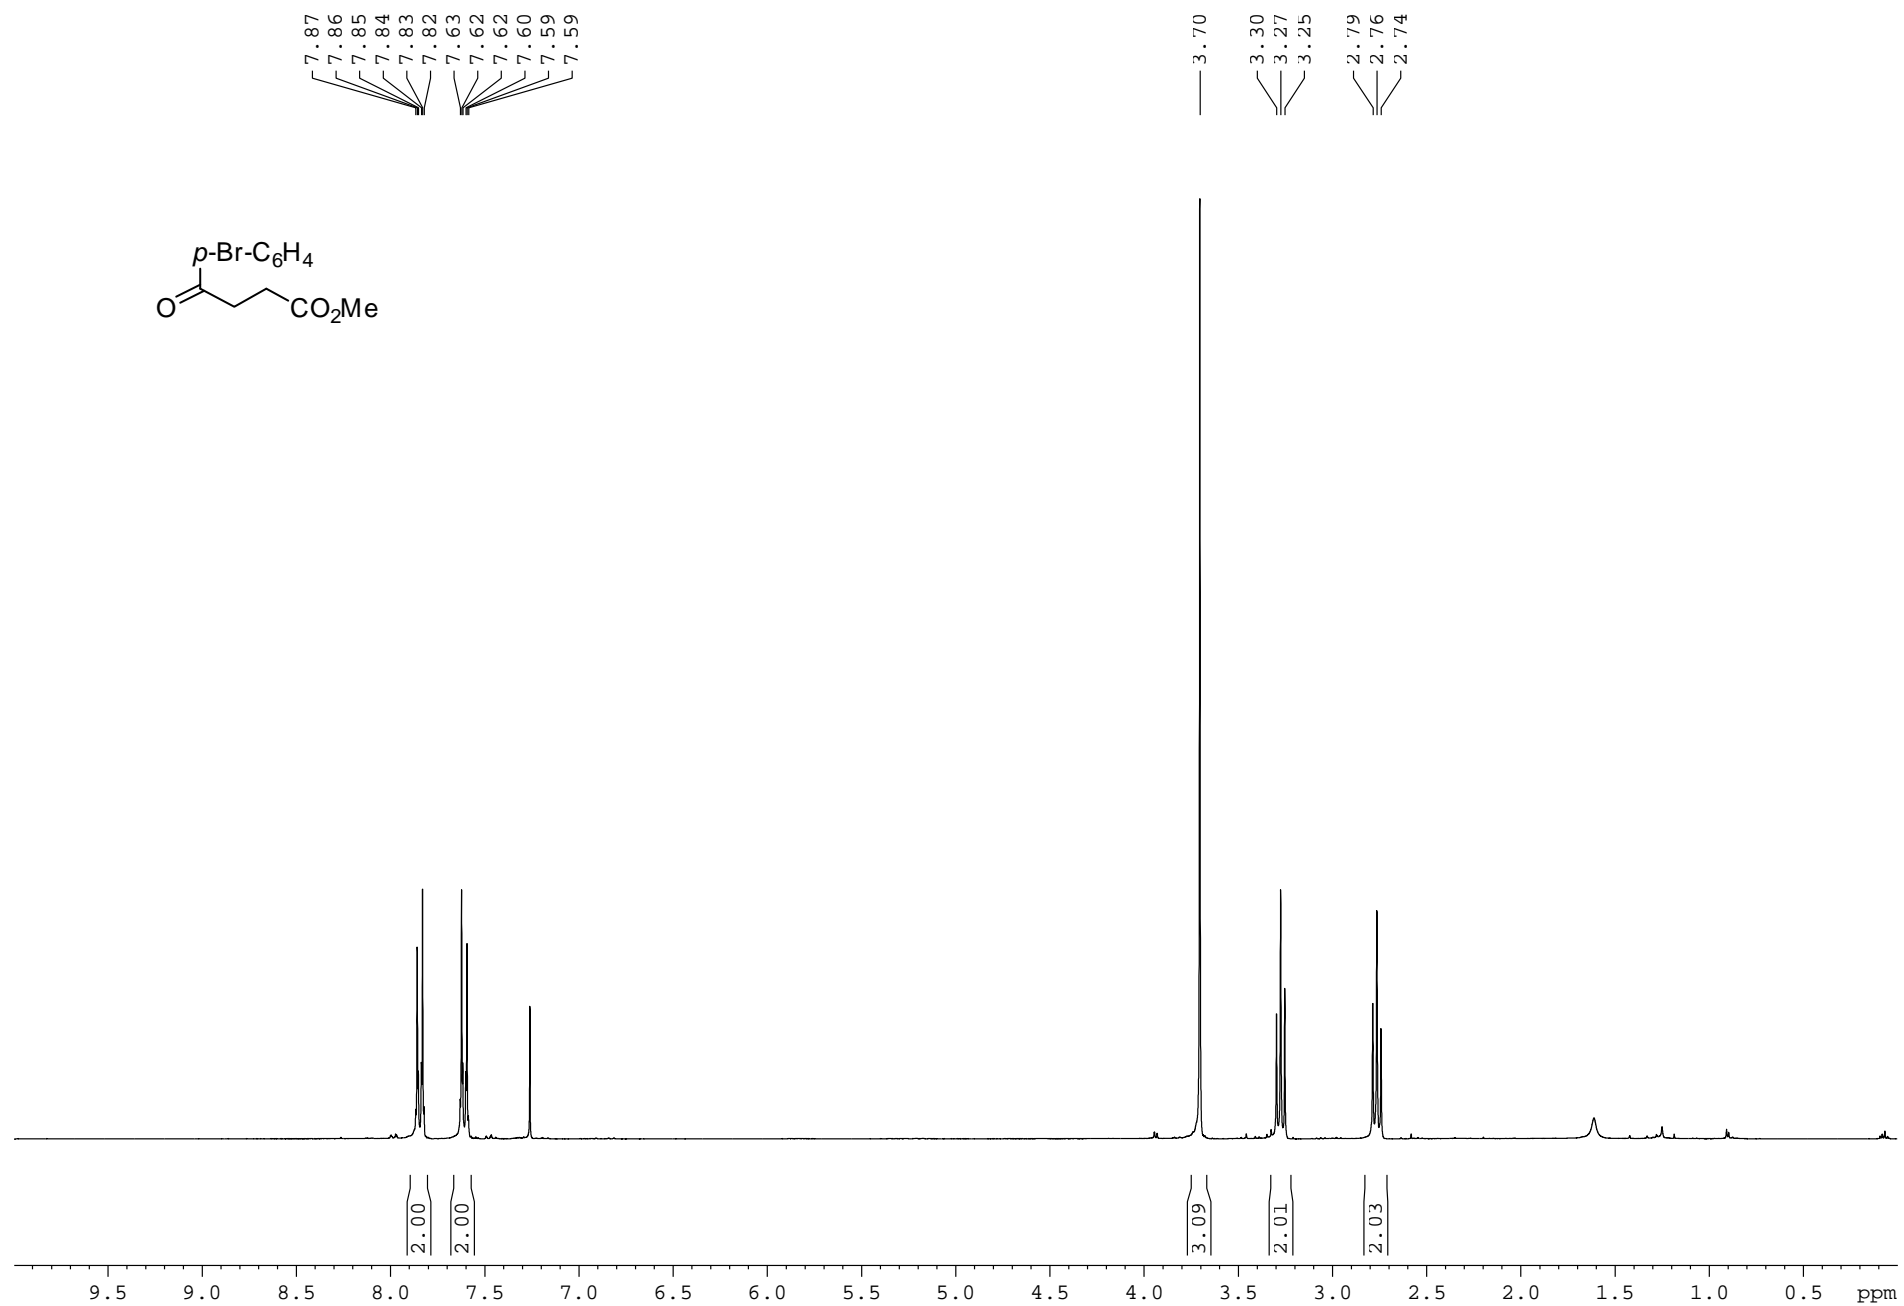

$^{13}\text{C}$  NMR-APT ( $\text{CDCl}_3$ , 75 MHz) of **6c**

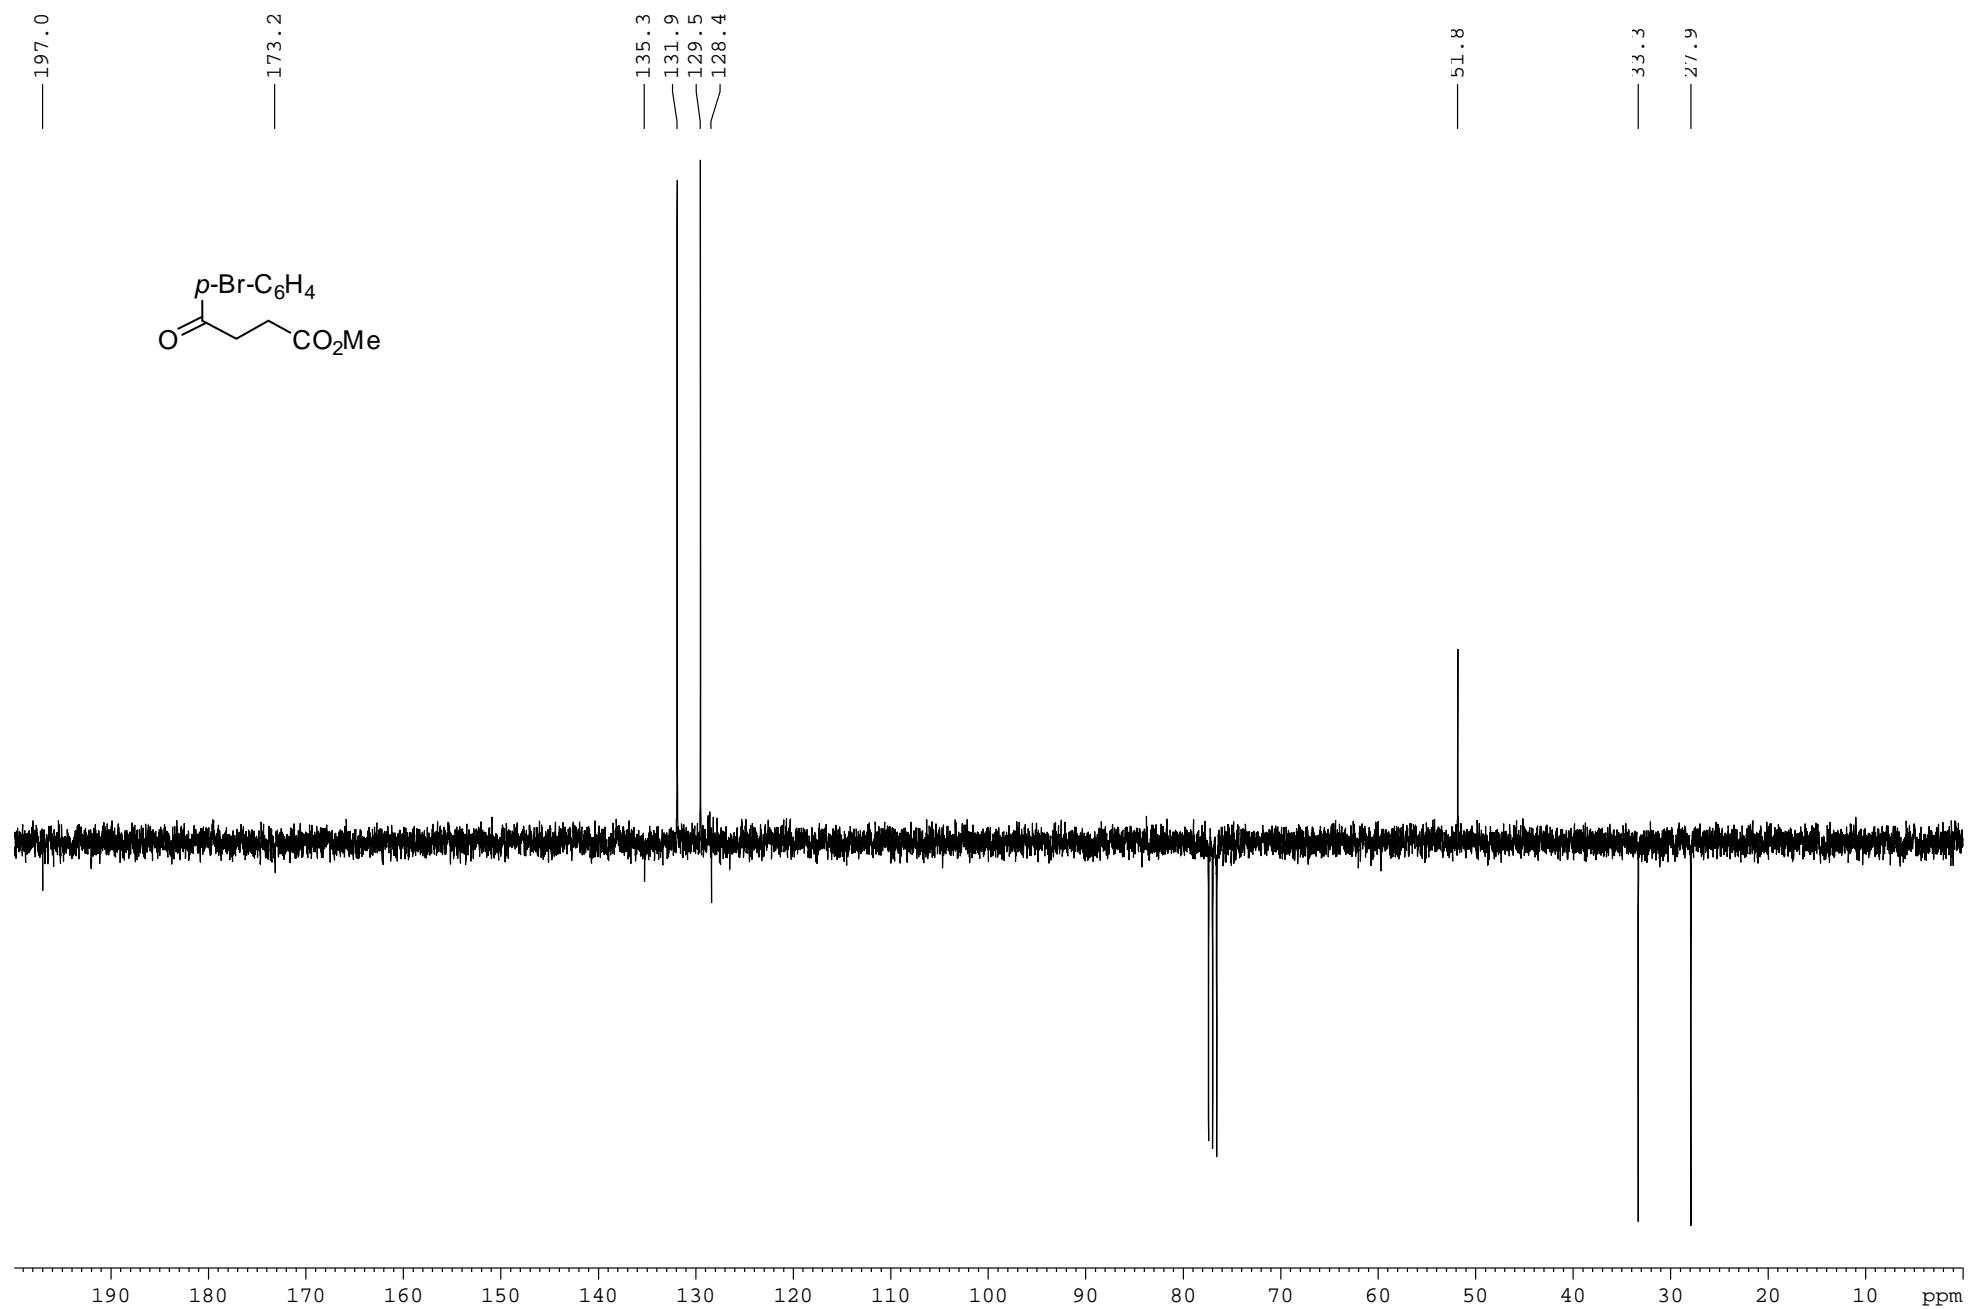

$^1\text{H}$  NMR ( $\text{CDCl}_3$ , 300 MHz) of **6d**

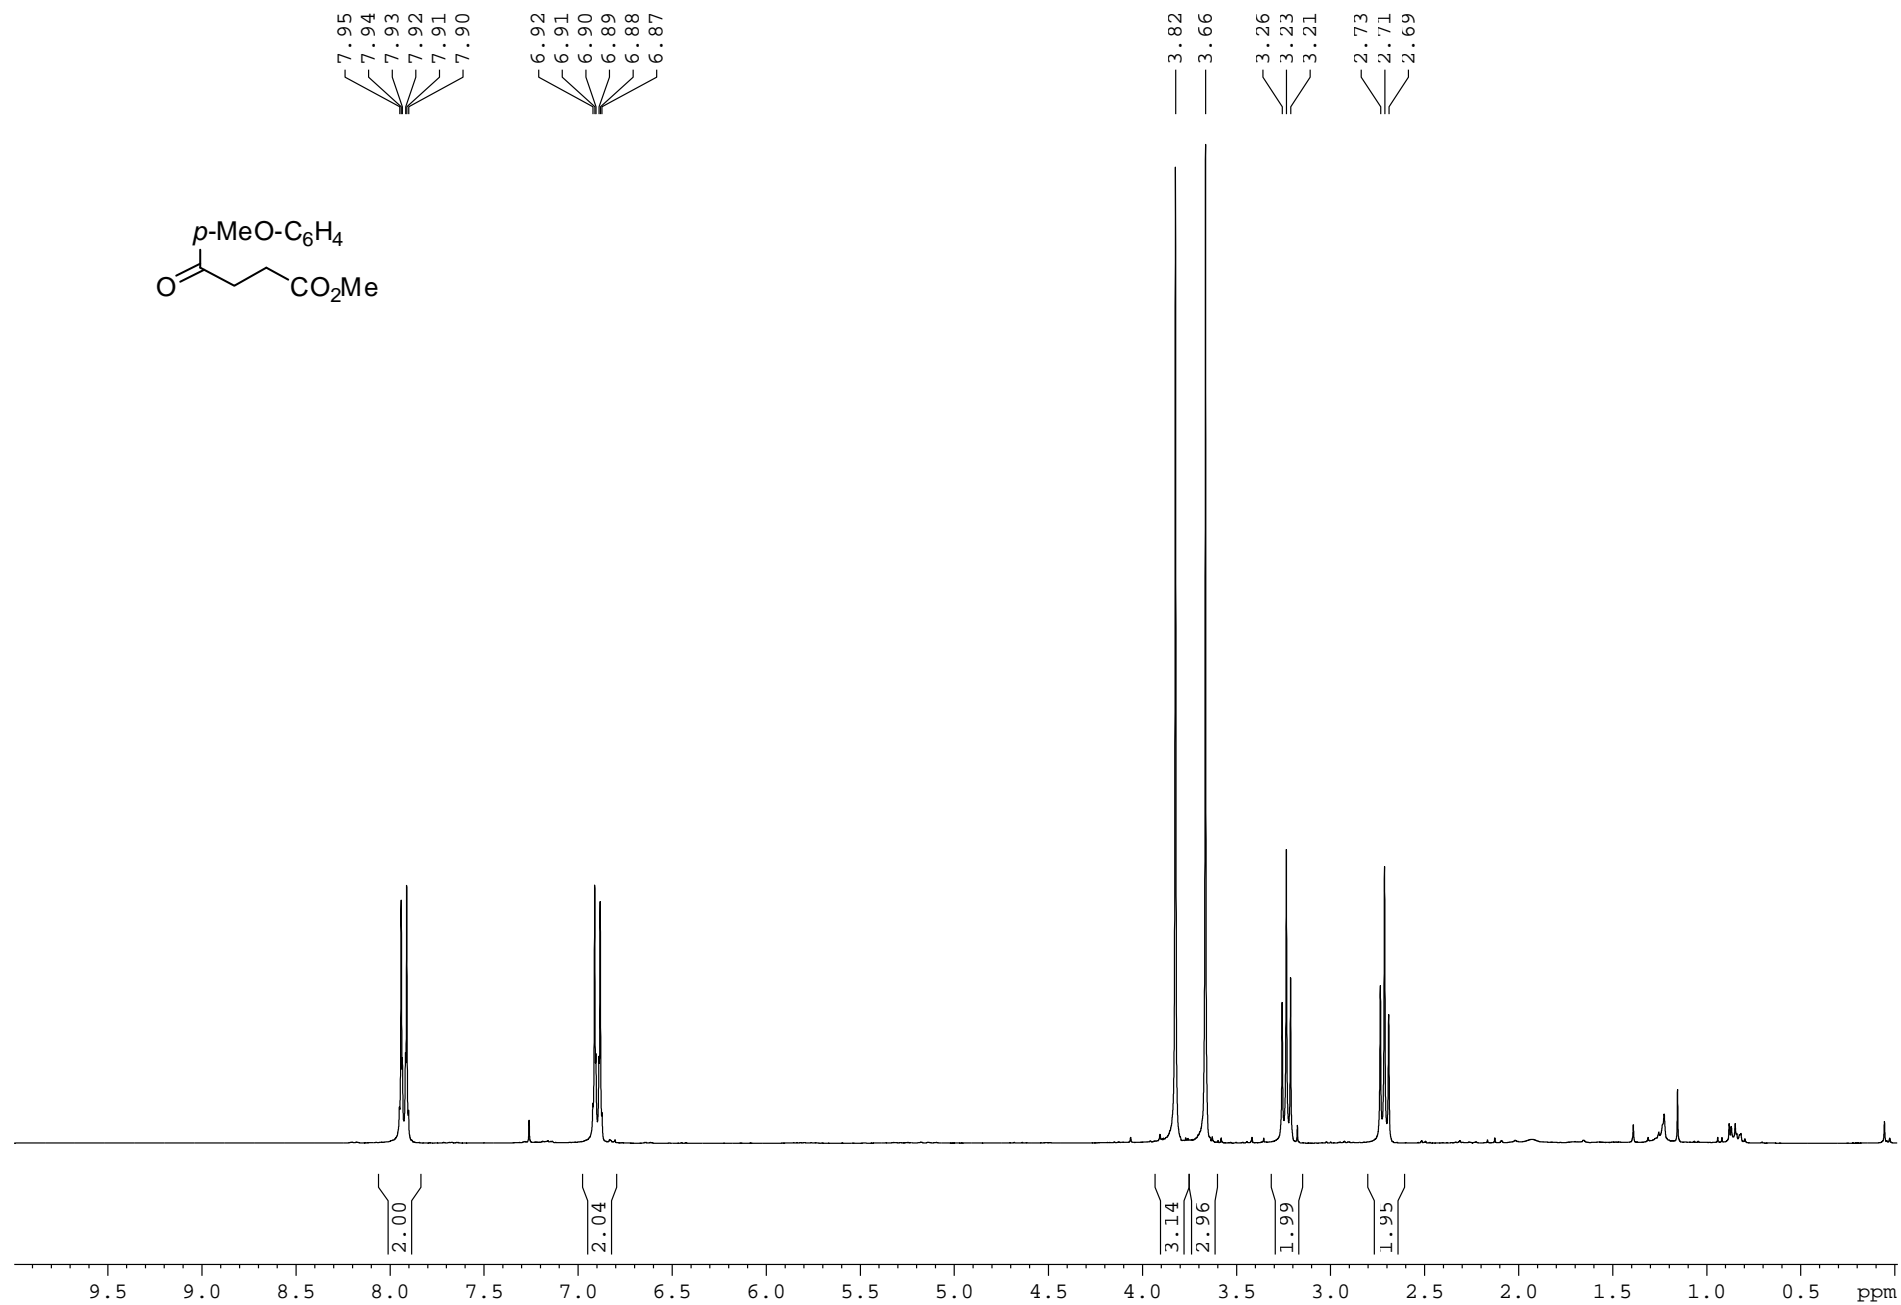

$^{13}\text{C}$  NMR-APT ( $\text{CDCl}_3$ , 75 MHz) of **6d**

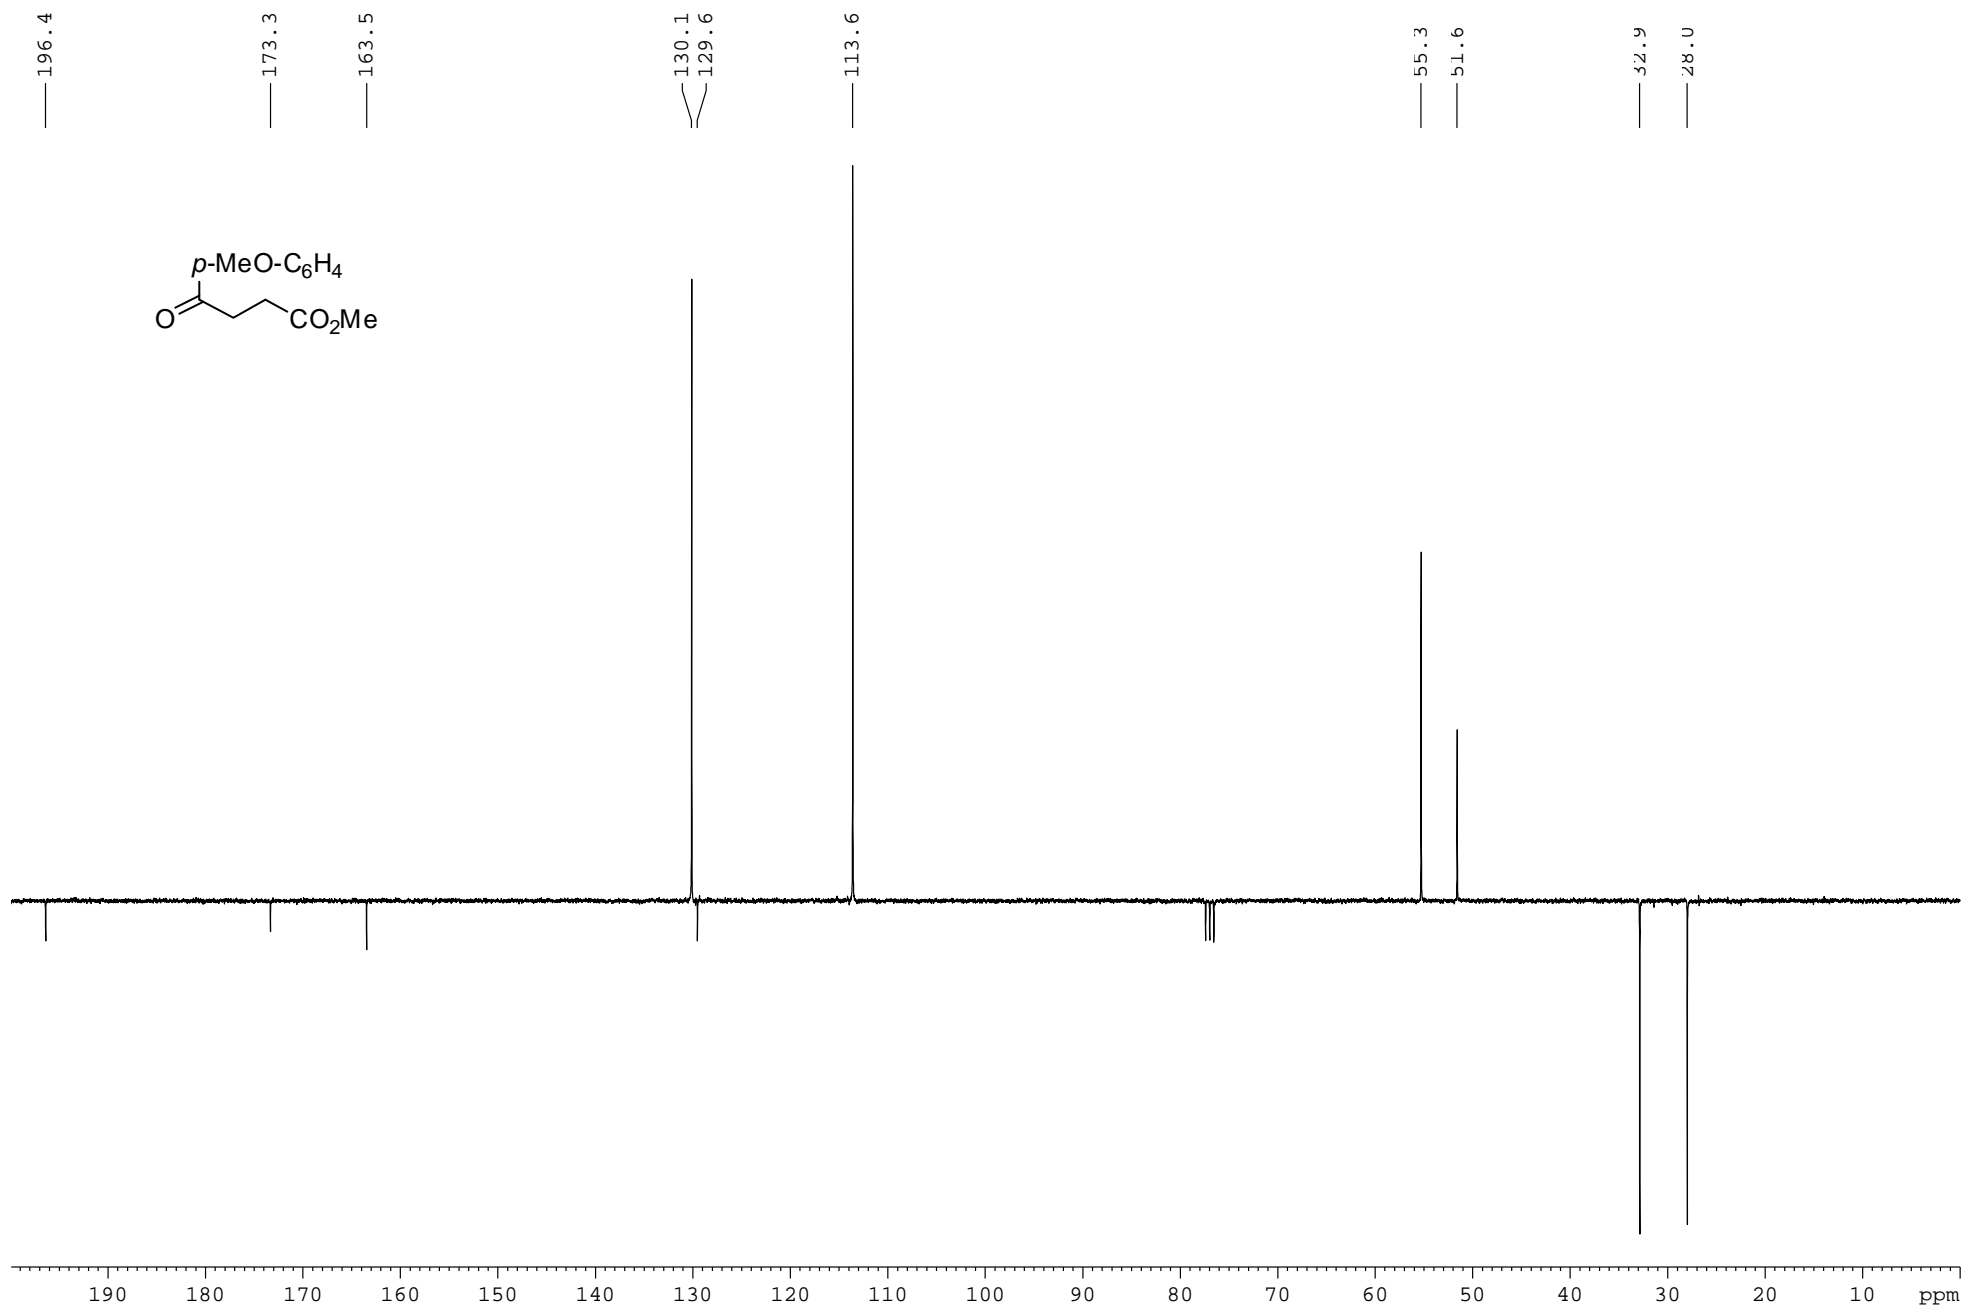

$^1\text{H}$  NMR ( $\text{CDCl}_3$ , 600 MHz) of **6e**

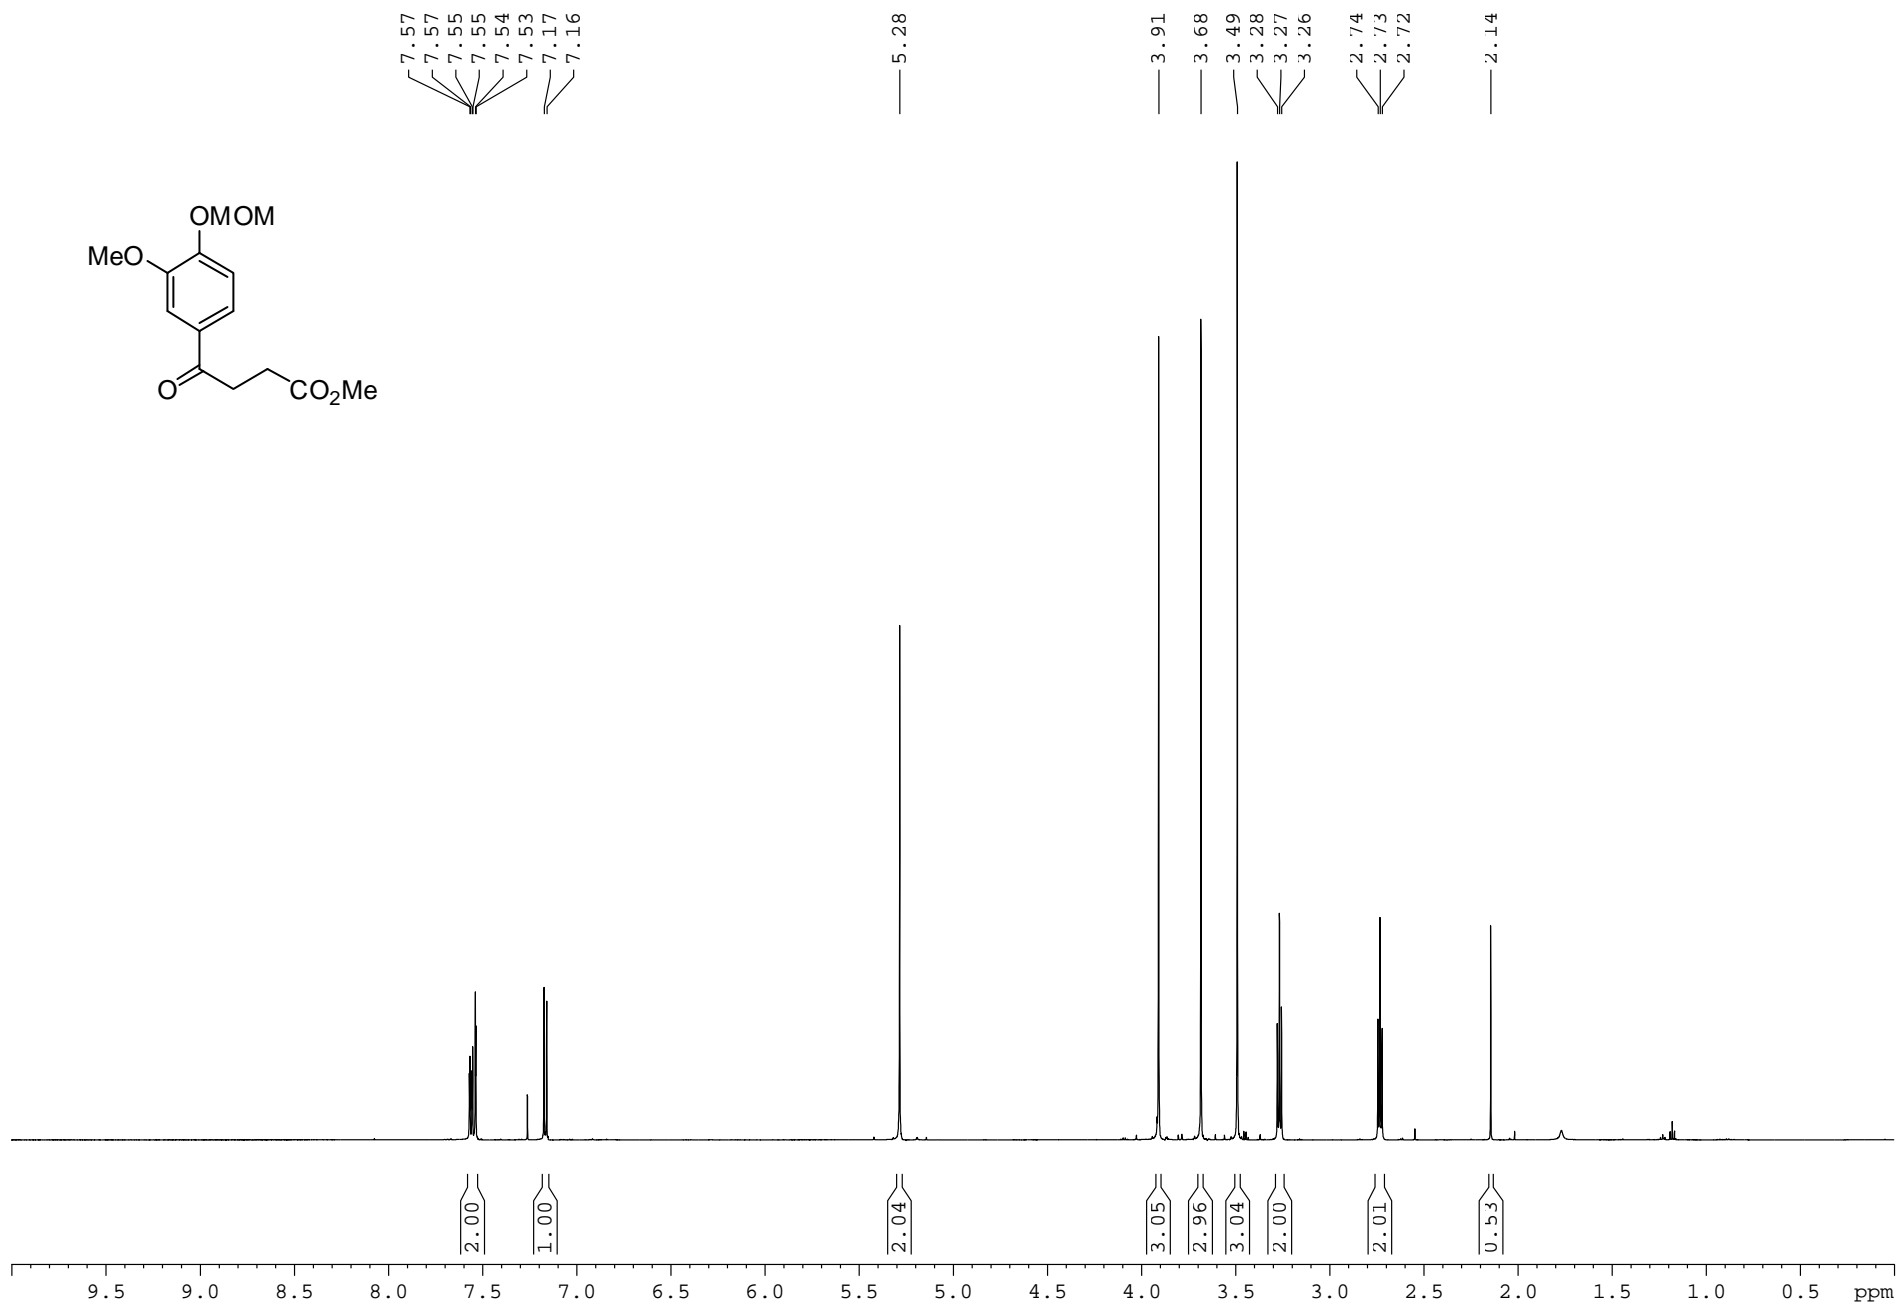

$^{13}\text{C}$  NMR ( $\text{CDCl}_3$ , 150 MHz) of **6e**

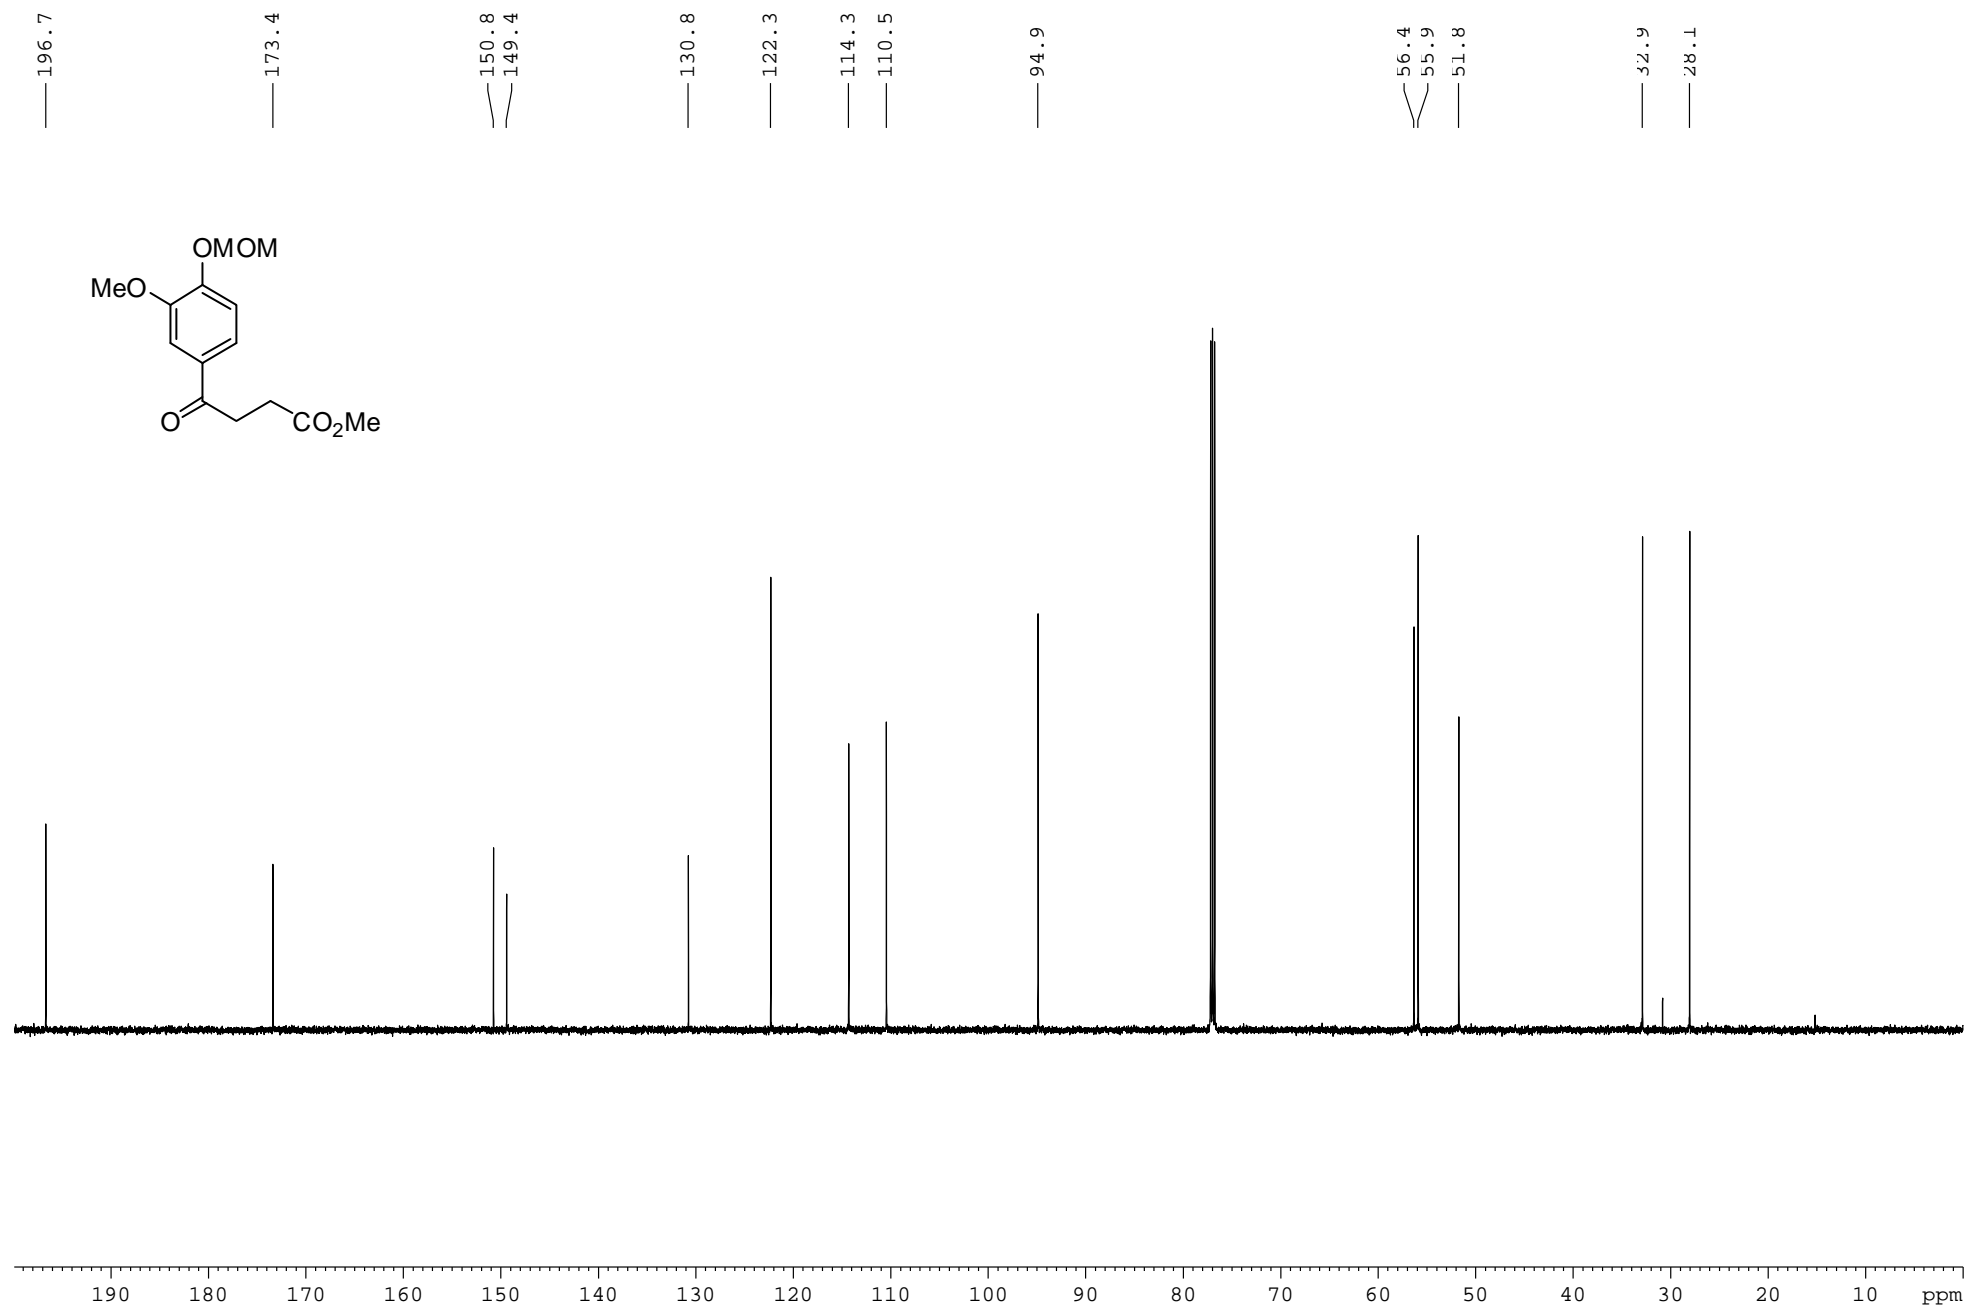

$^1\text{H}$  NMR ( $\text{CDCl}_3$ , 300 MHz) of **6f**

7.92  
7.91  
7.91  
7.89  
7.88  
7.88

6.89  
6.88  
6.88  
6.86  
6.85  
6.84

3.69

3.28  
3.26  
3.24

2.76  
2.74  
2.72

0.98

0.22

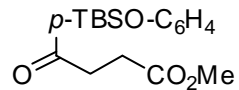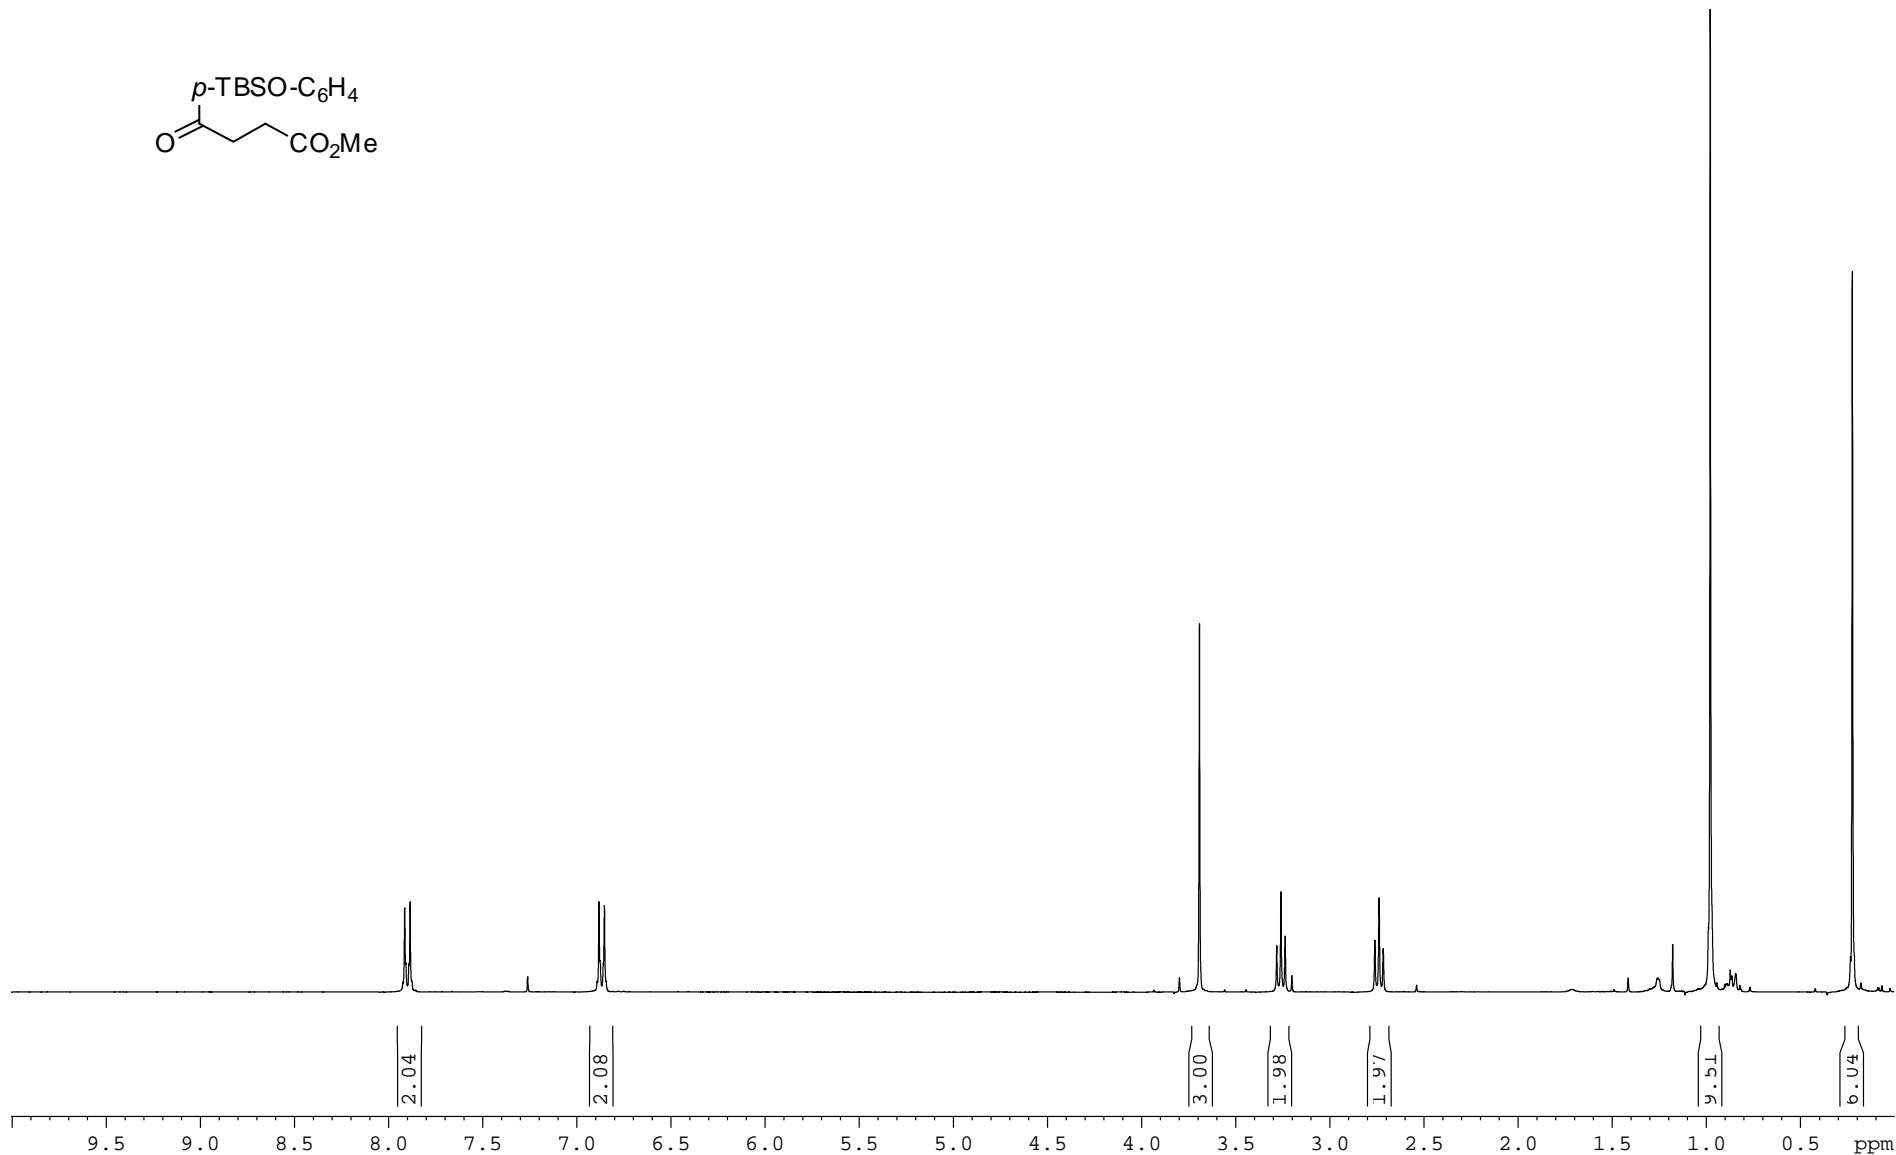



$^{13}\text{C}$  NMR-APT ( $\text{CDCl}_3$ , 75 MHz) of **6f**

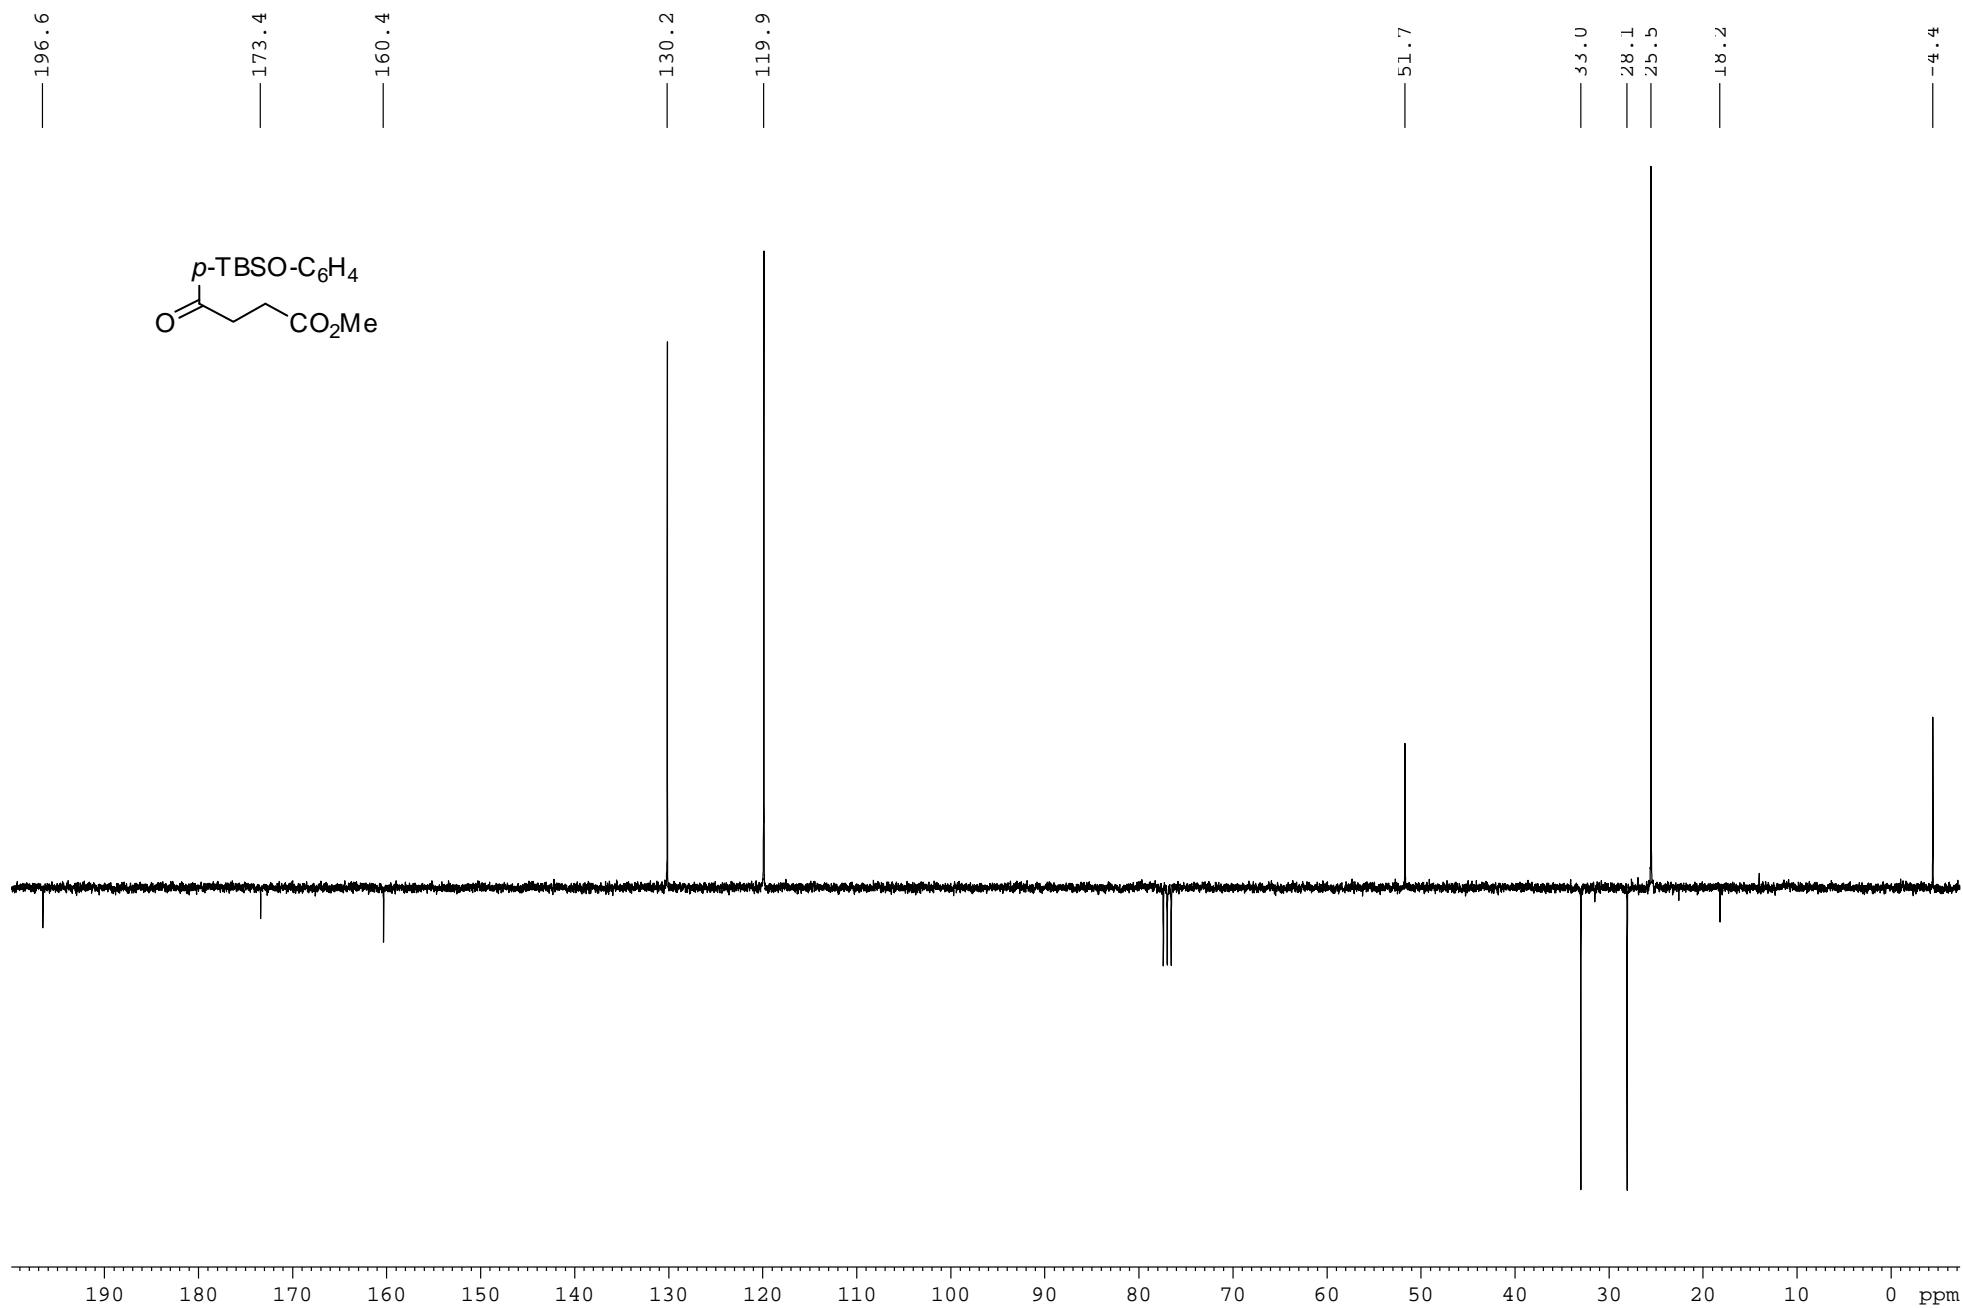

$^1\text{H}$  NMR ( $\text{CDCl}_3$ , 300 MHz) of **6g**

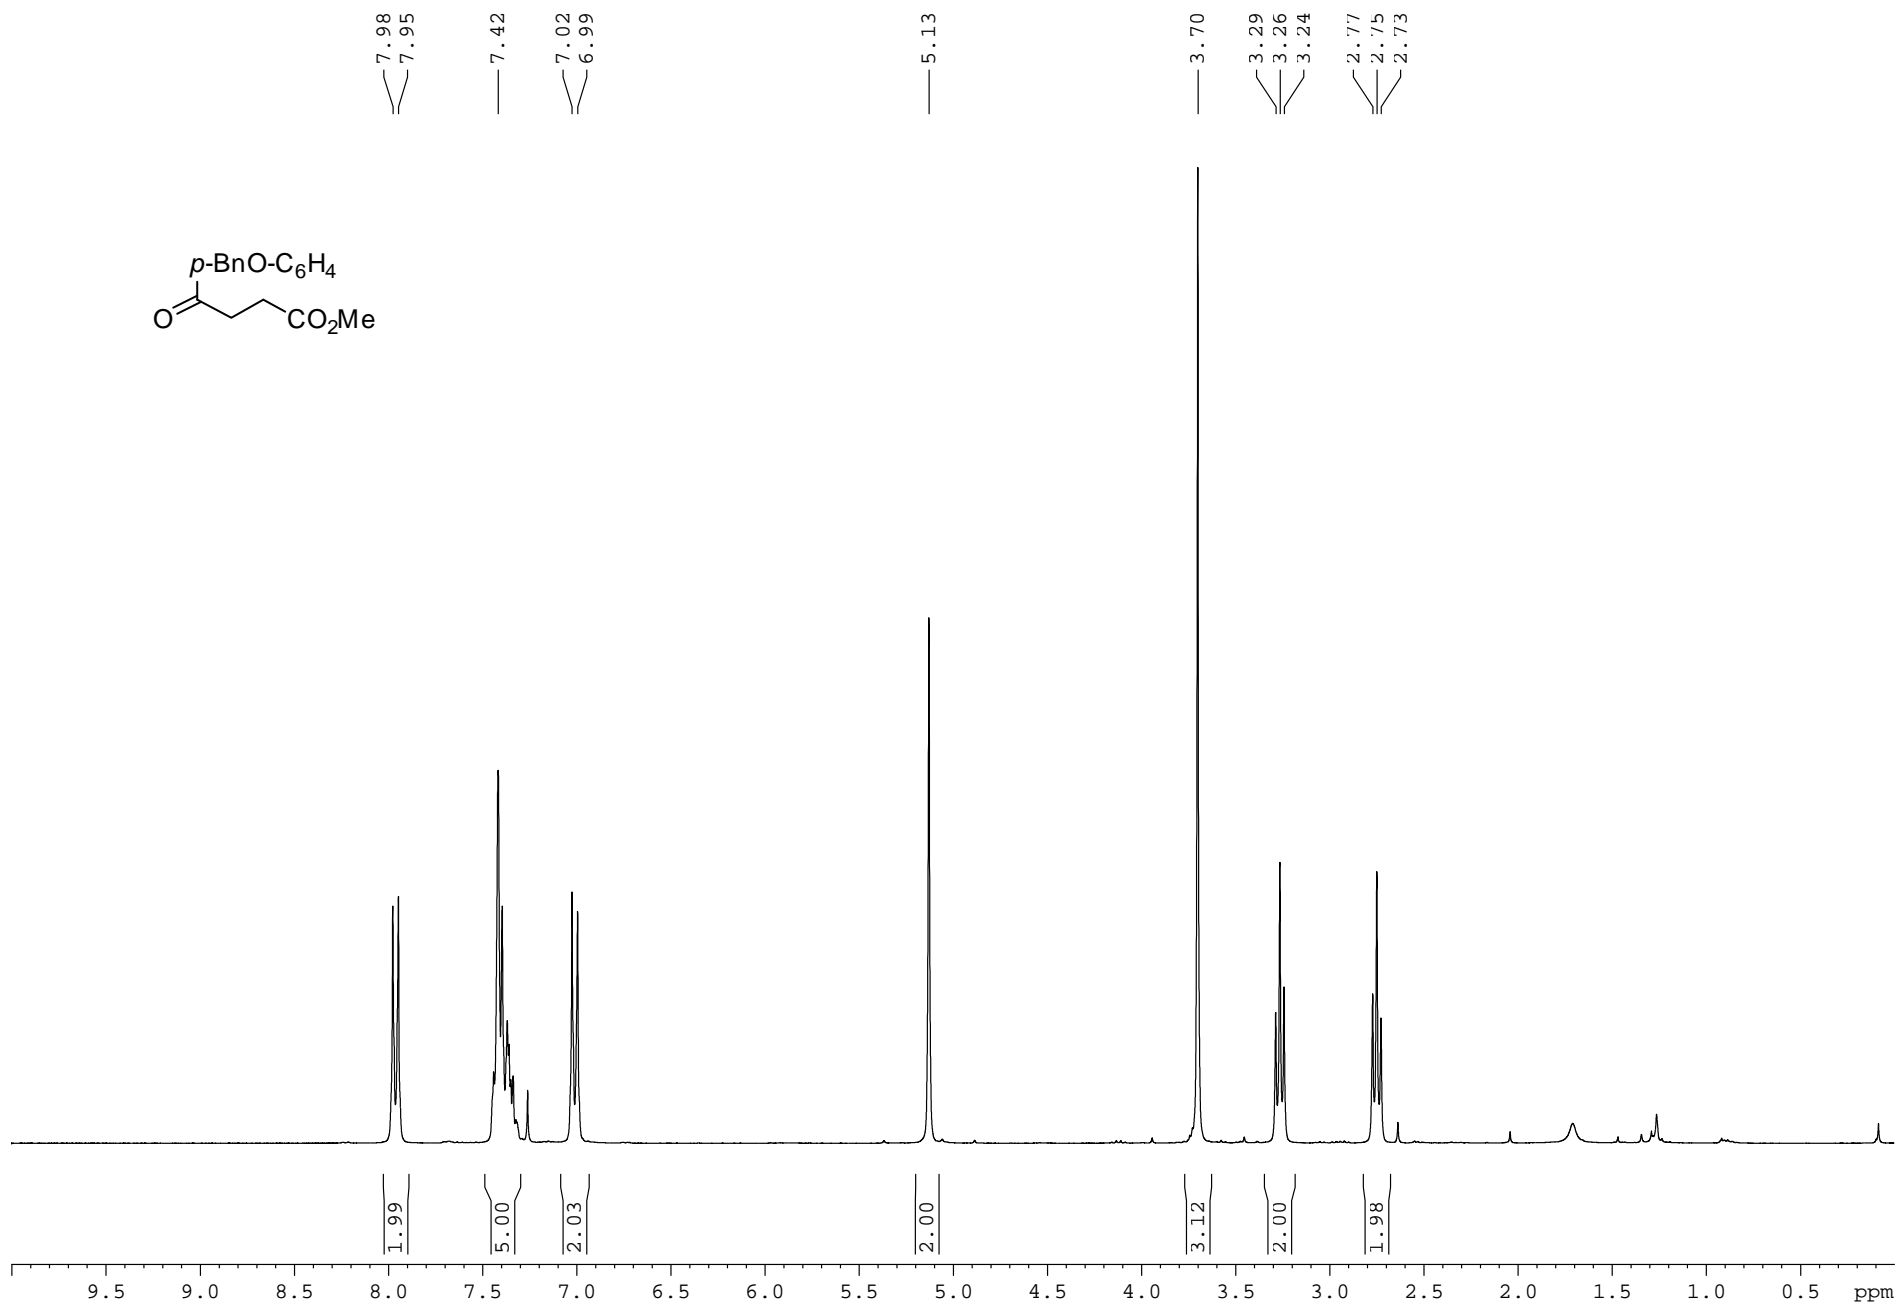

$^{13}\text{C}$  NMR-APT ( $\text{CDCl}_3$ , 75 MHz) of **6g**

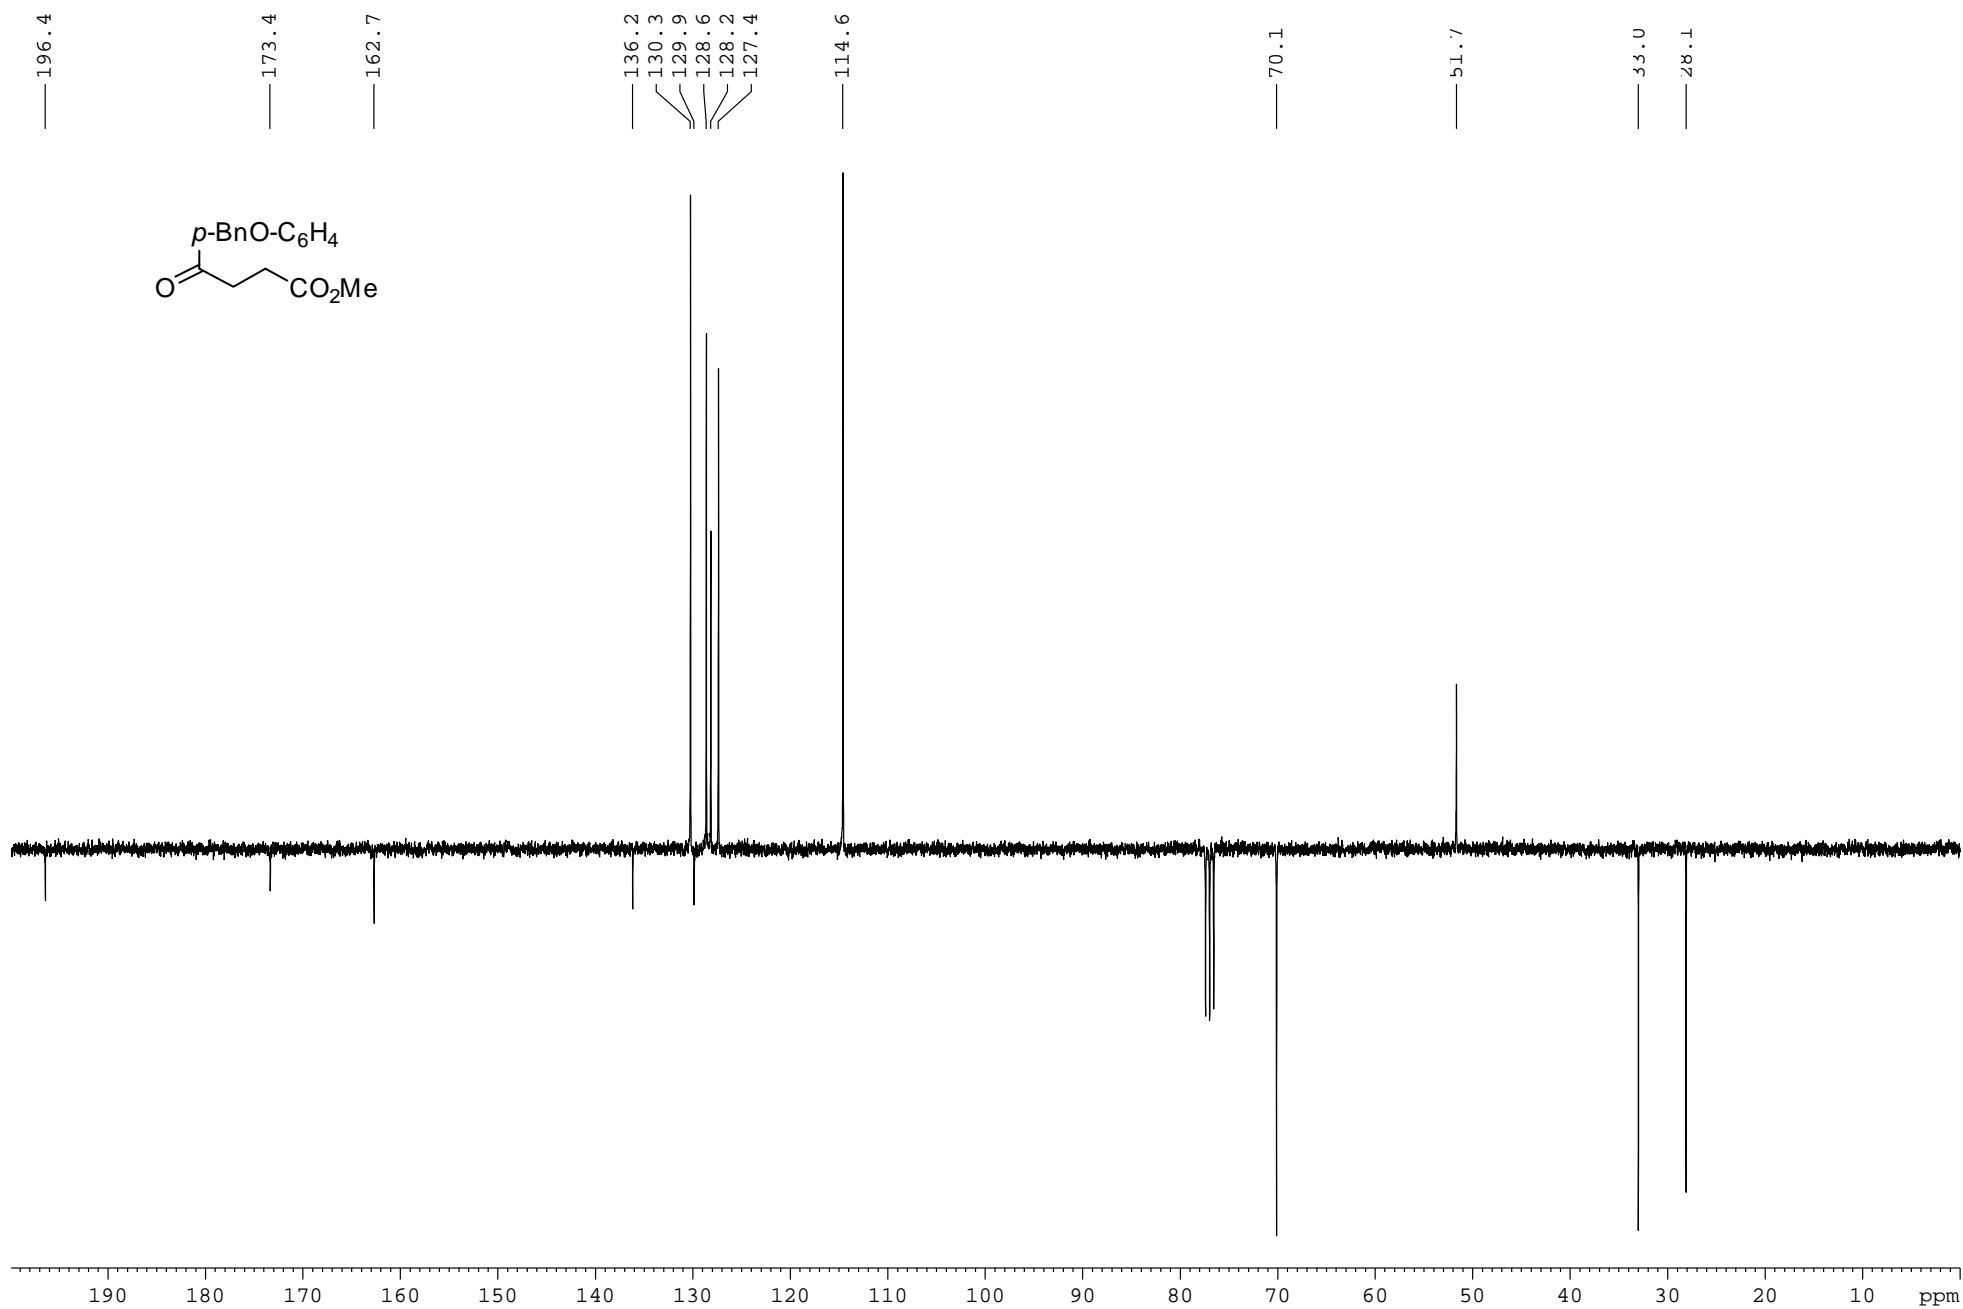

$^1\text{H}$  NMR ( $\text{CDCl}_3$ , 300 MHz) of **6h**

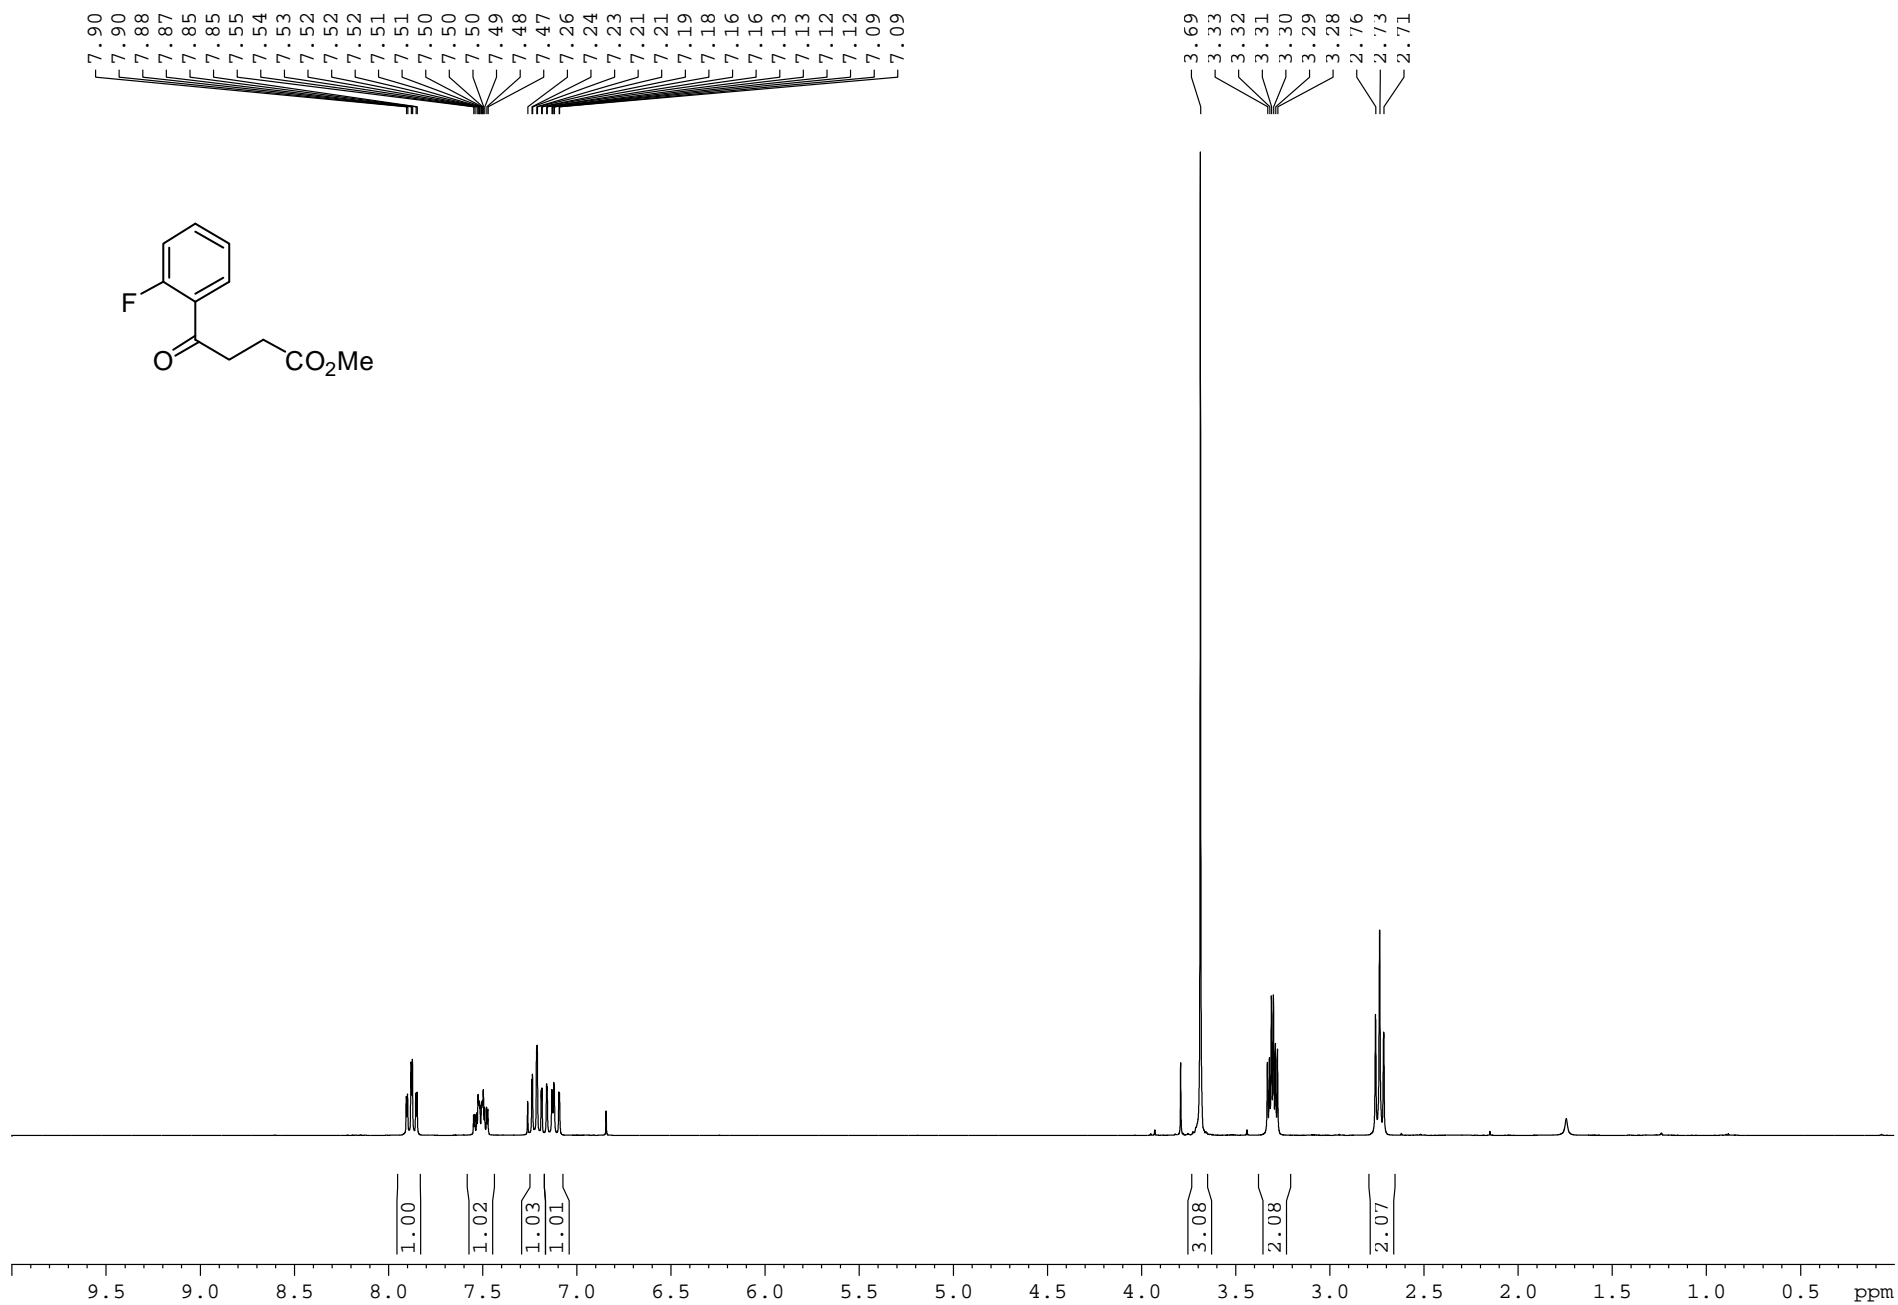

$^{13}\text{C}$  NMR-APT ( $\text{CDCl}_3$ , 75 MHz) of **6h**

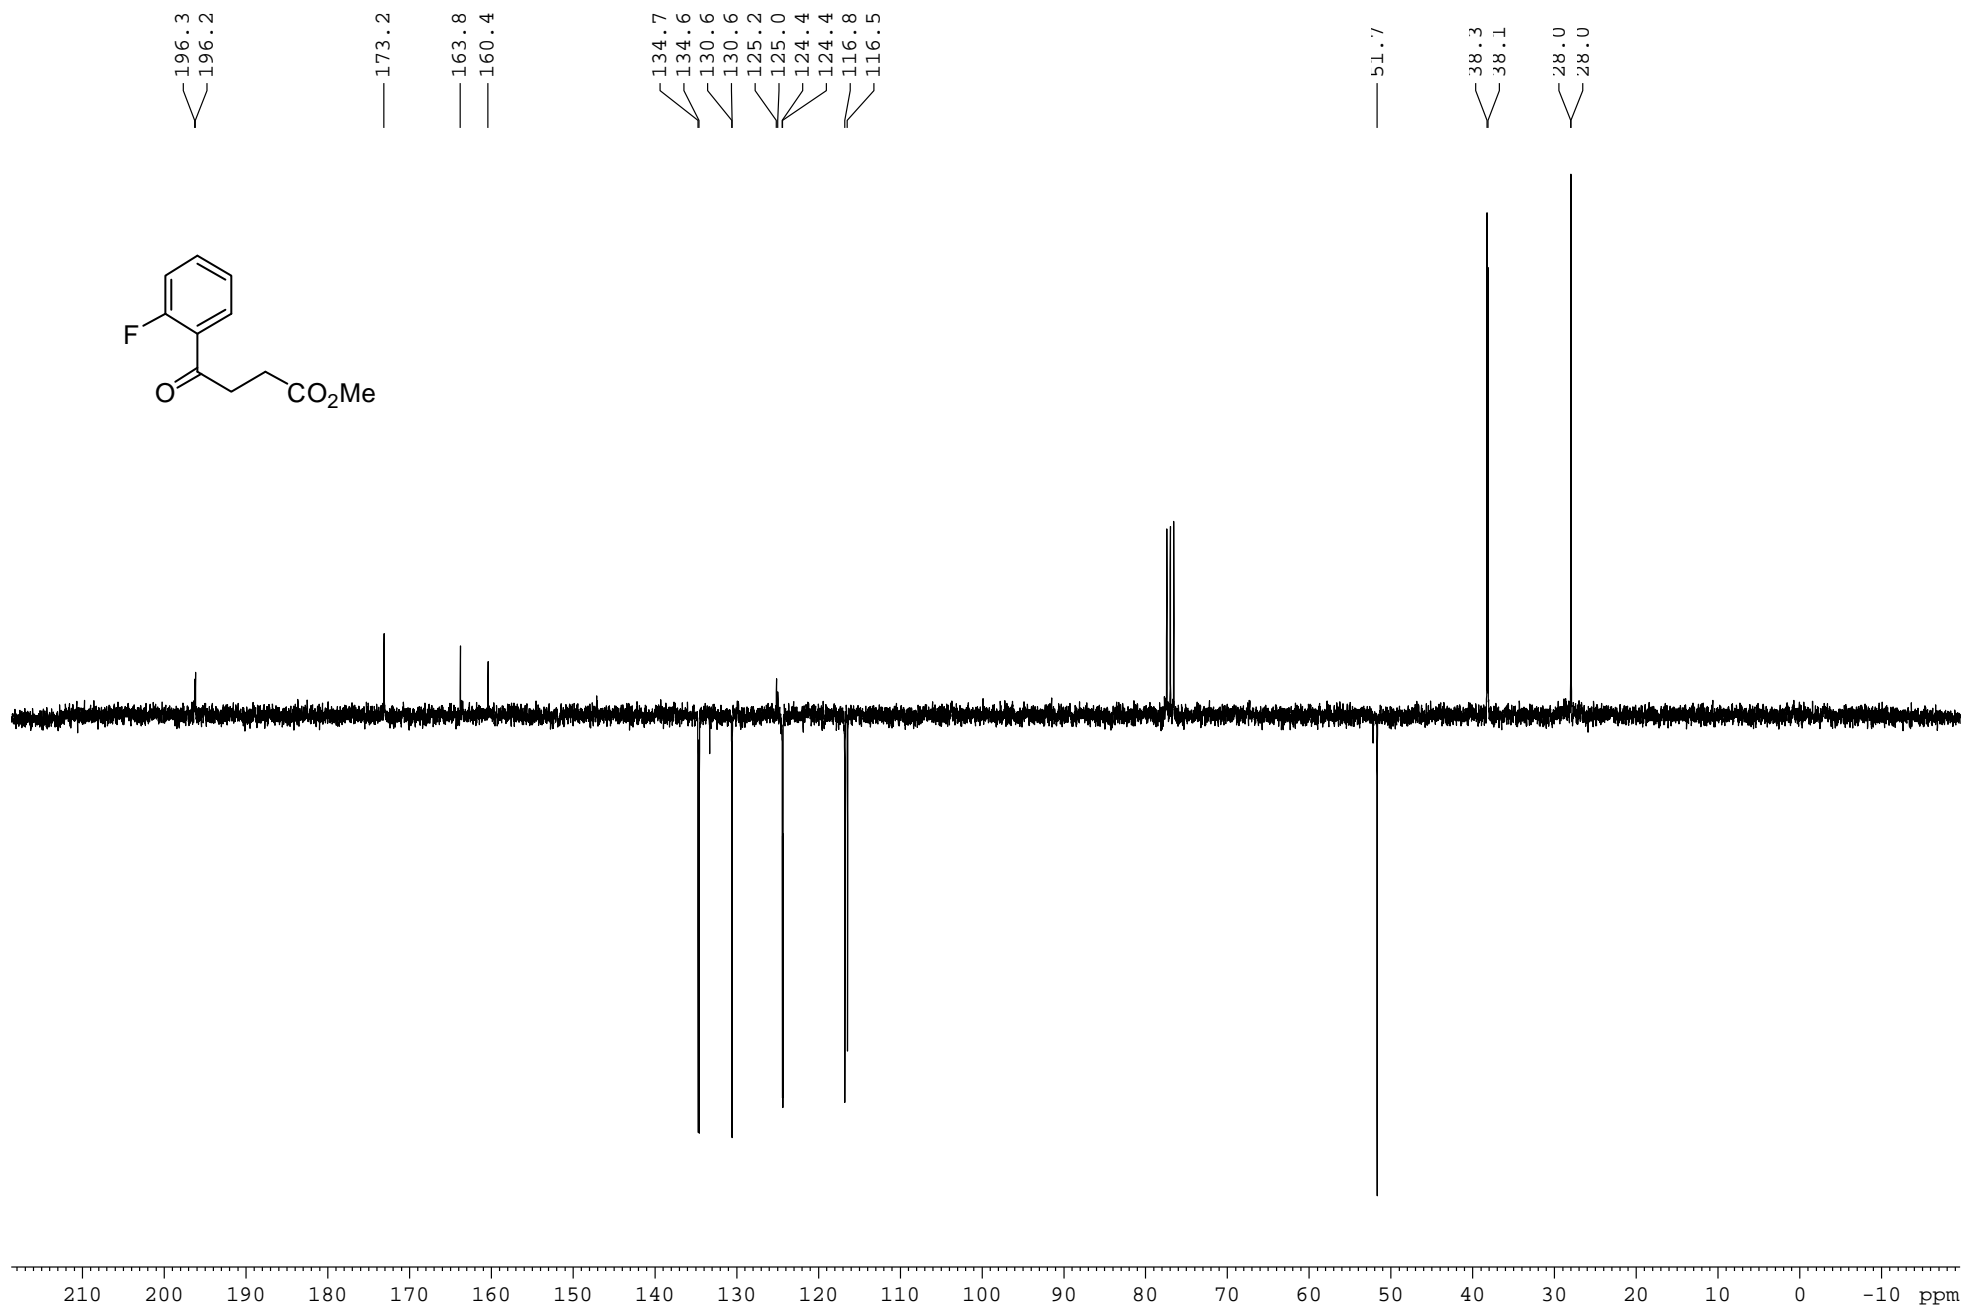

$^1\text{H}$  NMR ( $\text{CDCl}_3$ , 300 MHz) of **6i**

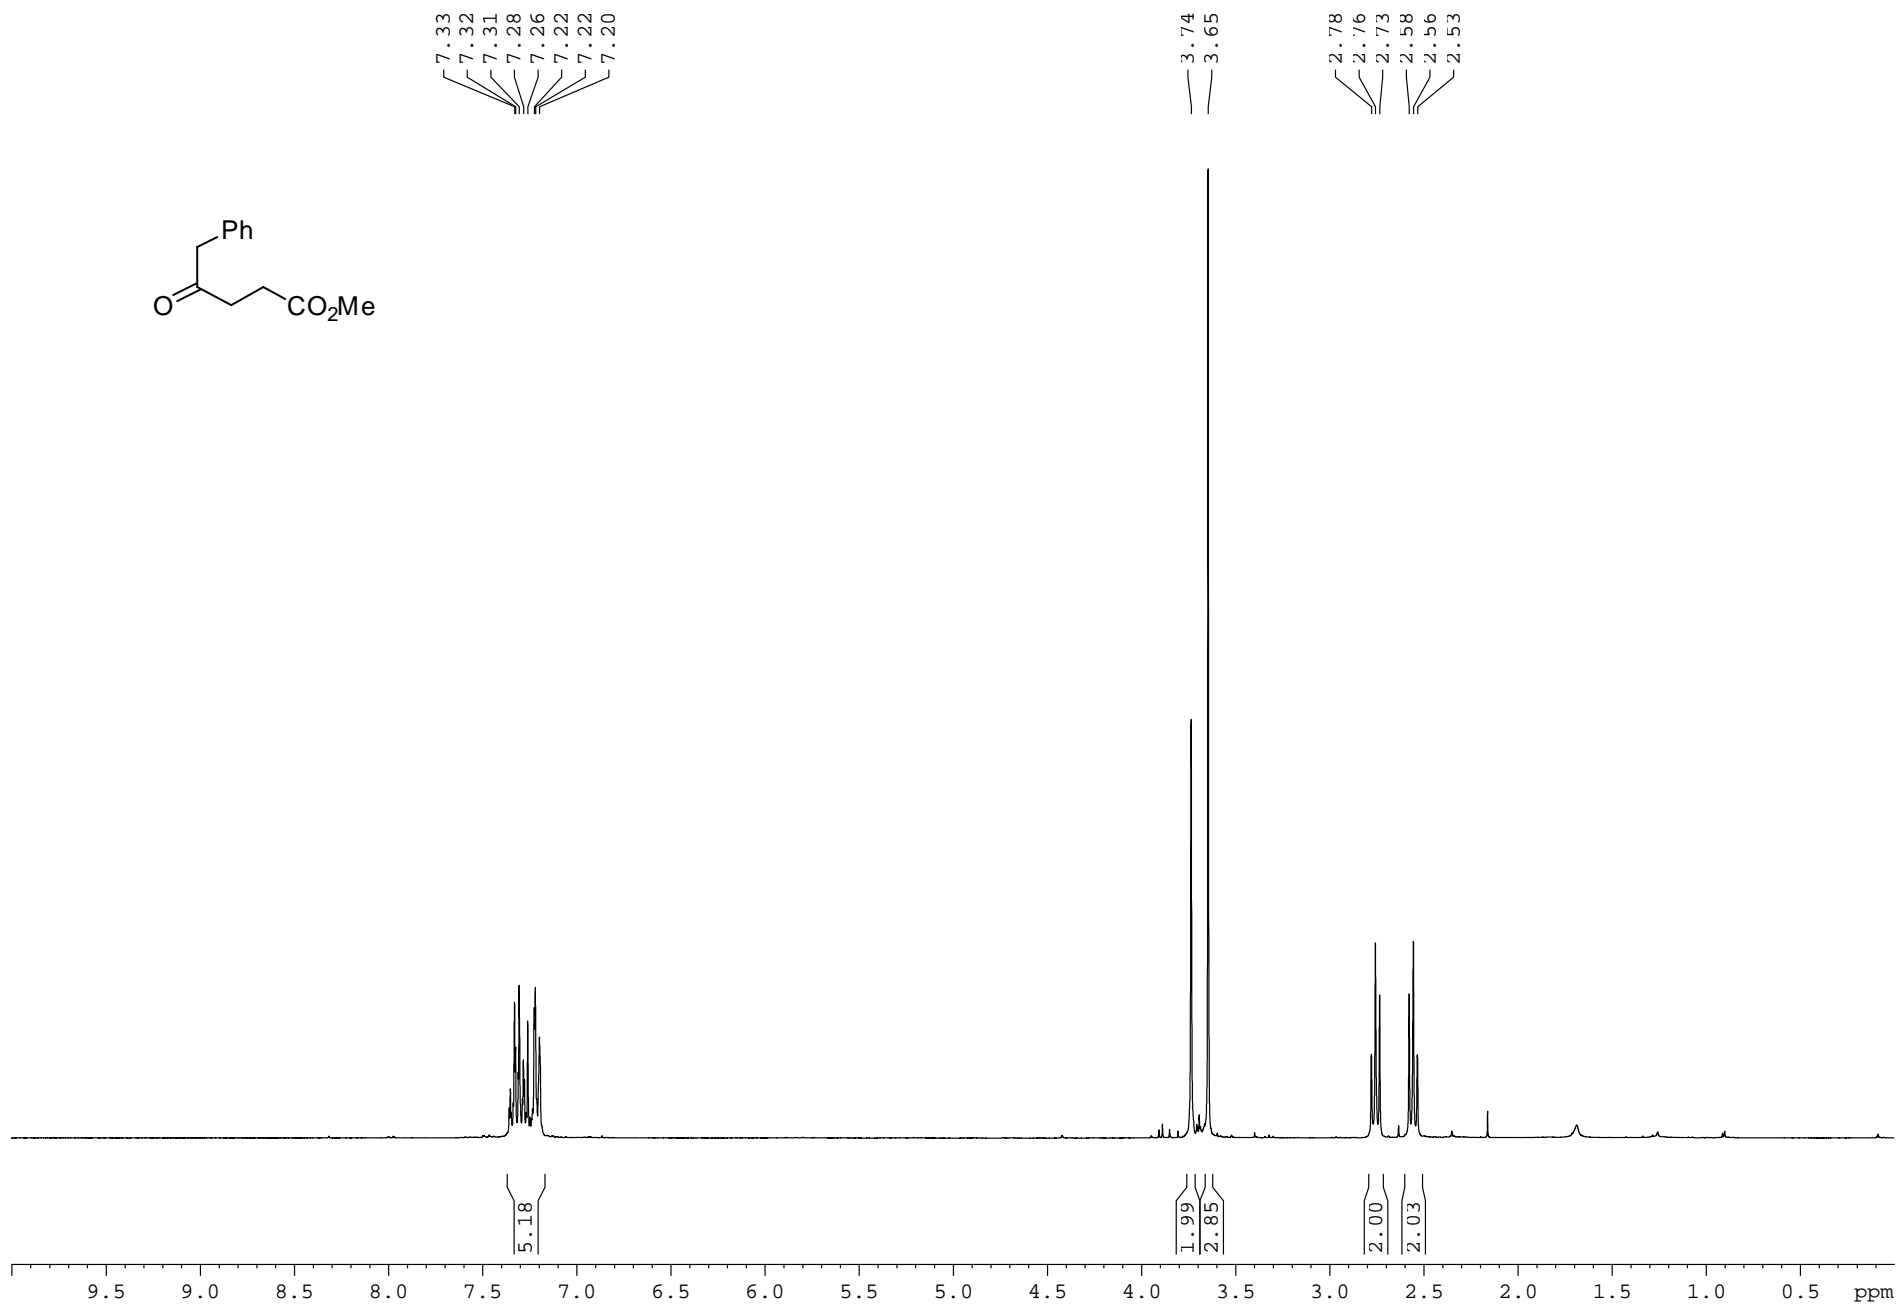

$^{13}\text{C}$  NMR-APT ( $\text{CDCl}_3$ , 75 MHz) of **6i**

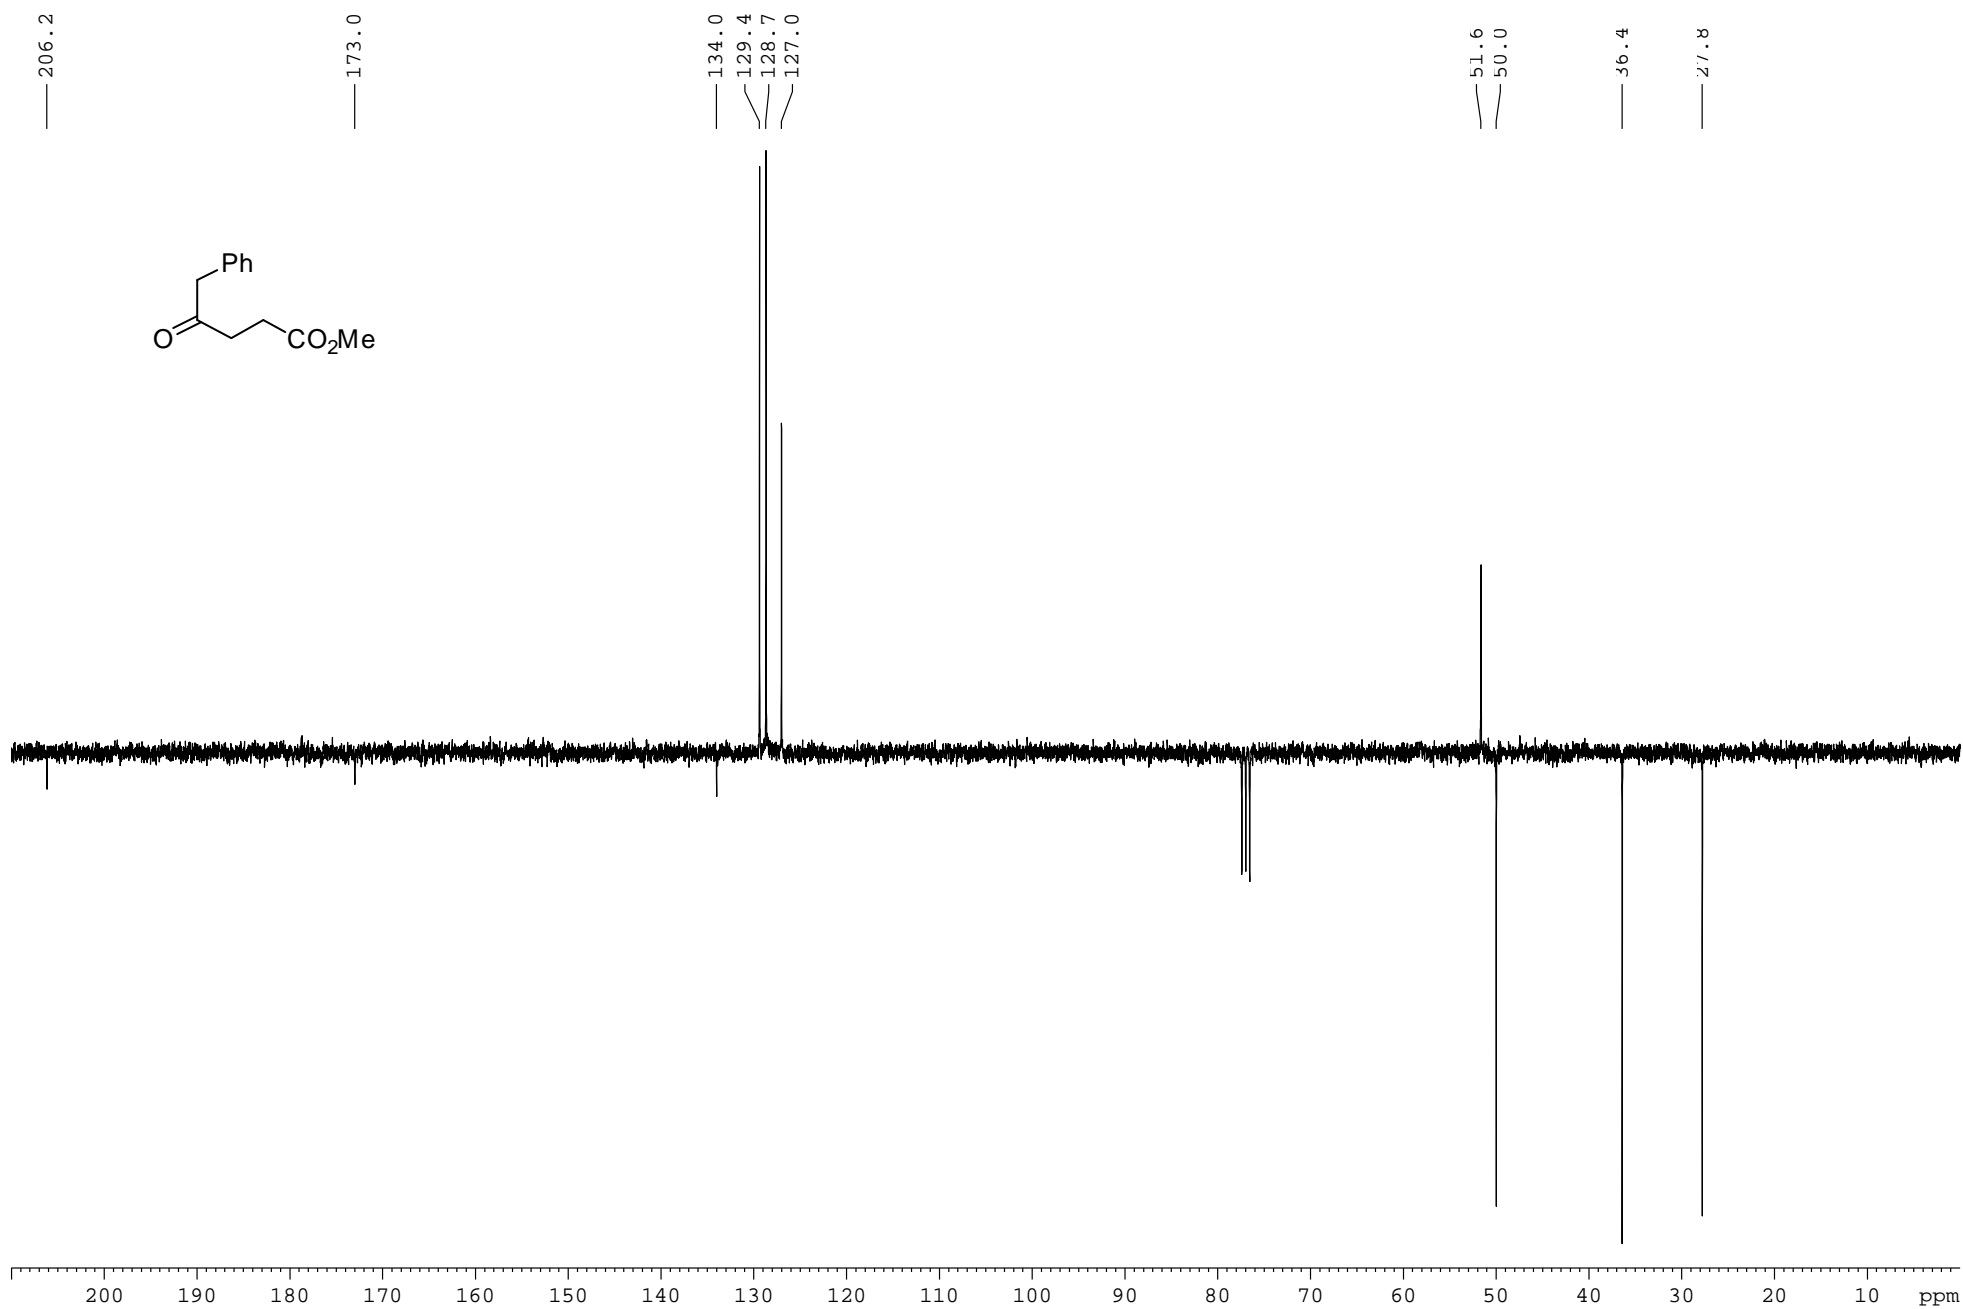

$^1\text{H}$  NMR ( $\text{CDCl}_3$ , 300 MHz) of **6j**

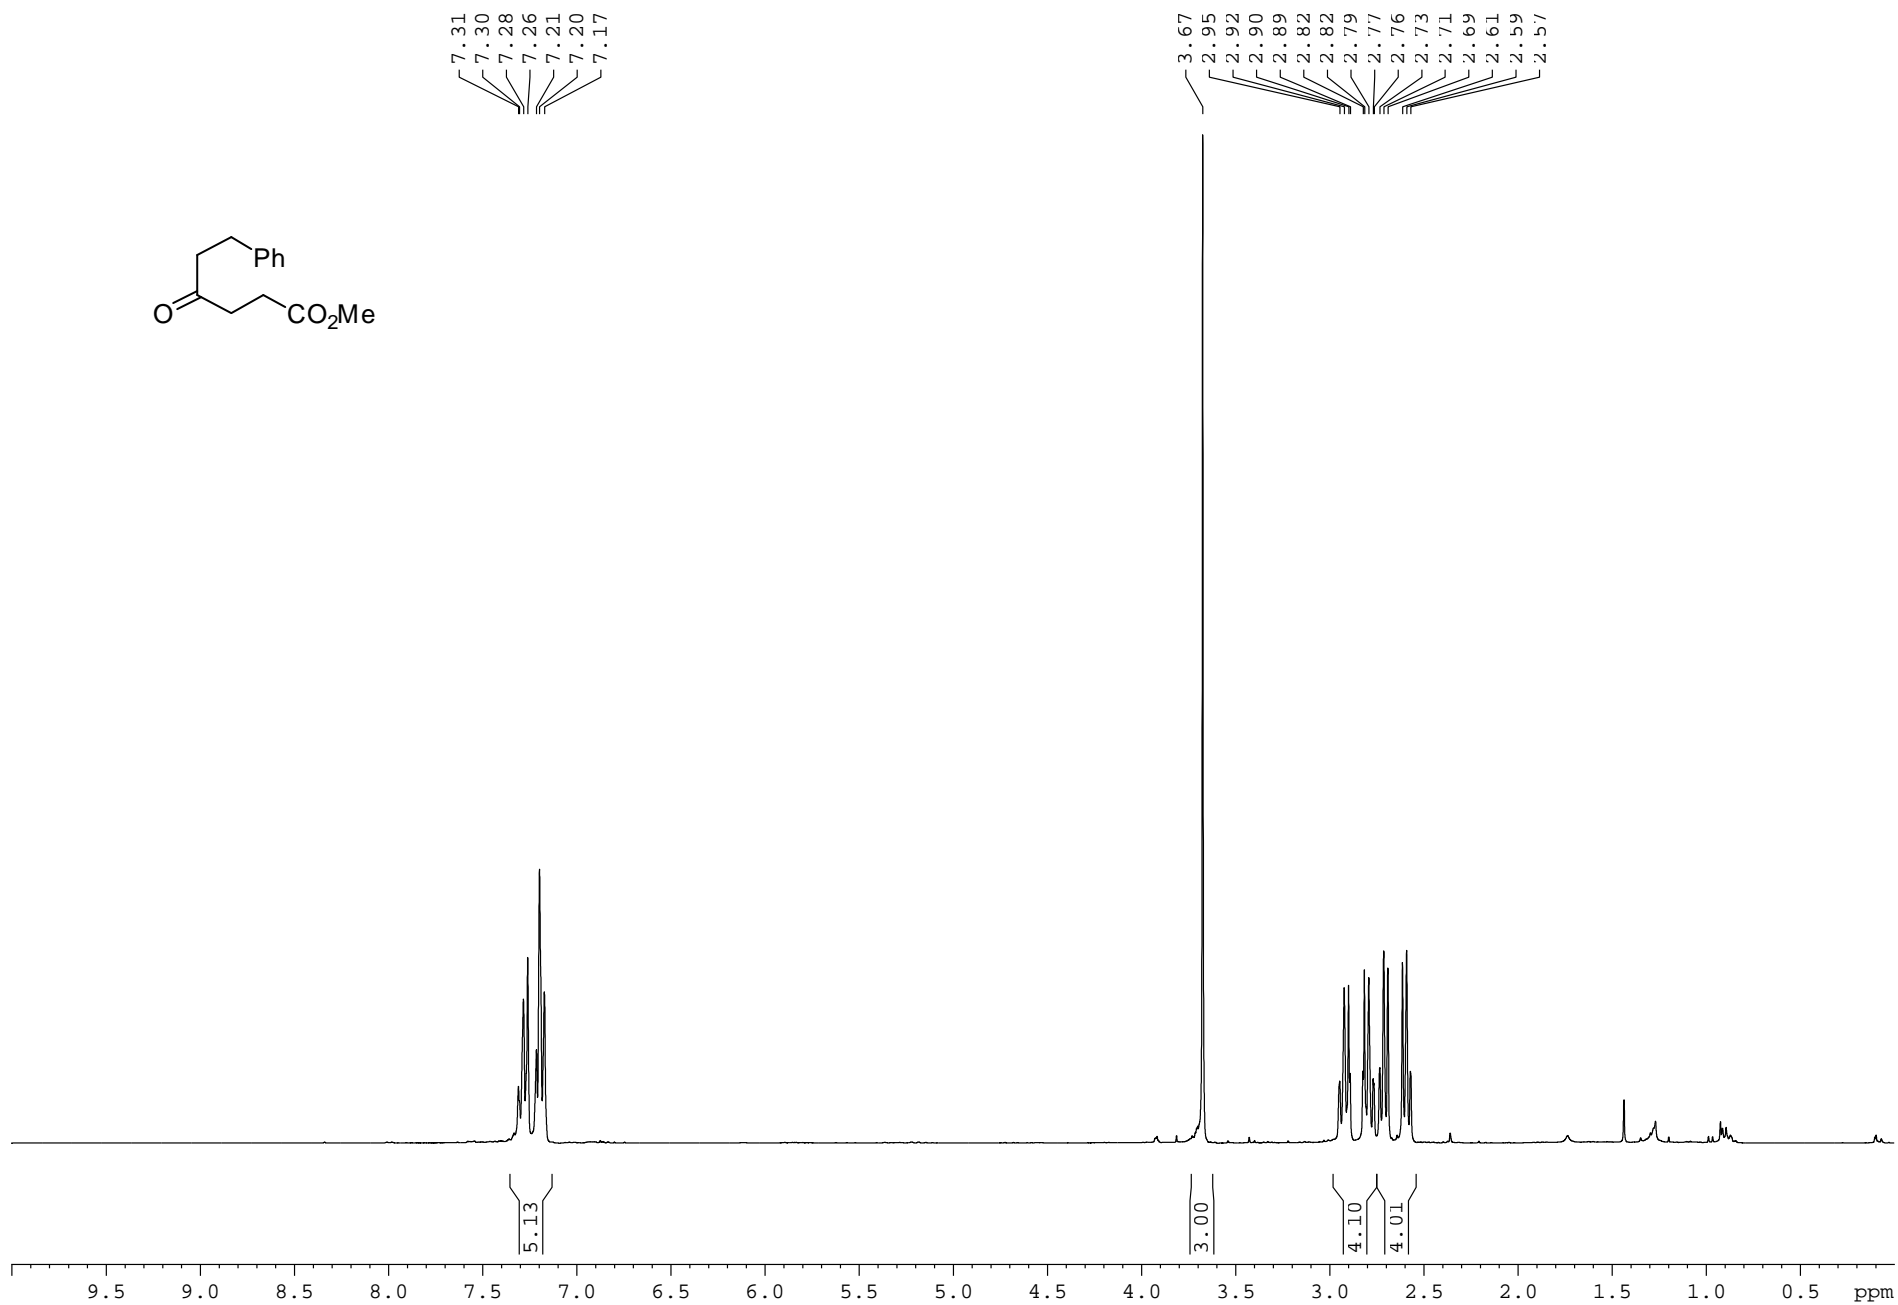



$^{13}\text{C}$  NMR-APT ( $\text{CDCl}_3$ , 75 MHz) of **6j**

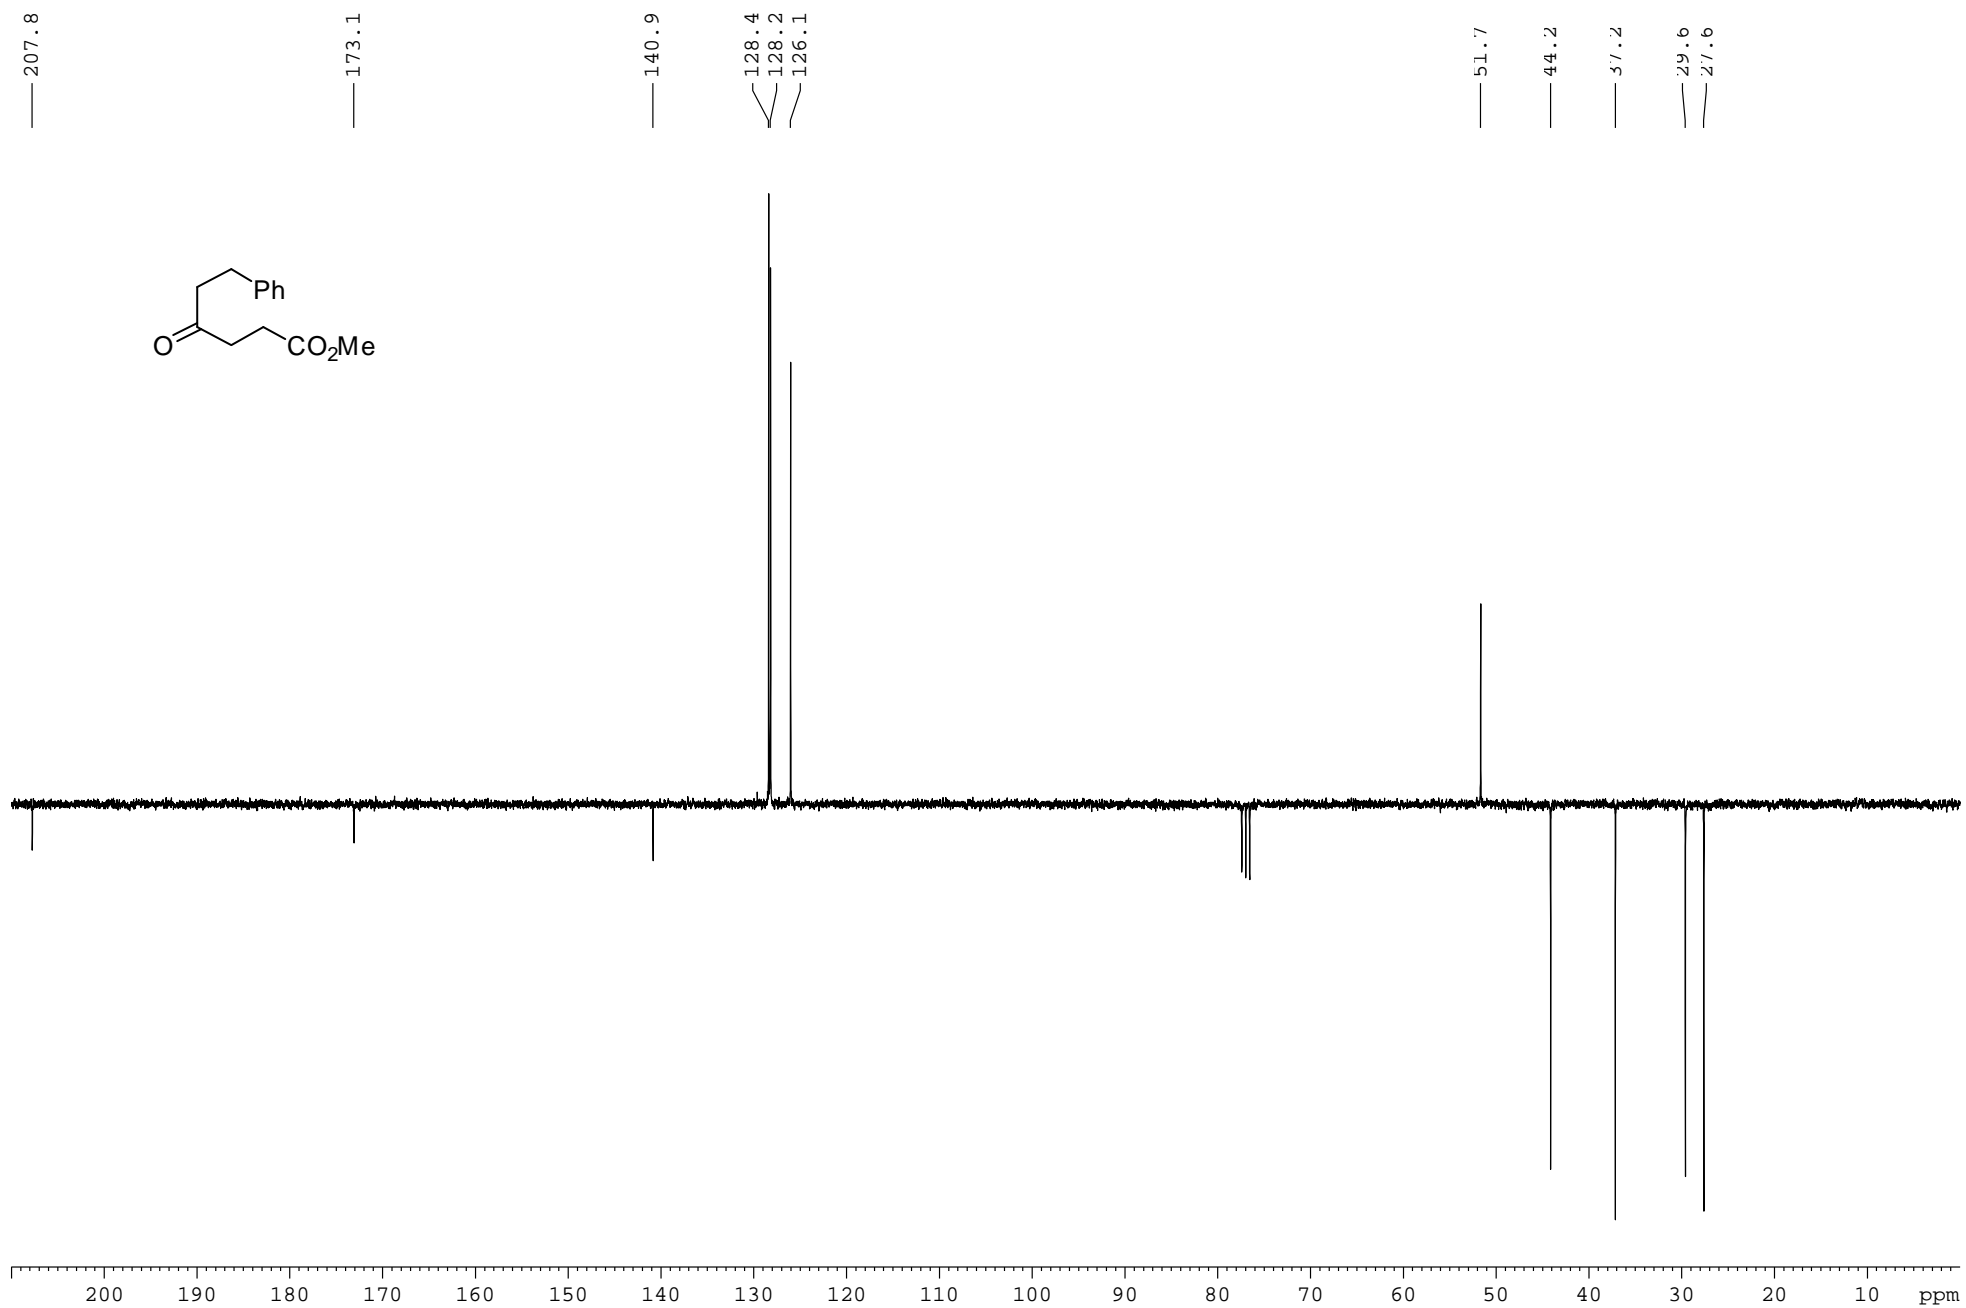

$^1\text{H}$  NMR ( $\text{CDCl}_3$ , 300 MHz) of **6k**

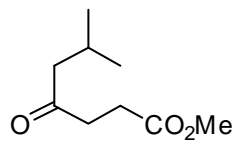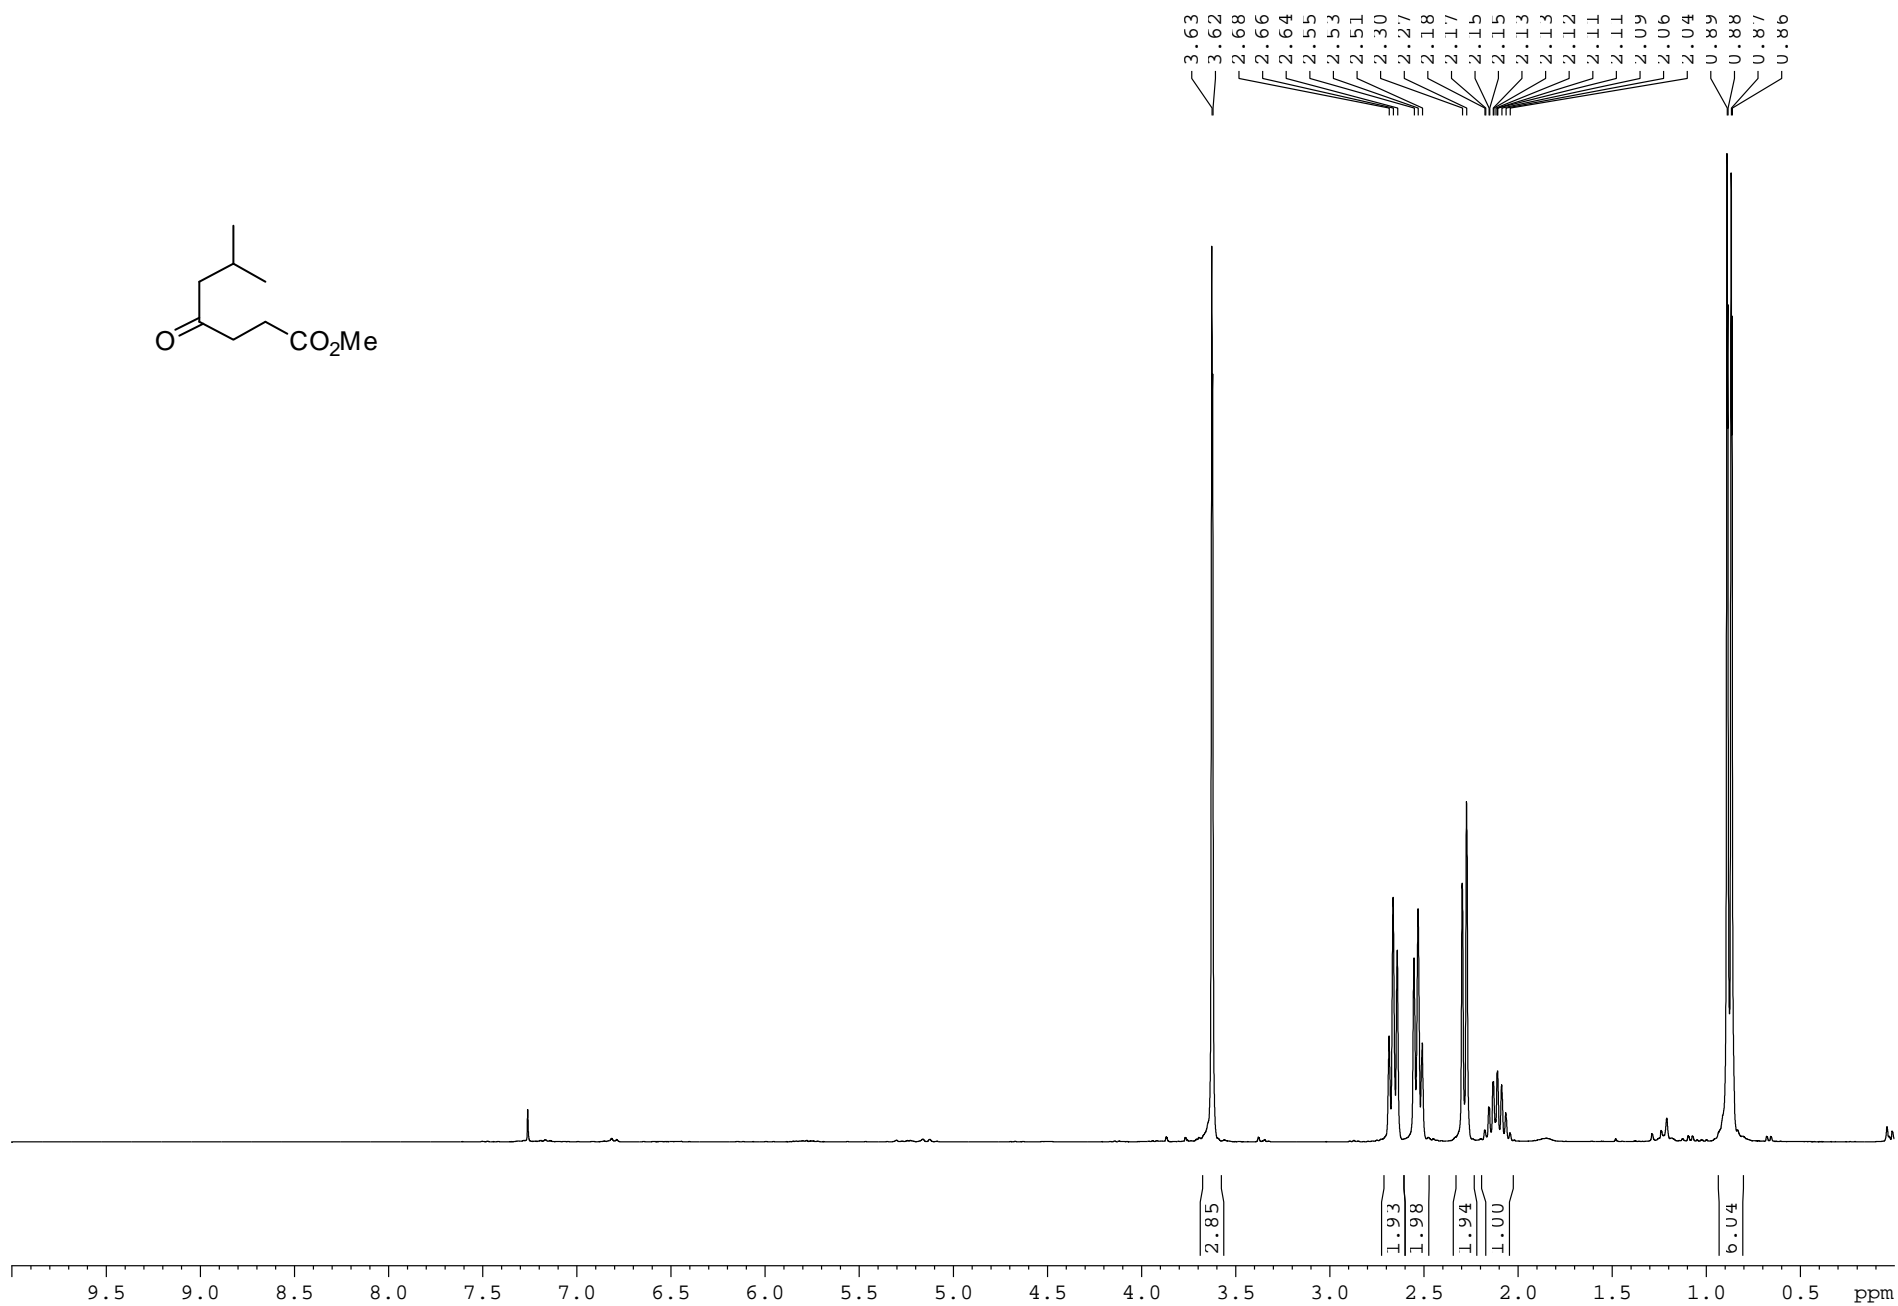

$^{13}\text{C}$  NMR-APT ( $\text{CDCl}_3$ , 75 MHz) of **6k**

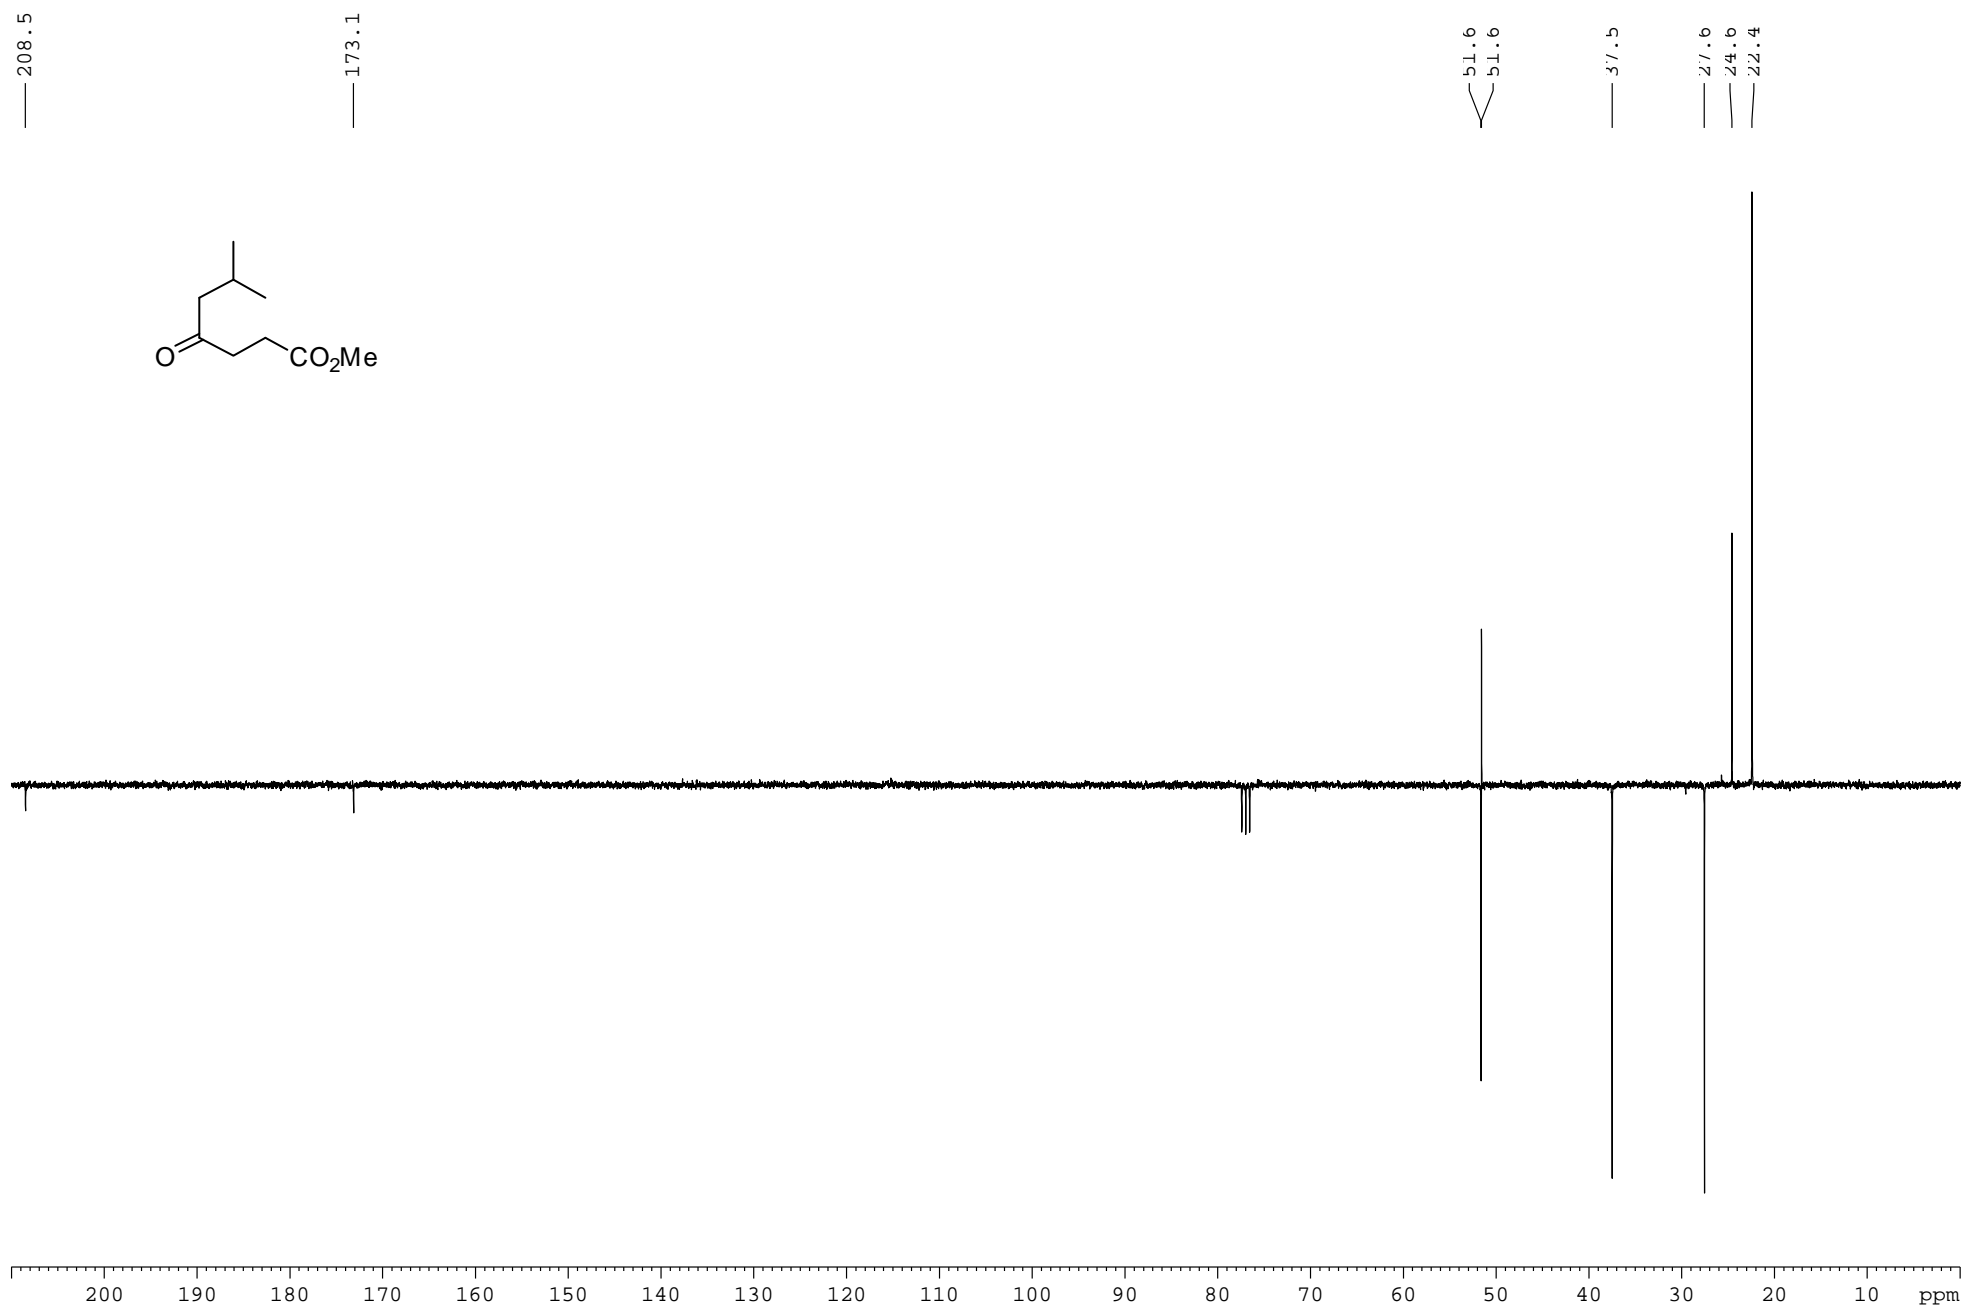

$^1\text{H}$  NMR ( $\text{CDCl}_3$ , 300 MHz) of **61**

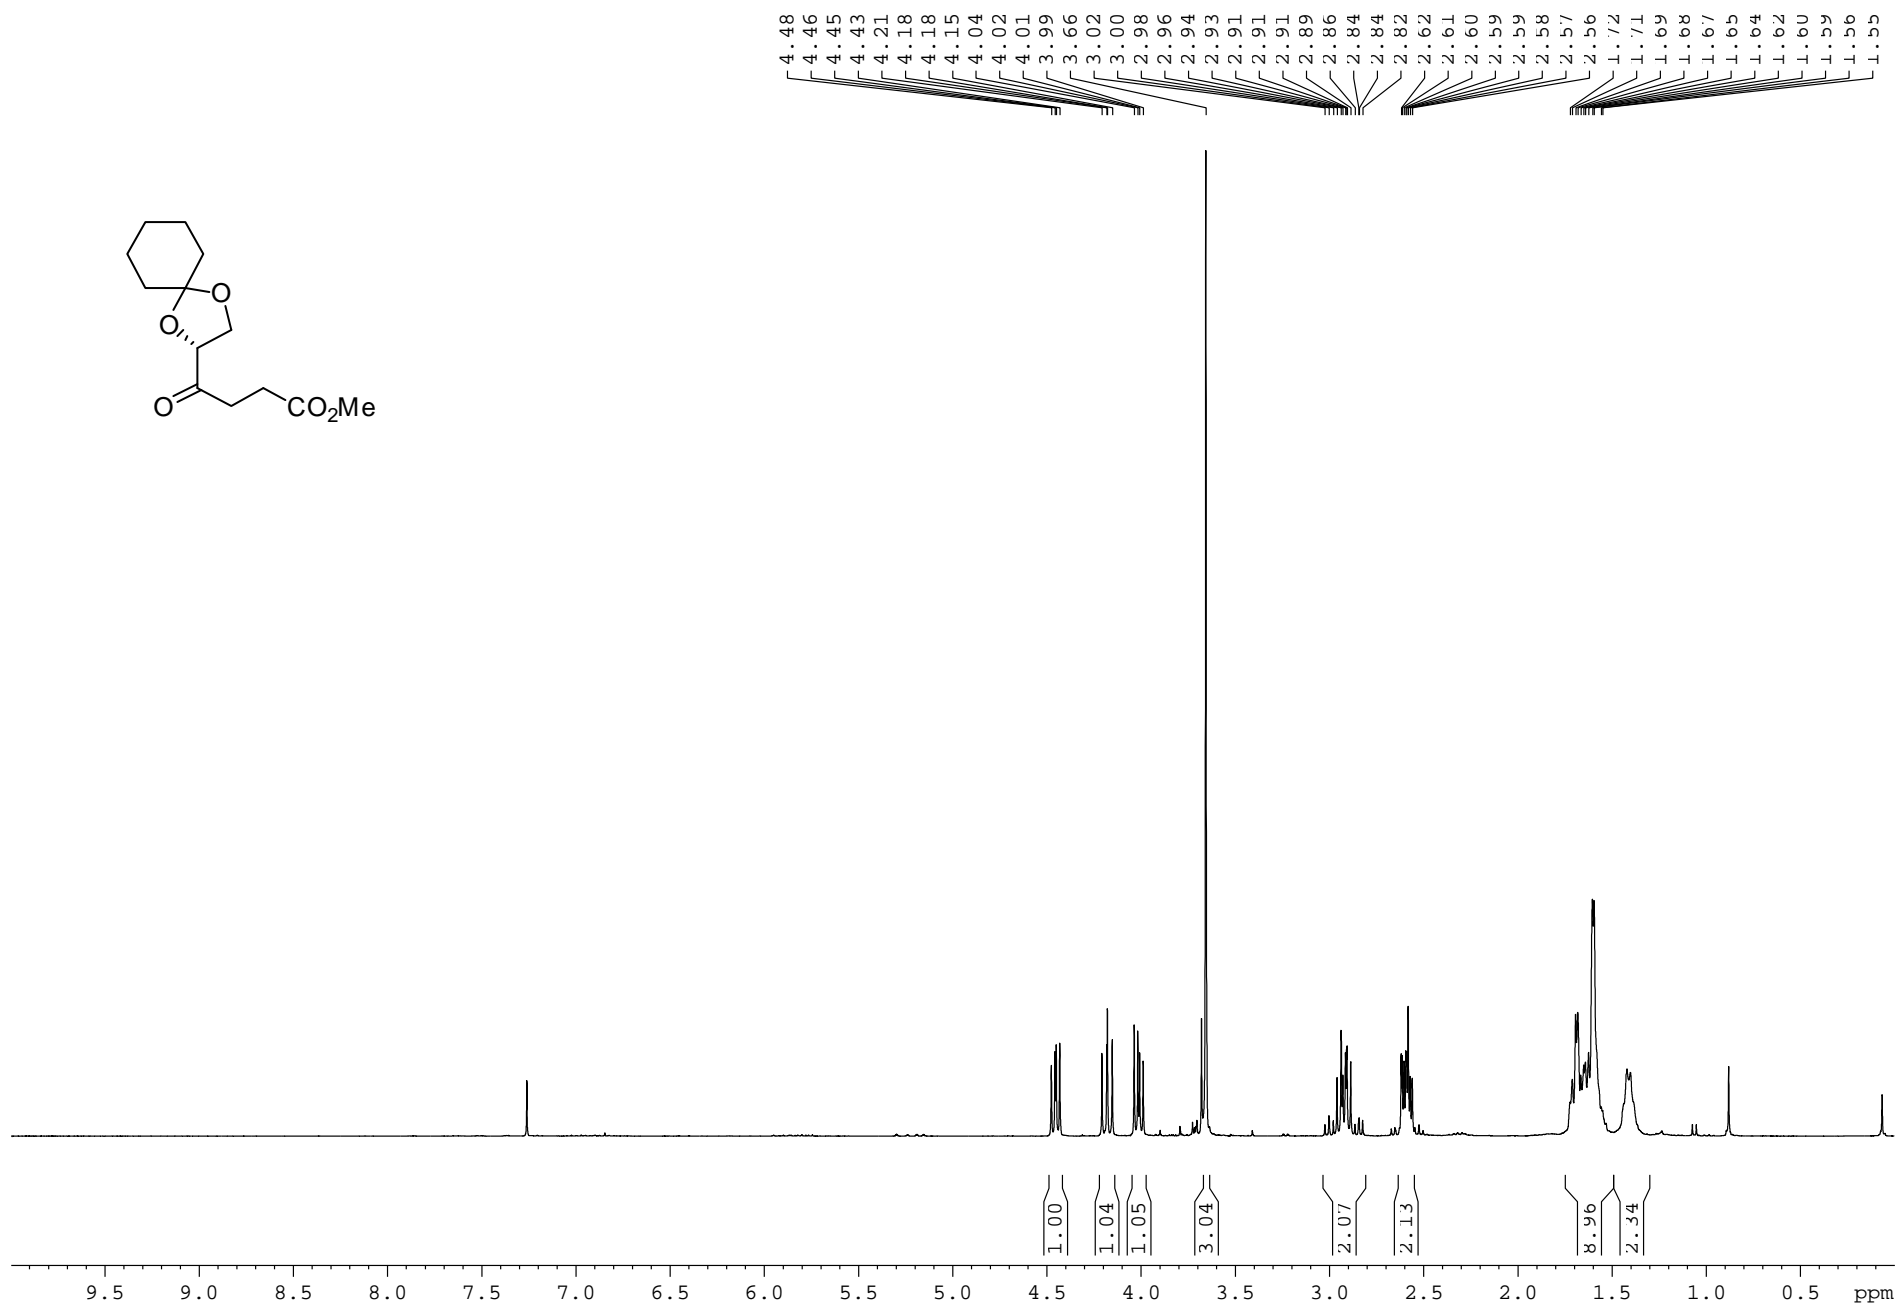

$^{13}\text{C}$  NMR-APT ( $\text{CDCl}_3$ , 75 MHz) of **61**

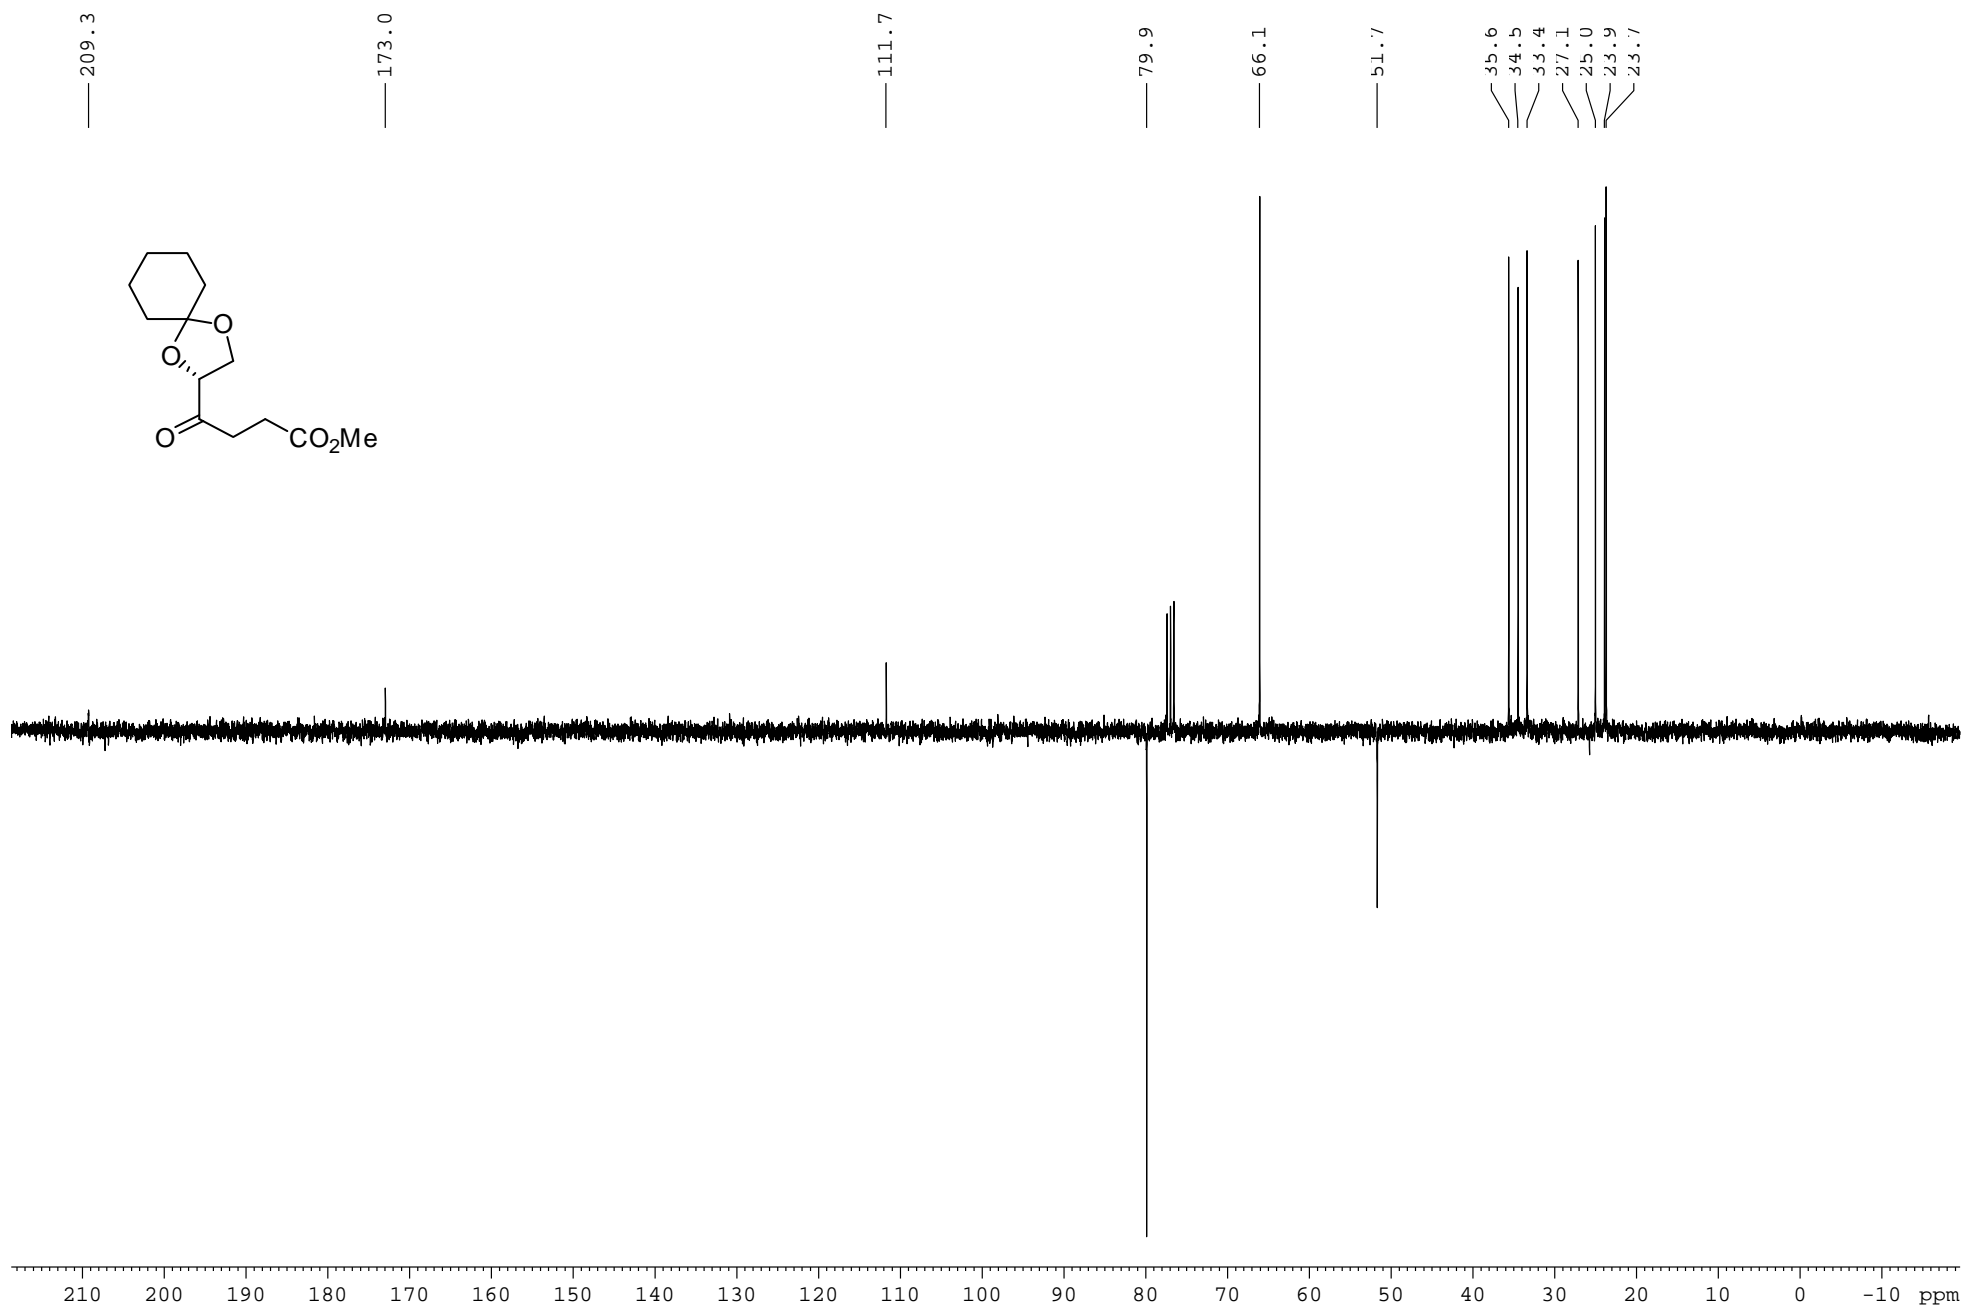

$^1\text{H}$  NMR ( $\text{CDCl}_3$ , 300 MHz) of **6m**

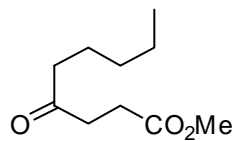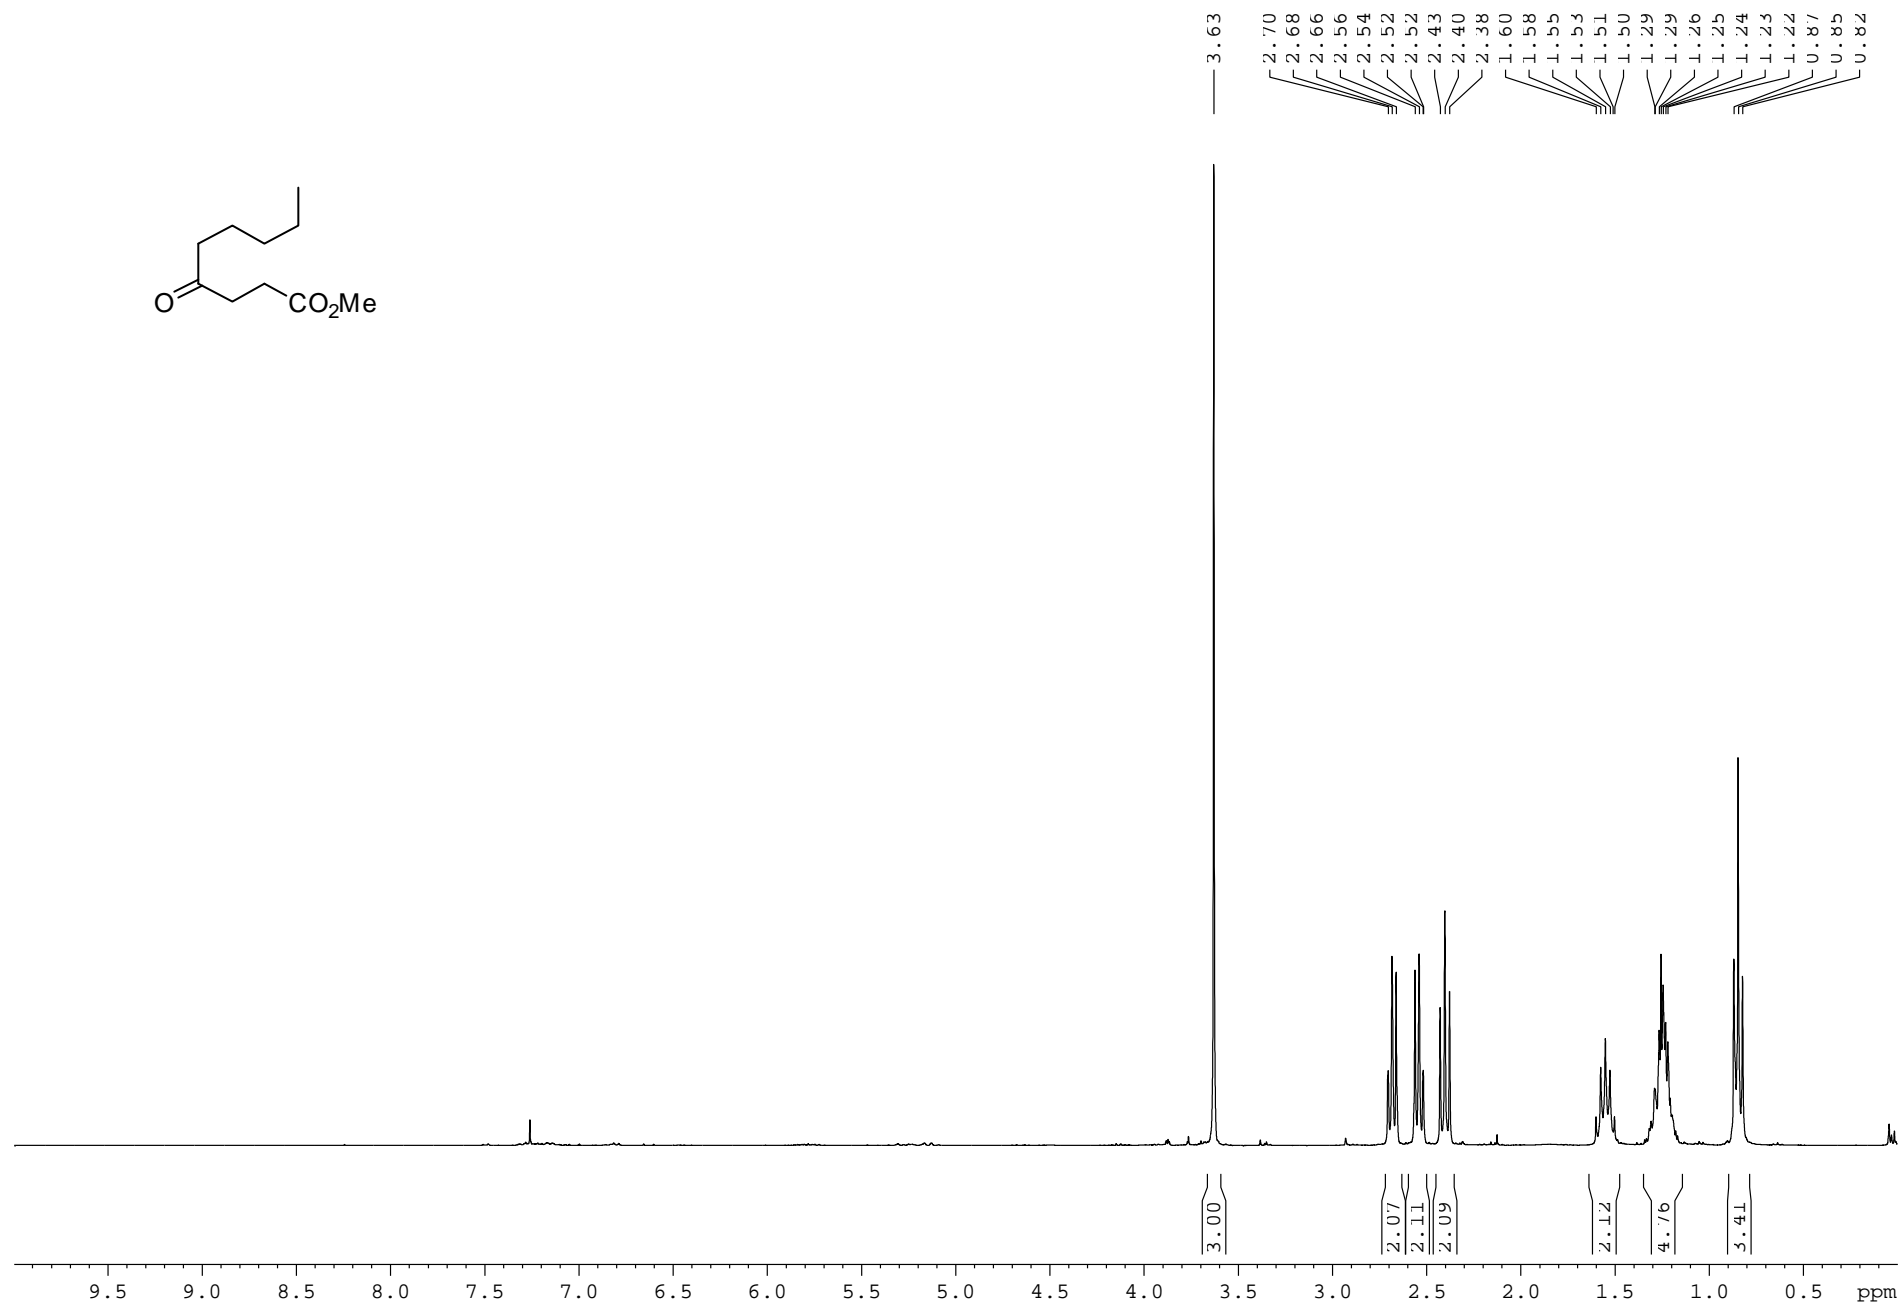

$^{13}\text{C}$  NMR-APT ( $\text{CDCl}_3$ , 75 MHz) of **6m**

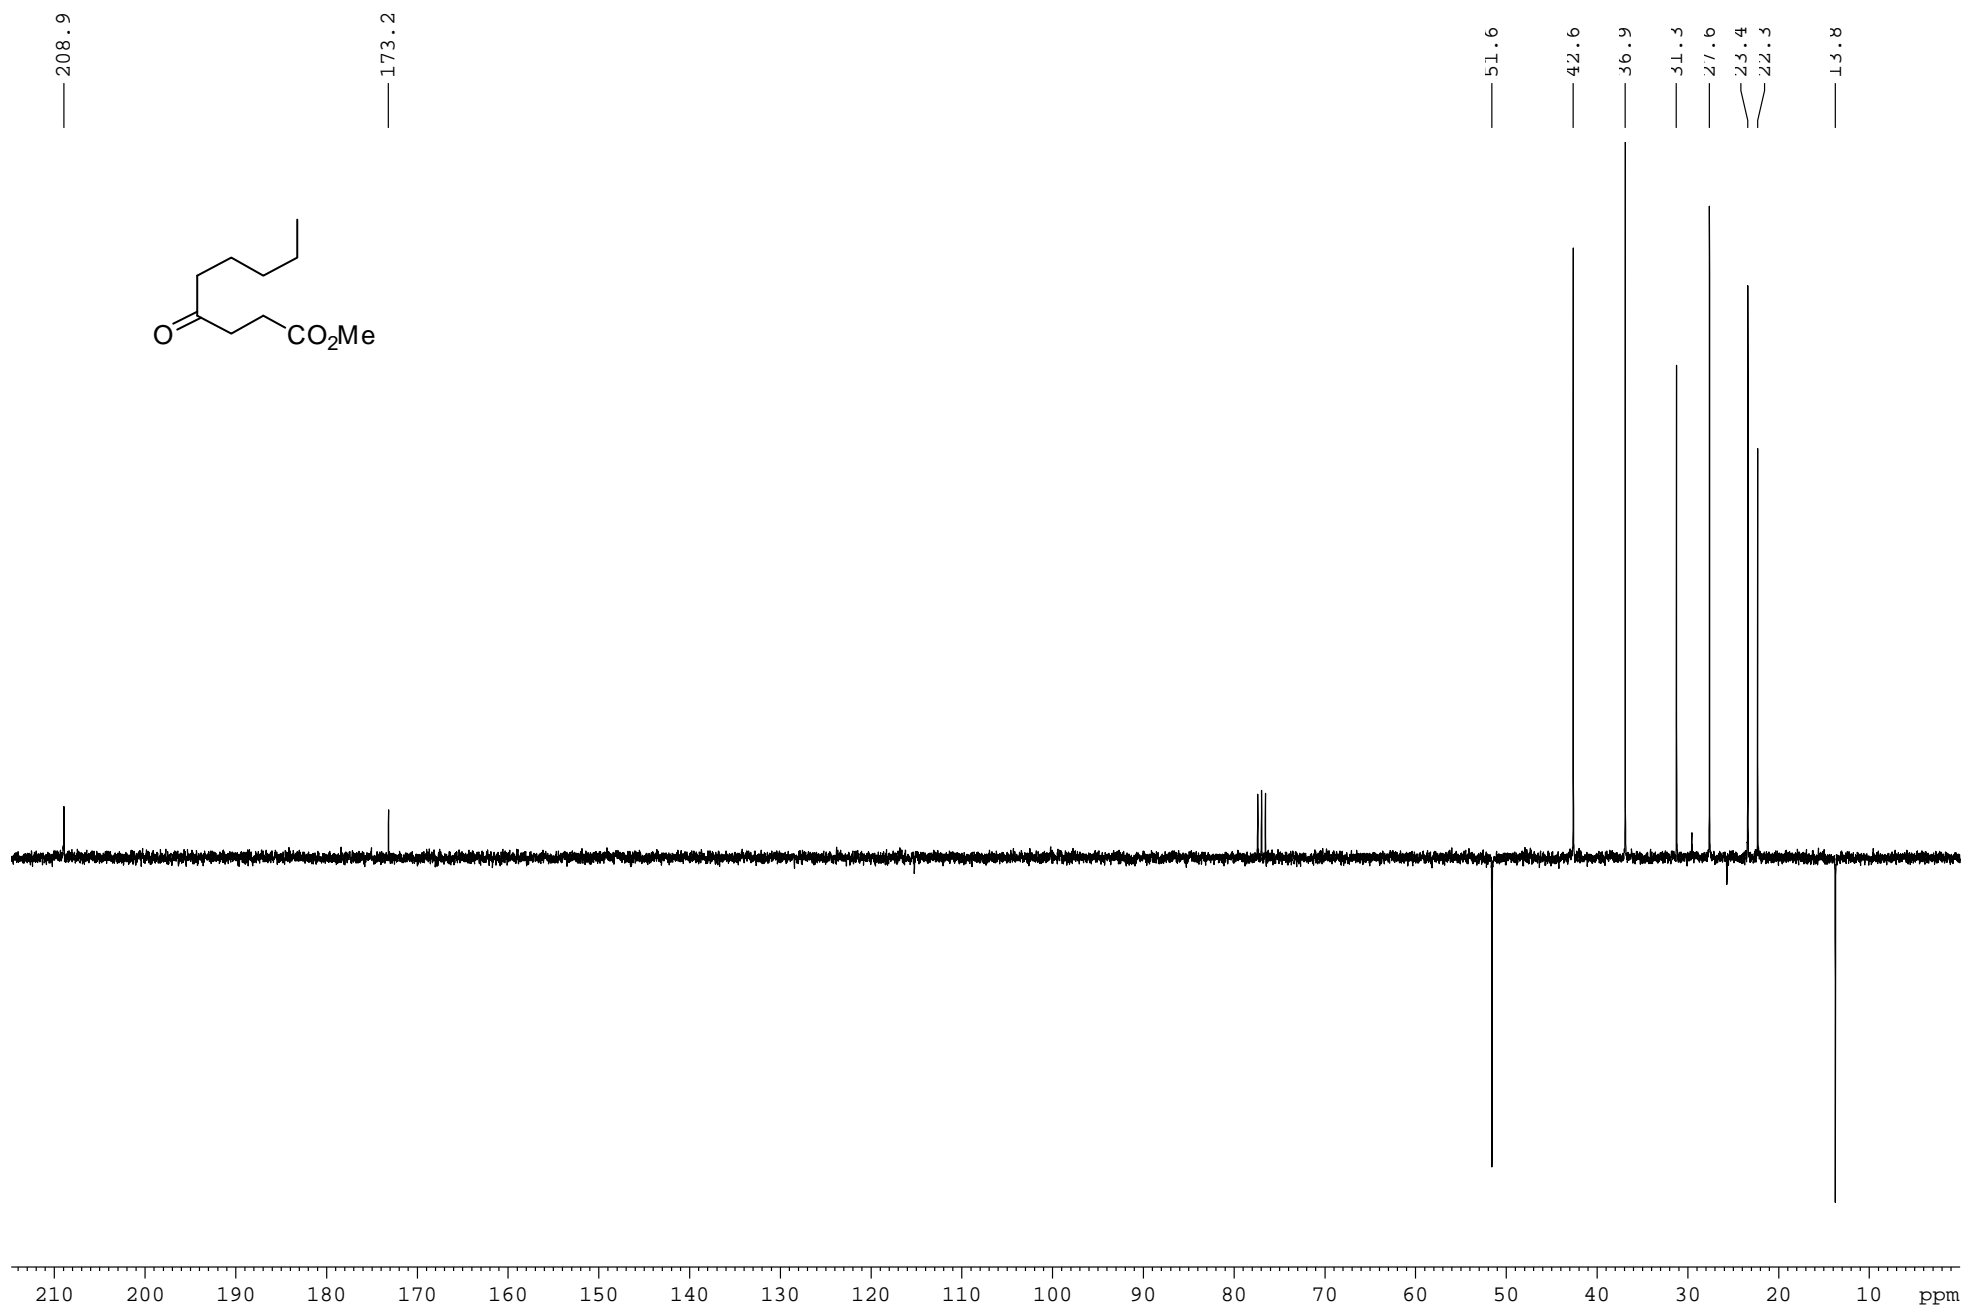

$^1\text{H}$  NMR ( $\text{CDCl}_3$ , 300 MHz) of **6n**

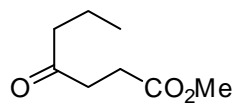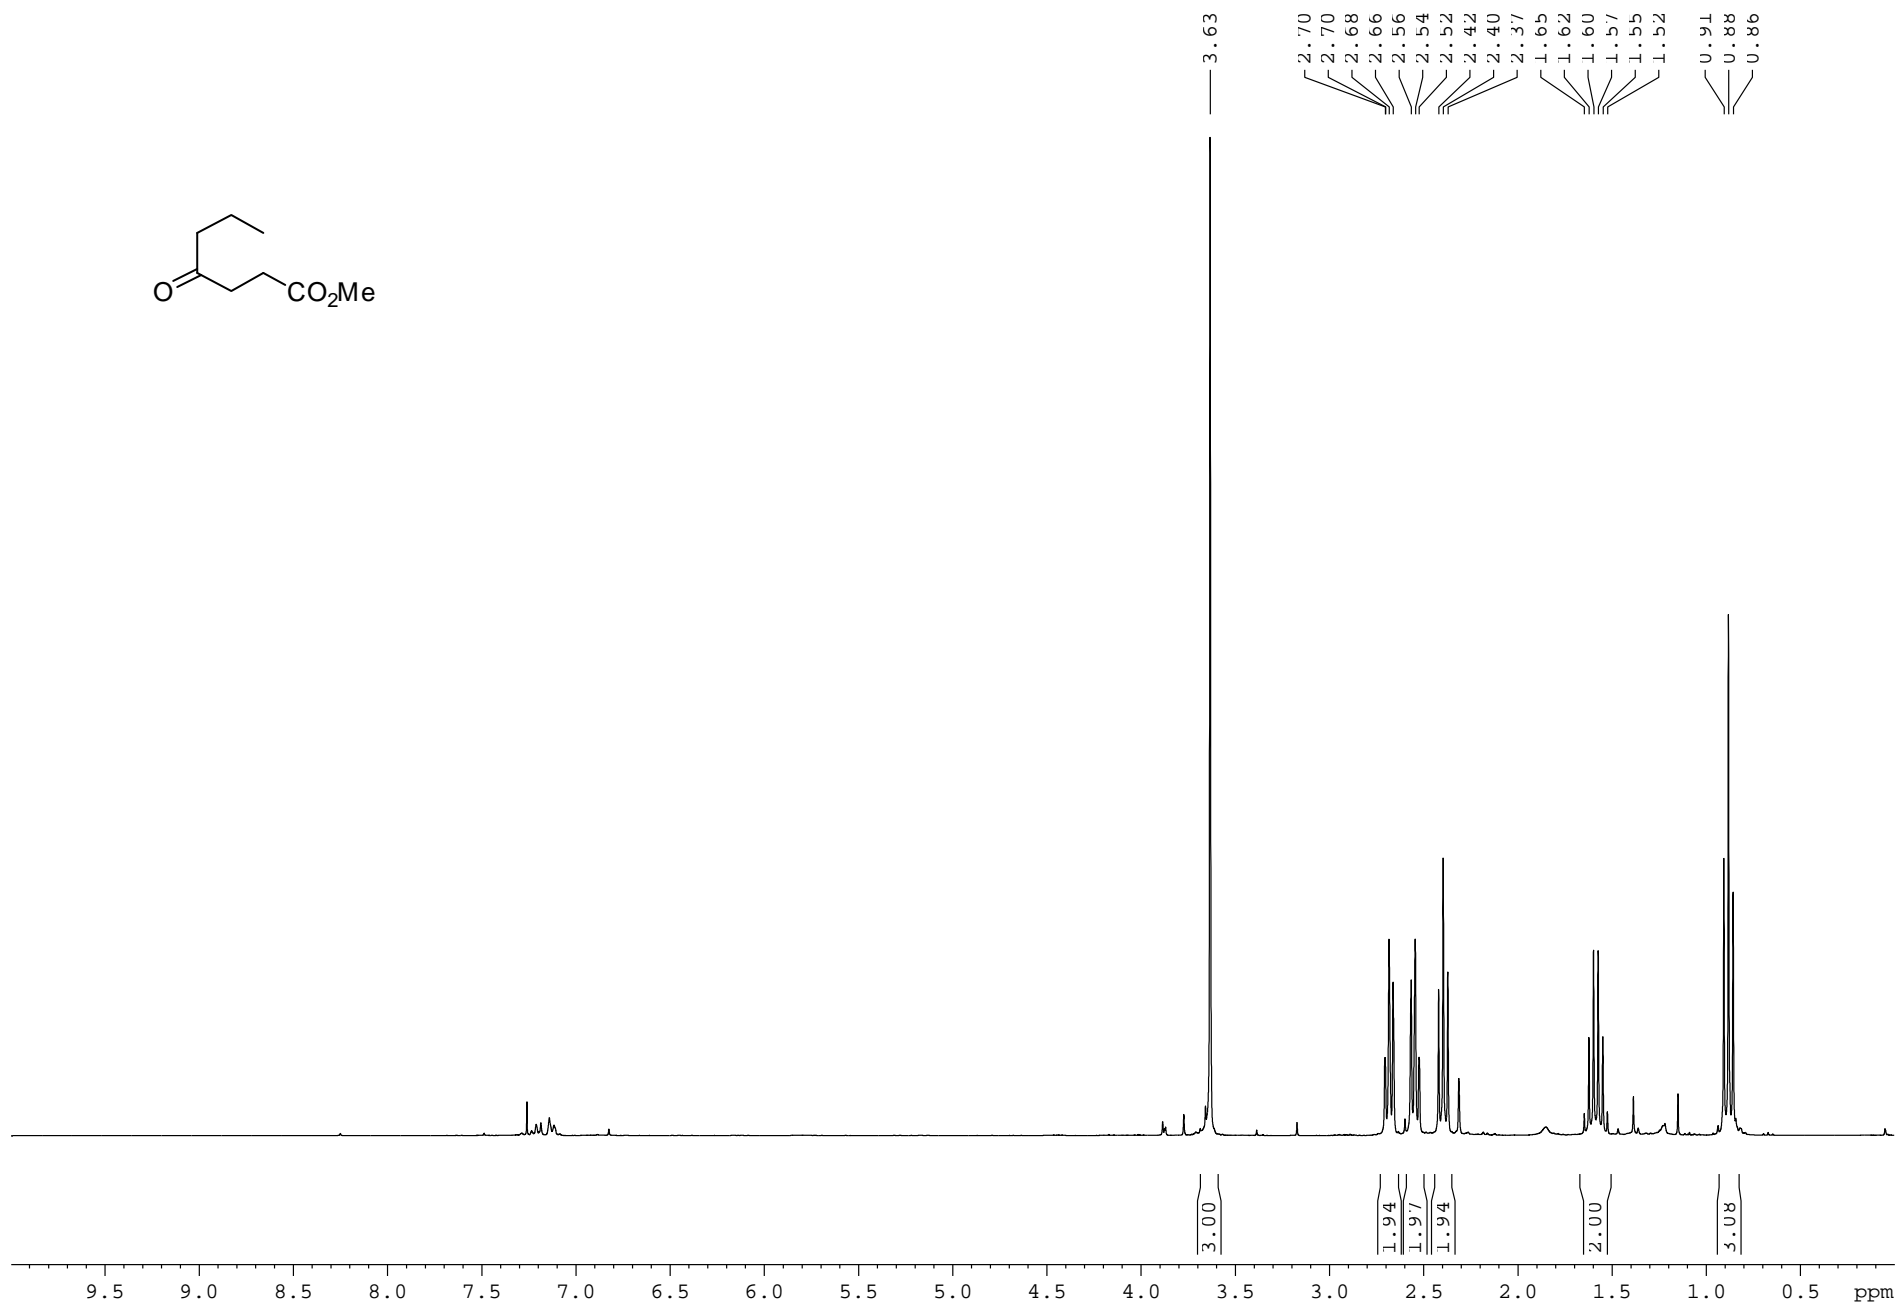



$^{13}\text{C}$  NMR-APT ( $\text{CDCl}_3$ , 75 MHz) of **6n**

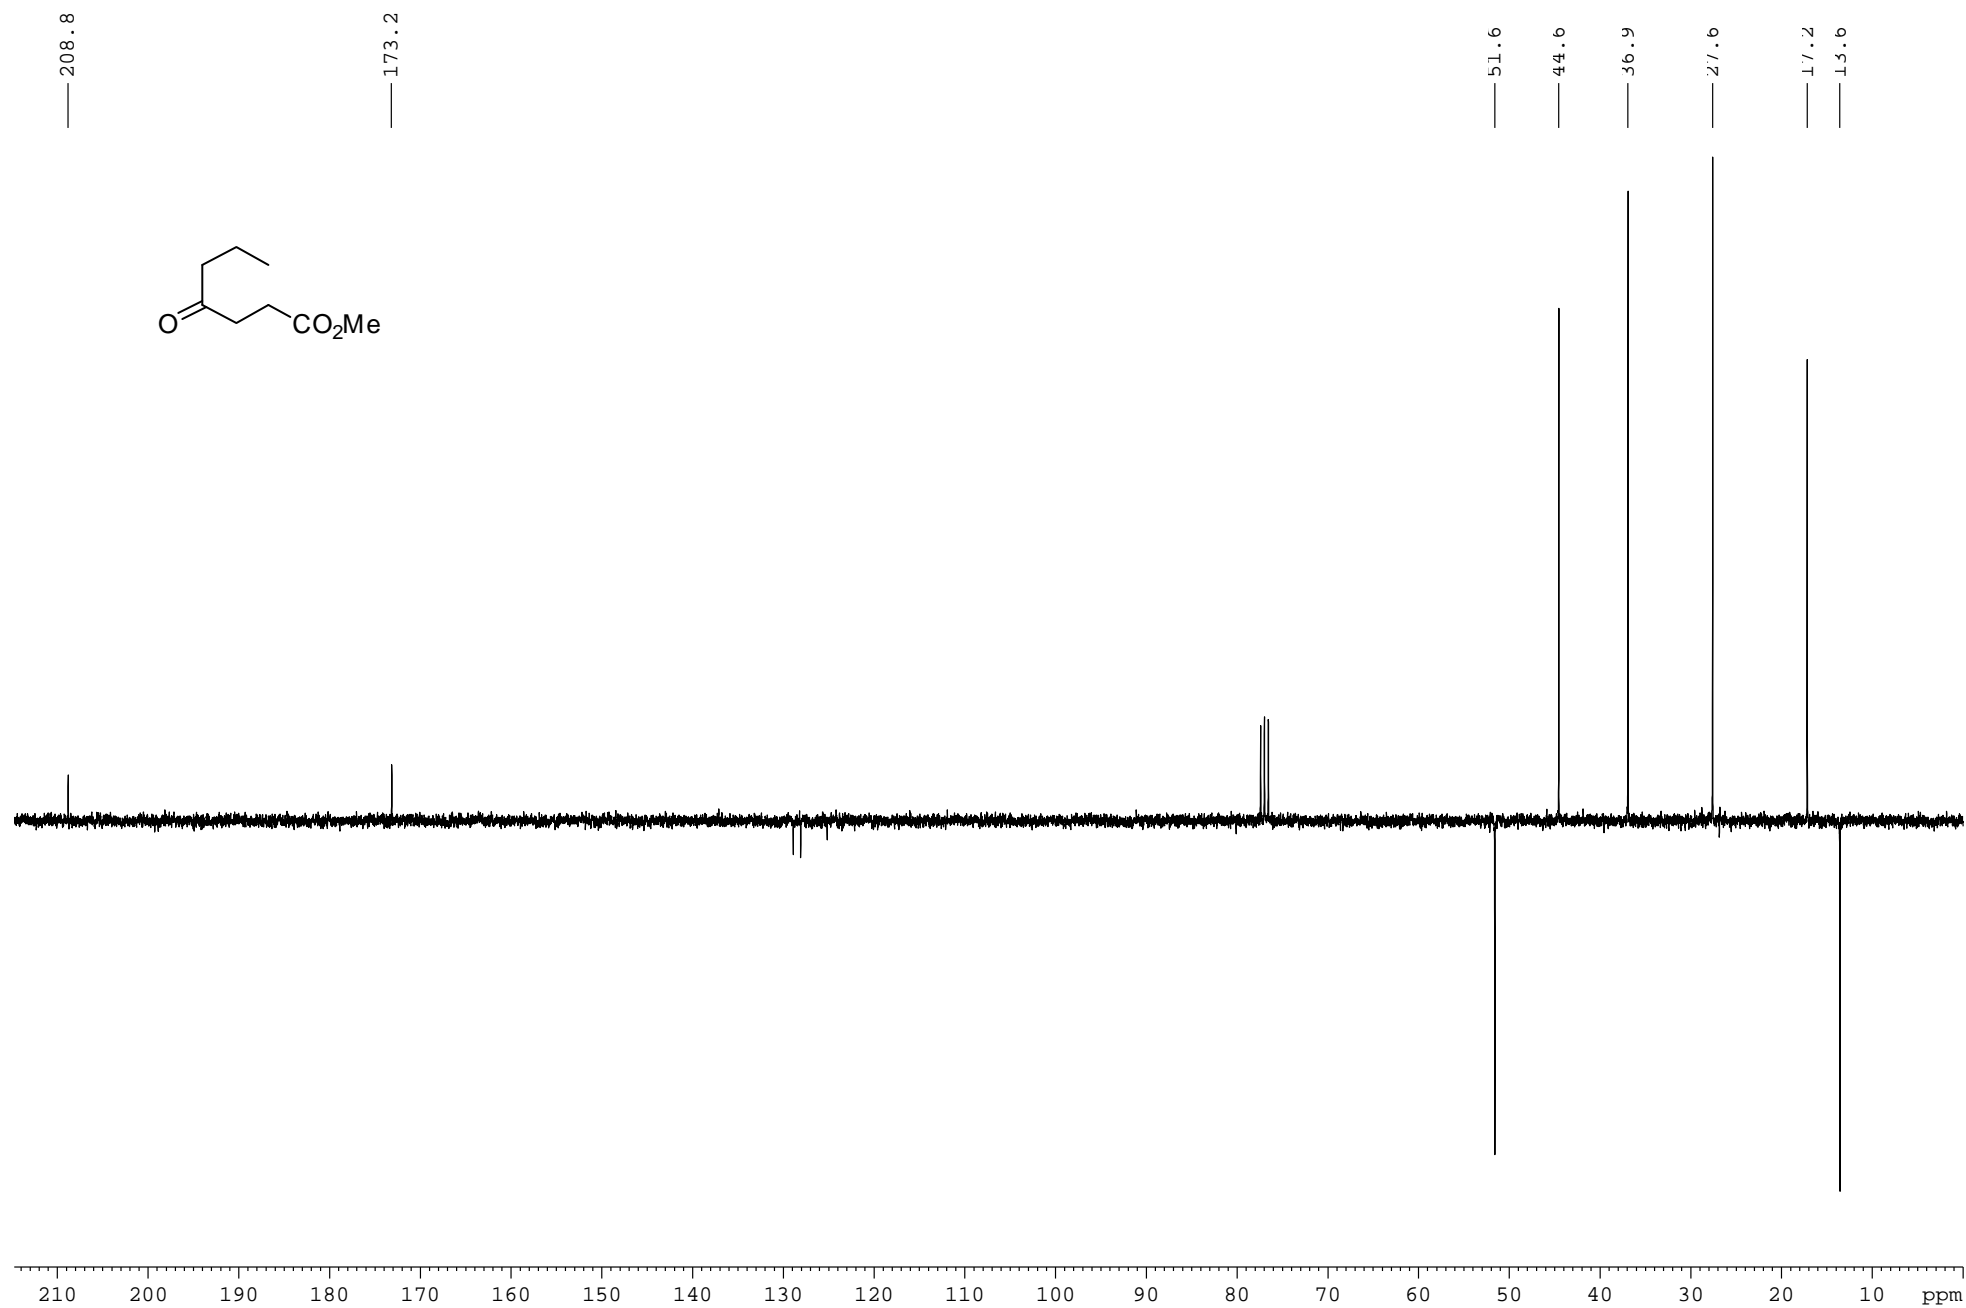

$^1\text{H}$  NMR ( $\text{CDCl}_3$ , 300 MHz) of **60**

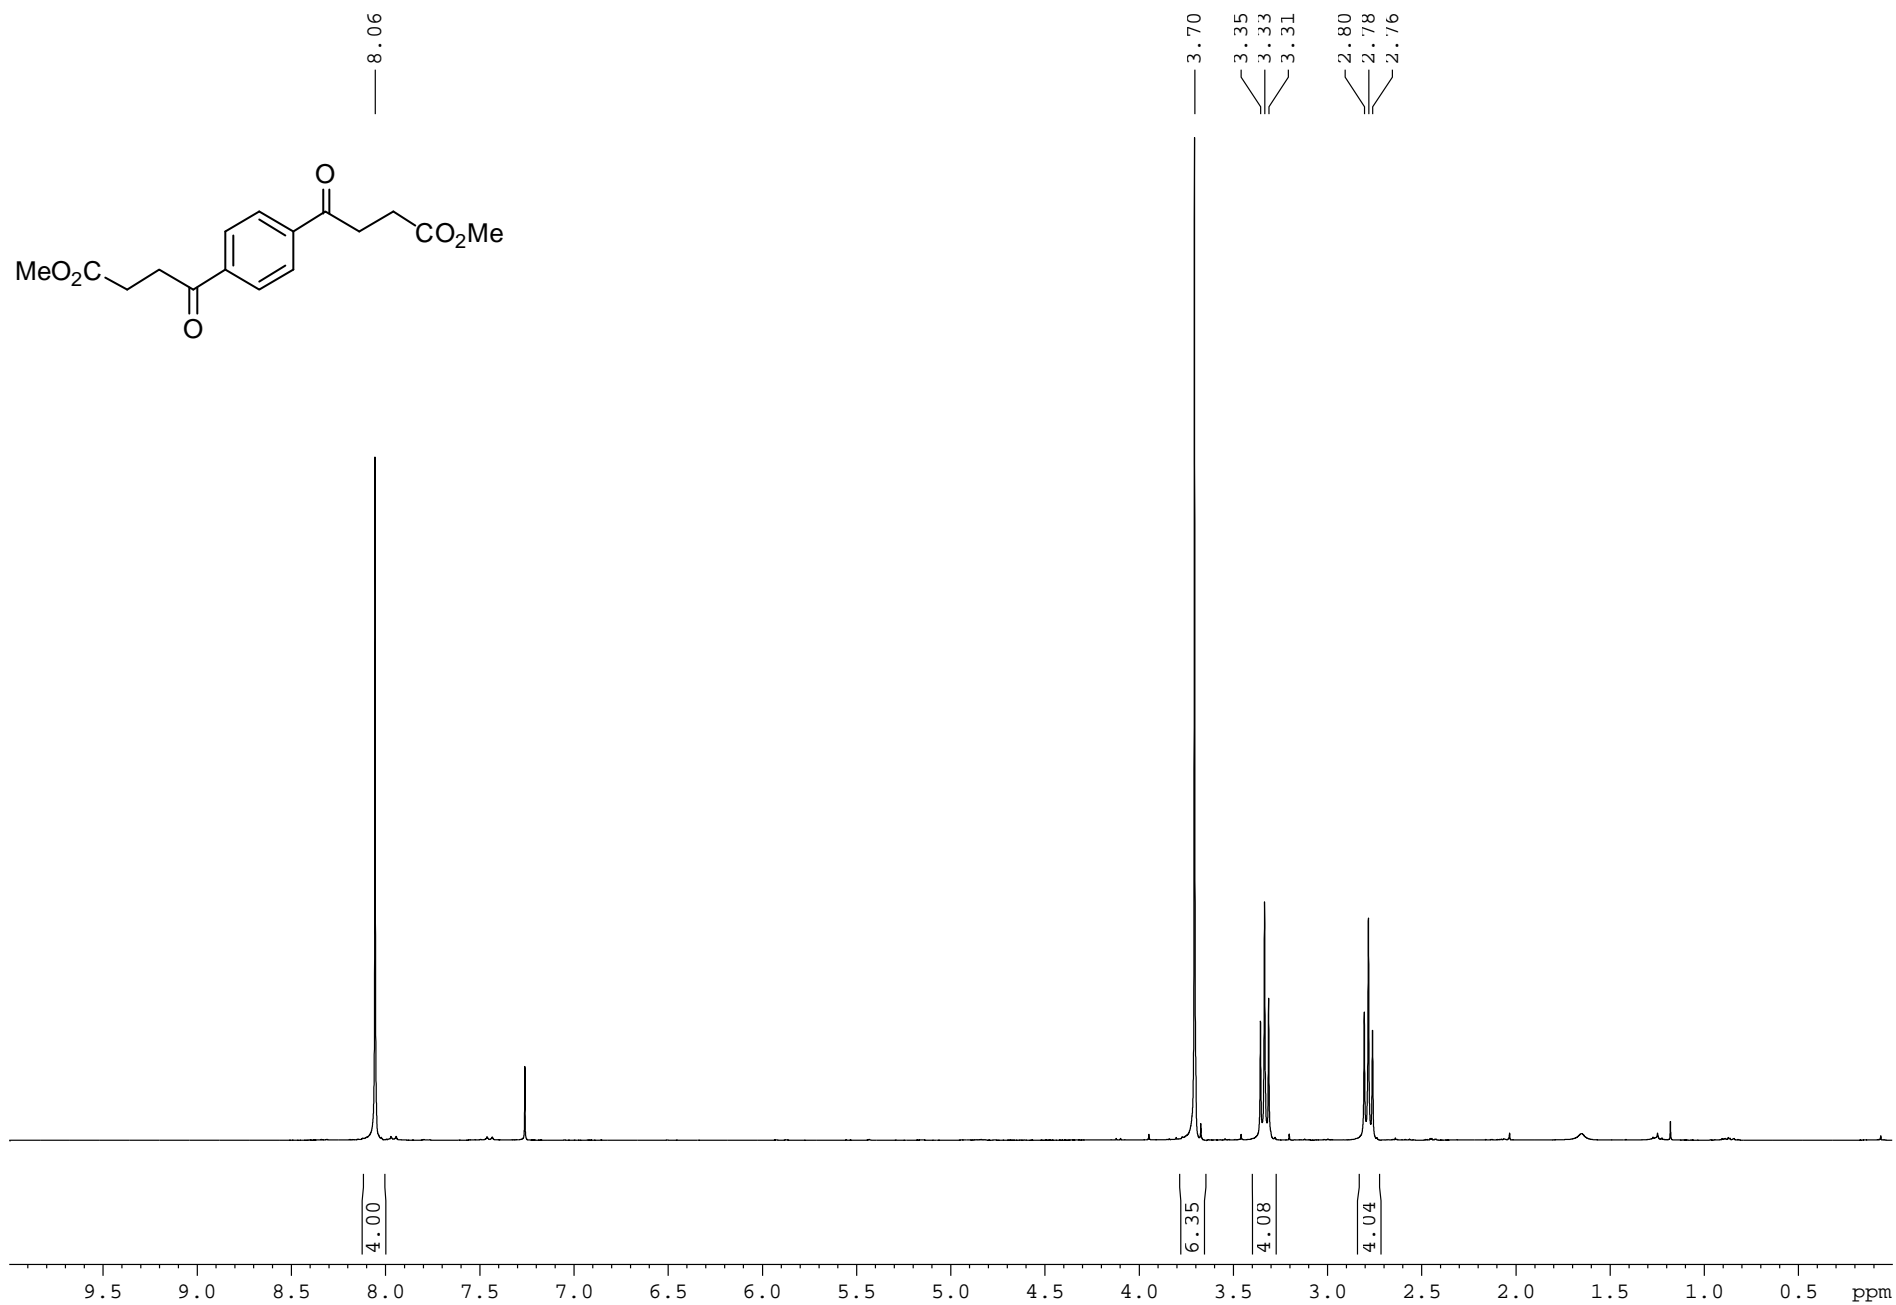

$^{13}\text{C}$  NMR-APT ( $\text{CDCl}_3$ , 75 MHz) of **60**

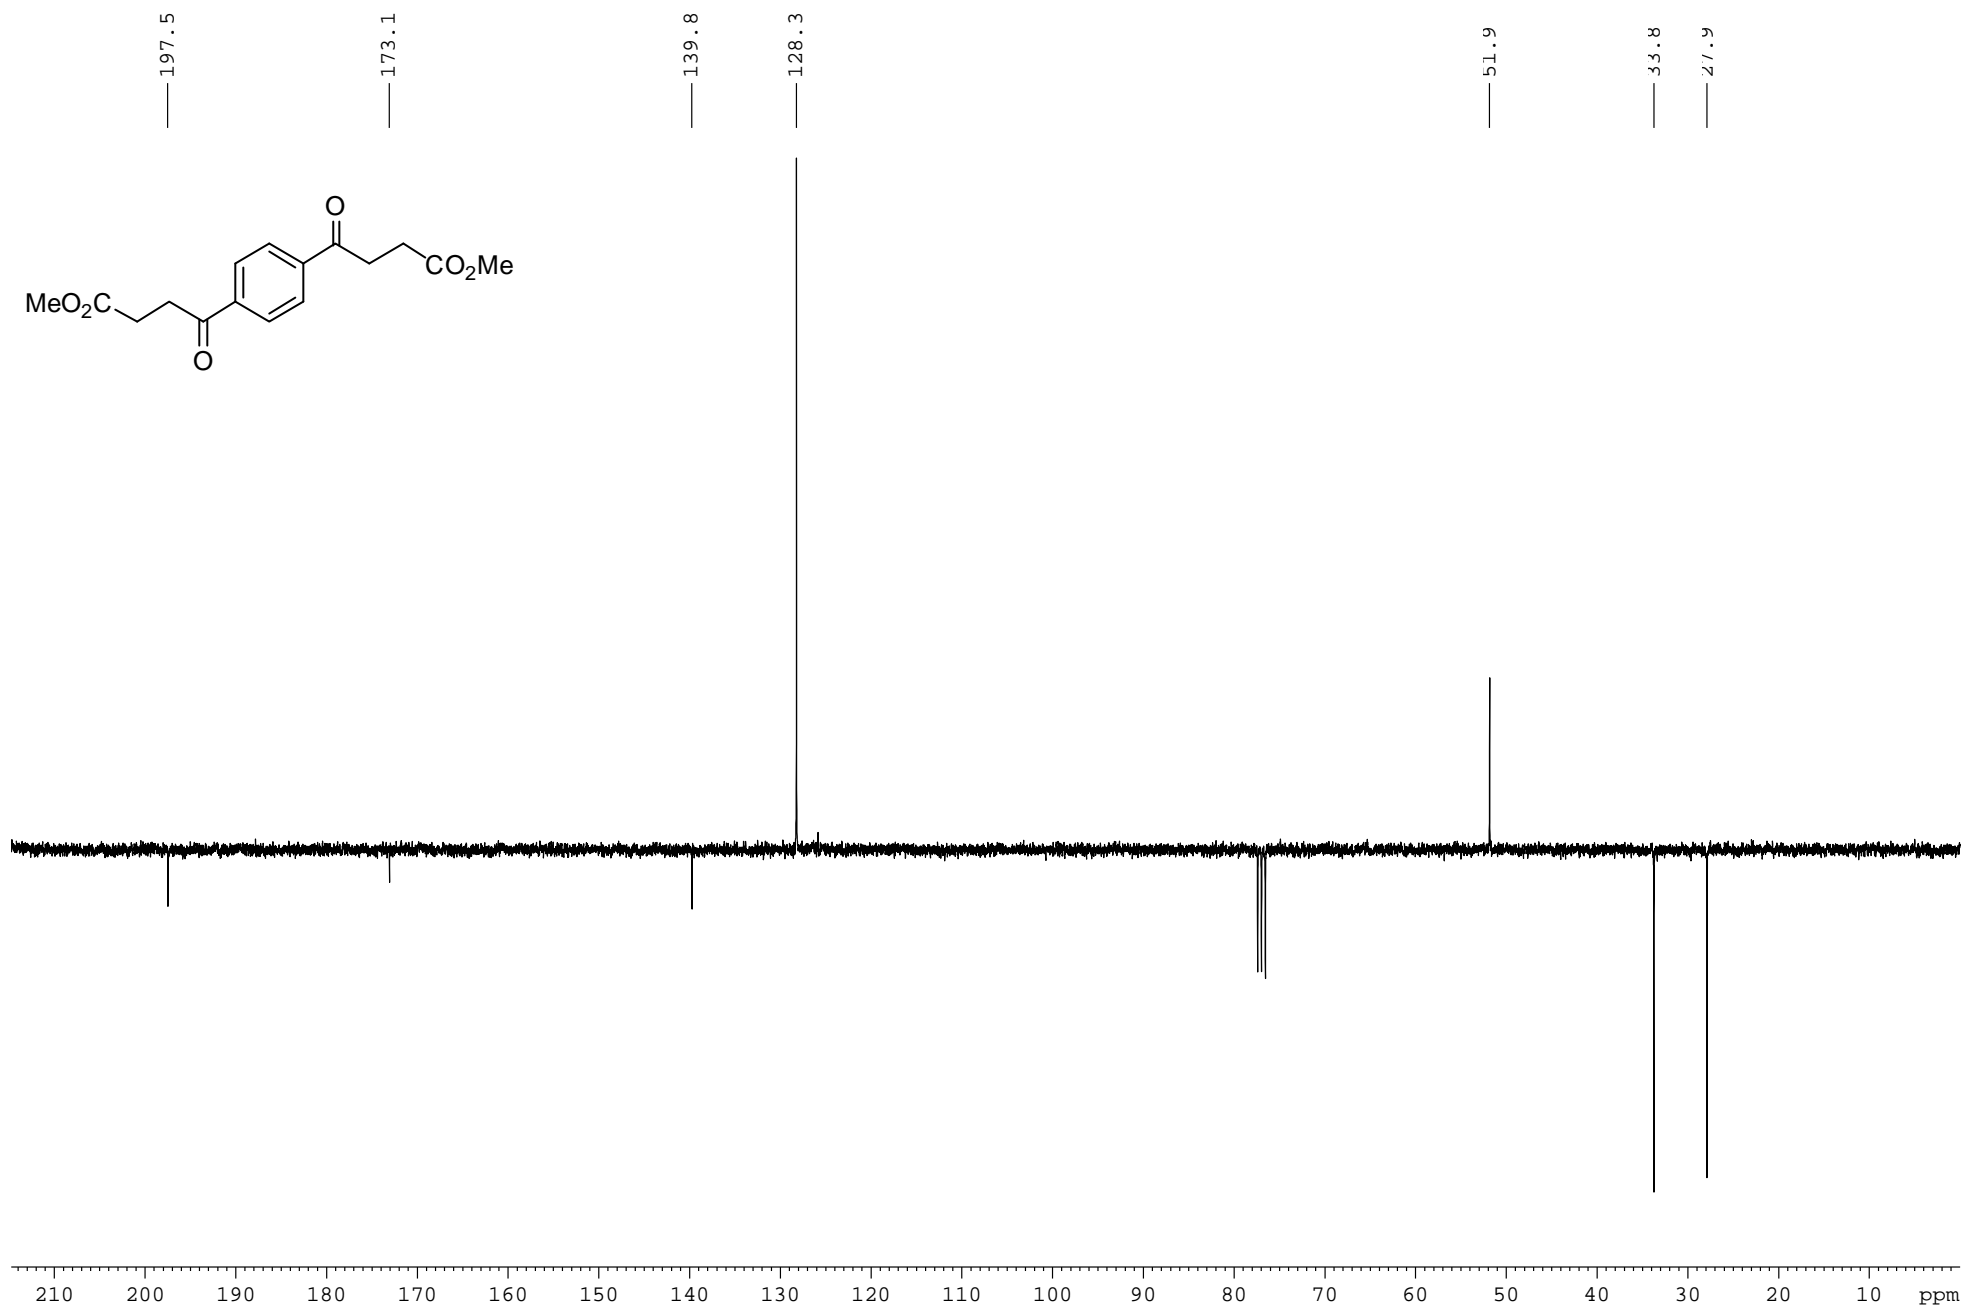

$^1\text{H}$  NMR ( $\text{CDCl}_3$ , 300 MHz) of **6p**

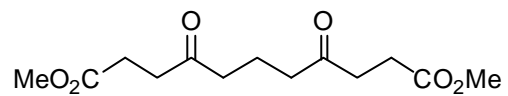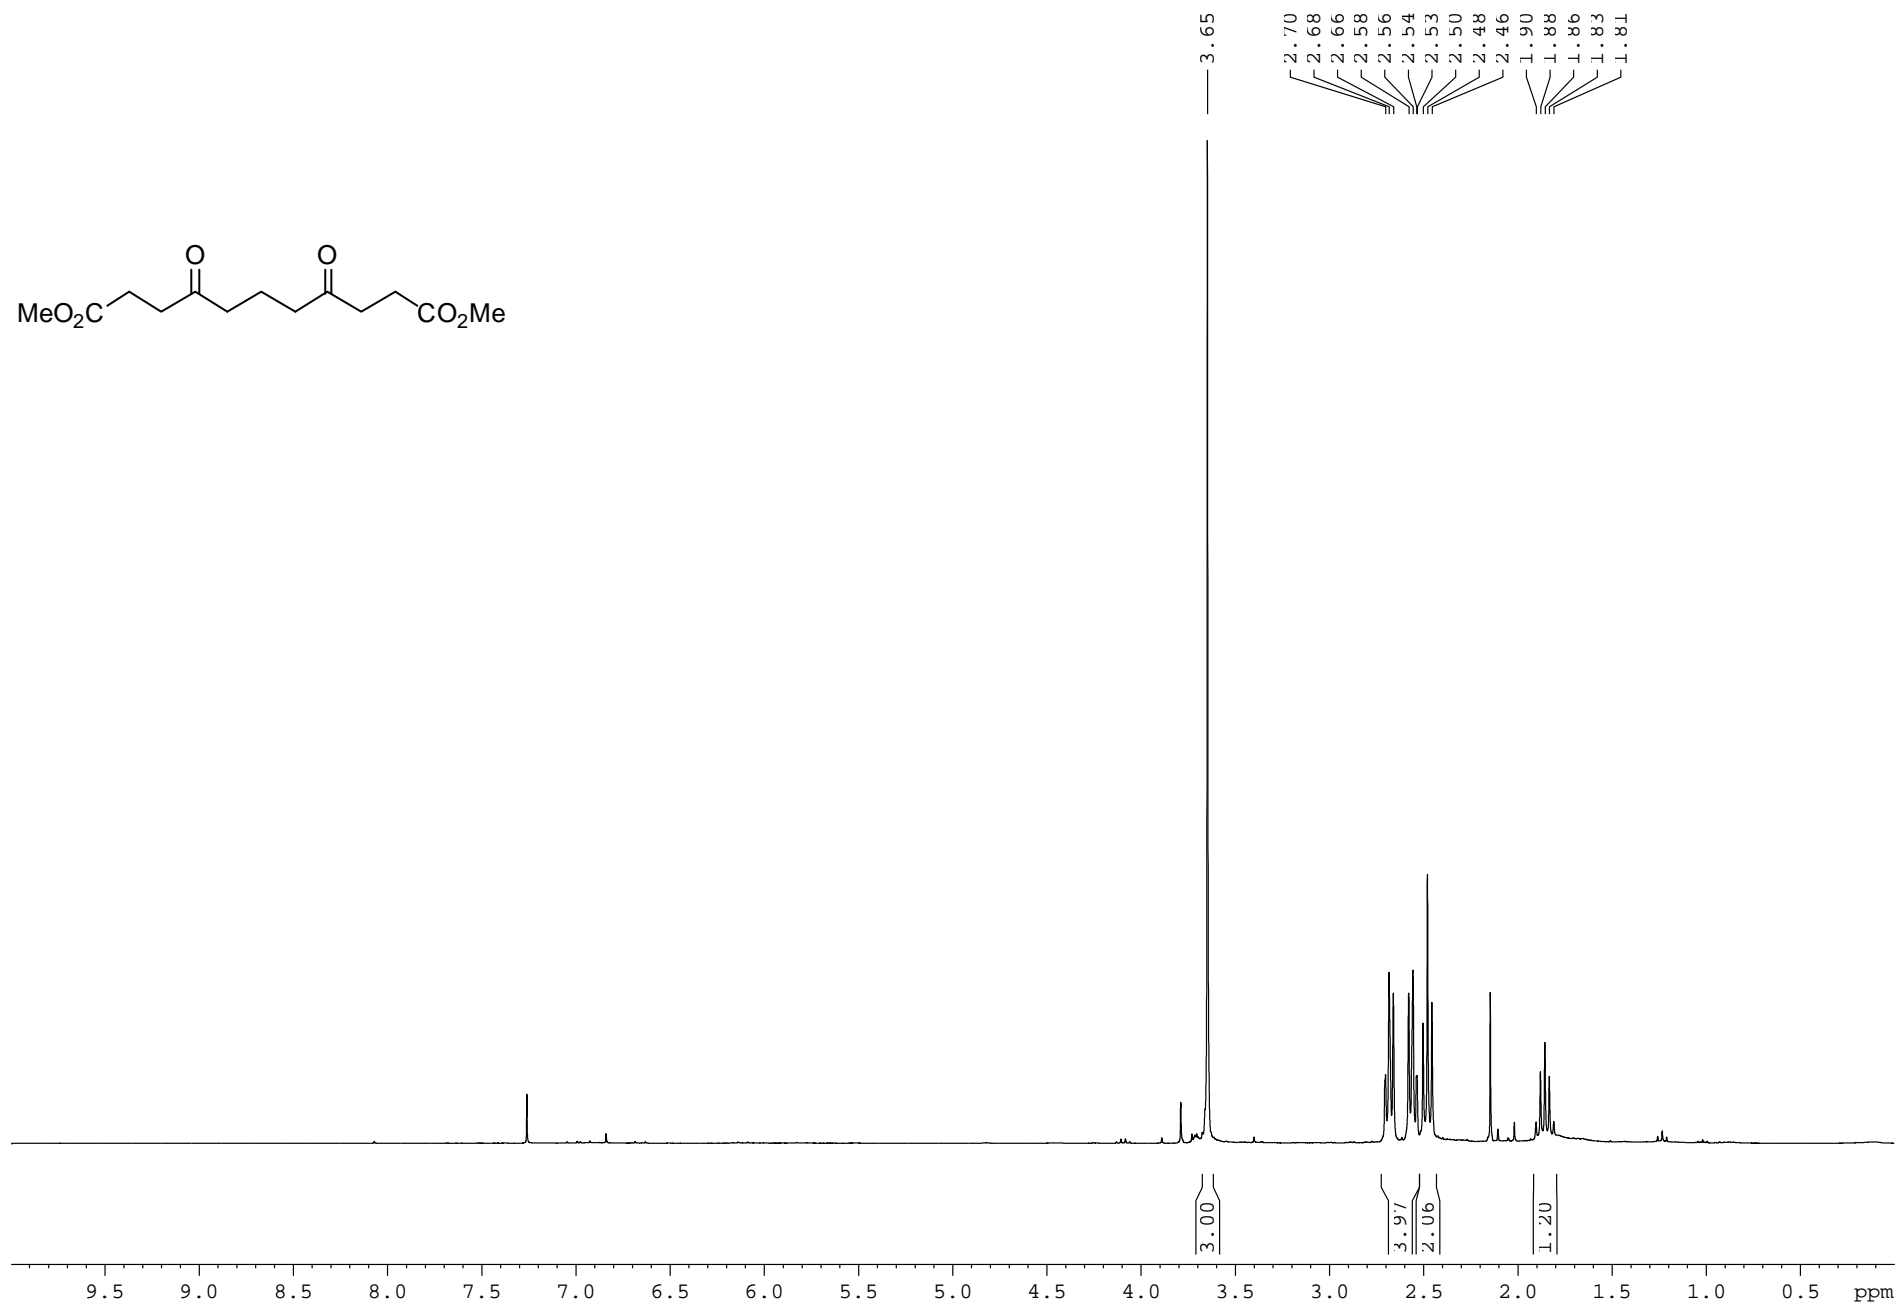

$^{13}\text{C}$  NMR-APT ( $\text{CDCl}_3$ , 75 MHz) of **6p**

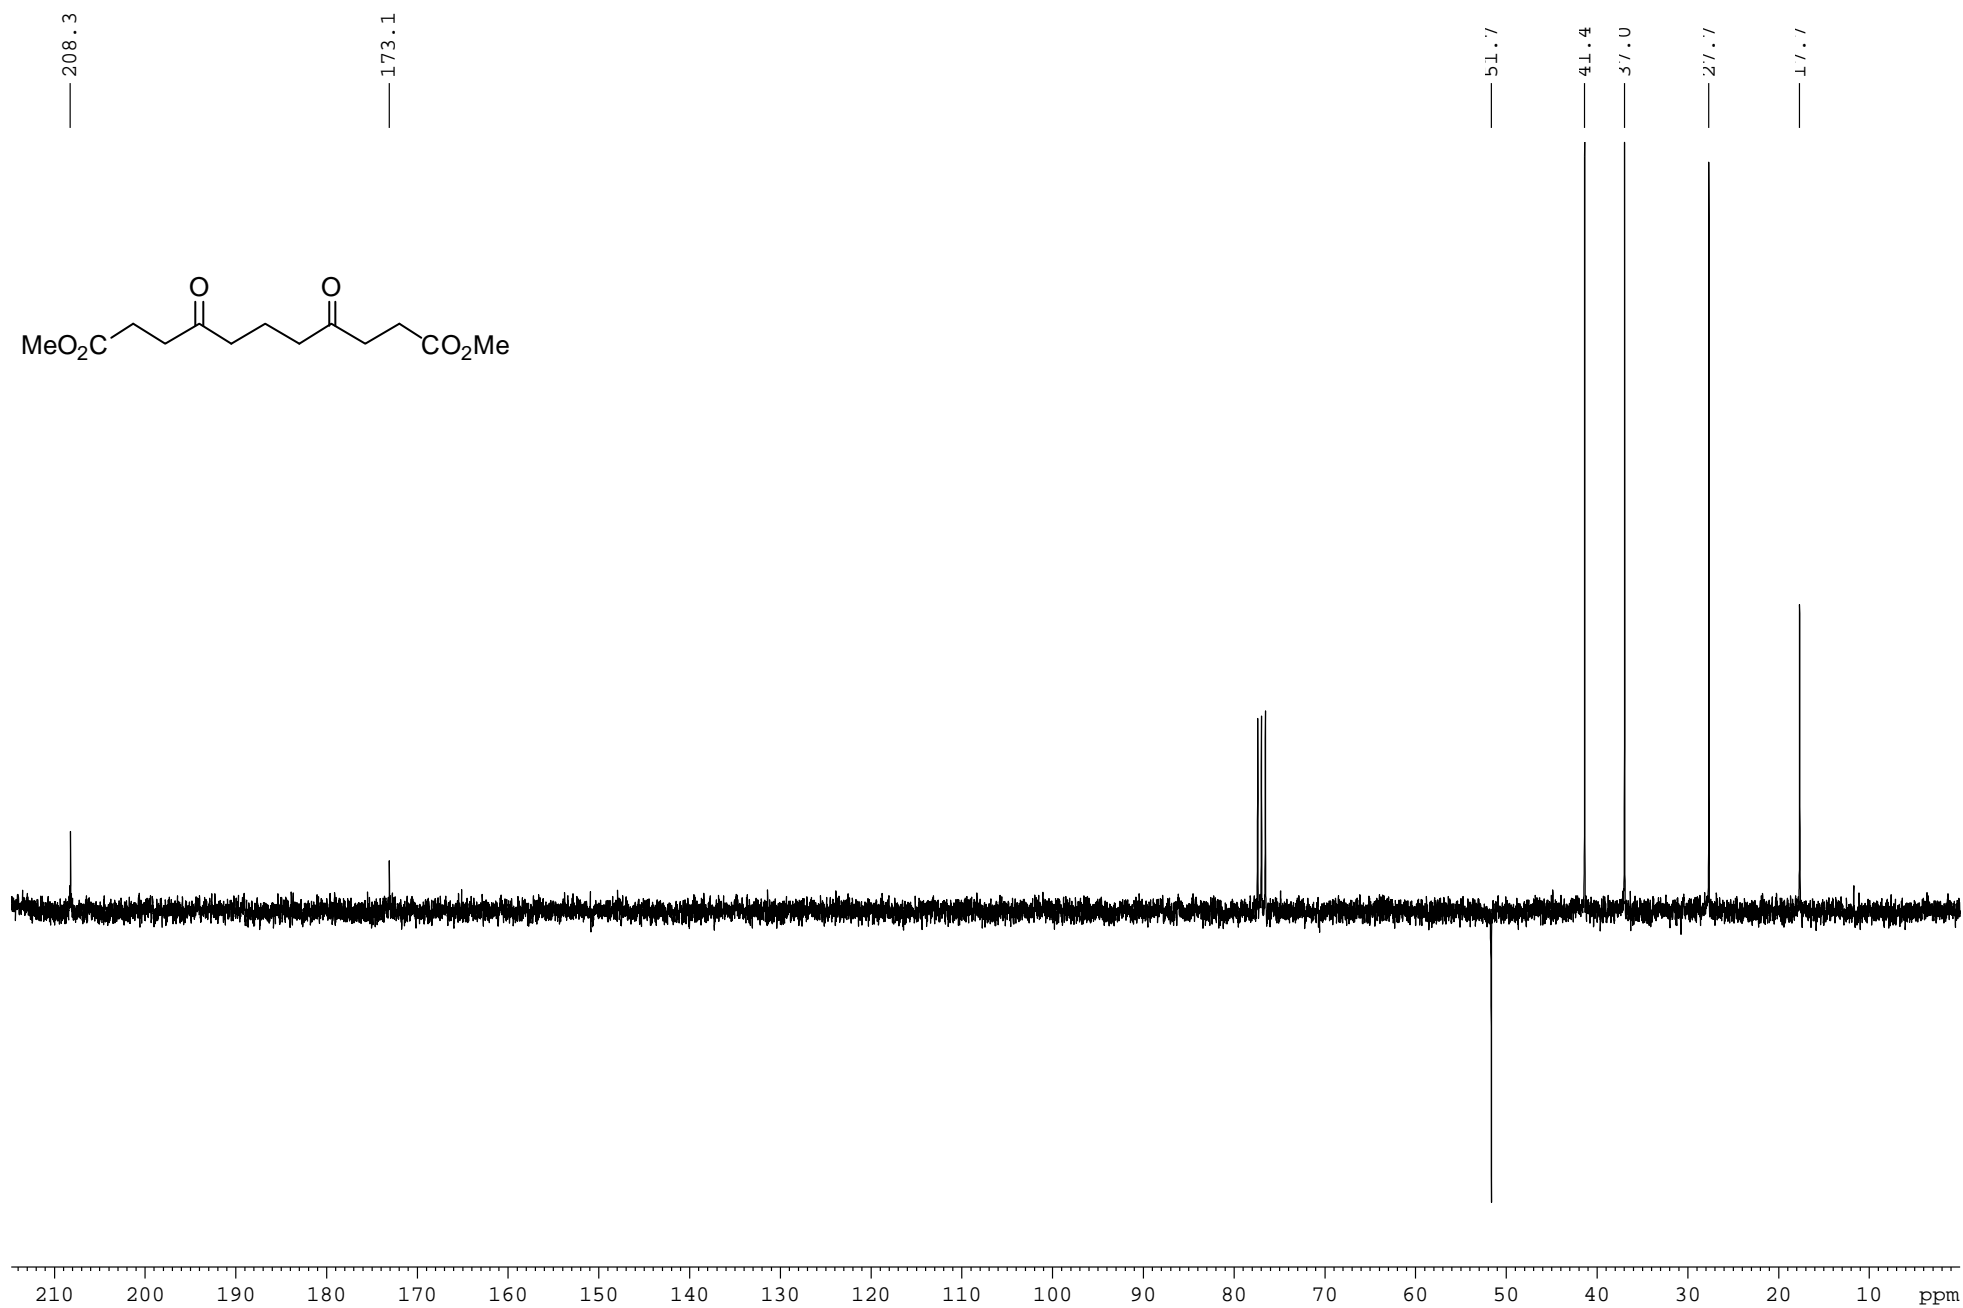

**E Copies of NMR spectra of compounds 7, 8a, 8b, 9a, 9b, 10 and 11**

<sup>1</sup>H NMR (CDCl<sub>3</sub>, 300 MHz) of 7

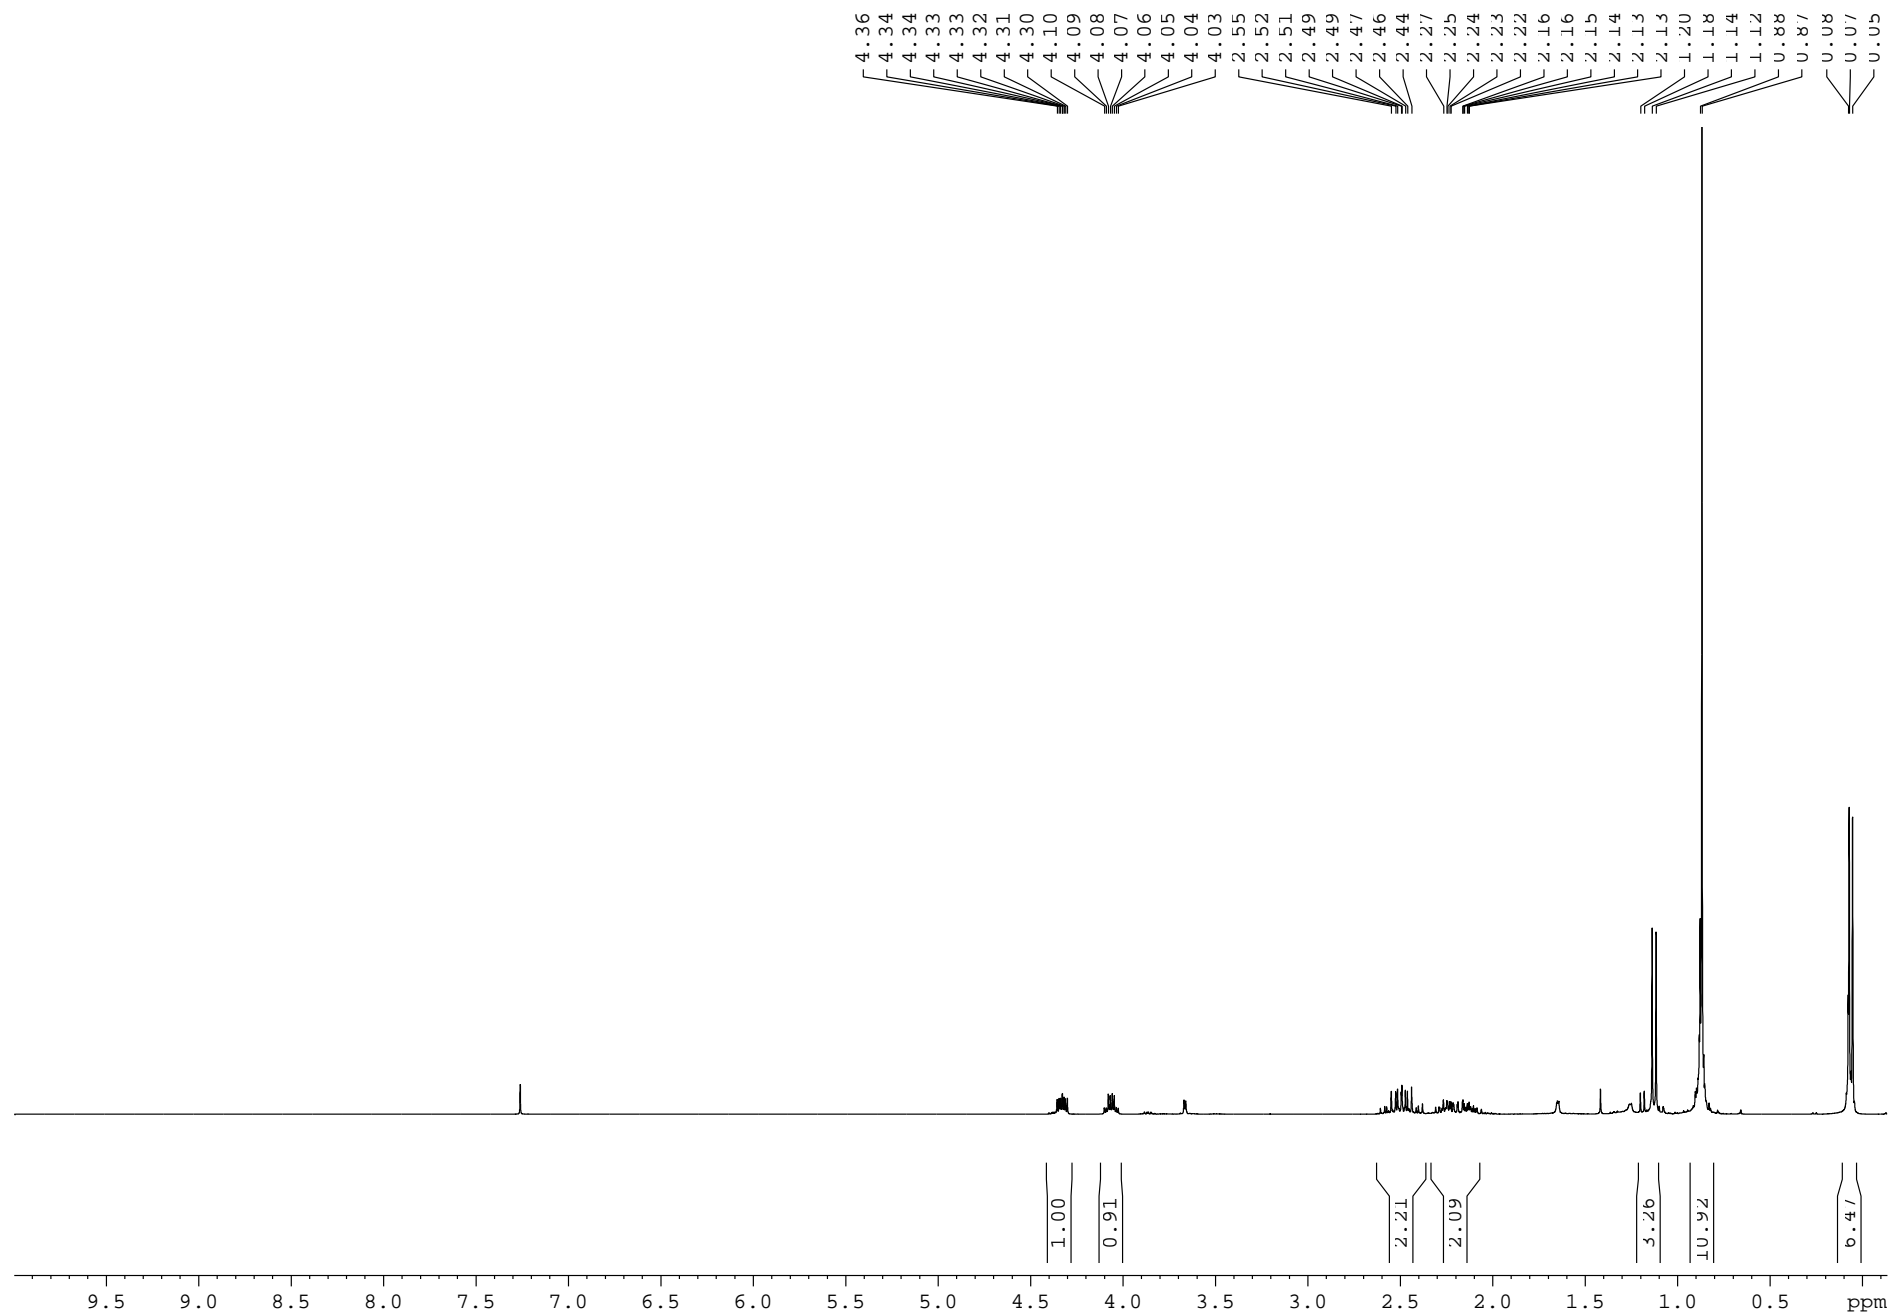

$^{13}\text{C}$  NMR-APT ( $\text{CDCl}_3$ , 75 MHz) of **7**

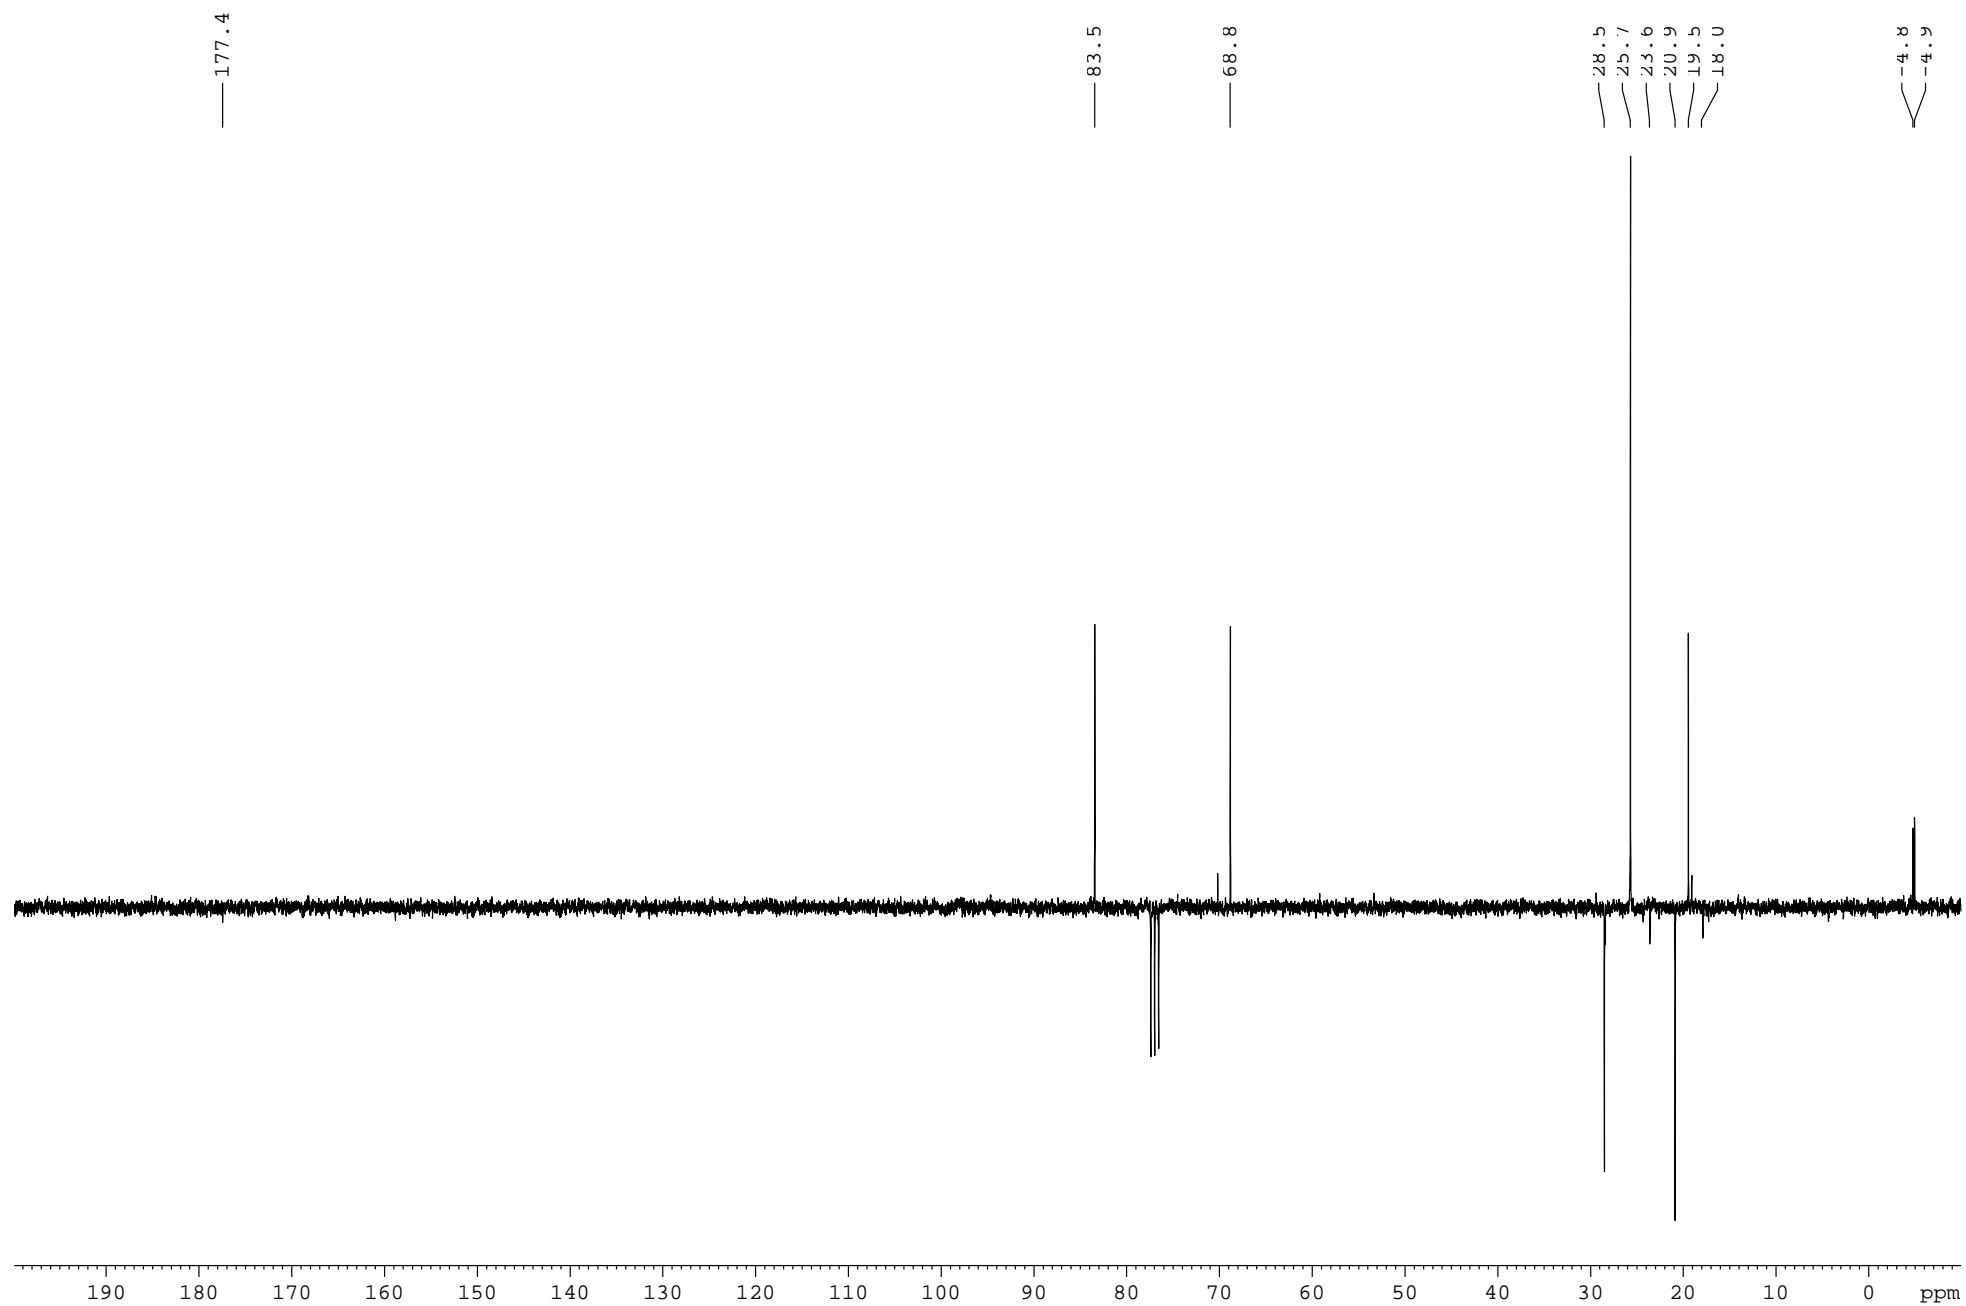

$^1\text{H}$  NMR ( $\text{CDCl}_3$ , 300 MHz) of **8a**

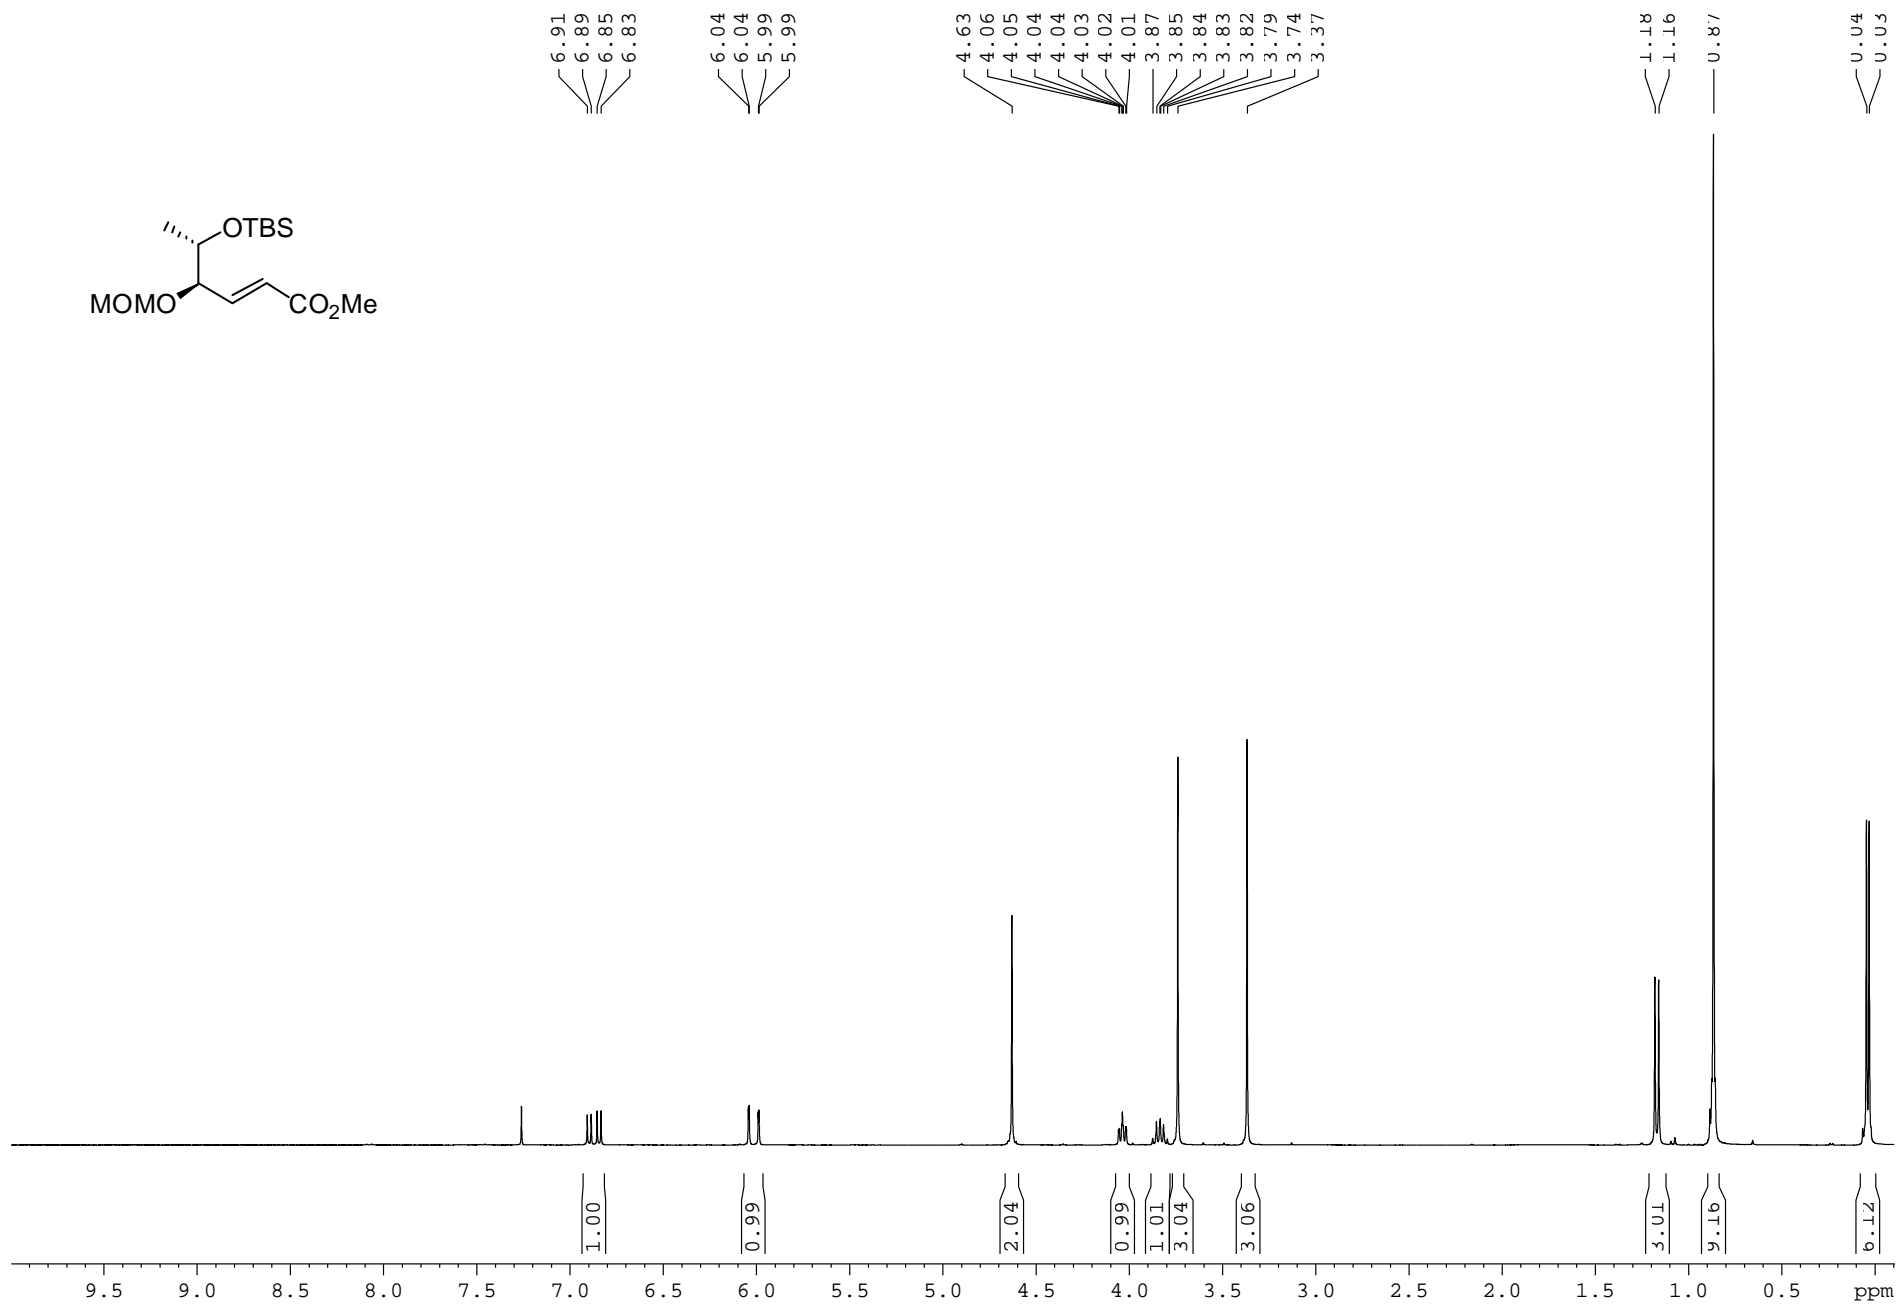



$^{13}\text{C}$  NMR-APT ( $\text{CDCl}_3$ , 75 MHz) of **8a**

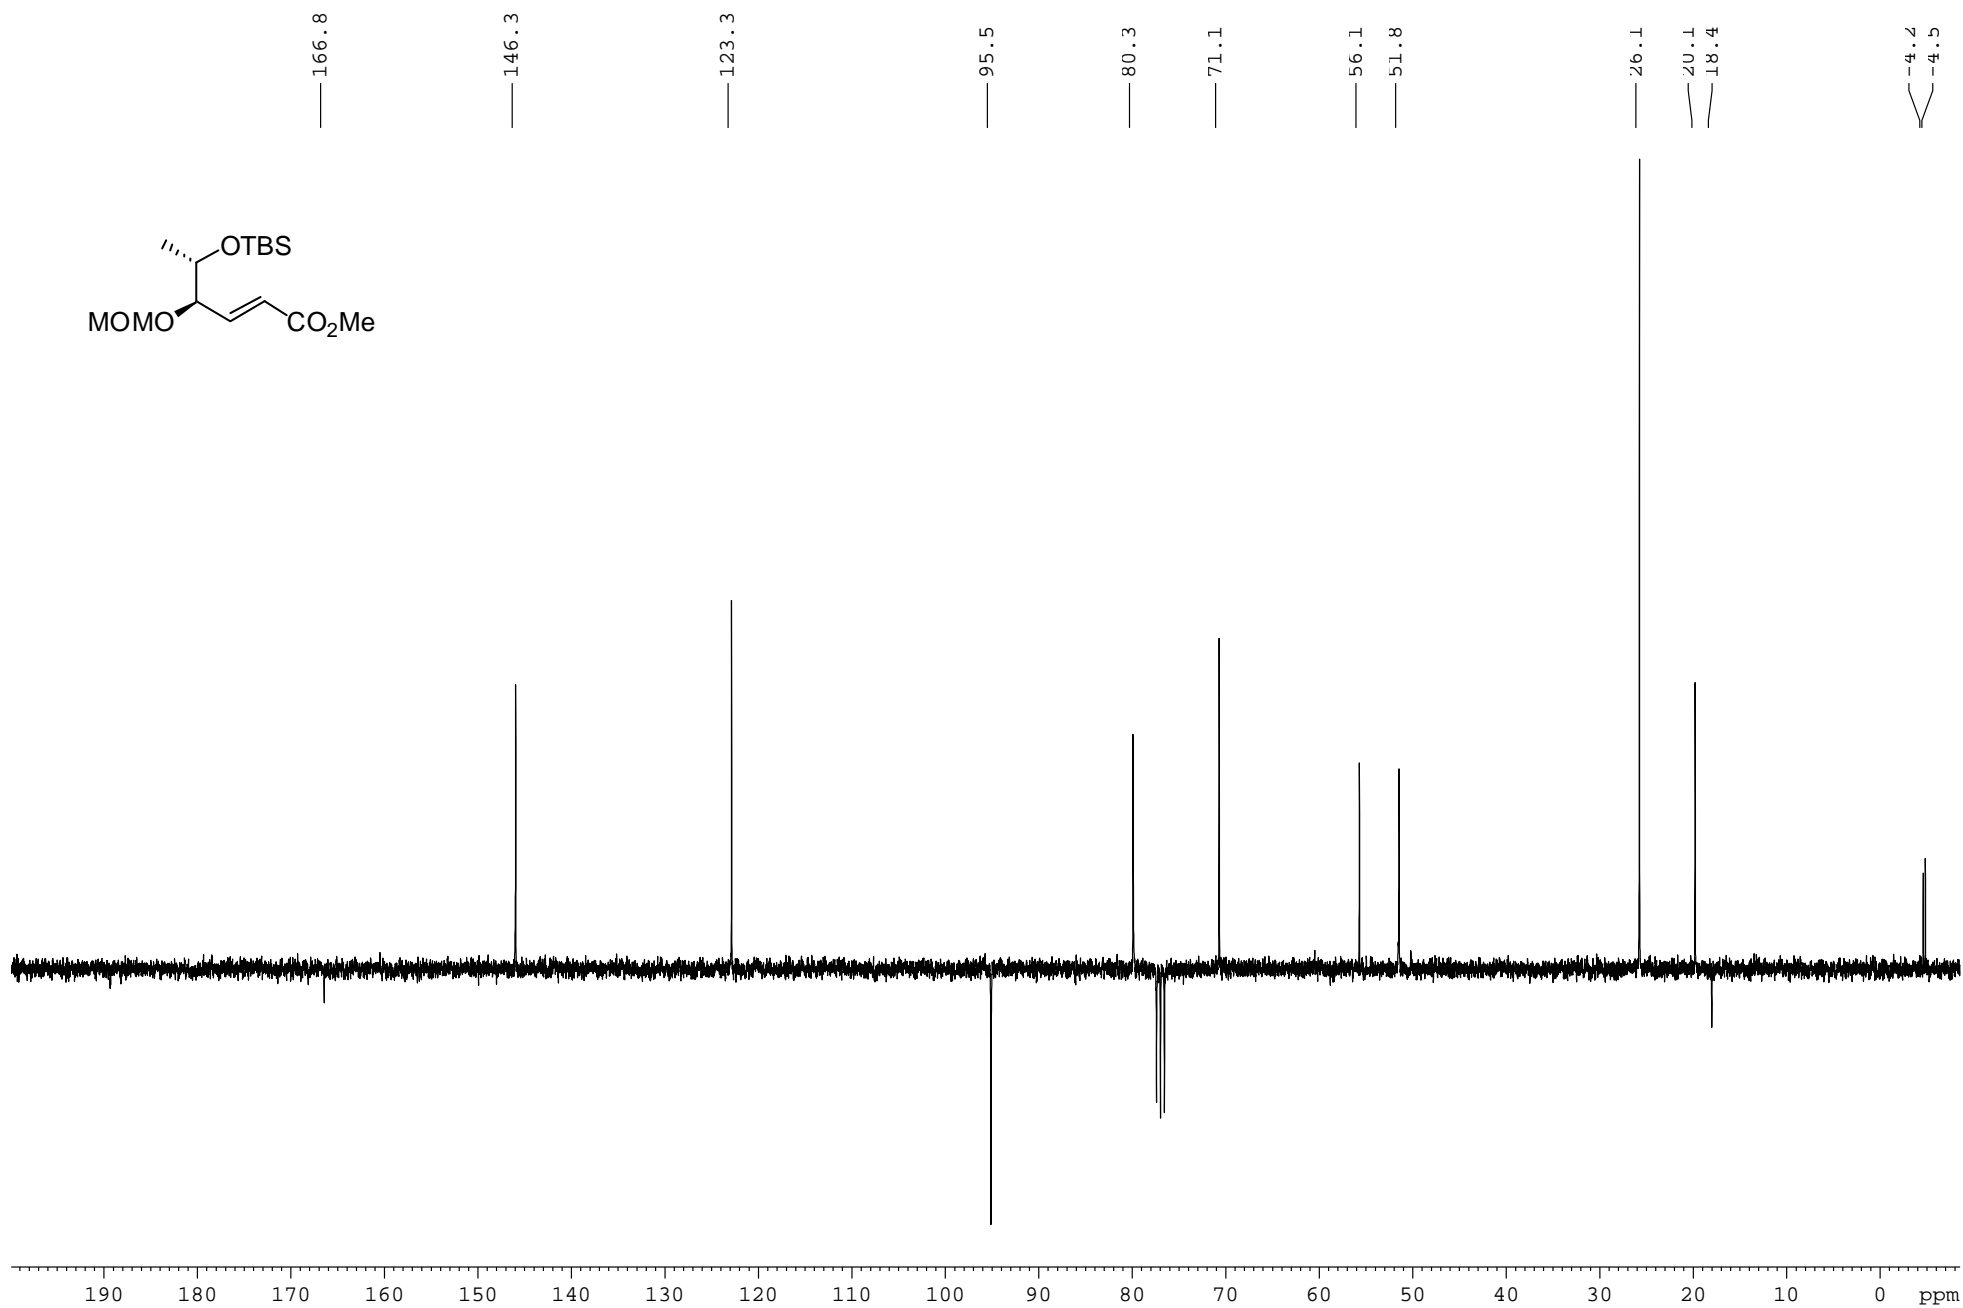

$^1\text{H}$  NMR ( $\text{CDCl}_3$ , 300 MHz) of **9a**

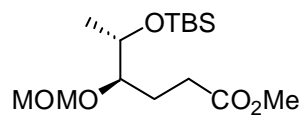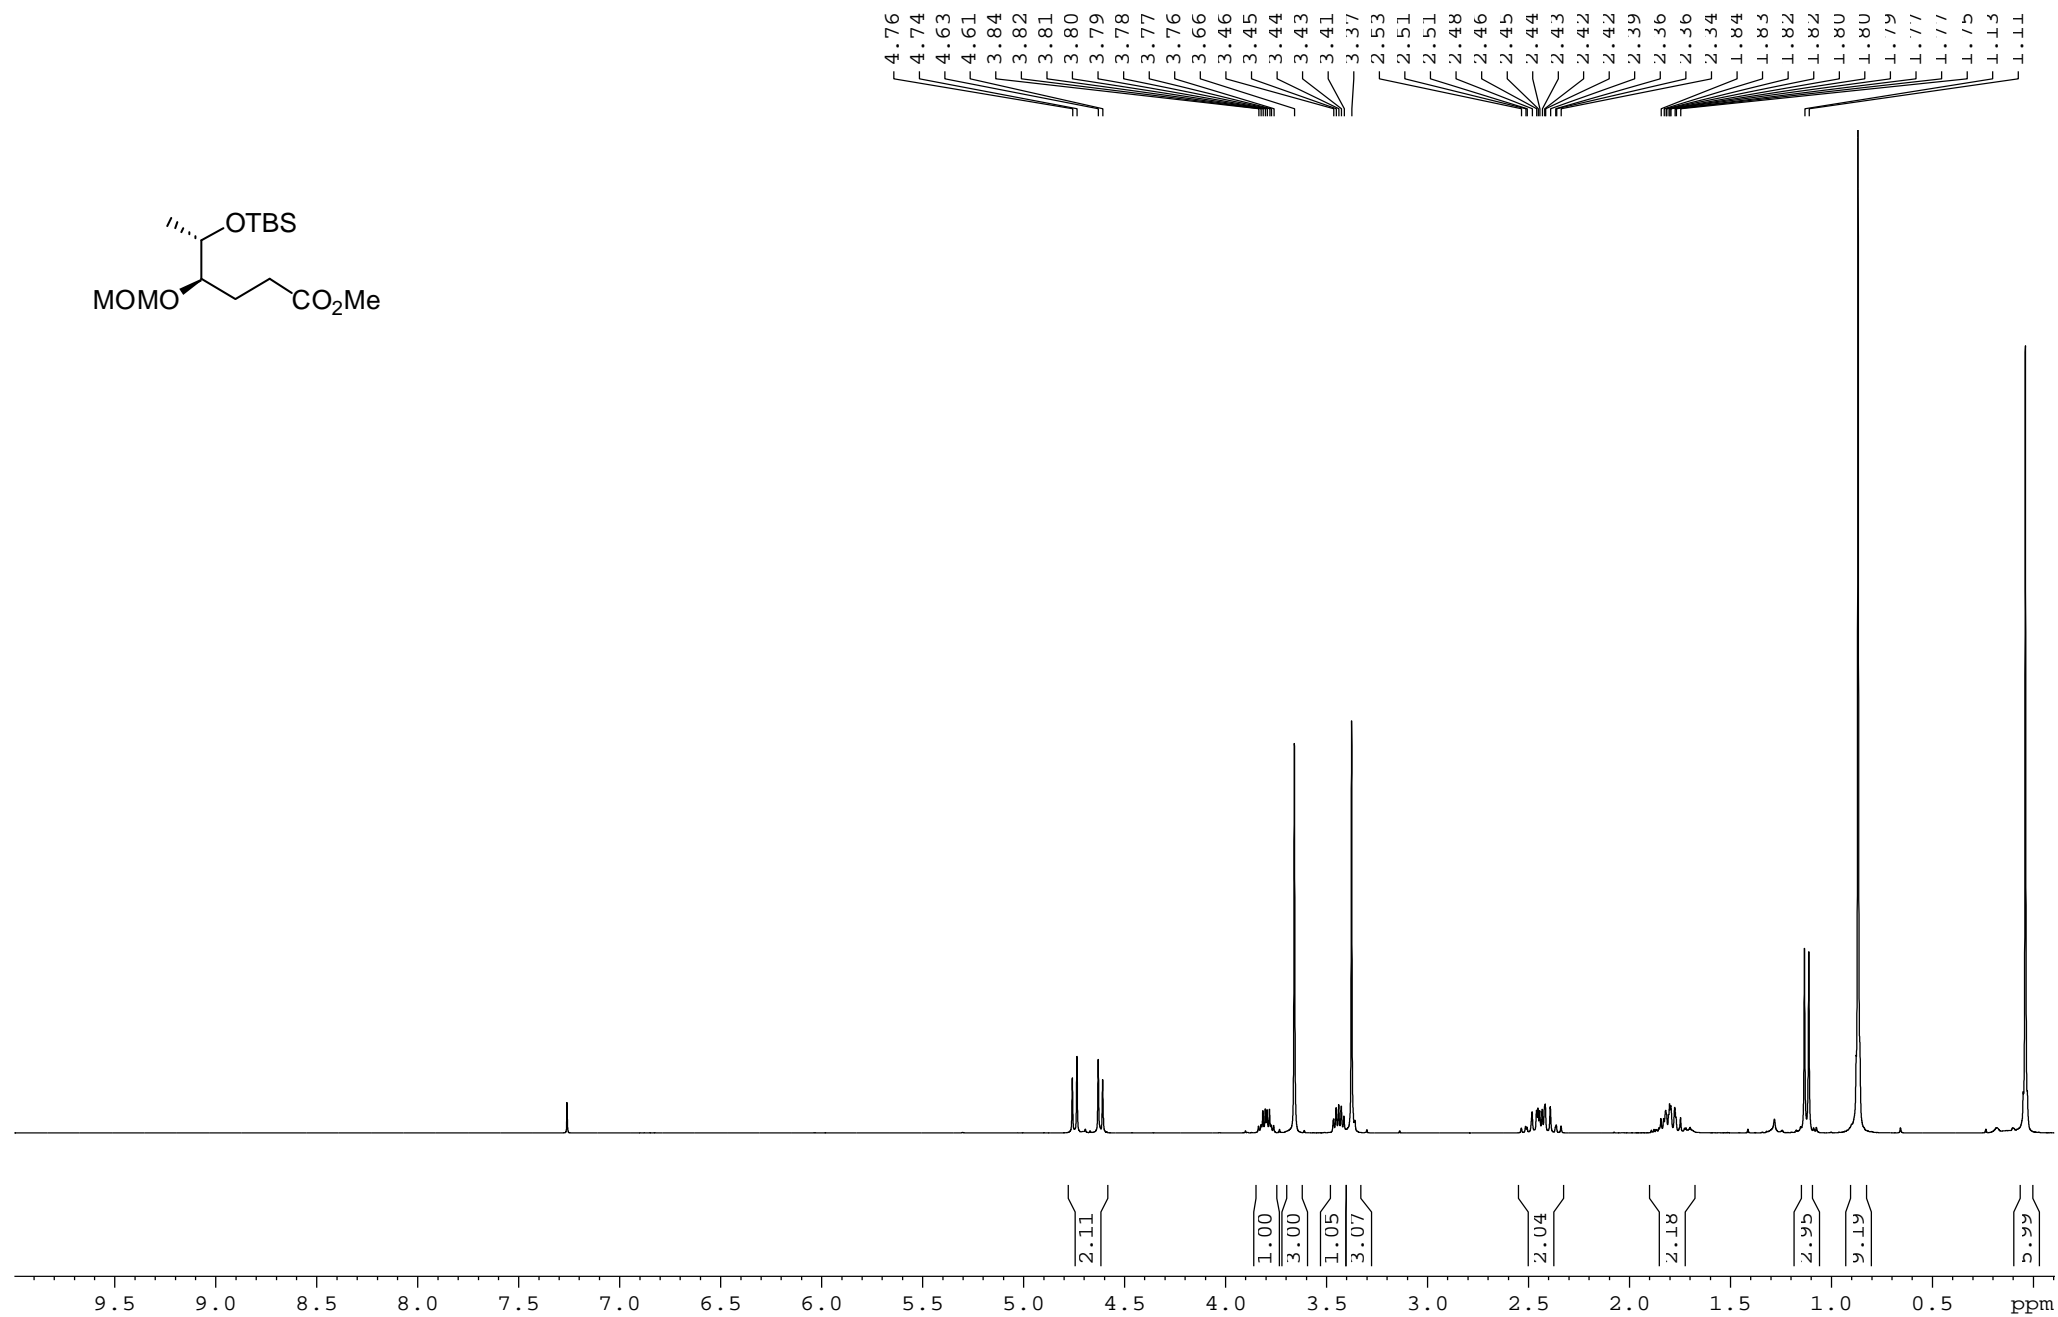

$^{13}\text{C}$  NMR-APT ( $\text{CDCl}_3$ , 75 MHz) of **9a**

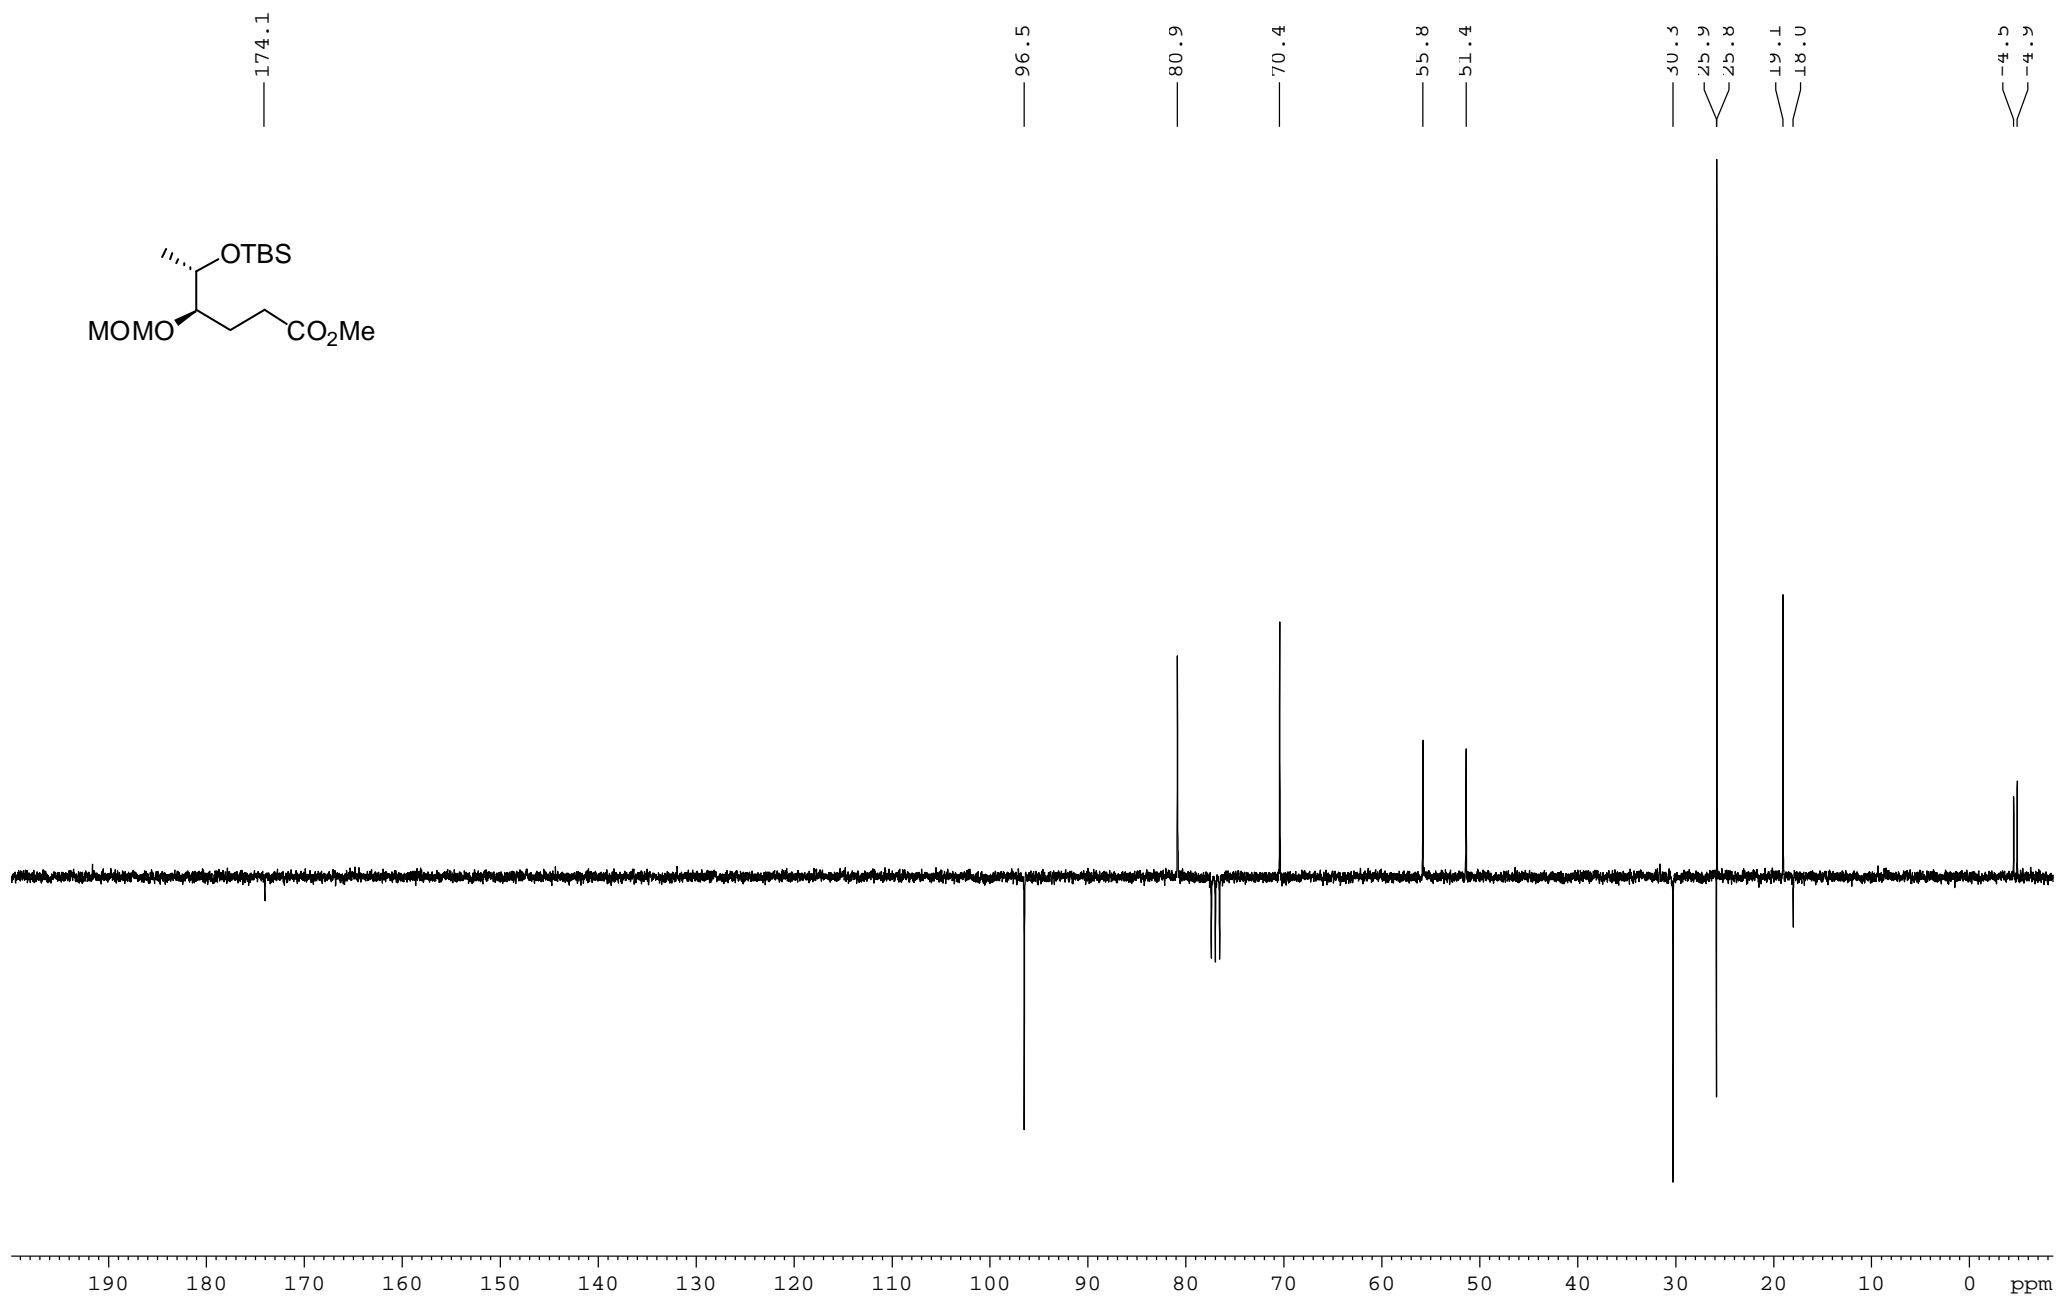

$^1\text{H}$  NMR ( $\text{CDCl}_3$ , 300 MHz) of **8b**

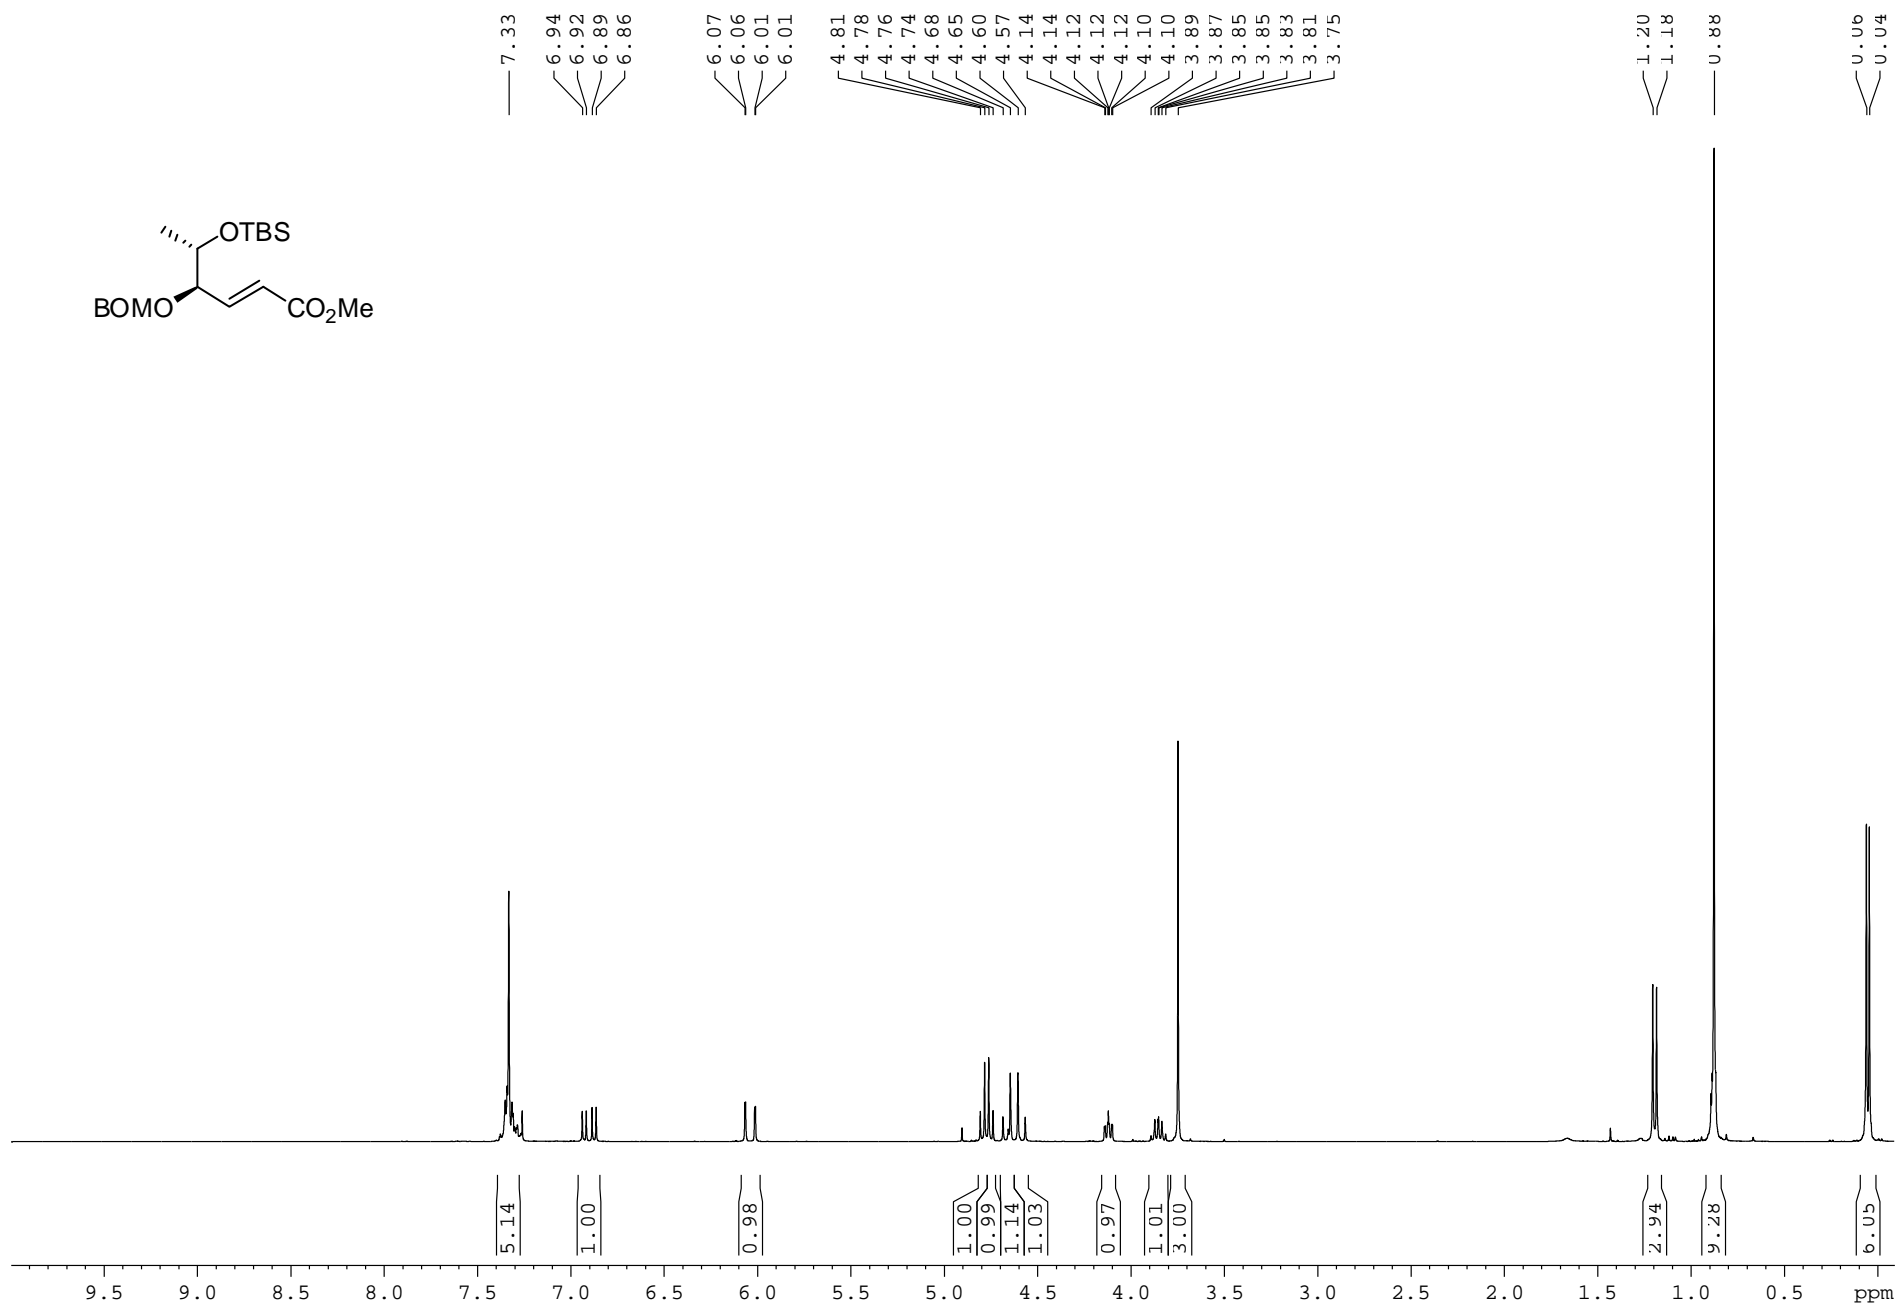

$^{13}\text{C}$  NMR-APT ( $\text{CDCl}_3$ , 75 MHz) of **8b**

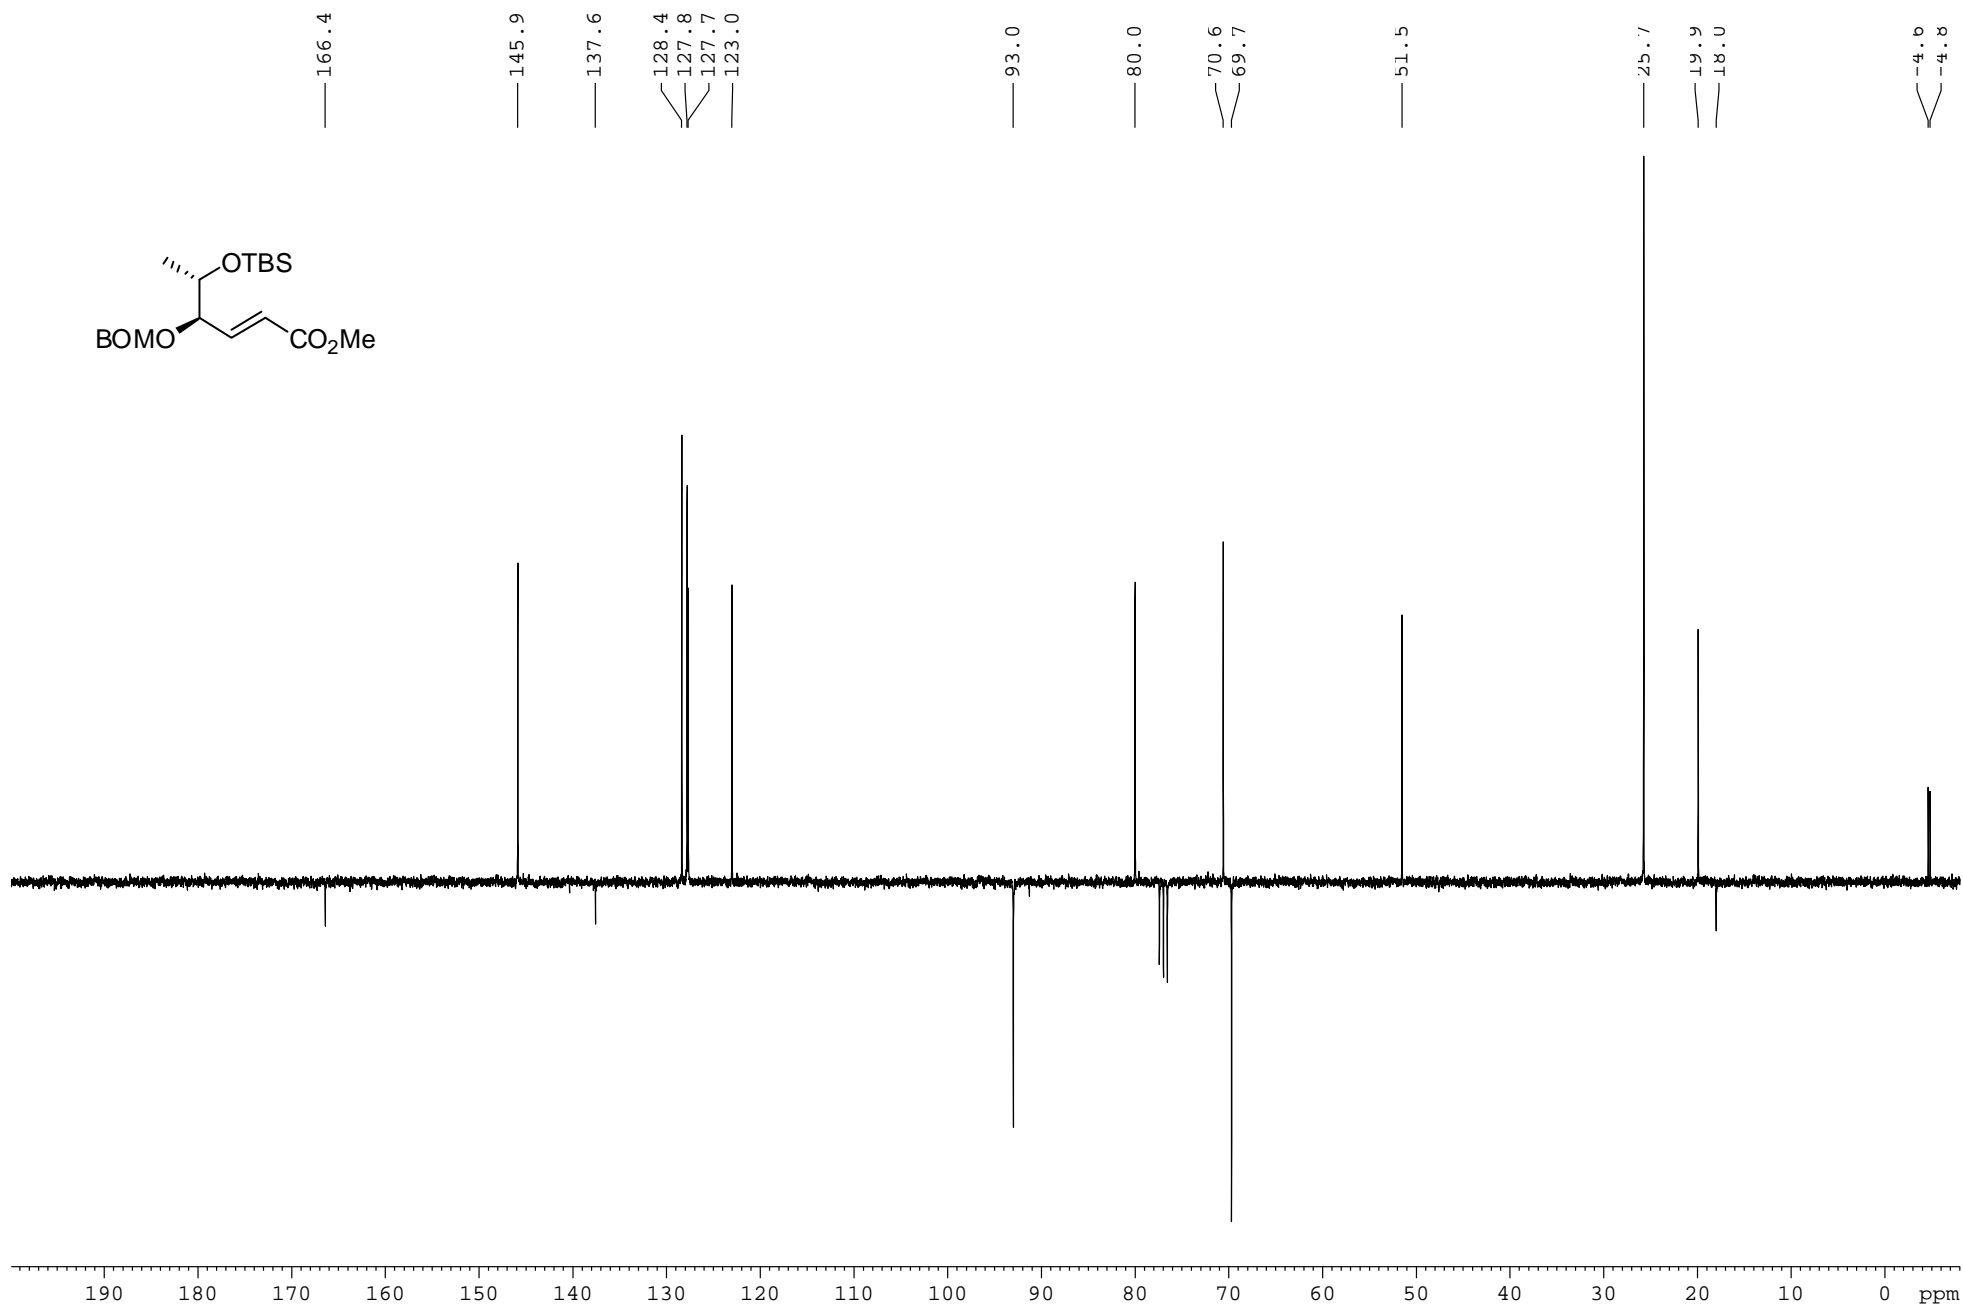

$^1\text{H}$  NMR ( $\text{CDCl}_3$ , 300 MHz) of **9b**

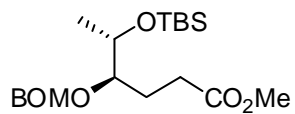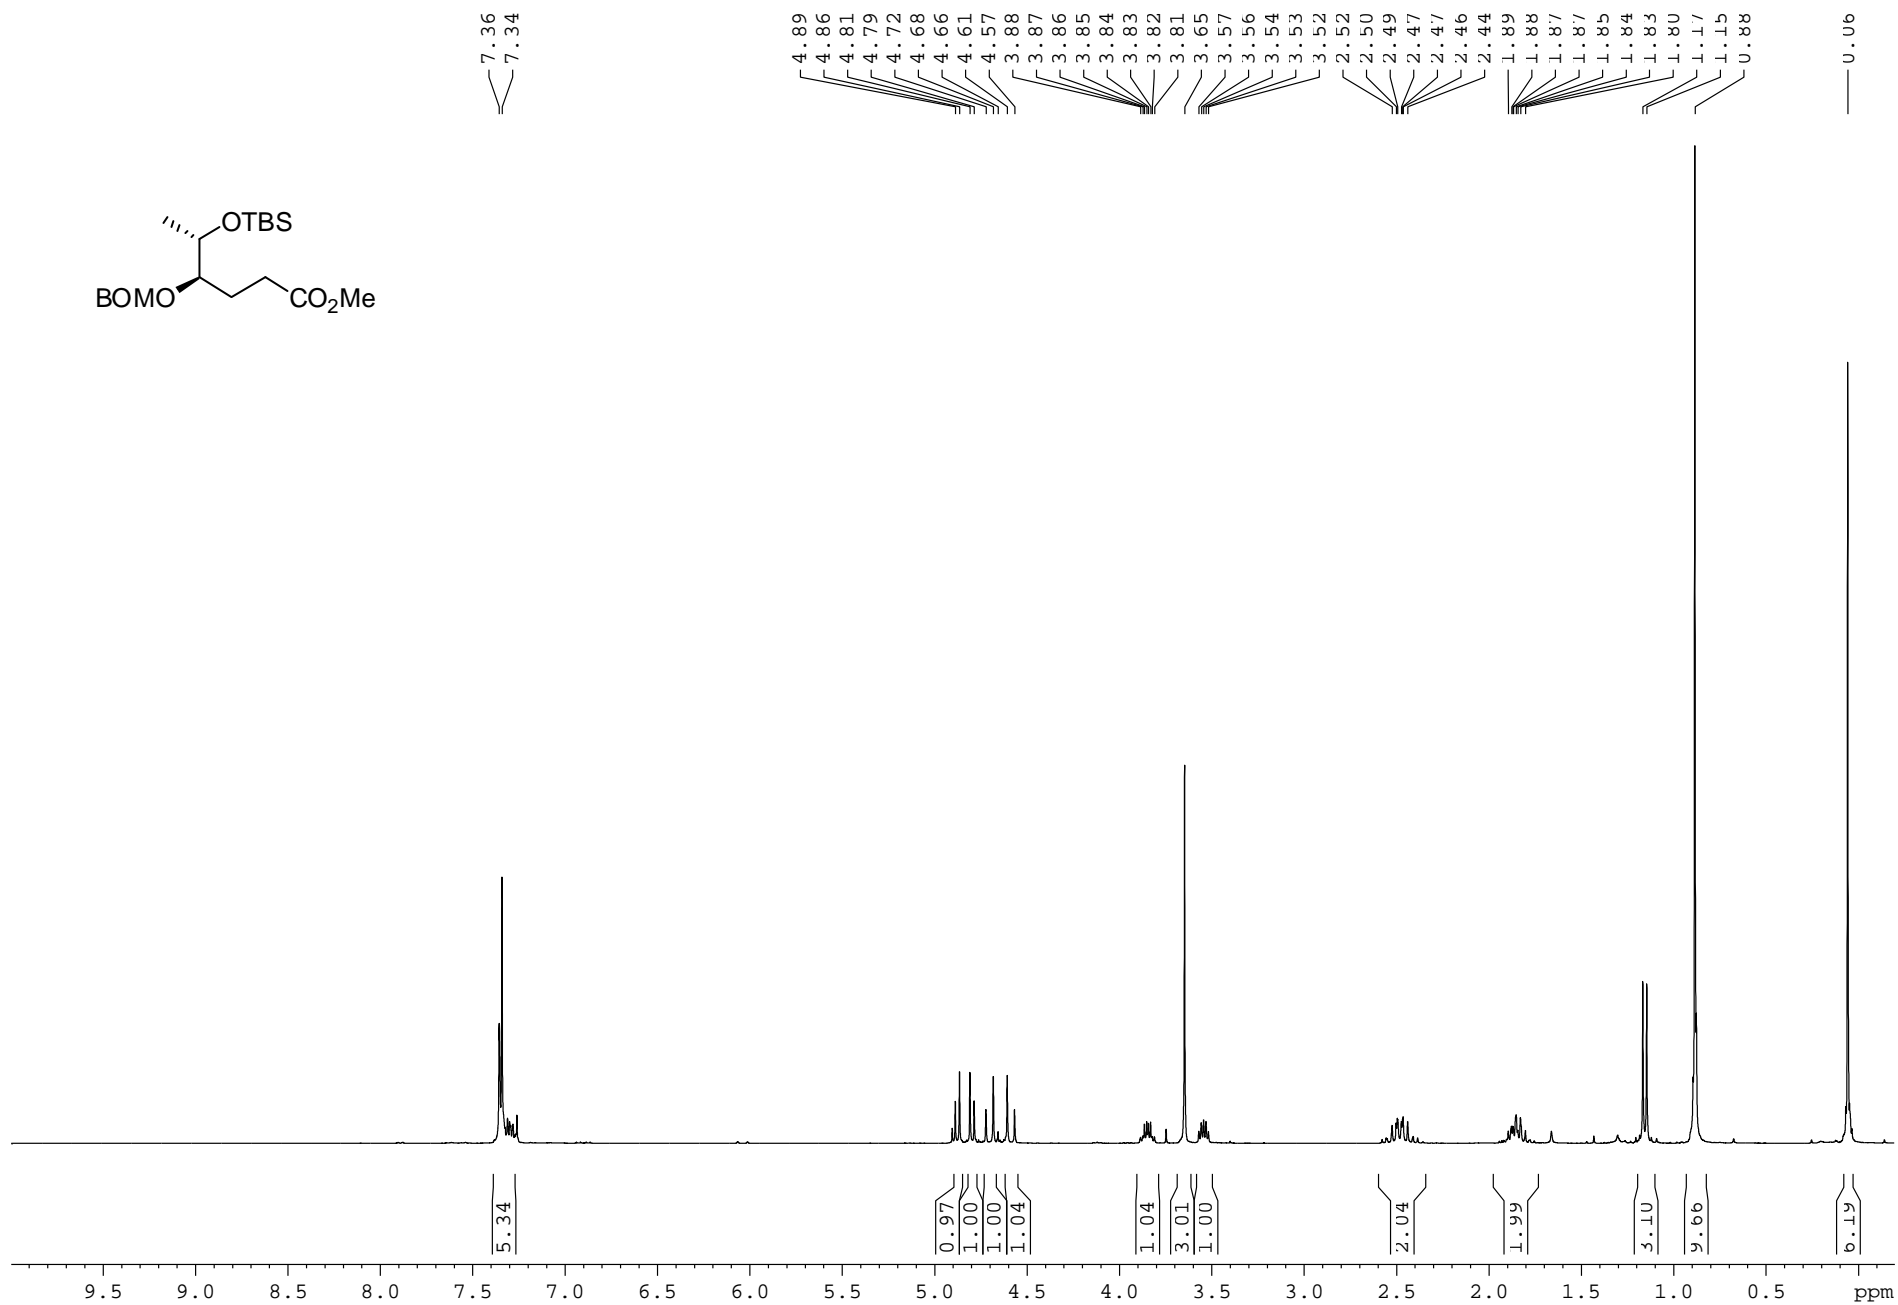

$^{13}\text{C}$  NMR-APT ( $\text{CDCl}_3$ , 75 MHz) of **9b**

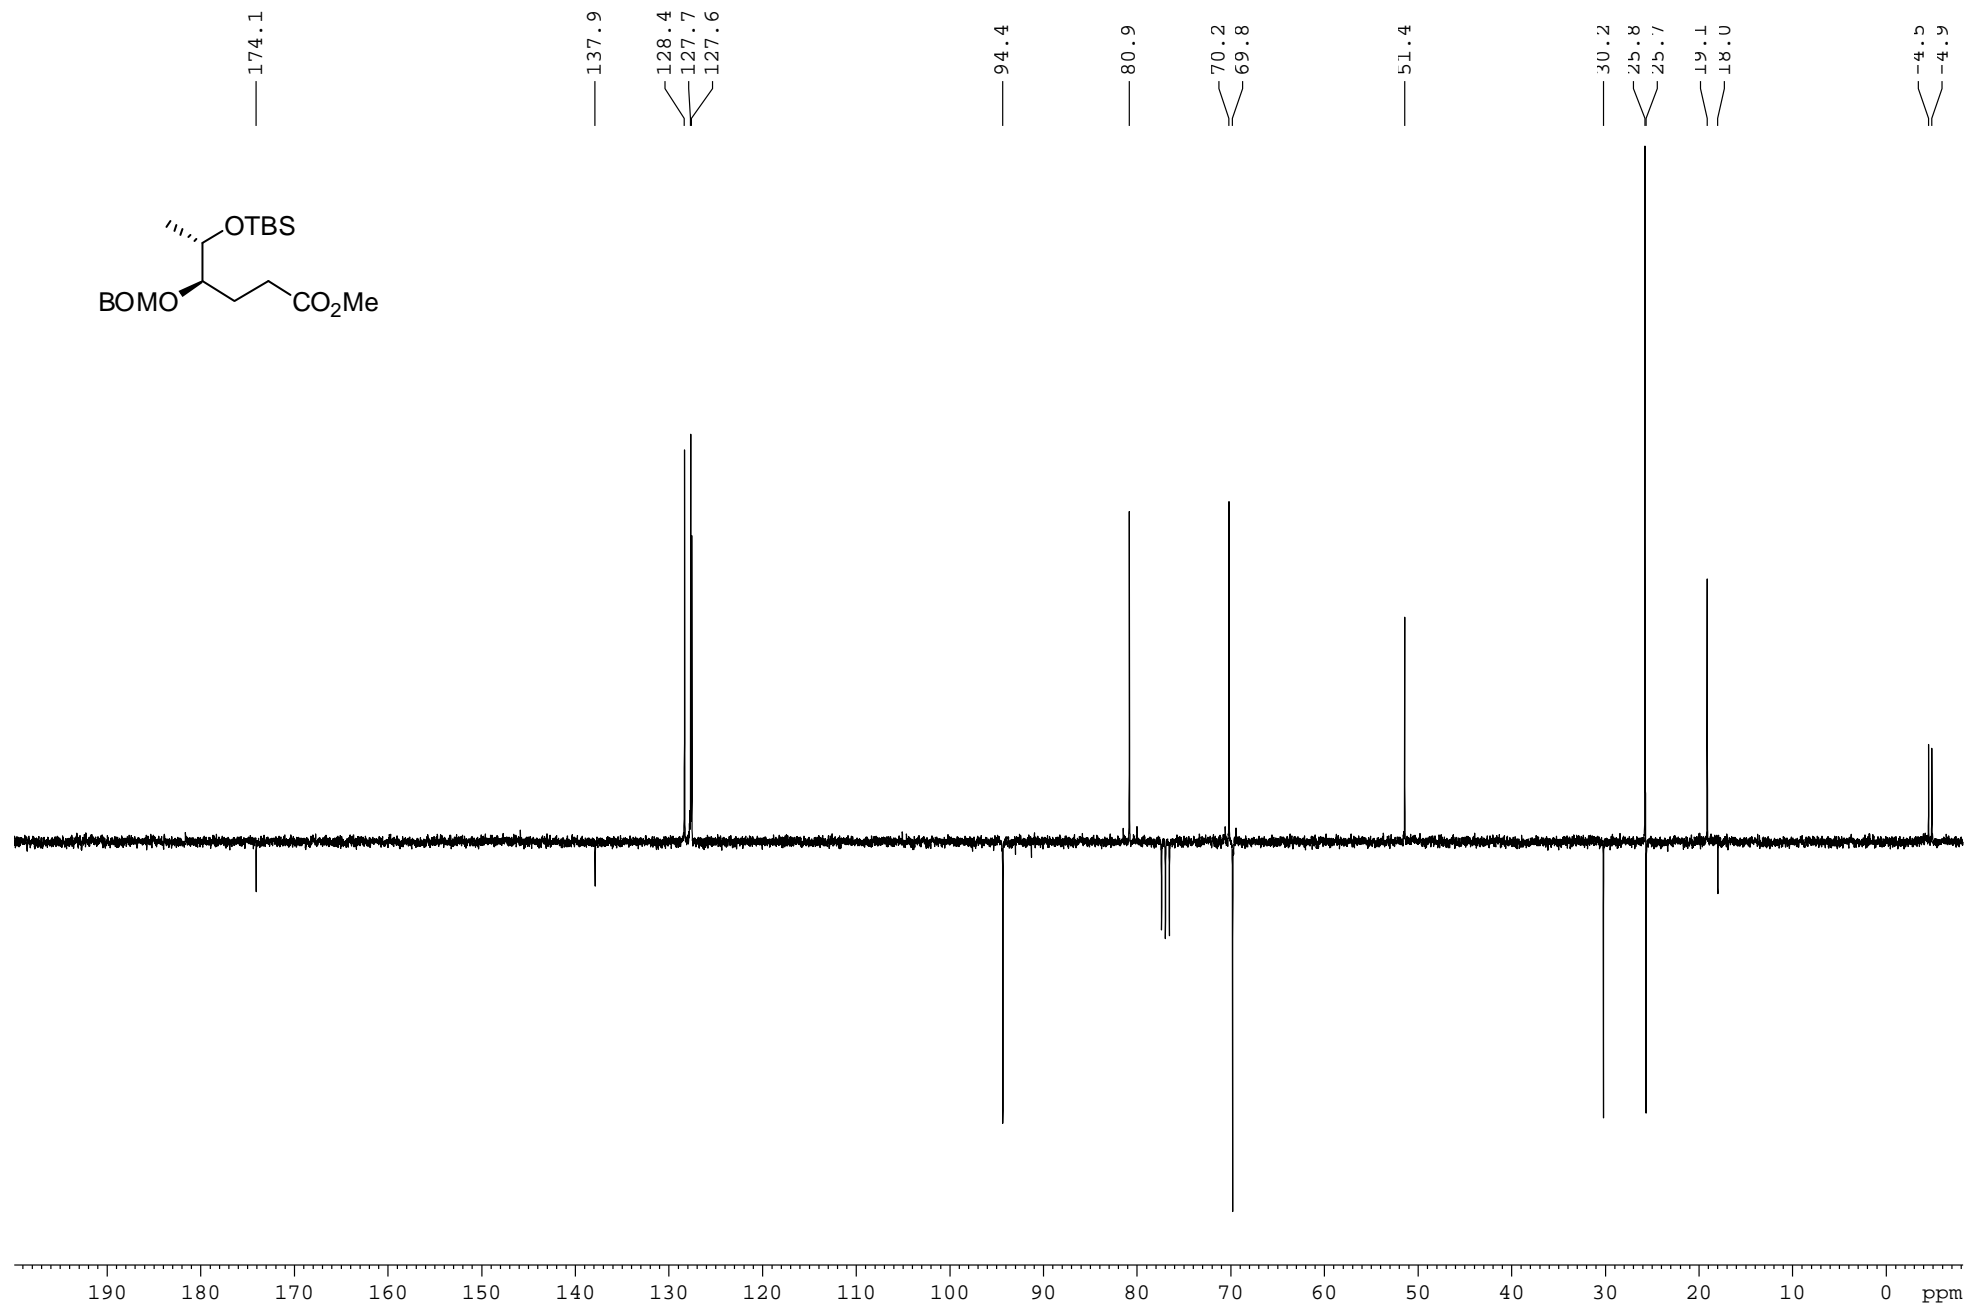

$^1\text{H}$  NMR ( $\text{CDCl}_3$ , 300 MHz) of **10**

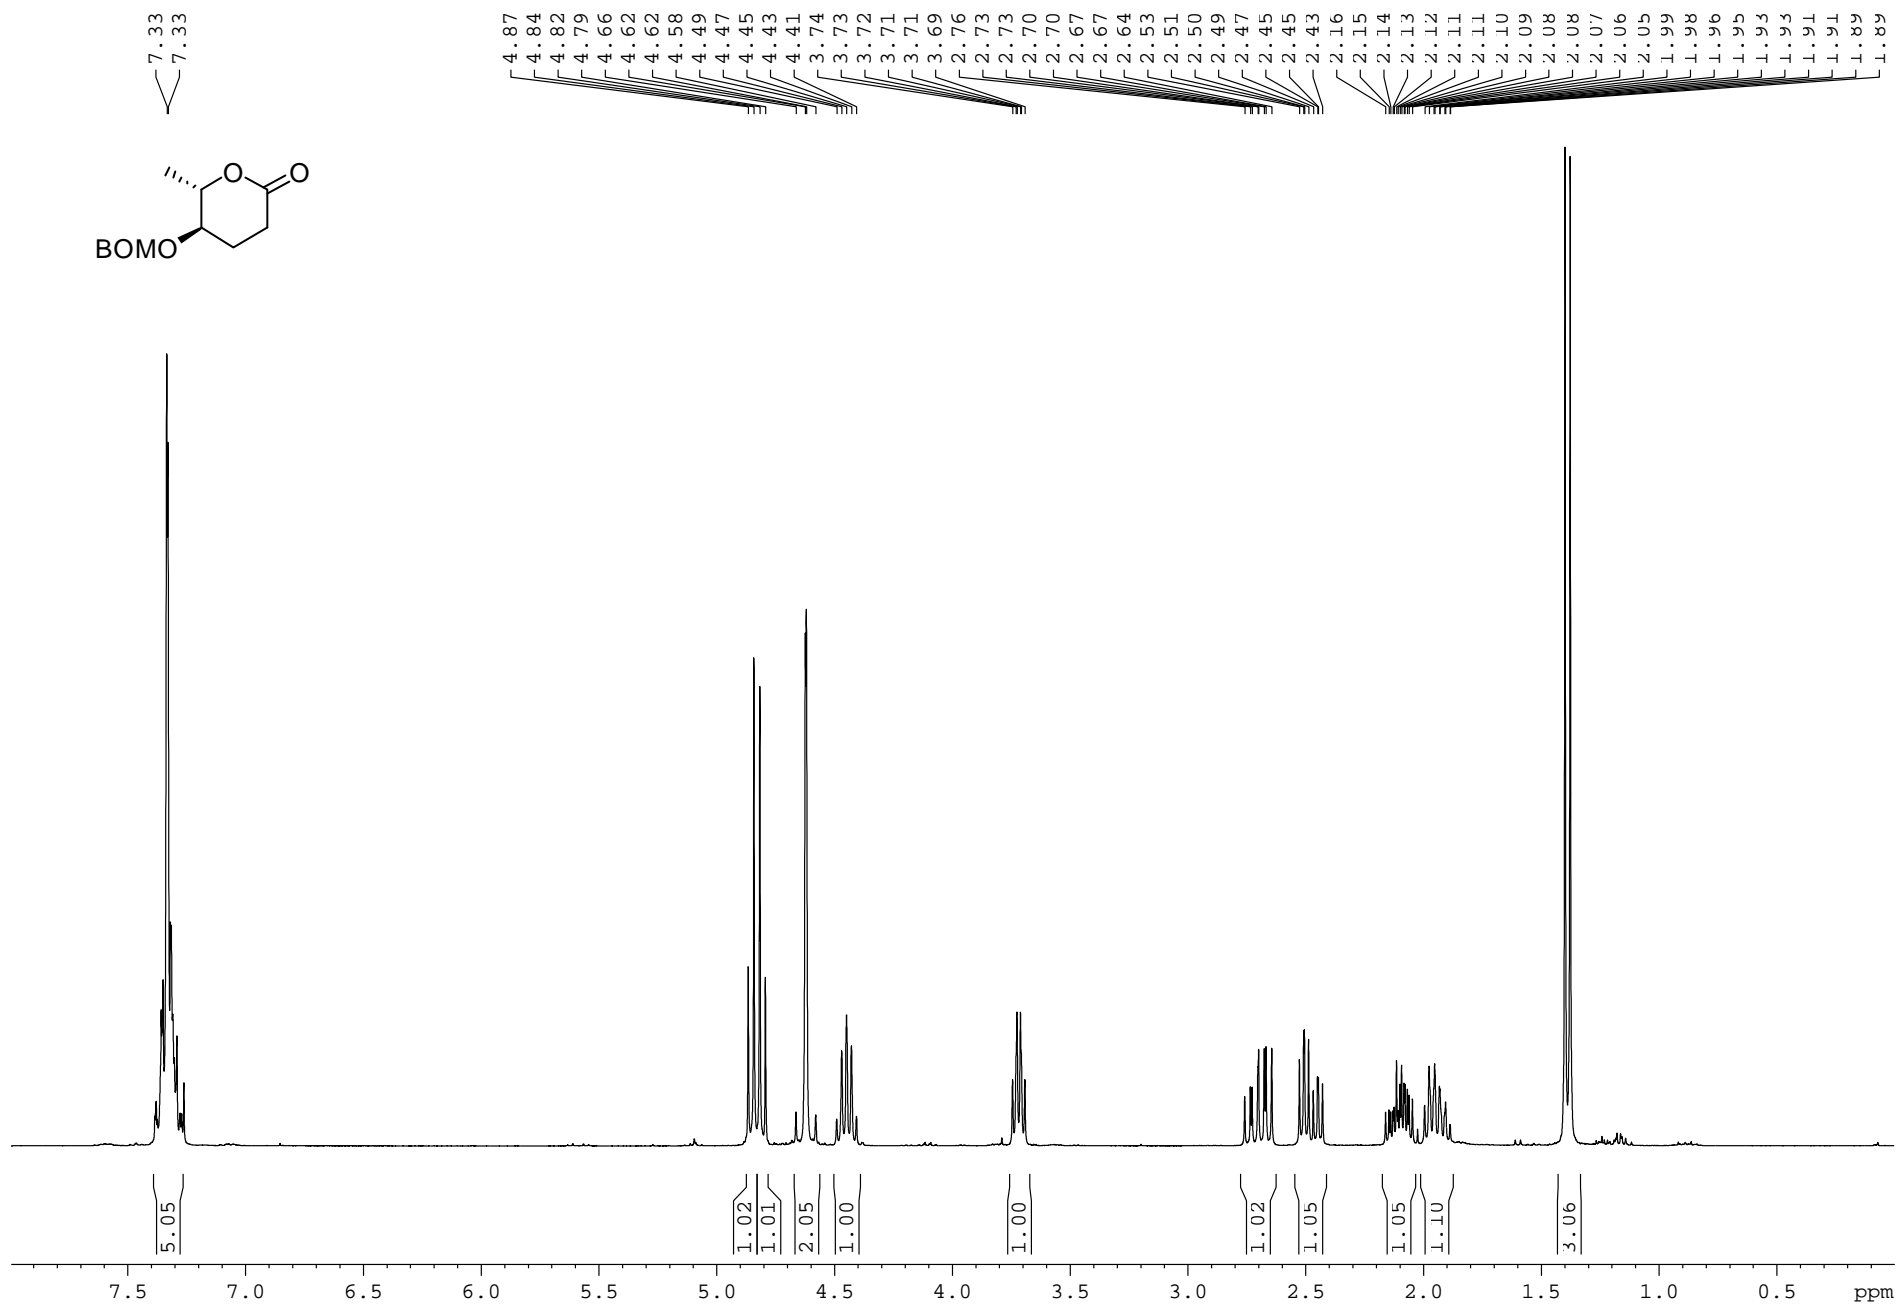



$^{13}\text{C}$  NMR-APT ( $\text{CDCl}_3$ , 75 MHz) of **10**

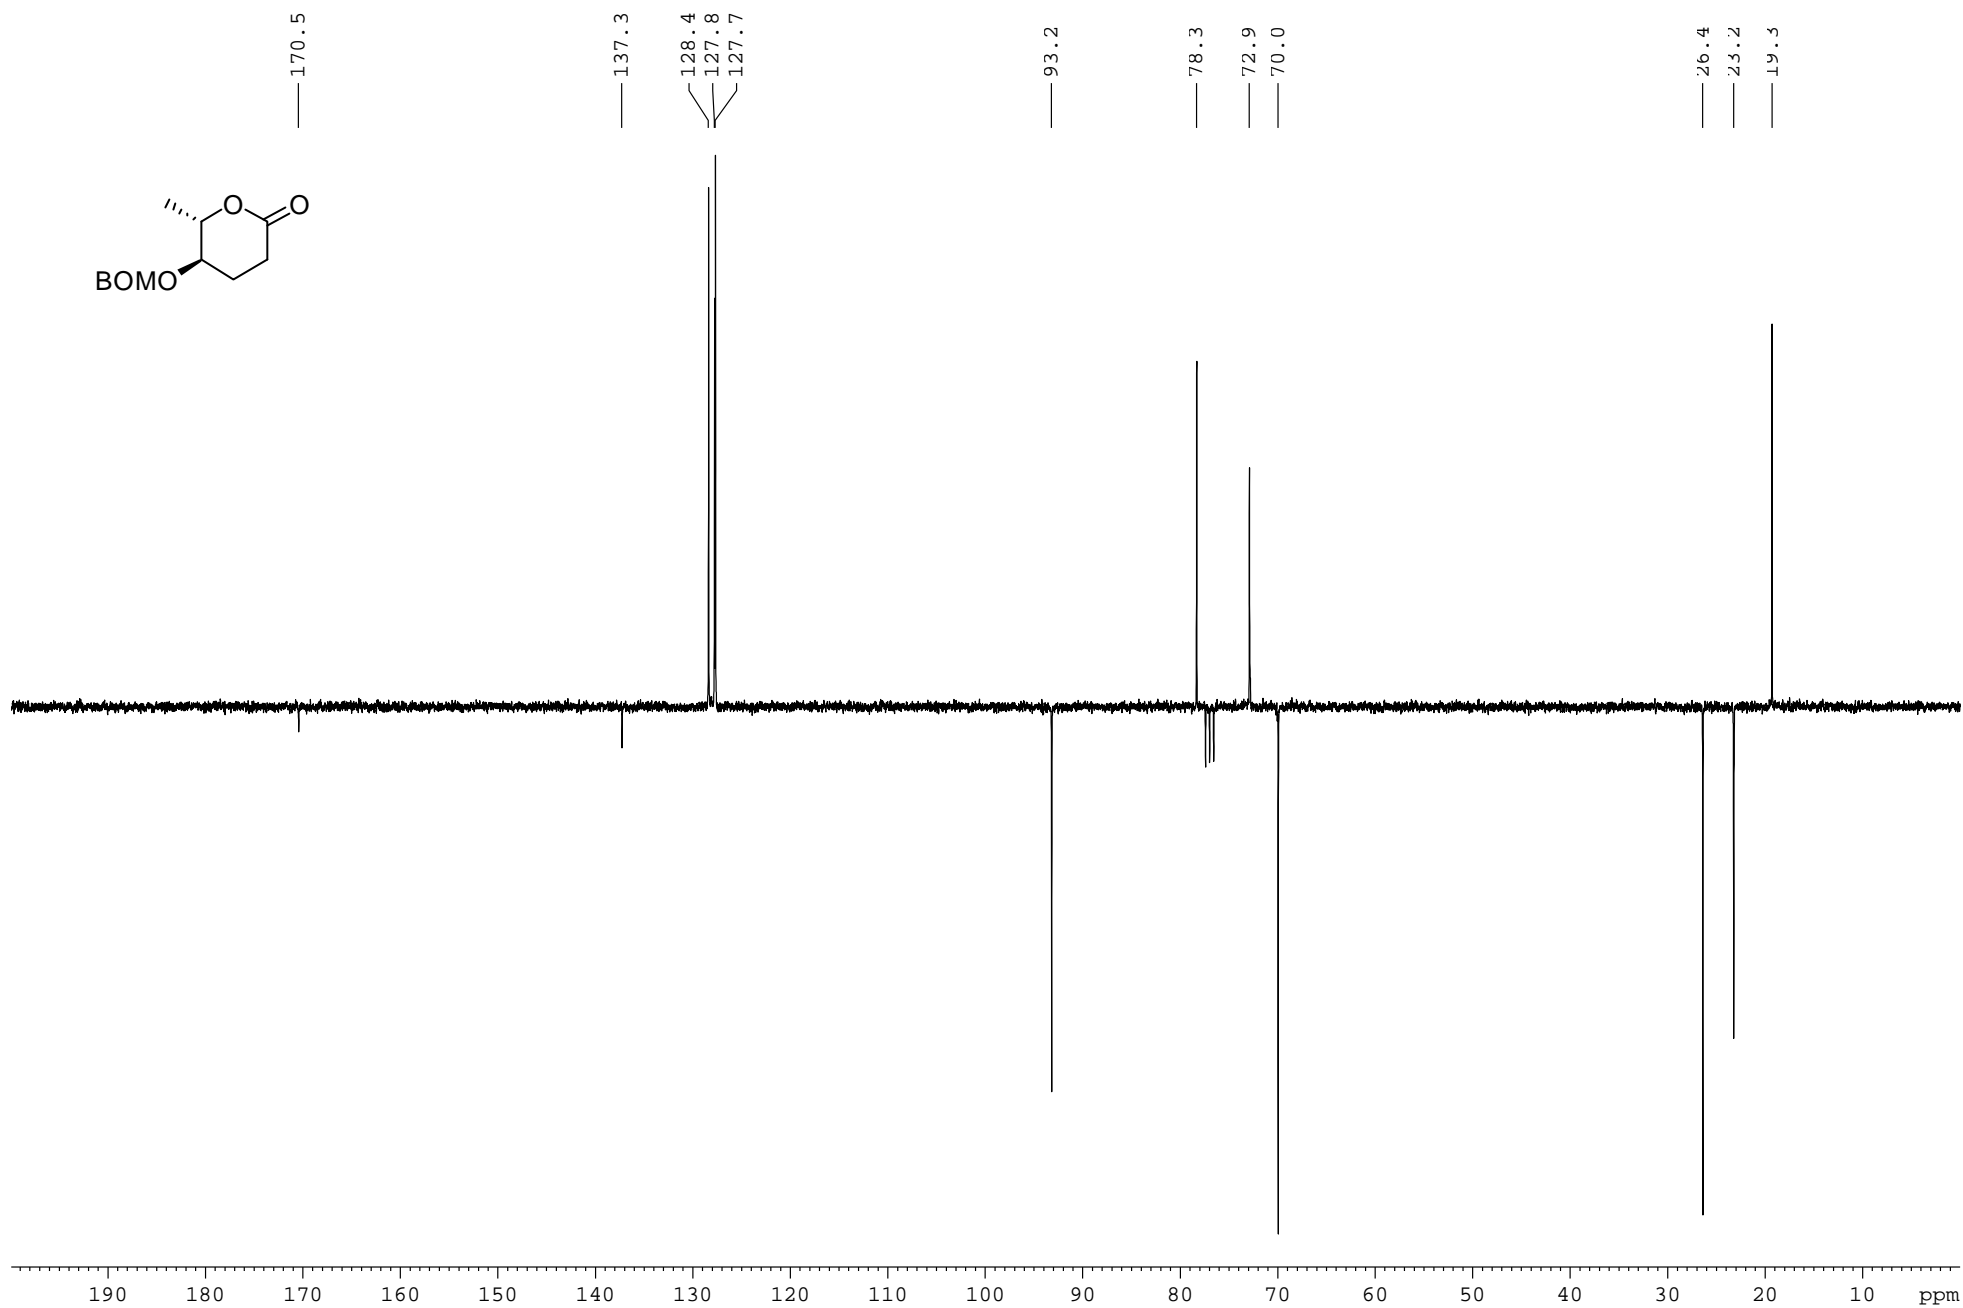

$^1\text{H}$  NMR ( $\text{CDCl}_3$ , 300 MHz) of **11**

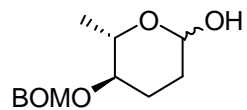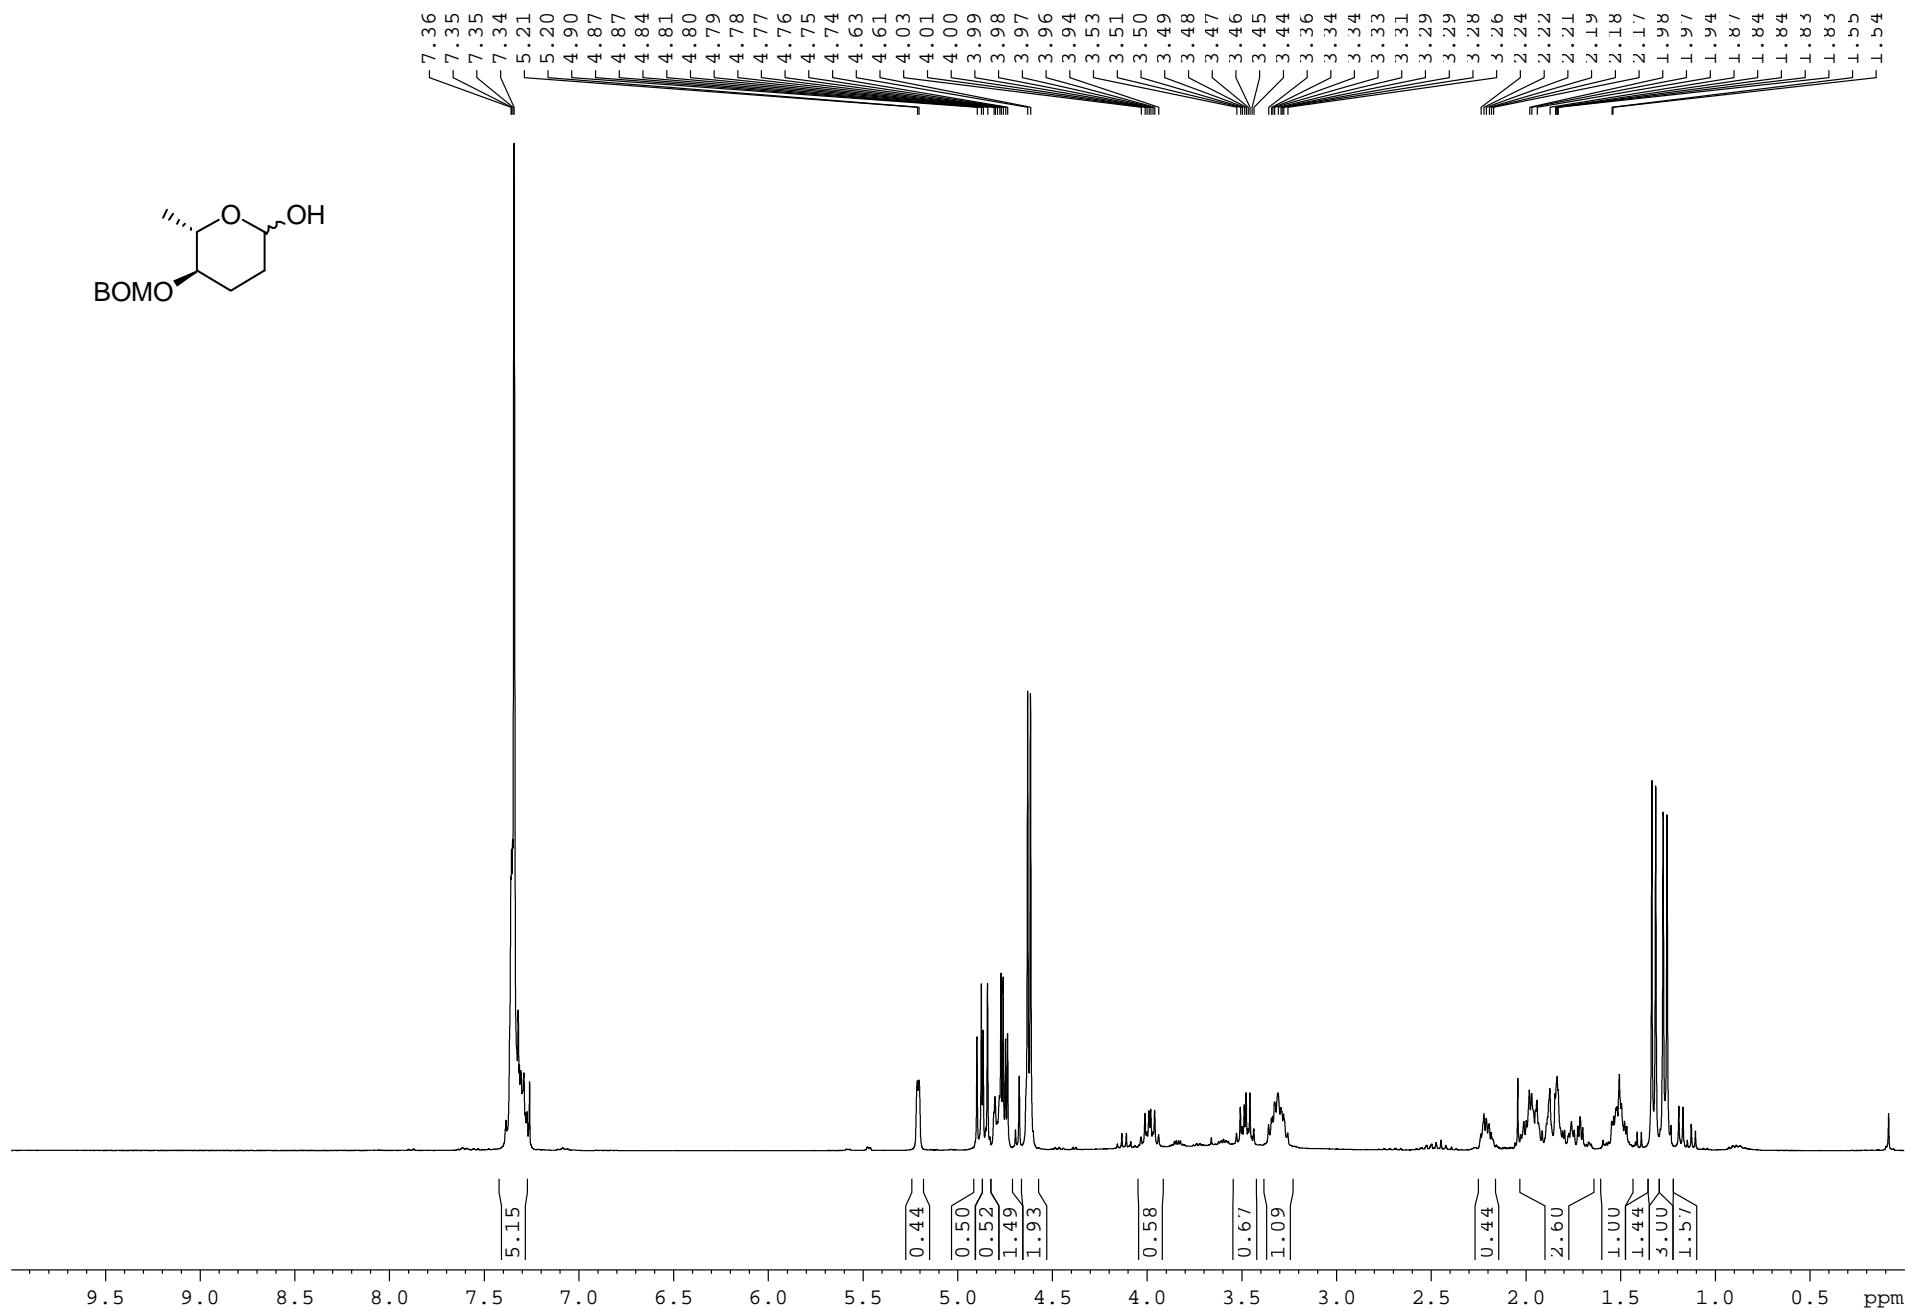

$^{13}\text{C}$  NMR-APT ( $\text{CDCl}_3$ , 75 MHz) of **11**

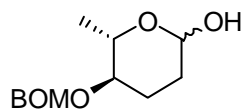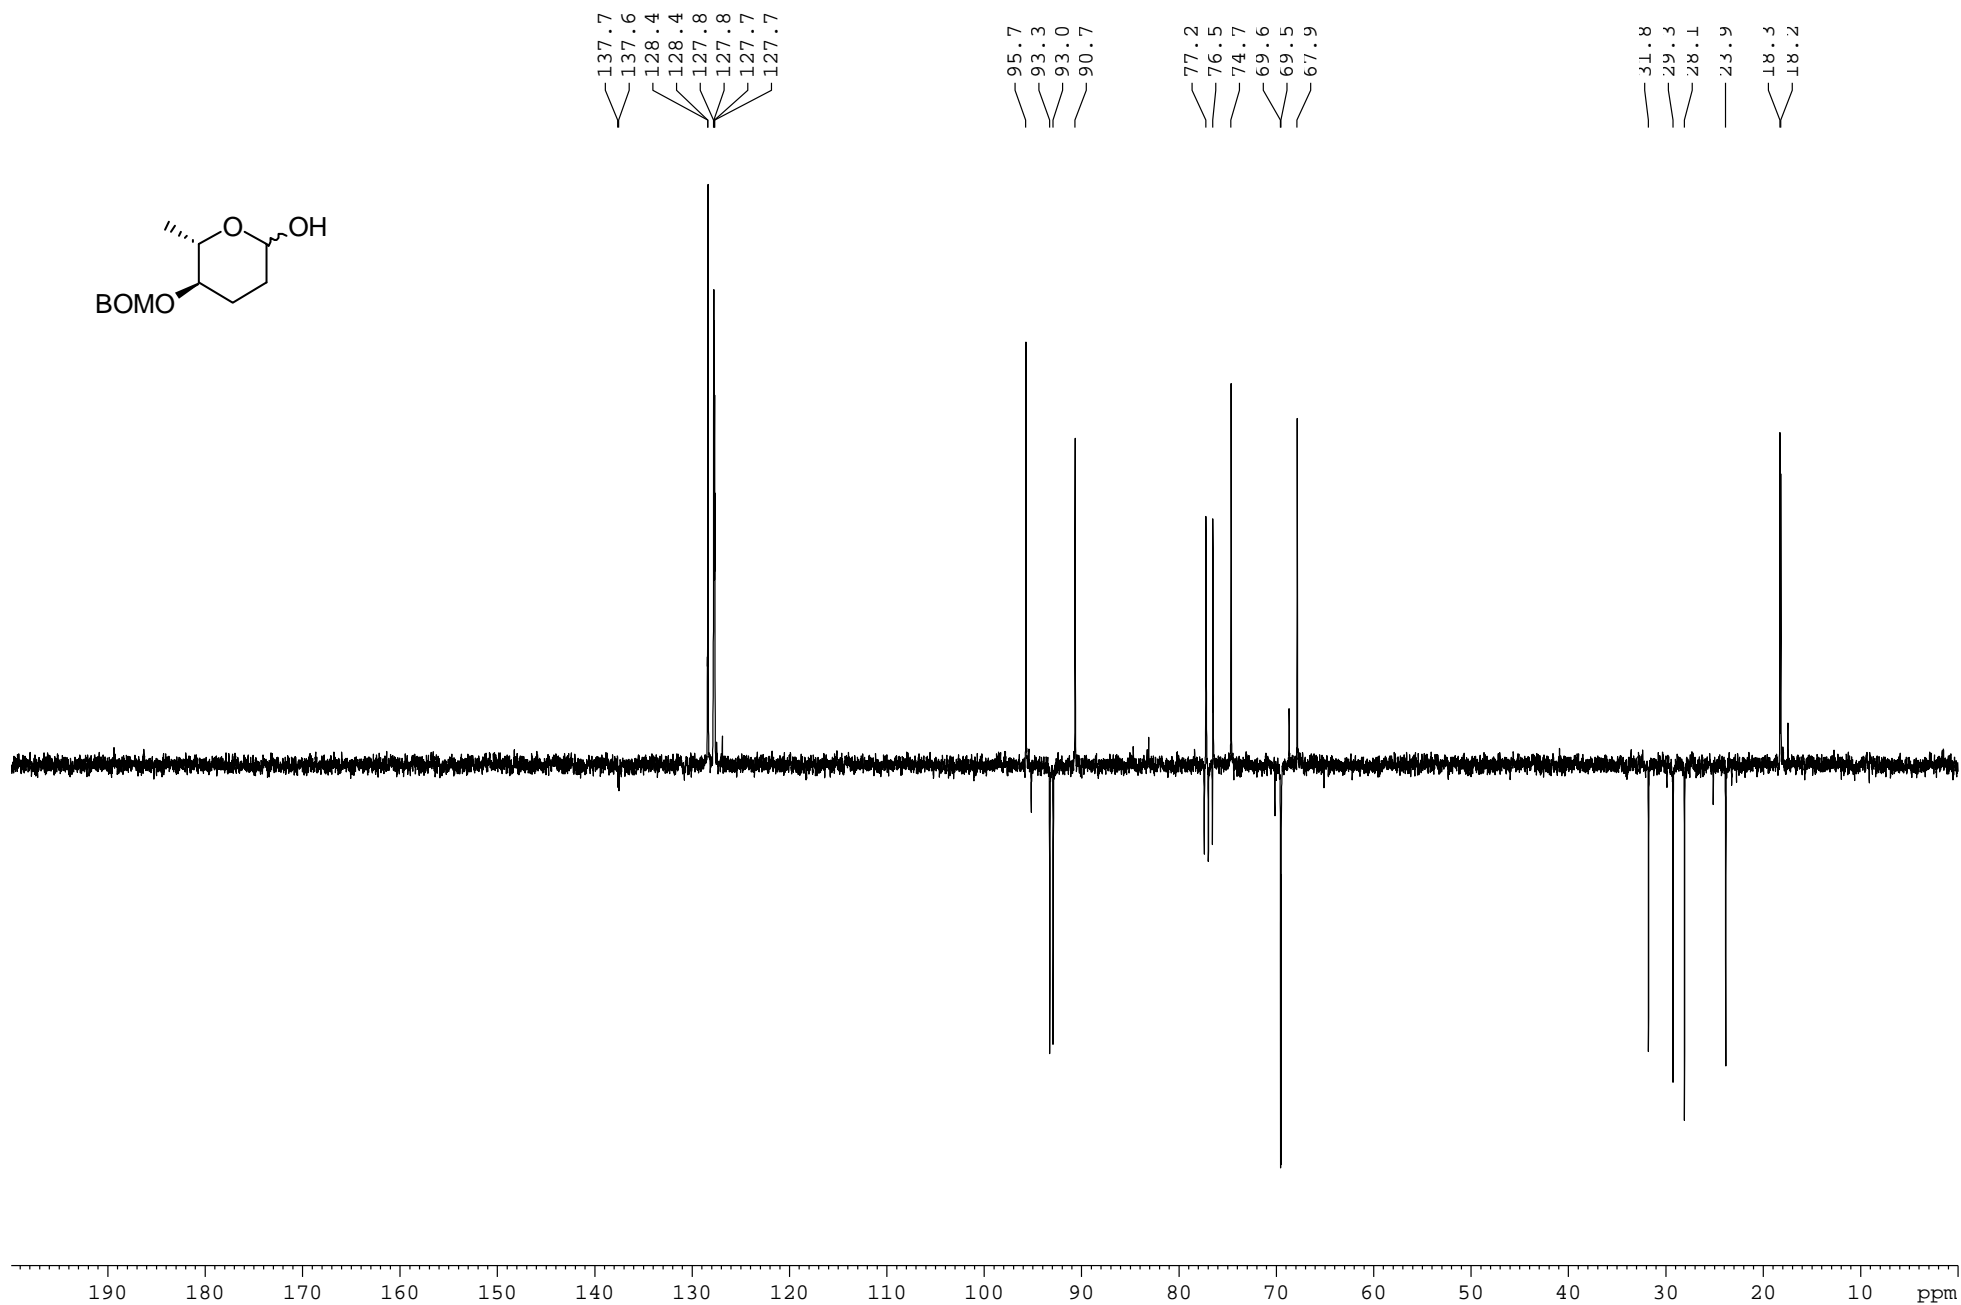

Supplement: c3ob40167g.pdf [file c3ob40167g.pdf]
